# Supplementary material for: Selenium intake help prevent age-related cataract formation: Evidence from NHANES 2001–2008
Source: Frontiers journal article supplement (doi:10.3389/fnut.2023.1042893), 2023-01-27
Supplement: Data_Sheet_1.zip [file Data_Sheet_1.zip]

## Sheet: total
SEQN	cataract	iron	zinc	copper	sele	gender	years	race	education	diabetes	BMI	calore	cottine	weight	SDMVPSU	SDMVSTRA
47963	2	0.96	0.18	0.196	0.5	2	60	4	2	1	37.97	345	0.034	4863.08	1	68
51498	2	0.19	0.73	0.326	0.9	2	56	3	2	2	20.65	34	250	7326.26	1	61
42099	2	1.84	1.41	0.465	1.3	1	66	3	5	2	36.66	231	7.91	9259.27	1	67
12902	2	0.51	0.34	0.251	1.6	1	60	4	2	2	21.71	314		8417.08	1	16
48458	2	2.53	0.51	0.023	2.1	2	51	4	3	2	31.64	860	261	11204.6	1	63
47331	2	3.29	4.9	0.513	2.8	1	65	2	1	1	28.27	640	0.011	1230.42	1	62
13686	2	0.42	0.34	0.105	3	2	51	4	3	2	26	290	0.266	8707.95	2	15
37755	2	2.95	2.28	1.106	4.7	2	57	1	4	2	17.88	726	0.021	2964.1	1	57
15389	2	0.24	1.84	0.053	4.8	1	72	4	2	2	35.74	535	0.035	1659.39	1	25
47156	2	2.86	2.83	0.453	4.8	2	60	4	4	2	42.25	1280	0.113	4898.62	2	67
34904	2	1.89	2.04	0.25	5.3	1	61	4	2	1	19.7	621		1402.03	2	45
40154	2	1.98	0.92	0.11	5.8	2	62	1	1	1	37.5	380	0.105	1840.08	1	55
24648	2	3.84	3.4	0.416	5.9	1	53	4	3	2	26.87	871	295	13117.7	1	41
28010	2	0.95	0.59	0.089	5.9	2	67	2	1	2	34.39	171	1.04	3941.37	2	41
14953	2	7.57	1.16	0.294	6.3	2	73	2	1	2	28.66	345	0.056	16475.4	2	27
43769	1	2.09	0.96	0.433	6.4	2	80	3	1	2	27.02	836	0.315	10329.5	2	60
12759	1	1.12	0.72	0.069	7	2	78	4	1	1		164	1.95	2246.14	1	27
23446	2	5.4	2.07	0.235	7.2	2	63	3	1	2	32.65	273	0.452	4993.68	2	31
10375	1	3.27	1.79	0.758	8.1	1	75	3	4	2	22.27	474	120	5017.48	1	16
22551	2	4.41	3.52	0.838	8.6	1	53	4	4	2	26.16	1676	423	3395.78	2	39
28419	2	2.67	0.55	0.291	8.7	1	74	4	2	2	20.24	819		3362.21	2	31
50060	1	1.52	1.7	0.371	8.8	1	80	3	5	2	21.91	507	0.075	5383.94	1	60
35957	2	3.05	2.12	0.609	8.9	2	59	3	2	2	33.1	633	221	13604.5	2	54
37497	2	5.49	4.75	1.06	9.3	2	62	3	4	2	31.64	413	169	6908.3	1	46
17855	1	3.29	1.77	0.788	9.6	2	71	3	4	2	23.38	609	0.011	6228.29	1	16
13488	2	2.94	1.36	0.372	9.8	1	70	2	1	2	26.96	396	214	4159.94	2	27
31527	2	3.89	1.91	0.319	10.2	1	59	3	4	2	21.34	1177	333	10028	2	56
25264	1	10.35	8.42	0.713	10.6	1	85	3	5	2	30.41	1025		9258.42	2	30
28740	2	2.58	1.51	0.401	10.6	2	66	3	3	2	27.8	375	0.018	25494.2	2	34
25305	2	3.49	2.29	0.485	10.8	1	56	1	1	2	26.97	696	0.085	2240.88	1	41
28781	1	0.62	1.95	0.227	11	2	73	5	1	2	27.2	468	0.02	9896.7	1	34
38010	1	3.21	3.03	0.576	11.2	2	81	4	3	2	32.76	591	149	3785.97	1	44
43726	2	21.03	17.14	0.537	11.2	2	76	4	4	1	30.46	577	0.027	6996.43	2	66
33646	2	3.3	2.46	0.476	11.3	1	63	3	4	2	26.23	488		14934.6	2	48
20920	2	1.41	1.25	0.229	11.4	1	81	4	1	2	31.47	376		12778.2	1	27
50170	2	2.16	1.67	0.457	11.5	2	63	2	1	2	23.3	479	0.114	1198.79	2	61
18599	2	2.98	1.87	0.48	11.6	2	77	3	2	2		669	0.027	5536.81	2	23
16664	2	3.46	1.18	0.488	11.8	2	65	4	3	2	36.61	475	0.414	5880.11	2	20
19554	1	2.53	1.04	0.469	12	2	85	3	3	2	23.56	308	0.011	3412.98	1	15
46236	1	9.83	5.59	0.891	12.1	2	80	5	1	2	27.63	840	494	5062.27	1	59
51592	2	2.63	0.77	0.247	12.1	2	62	3	1	1	39.27	379		6392.91	2	59
16247	1	9.04	1.31	0.21	12.2	2	84	1		2	28.14	469	3.72	2454.89	2	27
20850	2	7.24	22.03	0.484	12.7	1	61	4	2	2	25.96	1707	0.325	1965.54	2	26
32300	2	4.11	2.92	0.416	12.9	1	53	4	5	2	17.2	950	189	2207.76	2	45
21054	2	2.95	2.22	0.404	13	2	59	3	4	2	26.89	478	0.011	12479.4	2	39
29943	2	1	1.41	0.13	13.1	1	60	4	2	1	26.99	331	181	1795.31	2	39
41167	2	1.08	1.14	0.232	13.1	2	52	4	3	2	44.5	401	0.027	4829.11	1	51
37071	2	4.03	2.04	0.733	13.5	1	59	4	3	2	25.67	1019	0.094	7242.41	1	44
45083	2	5.45	4.47	1.344	13.5	1	68	2	4	2	31.87	588	0.074	2334.72	1	71
27963	2	2.11	1.11	0.31	13.6	2	82	3	1	2	18.78	335	0.011	4880.46	2	39
11841	2	1.45	2.12	0.248	13.7	2	61	3	1	2		318	0.174	6827.6	1	24
40152	2	8.67	8.74	1.069	13.7	1	68	1	5	2	29.08	1013	0.011	1476.03	1	58
24059	2	3.29	1.93	0.327	13.9	1	78	4	3	2	27.1	642	366	2759.41	2	33
36582	2	1.95	1.09	0.173	13.9	2	61	4	2	2	19.38	262	3.24	3199.96	2	51
25288	2	2.44	1.32	0.193	14	1	76	3	1	1	22.4	340	309	3927.97	1	42
51019	2	2.16	1.67	0.139	14.2	1	63	2	1	1	26.58	345	0.024	1348.84	2	61
14071	2	4.43	4.49	0.479	14.5	1	69	3	5	2	27.91	591	0.011	11511.6	2	19
46629	1	2.64	2.98	0.355	14.7	1	80	3	2	2	27.69	792	0.032	3585.93	2	60
26340	2	3.79	1.95	0.303	14.8	2	50	4	3	2	35.62	780	1.08	14398.7	2	39
35235	1	4.39	2.28	0.555	15.2	2	82	5	3	2	30	680	0.04	13305.1	2	57
27363	2	3.45	1.46	0.46	15.3	2	58	4	4	2	43.27	695	0.02	14055.9	1	41
44928	2	7.85	3.39	1.273	15.8	1	77	4	3	2	30.08	1103	0.035	2300.23	1	64
14069	2	3	2.8	0.306	16.1	1	61	3	1	1	32.19	1090	671	8694.15	1	19
49147	2	4.55	4.99	0.517	16.1	2	64	1	1	2		1065	0.028	2979.12	2	72
24168	2	1.59	1.76	0.196	16.3	2	66	4	1	2	27.23	223	0.045	3535.38	2	31
41984	1	1.17	1.33	0.289	16.3	2	78	2	4	2	34.91	254	0.011	3262.65	1	72
15262	2	4.59	1.81	0.599	16.4	1	81	3	2	2	22.72	958	2.58	3526.79	2	18
17092	1	4.09	3.04	0.465	16.4	1	85	3	1	2		898	0.068	4265.27	2	20
48648	2	3.72	2.57	0.455	16.4	1	61	4	2	2	21.89	737	302	1416.86	2	62
20918	2	9.2	2.31	0.555	16.5	1	63	1	1	1	25.85	567	0.011	1377.28	1	15
22415	1	4.74	3.14	0.619	16.5	2	84	3	4	2	30.08	612	0.011	6382.28	1	31
46731	2	1.65	0.92	0.338	16.5	2	62	1	3	1	36.64	464	0.017	3217.26	2	70
46345	2	1.68	2.39	0.376	16.7	2	59	1	4	2	26.89	548	0.011	4608.06	1	66
46972	1	3.86	5.08	0.905	16.7	2	66	3	3	2	22.1	1202	0.017	14203.5	2	64
51336	2	0.76	2.32	0.647	17	1	57	2	4	2	27.5	1005	0.088	2103.17	2	61
12820	2	1.66	1.26	0.251	17.4	2	56	4	2	1	29.78	334		6693.19	1	16
49092	2	2.96	2.98	0.417	17.4	1	80	3	5	2	24.42	749	136	3910.48	1	70
39638	2	4.88	1.76	0.291	17.5	2	70	3	2	2	22.61	953	287	8158.94	2	48
41026	1	3.86	2.26	0.568	17.6	2	83	4	1	2	24.46	561		3739.45	1	49
46807	2	15.62	3.2	0.596	17.6	1	66	3	2	1	26.72	747	6.85	4975.16	1	61
18412	2	5.18	2.25	0.336	17.7	1	63	5	2	2		316	48.9	3449.44	1	17
21096	2	4.7	3.31	0.61	17.8	2	68	3	4	2	21.95	605	0.053	10864.2	2	31
23531	2	3.14	0.83	0.239	17.8	1	70	3	1	2	25.87	266		15286.7	1	32
26330	1	5	2.71	0.488	17.8	2	77	3	2	2	27.85	617	0.026	8903.28	2	34
18663	2	1.98	2.12	0.265	17.9	1	71	5	3	1	22.22	404	238	10324	2	23
39244	2	8.8	5.29	0.362	17.9	2	60	1	1	2	29.53	492	0.025	454.562	1	58
44460	2	5.66	4	0.522	17.9	2	75	1	4	2	37.07	739	0.062	1574.94	2	64
44190	2	7.52	0.82	0.367	18	2	71	4	2	2	21.89	379	0.03	2834.71	1	73
12578	2	4.25	2.11	0.514	18.1	1	73	3	5	2	28.84	830	0.011	12617.2	2	19
12067	2	3.98	5.63	0.568	18.2	1	62	1	2	2	28.97	623	0.011	309.351	1	28
36746	2	3.2	10.36	0.614	18.2	2	59	4	4	2	32.09	381	0.473	6978.73	2	53
44285	2	15.58	5.95	1.468	18.2	1	55	4	3	2	30.95	1662	0.969	4207.62	2	68
30052	2	20.81	4.51	0.766	18.3	2	71	3	3	1	36.5	975	0.011	10012.5	1	33
41827	1	4.02	2.1	0.826	18.3	1	78	3	5	2	25.65	676	0.017	6666.68	1	63
10363	2	2.55	2.19	0.436	18.4	2	67	1	2	2	23.97	640	0.011	3057.43	2	17
26871	2	8.83	5.32	0.257	18.4	2	61	1	1	1	35.54	389	0.016	724.149	1	40
26883	2	2.29	2.38	0.204	18.4	1	72	3	3	1	26.7	731	0.351	3697.1	1	33
15139	2	3	2.04	0.34	18.5	2	63	4	2	2	32.72	498	0.145	3228.29	1	16
30423	2	0.75	3.29	0.156	18.7	1	75	4	1	2	35.29	603	0.316	5065.49	2	33
45285	2	4.89	1.82	0.583	18.7	1	66	3	2	2	29	635	1.21	4844.63	1	67
28400	2	3.69	2.23	0.466	18.9	2	75	1	1	1	25.49	523	0.011	1205.46	1	39
33729	2	6.04	3.96	0.683	18.9	2	69	4	3	2	22.16	1151	0.076	4733.93	1	52
16179	1	3.27	1.77	0.338	19	2	85	3	1	1		639	0.018	15763.8	1	23
51237	2	1.78	1.13	0.106	19	2	80	2		2	30.02	406	0.011	1541.51	1	62
20526	1	4.41	2.38	0.766	19.2	1	85	3	3	2	24.04	786	1.51	6985.82	2	22
28288	2	2.3	1.18	0.134	19.2	2	73	1	1	1	40	476	0.027	1452.94	1	34
35352	1	4.19	2.31	0.418	19.2	2	85	4	4	2	22.02	515	0.022	7300.22	2	49
43305	1	2.11	3.88	0.431	19.2	2	77	3	2	1	31.37	429	115	11936.4	1	59
47404	2	9.42	4.19	0.439	19.2	1	50	4	5	2	33.64	914	1.25	10361.8	1	65
13814	2	2.49	2.18	0.216	19.3	2	65	3	3	1	34.2	446	0.025	12776.3	2	20
16808	2	6.49	4.56	0.569	19.3	1	63	3	3	2	25.19	1047	0.028	24187.4	2	22
34988	2	18.86	3.44	0.829	19.3	2	71	4	2	2	37.13	928	0.021	3739.45	1	49
46603	2	3.55	3.29	0.512	19.3	2	73	3	3	1	30.93	508	0.011	9962.9	1	60
28092	2	2.85	1.67	0.229	19.4	1	68	3	1	2	24.33	622	8.91	18752.3	2	34
49899	1	2.17	2.6	0.296	19.5	2	80	3	5	2	26.93	672	0.011	6066.59	1	60
23585	2	6.15	4.3	0.639	19.6	2	79	4	3	2	31.4	472	0.015	4018.45	1	36
41612	1	3.03	2.56	0.581	19.6	2	80	3	2	2	28.65	969	0.011	7857.41	2	60
42985	2	6.53	2.72	0.707	19.6	1	63	3	2	1	25.75	2417	7.37	3558.66	1	59
17202	2	9.16	5.93	0.428	19.8	2	58	3	4	2	26.47	987	0.018	32425	2	23
24126	1	5.53	4.73	0.555	19.8	1	77	1	1	1	25.99	926	0.022	482.68	2	40
19364	2	5.16	3.78	0.768	19.9	2	80	3	3	2	25.1	1001	0.151	2822.44	2	15
47594	1	7.12	2.95	0.864	20.1	1	80	3	5	1	30.48	963	0.07	4009.91	1	63
24571	2	6.27	4.08	0.911	20.3	2	67	4	3	1	28.77	1056	0.032	3429.45	1	42
45953	1	3.8	2.91	0.298	20.3	2	80	4	1	2	18.85	887	0.064	2632.44	1	67
49944	1	7.5	1.85	0.236	20.3	2	63	1	3	1	26.1	303	0.025	3777.38	1	66
42287	2	3.82	2.07	0.487	20.4	2	66	4	4	2	24.83	912	304	2464.4	1	74
43153	1	3.06	1.46	0.103	20.4	1	64	4	1	2	31.98	801	335	4229.86	2	65
38065	2	17.28	3.68	0.794	20.6	1	66	4	2	2	26.92	794	1.09	2166.19	2	49
31603	2	6.94	7.58	0.623	20.7	1	79	3	2	2	29.12	826	0.272	3183.77	1	45
46548	1	4.67	3.89	0.552	20.7	1	80	4	1	1	22.86	748	0.131	2295.14	1	67
42531	2	22.97	9.2	1.162	20.8	2	63	4	5	1		686	0.02	2245.29	1	67
44476	2	3.17	3.4	0.485	20.8	1	80	3	1	2		548	0.276	5049.11	2	59
15691	2	3.87	4.75	0.225	20.9	1	80	4	1	2	22.46	709	0.981	1490.83	1	20
28644	2	3.05	2.77	0.381	20.9	2	85	1	5	2	23.86	591	0.019	1126.26	2	38
35313	2	24.5	6.02	0.748	21	2	76	5	1	2	21.06	864	252	10119.4	2	47
49339	2	8.45	6.5	1.062	21	2	61	2	5	2	22.76	760	90.5	1406.44	1	69
32272	2	4.07	1.68	0.43	21.2	2	83	3	2	2	29.93	737	0.035	5260.01	2	44
35100	2	4.08	2.36	0.425	21.2	2	60	4	1	2	28.82	535	0.023	2618.51	2	52
21702	2	3.86	4.42	0.473	21.4	2	62	3	4	2	35.4	1735	0.011	10098	2	42
35455	2	4.27	3.19	1.043	21.4	2	53	4	5	2	40.65	763	387	12063.7	1	47
37556	2	14.01	5.22	0.519	21.5	1	58	4	4	2	33.02	1132	0.011	7655.84	1	49
10725	2	7.44	2.49	0.73	21.6	2	67	4	2	2	29.73	706	0.07	1700.47	2	25
31506	2	18.66	7.03	0.728	21.7	1	73	3	1	2	25.02	941	0.03	6043.32	2	44
45282	2	4.44	5.41	0.787	21.7	1	74	3	3	2	30.07	1561	426	1570.94	1	61
18879	2	4.81	3.83	1.209	21.9	2	56	3	5	2	20.74	828	0.011	27264.1	2	27
21790	2	4.69	0.97	0.329	21.9	2	61	1	4	2	31.27	401	130	2394.2	2	40
36437	2	4.47	3.66	0.496	21.9	2	50	4	1	2	27.36	1231	0.058	7554.49	1	56
43344	2	4.32	3.74	0.409	21.9	2	59	2	1	1	31.8	513	0.011	2950.84	2	69
26017	1	3.31	1.59	0.276	22	2	83	3	1	2	24.1	859	1.4	10740.6	2	39
51591	2	9.29	4.26	1.263	22	2	80	3	3	2	29.53	1359		4997.95	1	61
16037	2	4.22	2.54	0.28	22.1	1	60	4	5	2		729	0.011	1258.16	2	28
23798	1	2.17	3.92	0.427	22.1	2	83	3	4	2	24.98	614	3.29	5012.44	2	32
15146	2	6.42	4.59	1.075	22.2	1	64	4	4	2	31.28	1242	0.011	3666.62	2	28
25918	1	4.43	1.35	0.265	22.2	2	84	3	1	2	29.12	1059	103	10081.4	1	38
50897	1	6.65	4.08	0.722	22.4	2	67	2	1	2	36.22	1046	0.042	2754.55	2	61
28848	2	4.3	3.84	0.489	22.5	2	54	4	5	2	21	689	0.011	14975	1	39
28044	1	3.47	2.22	0.322	22.7	2	79	3	4	2	26.2	941	0.011	8910.08	2	35
20308	2	14.33	5.29	1.112	22.8	1	71	4	1	2	27.74	861	0.011	4192.55	2	20
38131	2	4.85	4.04	0.75	22.8	2	64	1	1	1	24.41	696	0.04	1004	1	56
42764	2	3.24	1.75	0.187	22.8	2	68	4	2	2	23.56	386	456	4554.4	2	64
16340	2	5.2	5.25	1.154	22.9	1	77	3	5	2	27.43	809	0.011	6192.83	2	19
28291	1	3.68	1.73	0.319	22.9	2	64	3	1	1	27.45	360	61.5	5597.53	1	42
43493	2	8.66	4.07	0.172	22.9	2	60	1	1	2	41.75	397	0.032	2425.53	2	61
49161	2	5.47	1.75	0.793	22.9	1	55	4	1	2	26.29	956	0.387	5137.52	2	61
46526	2	16.31	9.06	0.963	23	2	55	3	4	2	24.39	2149	0.011	44476.9	1	60
51459	2	6.35	2.87	0.624	23	2	72	3	1	2	25.07	1010	0.17	4309.49	2	59
19429	2	3.44	1.34	0.279	23.1	1	78	4	1	2	22.26	498	77.9	899.333	1	20
24871	2	2.78	1.49	0.177	23.1	2	69	4	1	2	28.43	450	0.072	2711.72	2	35
36754	2	3.79	2.61	0.329	23.1	2	50	4	4	2	37.88	1433	0.063	4047.52	2	58
12260	2	8.42	2.74	0.614	23.2	2	78	4	4	2	29.6	720	0.011	2363.23	2	14
51614	2	8.71	1.86	0.502	23.2	1	57	3	4	2	22.63	1674	4.1	3841.22	1	60
14643	2	4.75	2.36	0.418	23.3	2	58	3	3	1	31.78	864	168	11194.3	1	26
24622	1	5.16	2.12	0.361	23.3	1	66	1	2	1	27	975	0.011	2325.85	1	34
46704	2	5.4	2.24	0.432	23.3	1	59	4	3	1	35.16	637	0.011	4494.78	1	59
12702	2	2.75	1.01	0.246	23.4	2	51	4	2	2	32.12	686	274	11114	1	24
46447	2	8.59	2.27	0.398	23.4	2	65	1	1	2	23.15	636	0.032	1060.35	2	71
48531	1	13.35	2.95	0.38	23.4	2	69	4	5	1	24.54	482	0.011	5434.29	2	67
13796	2	3.23	4.08	0.245	23.5	1	71	3	5	2	25.64	1059		11962	2	16
20992	2	6.17	2.41	0.608	23.5	2	61	1	4	2	28.94	574	0.011	457.382	1	17
42298	2	5.96	7.85	0.413	23.5	2	57	1	3	2	23.83	640	0.054	7675.58	2	59
25653	1	2.04	1.24	0.143	23.6	2	68	3	5	2	34.03	335	0.011	5294.26	2	34
22047	2	6.3	3.09	0.59	23.7	2	72	1	3	2	22.93	665	0.025	1499.62	1	34
31636	2	11.45	1.76	0.314	23.7	2	72	4	1	2	33.96	1057	1.91	8341.7	2	49
47361	2	2.18	2.49	0.343	23.8	1	65	4	4	2	25.06	1657	507	3461.14	1	71
18831	1	5.74	5.93	1.607	23.9	2	76	3	4	2		807	0.011	8043.57	2	19
11817	2	3.54	2.47	0.358	24	2	68	1	1	2	29.89	581	0.011	1397.49	2	17
20337	2	5.12	3.09	0.484	24	1	80	4	2	2	27.31	1234		1520.57	2	20
27170	2	3.89	2.31	0.631	24	2	84	3	4	2	27.52	918	0.089	5786.06	1	31
43757	2	5.06	4.8	0.506	24	2	62	1	1	2	29.92	1138	0.011	2877.88	2	66
34625	2	4.19	2.77	0.474	24.1	2	74	4	5	2	36.89	501	7.97	3851.58	1	55
47614	2	3.92	5.67	0.845	24.2	2	75	3	1	2	29.63	1348	0.011	12202.9	2	60
50809	2	12.39	9.49	0.888	24.2	1	80	3	1	2	30.01	845	0.016	3705.38	1	61
21993	1	3.56	4.98	0.266	24.3	1	85	4	1	2	19.12	339	185	4258.64	2	31
25348	1	4.87	2.99	0.411	24.3	1	75	1	1	2	26.22	871	0.029	884.375	1	34
17158	2	4.51	1.95	0.469	24.4	2	62	3	4	2	26.9	1204	213	17783.4	1	24
46716	2	4.79	5.86	0.505	24.4	2	52	4	5	2	30.97	894	0.015	8520.52	2	70
35667	1	3.47	3.71	0.642	24.5	2	73	3	4	1	39.93	629	0.027	20060.7	1	46
41873	1	5.22	2.68	0.982	24.6	2	78	3	3	2	24.31	928		10148.4	2	70
12624	2	4.02	3.35	0.571	24.7	1	70	1	4	2	30.54	722	0.018	582.448	1	17
18962	2	6.58	2.96	0.802	24.8	1	65	4	2	2	20.17	746		838.169	2	26
44594	1	7.92	4.34	0.719	24.8	2	80	3	3	2	24.89	698	0.032	7998.13	2	70
46468	2	4.41	2.64	0.236	24.8	2	60	4	2	2	24.51	643	6.46	2367.72	1	59
48247	2	6.56	5.13	1.123	24.8	1	70	3	2	2	28.56	2158	0.022	9386.07	2	64
23879	2	19.79	7.93	0.591	24.9	2	66	3	4	1	35.66	716	0.124	28904.5	1	37
44904	2	6.45	8.77	0.468	24.9	1	57	4	4	2	30.55	568		4092.95	1	65
12745	2	3.59	1.93	0.403	25	1	75	3	3	1	27.88	482	0.036	7803.34	2	17
15765	1	5.84	6.52	0.481	25	2	85	3	4	2	29.31	959		3797.35	2	19
27286	2	8.6	4.93	0.577	25	2	80	3	3	2		982	0.011	5466.98	2	39
25246	2	11.56	5.65	0.73	25.1	2	55	3	4	2	29.68	627	0.021	12342.9	1	29
37455	1	2.92	2.3	0.228	25.1	1	64	1	2	1	34.99	512	174	11203	2	54
14097	2	5.28	5.94	0.403	25.2	1	50	4	2	1	26.67	576	0.035	12197.8	1	27
29619	2	4.58	3.51	0.547	25.2	2	67	3	3	2	36.97	817	0.016	26013.9	1	38
48322	2	2.36	2.89	0.286	25.2	2	60	4	2	2	22.95	248	240	1965.99	1	68
49026	2	2.49	2.33	0.276	25.2	2	75	3	4	2	42.97	462		13632.5	2	63
25234	2	2.54	2.4	0.298	25.3	1	78	3	2	1	30.83	672	0.139	13097.9	2	33
25384	2	4.69	7.9	0.38	25.3	2	52	4	4	2	27.33	1134	0.217	11752.7	2	33
28656	2	5.62	2.94	0.407	25.3	2	80	1	1	2	25.27	978	0.011	1754.1	1	34
34551	2	5.5	2.57	0.619	25.3	2	73	4	4	2	31.15	893	0.147	2748.83	1	52
45311	1	5.3	6.95	0.339	25.3	1	68	4	2	1	35.34	964	0.068	1687.62	1	59
46333	2	7.27	2.02	0.412	25.3	1	80	3	3	2	29.64	1223	0.029	4744.35	2	59
46885	2	3.32	3.49	0.41	25.3	2	70	1	1	2	37.02	561	0.016	1701.57	1	71
51140	2	3.7	4.8	1.027	25.3	2	60	4	3	1	37.6	1082	0.022	2475.17	1	59
51204	2	11.83	5.18	1.161	25.4	1	55	4	5	1	38.29	1380	0.017	4608.75	2	66
51545	2	3.06	2.64	0.414	25.4	2	65	3	3	2	24.74	509	284	5596.43	2	63
13066	2	3.59	2.47	0.494	25.5	2	66	1	1	2	35.34	627	0.244	3186	2	27
14379	1	11.21	7.51	0.936	25.5	1	85	3	4	2	26.86	1099	0.035	4226.9	1	24
13254	2	5.15	4.02	0.381	25.6	2	62	4	4	2	28.83	1423	0.112	1185.43	2	26
20362	2	2.88	2.43	0.145	25.7	1	55	4	2	2	18.61	512	413	7389.07	1	16
10699	2	48.23	31.77	4.946	25.8	1	60	3	5	1	38.85	1152	0.018	11807.6	2	15
44842	1	3.77	5.44	0.347	25.8	2	73	3	2	2	25.31	959	184	9939.37	2	62
27995	1	4.97	3.3	0.385	25.9	2	65	3	4	1	26.51	1060	0.028	18852.7	1	37
41124	2	4.06	1.98	0.695	25.9	2	68	4	3	1	33.45	634	0.03	4005.82	1	51
45871	2	6.29	4.79	0.706	25.9	1	77	1	1	2	26.31	966	0.011	4529.53	1	66
25604	2	4.88	2.71	0.806	26.1	2	83	3	1	2	18.65	1043	0.022	5711.07	2	34
13260	2	4.55	1.63	0.875	26.2	1	56	2	2	2	25.31	818	0.159	30318.7	2	27
45088	2	3.31	2.5	0.349	26.2	2	73	3	4	2	37.85	644	0.079	12218.9	1	66
26877	2	2.63	1.75	0.369	26.3	2	80	3	1	2	24.07	463	0.07	5393.79	2	34
46955	2	22.36	3.07	0.429	26.3	1	55	3	2	2	24.54	551	0.021	48975.8	1	69
38368	2	5.67	2.27	0.645	26.4	2	60	3	4	2	29.86	649	0.016	25618.2	1	52
17236	2	11.86	5.62	2.323	26.5	1	67	4	5	2	23.56	2260	0.035	1042.53	1	19
17616	2	4.03	2.49	0.389	26.5	2	59	3	5	2	23.78	577	0.011	14504.3	1	14
38780	2	3.14	3.22	0.227	26.5	1	76	4	1	2	23.19	451	1.32	2261.61	2	50
17898	1	10.97	7.95	1.129	26.6	2	85	2	1	2		793	0.02	2854.95	1	17
10142	2	4.82	3.58	0.652	26.7	2	84	4	1	1	35.27	1268	0.081	2214.05	1	16
24839	2	2.8	3.47	0.381	26.7	1	61	4	2	2	29.96	463	0.021	3959.45	2	36
35495	2	3.01	3.09	0.307	26.7	2	76	1	1	2	22.71	632	0.028	10761.5	2	55
46569	2	5.45	6.81	0.496	26.7	2	63	3	3	2	31.63	732	341	5311.49	1	64
10090	2	6.2	4.31	0.607	26.8	2	57	4	4	2	46.69	1671	2.42	5511.57	1	21
17440	2	5.3	5.18	0.629	26.8	1	58	3	2	2	29.63	1056	17.2	4556.18	1	23
34361	1	28.2	23.94	1.301	26.8	2	85	3	1	2	31.56	1041	0.011	3988.32	1	44
35999	2	6.49	3.41	0.529	26.8	2	69	3	1	2	23.76	1534	422	30061.8	2	46
38250	1	3.58	2.59	0.524	26.8	2	85	3	2	2	26.31	786	0.062	20659	1	49
12676	1	3.43	1.78	0.311	26.9	2	85	4	1	2	30.5	576	0.108	3252.99	1	16
41775	2	4.82	5.52	0.838	26.9	2	61	4	2	2	34.75	1356	695	2245.39	1	68
30555	2	9.9	5.67	0.829	27	2	57	3	5	2	21.51	1119	0.011	51260.2	2	36
45889	2	7.83	3.56	0.686	27	2	67	1	2	1	26.72	942	0.031	1204.7	2	64
49799	2	11.67	4.74	0.844	27.1	2	69	3	1	1	27.19	1089	0.205	6172.5	2	59
38450	2	6.7	5.03	0.681	27.2	2	85	1	1	2		1042	0.098	1878.88	1	52
29809	2	9.18	4.72	1.396	27.3	2	73	3	3	2	23.05	1353	311	9506.04	1	33
41735	2	3.09	2.89	0.231	27.3	2	64	3	5	2	25.4	685	0.061	17170.4	2	62
45447	1	8.66	3.49	0.439	27.3	2	75	3	1	2	30.37	930	1.45	4770.62	1	67
26504	2	6.01	3.4	0.555	27.4	1	73	3	1	2	25.3	1236	0.011	16211.5	2	34
27679	2	2.68	1.23	0.244	27.5	1	54	4	1	2	26.2	1058	178	4749.46	2	36
36118	2	3.05	3.72	0.774	27.5	1	73	4	3	1	26.59	711	24.2	2292.91	1	55
40282	2	6.25	2.23	0.503	27.5	2	67	1	3	2	29.13	724	0.019	4075.67	1	55
31898	1	22.03	12.66	2.112	27.6	1	73	3	5	2	24.44	1712	65.2	6127.78	1	48
10254	2	4.81	4.41	0.315	27.7	2	68	3	2	2	36.81	609	0.085	9114.54	1	23
25805	2	19.37	4.68	1.467	27.7	2	82	3	1	2	21.79	1646		4590.87	2	29
31762	1	2.12	2.95	0.247	27.7	2	70	1	1	1	27.37	404	0.011	2345.9	1	56
41496	2	2.85	5.24	0.585	27.7	2	64	1	1	1	28.37	710	0.02	2019.28	1	71
41542	2	4.01	2.68	0.599	27.9	2	60	4	3	1	32.83	988	0.016	4266.65	1	59
46492	1	3.85	2.38	0.412	27.9	2	66	3	5	2	28.49	601	0.023	15838.5	1	60
10528	2	3.27	1.48	0.406	28	2	61	1	2	1	28.93	453		2257.38	1	22
19707	2	7.33	3.06	1.011	28	2	61	1	1	2	31.63	1214	0.021	551.075	1	15
32167	1	5.97	3.8	0.478	28	1	75	3	3	2	38.75	846	0.092	15742.5	1	49
33904	2	3.44	1.6	0.259	28	2	57	3	1	1	40.04	464	0.016	8784.6	2	49
12703	1	4.19	3.89	0.294	28.1	1	85	2	2	2		956	0.035	4349.03	1	25
15799	1	3.88	3.43	0.438	28.1	1	85	1	1	2	28.11	660		572.87	2	28
36690	2	3.47	1.82	0.234	28.1	2	85	3	1	2	21.83	994	0.162	14872.3	2	51
50482	2	2.16	1.76	0.295	28.1	1	80	4	3	1	30.01	680	0.193	2193.19	1	74
51622	2	12.14	4.1	0.587	28.1	2	60	4	1	2	31.53	1328	0.077	4461.13	1	73
40462	1	12.85	3.03	0.649	28.2	2	81	3	4	2	28.64	604	0.011	10799.4	1	50
43438	2	3.41	3.22	0.332	28.2	2	77	3	1	1	30.26	546	201	4123.97	1	61
47363	1	18.74	9.24	0.495	28.2	2	75	2	1	1	40.18	712	0.011	1526.21	2	70
49973	2	16.36	5.12	0.848	28.2	2	64	3	4	2	23.07	1177	0.011	12613.8	2	64
23096	2	6.86	4.33	0.832	28.3	2	85	3	3	2	21.03	1069	0.047	4993.37	2	35
27784	1	14.21	6.71	1.269	28.3	2	72	1	2	2	31.72	1060	0.011	668.764	1	43
41126	2	4.12	3.7	0.828	28.3	1	80	3	1	2	22.73	920	0.046	5177.22	2	46
14096	2	5.4	4.18	0.559	28.4	2	67	1	1	2	37.35	1083	0.029	1699.93	2	27
44275	2	2.85	2.54	0.204	28.5	1	62	4	4	1	21.99	662	537	4123.55	2	61
26342	2	10.24	2.88	0.553	28.6	2	77	5	3	2	25.1	1108	0.034	11886.7	1	42
26434	2	4.59	5.14	0.527	28.7	1	82	3	3	2	22.75	759	0.437	6567.52	2	29
47264	2	3.17	2.76	0.345	28.7	2	80	3	2	2	22.58	1182	0.019	7578.09	2	60
10682	2	12.19	2.61	1.236	28.8	1	62	4	4	2	30.15	989	0.035	4050.12	1	25
12913	1	10.25	8.68	0.665	28.8	2	84	3	2	2		823	0.011	9248.27	2	19
31039	2	7.1	6.42	1.058	28.8	2	65	4	4	2	23.12	1206	0.06	3404.1	1	41
20045	2	3.78	1.24	0.359	28.9	2	69	1	1	2	24.12	398	0.117	3083.17	2	27
29079	2	3.63	3.33	0.342	28.9	2	85	1	1	1	26.33	561	0.04	973.748	1	34
36957	2	4.99	3.36	0.43	28.9	2	72	4	1	2	32.97	862	0.016	3059.68	1	50
37518	2	5.51	4.59	1.176	28.9	2	63	3	5	2	38.44	868	0.015	42982.6	2	46
42869	2	3.52	3.86	0.285	28.9	2	64	3	3	2	29.28	1187	256	5604.52	1	67
50638	2	3.7	2.91	0.379	29	2	66	1	1	2	35.07	653	0.108	982.787	1	59
14958	2	7.76	4.68	0.566	29.1	2	67	1	1	2	24.03	618	351	956.422	2	27
44055	1	4.32	4.21	0.544	29.1	2	80	3	1	2	33.49	815	0.011	11826.2	2	62
44600	2	1.85	1.41	0.276	29.1	1	62	4	5	2	22.75	934	0.887	1702.1	2	67
46275	1	4.83	2.5	0.417	29.1	2	73	4	3	1	29.36	732	0.656	3468.16	2	66
42873	1	4.8	2.89	0.583	29.2	2	80	5	1	2	31.97	665	0.083	5046.49	1	62
44614	2	3.61	2.54	0.275	29.2	2	62	4	2	2	26.01	858	412	1734.33	1	67
47778	1	3.49	2.95	0.212	29.2	2	67	3	2	1	31.54	469	439	8921.72	2	62
13795	2	6.72	5.66	0.399	29.3	2	57	4	4	1	24.88	634	0.035	5530.74	1	27
31079	2	14.87	4.74	0.431	29.3	1	64	1	2	2	32.28	977	0.236	1405.5	1	41
42981	2	5.07	5.95	0.605	29.3	2	65	1	2	2	28.62	835	0.099	1566.78	1	71
48796	2	12.14	4.53	0.873	29.3	2	77	3	2	2	31.9	792	0.011	5967.8	2	66
15185	2	3.08	1.59	0.197	29.4	2	58	4	2	1	21.02	497	162	16795.9	1	15
19883	2	2.32	1.62	0.184	29.4	2	65	4	2	2	28.77	369	2.75	12596.1	2	22
14604	2	5.33	2.38	0.363	29.5	2	50	4	4	2	27.45	764	0.113	8709.53	2	15
17877	2	9.28	5.4	0.597	29.5	1	79	3	4	2	24.85	989	0.016	6470.18	1	19
35324	2	5.38	6.41	0.416	29.5	1	76	3	3	2	32.79	672	184	12849.5	2	44
48277	2	8.53	6.66	1.132	29.5	1	67	4	2	2	34.74	1486	0.061	2033.63	1	71
45477	2	8.48	3.95	0.821	29.6	1	56	2	2	1	43.02	484	0.024	8007.07	1	69
29191	2	19.56	13.26	1.389	29.7	1	61	3	2	2	23.7	1245	180	4211.13	2	34
10720	2	3.53	0.93	0.24	29.8	1	67	3	3	2	34.5	822	380	10275.9	1	19
34477	2	12.49	10.97	0.728	29.8	2	70	1	5	2	26.44	989	0.073	1241.5	1	48
42795	2	5.17	2.24	0.398	29.8	2	76	4	3	1	24.51	612		2952.54	1	59
22253	2	19.78	4.63	1.004	29.9	1	78	3	4	2	33.64	1522	0.034	12913.8	1	33
22254	2	3.27	1.62	0.188	30	2	58	3	1	1	29.02	391	4.95	18979.4	2	34
21391	2	13.7	4.69	1.258	30.1	1	77	1	1	2	29.72	1246	0.38	1102.51	1	34
51394	2	5.16	4.94	0.874	30.2	1	61	3	2	2	33.35	1035	0.073	12378.1	2	59
20796	2	11.16	4.44	0.555	30.3	2	74	4	3	1	29.25	888	0.071	1575.53	1	27
27700	2	5.34	1.86	0.578	30.3	2	72	3	3	2	24.87	542	156	6631.71	2	30
31114	2	9.5	7.87	1.504	30.3	2	55	3	2	2	21.28	1498	0.218	23757.5	2	31
31274	2	5.98	4.67	0.859	30.3	1	56	3	3	2		1479	258	38051	1	53
35564	2	5.44	5.74	0.335	30.3	2	66	3	2	2	33.15	845	284	43782.2	1	50
24739	2	11.68	4.19	0.531	30.4	1	71	3	5	2	29.28	1431	0.086	7652.84	1	41
42444	2	5.37	5.66	0.365	30.4	2	68	3	3	2	26.37	1100	0.011	11458.6	1	60
51417	2	4.78	2.43	0.841	30.4	2	80	3	2	1	36.57	961		9137.64	1	65
16355	2	3.71	3.45	0.33	30.5	2	72	1	1	2	30.92	802	0.019	1340.51	1	28
12023	2	32.23	4.17	1.253	30.6	2	65	2	5	2	22.36	1656	0.09	8007.87	1	23
26726	2	6.05	4.1	0.322	30.6	2	68	3	3	2	21.27	1155	0.11	9769.44	2	31
26806	2	12.14	5.74	0.6	30.6	2	71	3	1	2	23.49	762	0.015	13657.5	1	30
29052	2	8.58	7.35	0.527	30.6	2	65	1	1	2	32.9	922		656.67	1	34
48098	2	10.67	4.58	0.47	30.6	2	80	1		2	24.08	1119	0.02	2781.34	2	69
14694	2	17.88	5.65	0.715	30.7	1	75	3	4	2	25.63	1270	0.011	8526.58	1	17
45425	2	6.3	4.72	0.574	30.7	2	77	4	3	2	29.42	758	0.022	3155.2	1	68
45939	1	5.08	4.61	0.619	30.7	2	80	3	4	2	29.93	1648	0.011	9657.22	2	60
22822	2	4.5	3.65	0.276	30.8	2	72	1	2	2	28.15	660	281	2782.82	1	34
27064	2	4.62	3.93	0.548	30.8	2	63	4	5	2	36.89	971	0.05	5986.63	2	39
28757	2	8.8	9.91	1.085	30.8	1	56	3	5	2	36.77	806	0.011	18553	1	38
31663	2	7.82	6.05	0.544	30.8	1	76	3	3	2	30.27	1453	0.025	4089.88	2	53
33796	1	3.84	6.9	0.827	30.8	2	81	3	4	2	27.99	1051	0.022	11222.9	1	46
43115	1	8.31	9.45	0.817	30.8	2	80	3	5	2	23.18	825	0.025	7321.24	1	63
49489	2	4.53	2.89	0.626	30.8	2	55	3	3	2	29.28	800	0.042	68228.4	2	63
43526	2	4.92	2.75	0.242	30.9	1	72	2	2	2	21.58	852	0.026	2331.92	1	72
15300	1	4.96	2.73	0.398	31.1	2	85	3	3	2	20.12	723	0.035	7589.51	1	27
20657	1	7.08	3.96	0.629	31.1	2	72	3	3	2		1250	185	12832.8	2	14
26047	2	4.95	2.91	0.416	31.1	1	58	3	1	2	20.97	913	0.011	7967.62	2	34
28500	1	5.12	4.46	0.341	31.1	2	75	3	3	2	43.5	658	0.341	11352.3	2	32
11485	2	7.41	2.74	0.793	31.2	2	66	3	1	2	24.01	934	220	15319.4	2	20
11789	1	10.85	3.16	0.634	31.2	2	79	3	2	2	23.4	1039	0.024	14431.5	2	19
18811	2	9.01	4.9	0.83	31.2	2	82	3	1	1	29.64	979	0.018	6472.76	2	21
45099	1	3.38	2.28	0.576	31.2	2	70	4	3	2	35.52	366	0.257	2906.95	1	59
14347	1	11.98	6.06	1.026	31.3	2	62	4	2	2	24.52	1352	570	5271.71	1	25
39181	1	6.65	3.31	0.559	31.3	2	81	3	3	2	21.47	1060	0.011	12076.9	2	53
47771	2	10.58	8.6	0.637	31.3	2	79	3	2	2	22.71	1256	0.011	9569.64	2	60
49122	1	4.54	6	0.396	31.3	2	80	4	2	2	14.86	758		5237.08	2	68
17488	1	5.33	4.1	0.368	31.4	1	82	4	1	2	27.55	700	148	1385.05	1	19
32629	2	5.2	4.8	0.468	31.4	2	71	3	3	2	22.01	703	0.011	9679.54	2	47
25161	1	4.46	4.31	0.667	31.5	2	68	3	1	2	30.97	684	0.011	15760.1	1	29
46819	2	5.61	3.37	0.439	31.5	2	58	1	1	1	41.17	875	0.021	2328.39	1	66
16529	2	4.92	3.12	0.504	31.7	2	76	3	3	2	25.36	929	0.011	18783.2	2	19
18189	2	3.41	5.43	0.513	31.7	1	66	4	1	2	17.65	1167	449	2041.72	1	21
42578	2	3.71	2.44	0.495	31.7	2	69	4	1	1	31.84	465	0.011	3350.82	1	62
18182	2	3.69	3.02	0.542	31.8	2	64	3	4	1	25.09	1066	0.059	21463.6	2	14
20754	2	6.98	3.55	0.783	31.8	2	74	4	2	2	33.33	920	799	3455.37	1	25
30766	2	3.77	2.3	0.657	31.8	2	70	3	1	2	36.96	782	0.021	11529.6	1	30
32042	2	11.55	7.96	1.28	31.8	2	66	4	2	2	23.47	1243	0.011	4310.96	2	52
48974	2	2.69	2.86	0.508	31.8	2	57	4	3	1	34.23	602	0.011	4079.04	2	60
12376	2	6.35	5.12	0.497	31.9	2	61	1	1	1	25.83	634	0.011	612.885	1	22
25099	2	4.33	6.48	0.503	31.9	1	64	1	1	2	36.72	868	0.011	660.431	1	40
25489	2	7.57	4.47	0.881	32	2	74	1	1	1	29.22	1225	0.015	1016.59	2	42
35216	1	5.1	5.41	0.377	32	2	71	3	2	1	27.13	850	0.011	10094.1	2	44
17930	2	14.38	5.38	0.587	32.1	1	77	3	5	2	30.57	1090	0.027	11142.4	1	19
27294	2	9.45	6.71	0.961	32.1	2	66	3	4	1	42.07	1861	0.096	14446	2	34
29639	2	5.5	4.66	0.641	32.1	2	60	4	2	2	34.89	1104	0.136	2371.24	2	32
26343	1	11.53	5.95	0.486	32.2	2	79	4	2	1	27.91	752	0.032	4258.72	1	35
33337	2	3.57	2.75	0.305	32.3	2	68	4	1	1	37.14	472	0.545	1433.76	2	49
36732	1	5.78	5.92	0.919	32.3	2	72	3	4	2	20.82	1060	0.011	13952.7	2	52
16758	2	5.89	3.88	0.858	32.4	2	65	1	1	2	36.01	992	0.683	515.234	1	15
28948	2	7.07	4.09	0.541	32.4	2	58	1	1	2	31.41	1200	0.021	7983.82	2	40
30297	2	4.31	2.69	0.551	32.4	1	64	3	4	2	34.01	788	0.099	20472.1	1	38
30829	2	6.02	5.66	0.553	32.4	1	64	3	1	2	29.46	735	0.016	19030.4	2	33
48561	1	4.19	2.61	0.306	32.4	2	78	3	2	1	40.24	415	0.082	11189.9	2	59
49723	1	5.2	2.77	0.448	32.4	1	70	3	5	1		669	0.088	10920.1	1	67
33871	2	6.96	3.79	0.483	32.5	2	62	4	2	2	31.75	1205	0.249	2223.49	2	45
46203	1	6.4	4.86	1.13	32.5	2	64	4	4	1	29.15	1065	283	2424.62	2	68
47191	2	8.43	4.12	0.285	32.5	1	66	3	1	2	31.76	1528	3.47	5078.9	1	67
11672	2	3.57	4.31	0.467	32.6	2	71	3	2	1	33.99	506	0.011	8867.86	2	19
22569	2	11.44	6.33	1	32.6	1	83	3	4	2	26.42	815	0.011	3887.25	2	30
22845	1	6.29	5.95	0.832	32.6	2	79	3	5	2	25.43	1378	0.133	5717.41	2	43
36237	1	12.24	2.57	0.354	32.6	1	82	3	1	2		840	0.031	3856.35	2	46
11751	2	4.45	4.67	0.66	32.7	1	72	1	1	2	26.95	1427	0.011	890.053	1	15
12651	2	21.99	18.45	0.531	32.7	2	60	5	3	1	23.76	824	0.011	7038.18	1	16
17129	2	3.58	3.25	0.462	32.7	1	76	3	4	2	26.96	713	0.011	5486.48	1	17
18359	2	8.81	6.25	0.995	32.7	2	61	3	5	2	25.2	1117	0.072	18426.6	1	19
40658	2	21.33	7.27	1.135	32.7	2	69	3	4	2	20.69	1471	0.011	12308.4	1	55
14981	2	4.03	3.72	0.435	32.8	2	66	4	2	2	35.07	747		1985.82	1	16
23914	1	5.15	3.03	0.479	32.8	2	81	3	2	2	29.06	921	0.192	5393.79	2	34
30141	2	5.6	4.08	0.613	32.8	2	73	3	5	2	20.38	890	0.011	11065.1	1	35
36036	2	10.14	8.09	0.7	32.8	2	55	1	2	2	31.45	1006	0.469	2065.06	1	55
44531	1	2.24	2.83	0.447	32.8	1	79	4	1	2	30.03	536		6103.89	2	66
51411	1	5.11	3.29	0.506	32.8	2	80	3	3	2	31.29	766	0.023	13413.5	1	63
13751	2	5.9	5.75	0.641	32.9	2	71	1	4	1	36.49	562	6.99	1868.33	1	17
15156	2	10.34	5.38	0.837	32.9	2	83	3	1	2	28.38	1102	888	7815.26	1	27
43244	2	9.44	6.08	0.281	32.9	2	77	4	1	2	30.56	744		2786.41	2	67
44295	2	13.44	8.46	0.881	32.9	2	65	3	1	1	28.19	1442	0.02	14145.8	1	67
47086	2	3.55	4.42	0.382	32.9	1	80	4	3	2	34.94	601	0.019	2256.05	1	65
50303	2	13.27	12.08	0.809	32.9	2	65	3	3	2	20.74	1017	0.011	5439.23	1	60
51124	2	5.49	7.97	0.754	32.9	1	63	1	1	2	29.76	1250	0.021	1901.56	1	66
51473	2	8.12	2.67	0.448	32.9	2	75	3	2	2	29.56	1108	3.32	11074.2	2	59
13672	2	5.12	5.73	0.463	33	1	58	3	4	2	32.53	1381	0.035	8994.78	1	21
24334	1	24.52	19.34	0.932	33	2	79	4	5	1	31.42	1182	0.042	7228.21	1	41
31334	2	6.14	3.9	0.48	33	2	55	4	5	2	43	1520	0.011	7563.86	1	56
20907	2	8.32	4.7	0.779	33.2	2	67	3	3	2	44.02	896	0.048	21331.3	1	27
38739	2	6.49	7.07	1.476	33.2	2	55	3	5	2	30.16	809	0.187	27262.9	2	44
44916	2	4.45	3.01	0.471	33.2	2	71	4	2	2	46.01	652	0.979	5566.99	2	68
13471	1	15.87	5.4	0.543	33.3	2	76	3	4	1	28.94	868	0.011	16865.1	2	19
13875	1	8.28	6.36	0.867	33.3	2	85	3	3	2		1248	0.018	3784.7	2	25
14285	2	6.14	3.97	0.73	33.3	2	60	1	1	2	29.75	904	0.03	1319.75	2	25
17621	2	9.28	5.6	0.653	33.3	1	62	2	1	2	20.69	955	434	2689.58	2	14
22994	2	6.46	6.22	0.911	33.3	1	68	3	3	2	29.83	2244	60.6	9411.98	1	38
23439	2	4.8	3.1	0.537	33.3	2	69	2	1	1	22.25	804	0.024	15992.5	1	43
35551	1	15.79	3.63	0.35	33.3	2	80	3	2	2	34.6	831	545	4654.07	1	52
41076	2	11.08	2.8	0.506	33.3	2	85	4	3	1	30.9	1026	0.148	7300.22	2	49
23998	2	10.37	7.95	0.583	33.4	2	85	3	3	2	26.23	1213	0.02	7519.07	1	40
35221	2	8.31	4.69	0.709	33.4	2	61	1	1	1	27.7	907	0.035	8600.77	2	51
40249	2	5.07	5.05	0.856	33.5	2	58	3	5	2	28.15	965	0.011	17834	1	55
43761	2	5.36	4.26	0.723	33.5	1	60	4	2	2	27.02	1099	0.011	3245.22	1	72
45553	1	10.88	9.92	0.702	33.5	2	68	3	4	2	22.75	1409	0.02	7364.67	2	66
50528	1	12.65	4.53	0.54	33.5	2	80	3	3	2	23.82	1009	0.011	7859.52	2	62
18138	2	16.62	6.85	1.015	33.6	1	85	3	4	2	24.96	1518	0.011	2464.91	2	19
29338	2	1.28	1.1	0.199	33.6	1	53	4	2	2	22.35	671	70.2	3509.8	1	36
17758	1	15.71	14.56	0.596	33.7	2	85	4	3	2	23.96	1133	0.035	3635.85	1	18
42026	2	2.66	3.68	0.561	33.7	1	71	3	1	2	35.84	596	0.134	7764.96	1	62
50152	2	4.65	5.37	0.652	33.7	2	68	4	4	1	20.31	1222		2690.62	2	67
23375	1	11.15	5.53	1.182	33.8	1	75	3	3	2	31.45	1632	0.011	10548.4	1	35
24475	2	3.41	2.73	0.4	33.8	1	80	3	3	2	22.68	645	31.8	8469.97	2	42
42102	2	23.3	2.8	0.539	33.8	2	58	4	2	2	33.63	1153		3713.65	2	67
47809	2	6.08	7.89	0.632	33.8	2	63	4	4	1	36.98	1141	1.11	3853.75	2	64
48070	2	4.43	3.87	0.686	33.8	2	67	1	2	1	24.91	688	0.011	3271.1	2	72
11572	1	5.47	5.83	0.639	33.9	2	85	1	1	1	27.45	966	0.011	1302.62	2	15
23519	2	6.88	8.78	1.056	33.9	1	67	3	4	2	32.34	1161	0.063	7277.59	1	29
32099	2	6.3	5.66	1.34	33.9	1	65	4	2	2	36.47	1682	387	2391.79	1	50
50265	1	6.16	3.79	0.653	33.9	2	71	5	2	2	30.32	843		5551.04	2	69
45059	2	14.15	3.4	0.335	34	1	77	2	2	2	19.3	1152	0.256	1616.75	2	60
50340	1	6.43	6.81	0.565	34	2	68	5	1	1	21.18	992	285	21626.8	2	71
30078	1	5.29	2.74	0.918	34.1	2	82	3	5	2	33.24	807	0.011	6122.4	2	34
47821	2	6.94	9.79	0.438	34.1	2	80	2	1	1	30.82	1204	0.011	3143.36	1	62
48740	2	3.28	3.2	0.202	34.1	2	64	4	2	2	26.66	672	242	2887.31	1	59
30370	2	5.73	3.18	0.491	34.2	2	78	1	2	2	35.7	648	0.011	1220.15	1	40
33331	2	5.25	5.42	0.666	34.2	2	56	4	2	2	38.45	1526	185	11541	1	56
38060	2	4.82	7.13	0.607	34.2	2	69	4	2	1	27.63	1205	0.244	3734.14	1	53
14939	2	6.66	5.87	0.917	34.3	2	60	3	2	2	31.2	1479	198	15963.5	1	23
28019	2	8.85	5.82	0.559	34.3	2	78	3	3	2	22.27	648	0.011	7280.85	2	30
35617	2	11.79	3.4	0.741	34.3	2	81	1	3	2	32.26	865	0.04	8906.48	1	57
11420	2	5.07	2.84	0.54	34.4	2	50	4	5	2	32.33	1660	0.076	3163.38	1	14
14967	1	6.87	3.01	0.445	34.4	2	82	4	1	2	20.3	874	459	2214.05	1	16
44069	1	9.35	5.86	0.473	34.4	2	76	4	3	2	32.29	738	0.016	5481.45	1	68
25575	2	2.34	3.27	0.613	34.5	2	57	3	4	2	24.12	580	0.011	19442	2	32
41127	2	7.18	9.29	0.668	34.5	2	70	4	2	1	31.44	783	249	9024.34	2	53
45119	1	10.4	5.35	0.54	34.5	2	72	3	4	2	23.67	1038	0.017	7857.14	1	60
51282	1	8.23	10.71	0.509	34.5	1	69	2	1	1	35.64	771	0.236	1463.48	2	61
21281	2	5.54	4.13	0.627	34.6	2	64	1	1	1	30.56	742	0.027	519.102	2	40
27262	2	18.3	17.58	2.428	34.6	2	55	4	3	2	28.75	1843	0.037	11222.6	1	30
28907	2	7.87	4.27	0.946	34.6	1	81	3	5	2	27.69	1404	0.016	4603.53	1	39
43498	2	10.27	3.79	5.9	34.6	1	78	2	1	2	27.46	568	0.021	3339.34	1	60
44746	2	7.37	3.88	0.669	34.6	2	53	4	3	2	31.79	1338		4387.92	1	73
45968	2	9.43	3.88	0.626	34.7	2	69	4	3	1	37.82	769	0.074	2518.32	1	59
22346	1	5.04	3.5	0.518	34.8	2	85	3	5	2	27.79	752	0.011	4863.12	2	39
39538	2	11.82	3.32	0.534	34.8	2	60	3	5	2	42.34	687	0.011	21775	2	44
12708	2	6.49	2.62	0.808	34.9	2	85	3	2	2	26.87	1147	0.035	7567.2	2	19
17734	2	22.66	16.46	0.731	34.9	2	64	3	2	2	36.76	1290	0.864	13272.7	1	14
25354	1	11.3	5.61	0.846	34.9	1	80	3	5	2	28.04	1291	0.037	5363.53	2	37
16285	1	20.6	13.62	1.842	35	2	80	3	3	2	27.94	2440	0.022	6626.76	1	23
30449	1	11.84	7.14	1.166	35	2	76	4	4	2	35.46	1096	0.043	6107.07	2	41
11838	1	4.06	6.83	0.474	35.1	2	65	3	3	2	29.33	941	0.011	7929.35	1	19
16125	2	4.85	3	0.492	35.1	2	82	3	3	2	26.33	1018	0.011	4778.75	1	17
32666	1	6.7	2.34	0.541	35.1	1	85	3	3	2	27.27	1107	0.025	7029.5	2	49
47636	2	5.22	3.92	0.393	35.1	1	74	1	1	1	34.51	688	0.03	1651.86	1	60
49815	2	9.6	2.42	0.442	35.1	2	78	3	1	2	31.6	968	0.016	4638.93	2	62
11797	2	3.65	5.56	1.022	35.2	1	64	1	2	2	26.8	1401	0.078	467.296	2	15
21185	2	28.11	23.65	0.491	35.2	1	61	3	5	2	29.26	827	0.023	8069.95	2	30
25135	2	5	3.37	1.017	35.2	1	68	1	1	1	33.34	1388	0.011	2050.56	2	38
20531	1	5.49	5.32	0.49	35.4	2	75	2	1	2	21.76	878	0.186	13340.3	2	28
23792	1	4.58	5.81	0.397	35.4	2	76	1	1	1	31.89	877	0.106	1157.05	1	38
24892	1	7.43	4.91	1.832	35.4	1	70	1	1	1	28.7	1610	0.011	942.732	2	38
32952	1	7.15	5.76	0.821	35.4	2	76	3	5	2	13.36	1564	0.011	14142.4	2	52
11233	1	6.85	3.35	0.348	35.5	2	81	3	3	2		668		4163.96	2	27
50275	2	9.35	8.25	0.486	35.5	2	62	5	2	1	27.5	1118	0.016	4468.7	1	73
27937	2	12.21	10.79	0.598	35.6	2	55	3	4	2	21.83	993	221	19442	2	32
49040	2	8.32	6.72	0.935	35.6	1	62	3	5	2	32.83	1649	0.011	7444.19	2	69
18200	2	5.1	3.37	0.312	35.7	1	78	4	1	2		948	157	2413.88	1	27
18741	2	9.66	7.25	3.308	35.7	1	80	3	1	2	28.41	1648	0.027	3470.83	2	23
23188	2	3.86	3.13	0.412	35.7	2	56	3	3	2	17.97	788	151	33453.5	2	32
41021	2	3.15	4.11	0.431	35.7	1	66	2	2	2	28.19	540	0.057	7606.86	1	58
27834	2	8.67	5.16	0.952	35.8	2	70	1	3	2	22.74	1282	0.066	782.544	1	34
13519	2	9.88	4.81	1.296	35.9	2	63	5	5	2	33.9	1285	0.011	2638.3	2	21
10323	1	6.26	2.2	0.751	36	2	74	4	1	1	30.74	727	0.662	12032.2	1	24
14999	2	7.38	2.45	0.792	36	2	60	3	3	1	40.39	876	287	8223.12	1	20
21173	2	13.45	9.65	0.664	36	2	69	4	1	1	25.32	936	0.011	1716.99	1	35
22719	2	4.14	3.44	0.356	36	1	69	5	4	2	21.48	1779	381	3004.16	1	37
23457	1	5.34	3.21	0.455	36	2	72	1	1	1	26.34	825	0.011	1379.39	2	38
26032	1	7.66	6.53	1.174	36	2	85	3	5	2	31.57	1355	0.119	9043.94	2	32
26511	2	5.87	5.54	0.794	36	2	81	3	2	1		947	0.039	5765.58	1	29
12442	2	7.83	7.46	0.583	36.1	2	74	1	1	2	35.9	892	0.054	632.373	1	28
46322	2	14.63	7.31	1.274	36.1	2	80	3	5	2	20.65	1643	0.011	9829.72	1	70
46940	1	3.83	3.41	0.398	36.1	1	62	1	1	1	26.33	724	0.011	2729.11	2	61
50780	2	5.14	5.08	0.924	36.1	1	59	4	3	2	30.83	1652	0.389	3655.38	1	65
51457	1	4.6	2.65	0.391	36.1	2	69	1	1	1	33.63	374		1582.11	1	65
42041	2	9.94	4.36	1.026	36.2	1	80	3	1	2	22.62	761	0.069	2813.71	2	70
44508	2	2.45	3.3	0.332	36.2	2	80	4	1	1	47	537	0.152	4554.59	1	64
15322	2	9.66	6.74	1.253	36.3	1	76	3	4	2	32.27	1608	43.5	4964.94	2	26
27386	2	3.84	2.46	0.322	36.3	2	64	1	3	2	29.64	749	376	402.177	2	40
34167	1	10.05	5.85	0.944	36.3	2	81	3	1	2	29.01	1111	0.038	13598	2	49
44661	2	14.38	2.51	0.616	36.3	2	60	3	4	2	34.2	689	0.021	7665.04	2	71
47851	1	26.11	22.02	1.254	36.3	2	80	3	1	1	25.75	1332	0.176	13483.8	2	60
48668	2	5.51	7.33	0.506	36.3	2	80	3	3	2	27.31	845	0.017	6195.22	1	61
43296	2	22.82	7.48	0.974	36.4	2	65	3	3	2	21.4	1404	1.51	17445.6	1	64
12610	1	5.69	7.93	0.401	36.6	2	70	3	2	2	29.95	806	0.011	7318.28	2	19
24932	1	7.54	3.13	0.447	36.6	2	85	3	1	2	23.56	708	0.137	4122.03	2	33
26530	1	8.16	9.35	0.62	36.6	1	85	2	1	2	21.42	824	0.025	4300.83	2	35
29090	2	5.32	3.15	0.522	36.6	2	60	4	3	2	30.84	804	0.028	5733.44	1	42
11826	2	4.68	4.18	0.477	36.7	2	69	4	2	2	35.95	1208	403	1881.16	1	27
40211	2	8.44	5.37	0.782	36.7	2	62	3	2	2	41.21	1886	404	12739	2	58
51227	2	7.42	5.44	1.312	36.7	2	56	2	2	2	29.44	1008	0.046	1297.08	2	69
32540	2	6.18	7.72	0.734	36.8	2	60	4	2	2	33.84	1048	0.088	4861.78	2	51
38352	2	11.8	5.24	0.835	36.8	2	73	3	3	1	30.45	968	0.072	23870	1	49
39785	1	4.61	3.56	0.443	36.8	2	71	3	3	2	25.07	1178	293	22075.6	1	48
48641	2	10.53	3.19	0.568	36.8	1	80	3	1	2	27.86	1086	0.059	2479.61	2	59
18718	2	17.02	8	1.359	36.9	1	76	4	4	2	27.47	1723	0.026	9005.52	2	25
13048	2	14.7	6.53	0.651	37	2	83	3	4	2	18.02	1195	92.5	6268.18	2	21
36100	2	6.98	4.82	0.235	37	2	80	3	3	2	29.6	523	0.119	9519.62	2	47
39853	2	7.71	3.89	0.634	37.1	2	63	3	4	2	31.05	1353	0.032	12073.4	2	50
43301	2	9.05	8.21	0.784	37.1	2	66	1	1	1	32	1374	0.011	937.165	1	65
15902	2	10.79	6.58	1.58	37.2	2	57	3	5	2	24.59	951	0.039	13114.8	2	21
18071	1	6.91	2.95	0.529	37.2	2	83	3	1	2	24.81	449	0.035	3634.91	1	26
26878	2	26.69	3.09	0.769	37.2	1	76	3	5	2	29.41	1786	0.011	5488.26	1	34
42340	2	4.45	6.98	0.313	37.2	2	60	1	1	2	32.35	702	0.015	1824.46	1	66
45801	2	4.42	5.59	0.621	37.2	2	80	2	1	2	27.07	633		1970.87	1	62
45992	2	7.23	4.13	0.744	37.2	2	75	3	1	2	41.91	994	0.243	7305.51	2	59
49067	2	8.06	5.96	1.004	37.2	2	60	4	2	1	33.81	1238	0.071	1889.49	2	64
30597	2	6.63	5.69	0.59	37.3	1	65	4	2	2	30.2	445	144	3377.12	2	42
32140	2	10.04	3.55	1.085	37.3	2	69	4	4	2	33.23	1271	0.095	2392.58	1	51
34427	2	11.45	2.54	0.682	37.3	2	74	1	1	2	26.86	841	0.011	6118.72	1	58
38285	1	10.78	7.57	0.802	37.3	2	81	3	4	2	25.16	886	0.042	10380.2	1	50
23744	2	10.09	2.66	0.527	37.4	1	85	4	1	2	21.02	1425	0.137	2829.42	1	35
24917	2	5.37	5.19	0.64	37.4	2	83	3	4	2	30.14	649	0.016	3989.05	1	40
25875	1	7.58	3.09	0.649	37.4	2	69	3	2	1	40.77	1364	550	5020.08	2	37
41772	2	9.76	5.06	0.714	37.4	1	69	2	2	2	25.95	820	0.068	3799.45	2	61
19743	2	7.61	7.85	0.949	37.5	2	56	1	3	2	25.38	1055	233	2039.64	2	27
31765	2	11.4	6.19	1.365	37.5	1	70	3	4	2	35.24	2636	1.07	8854.76	2	56
47394	1	12.94	3.03	0.568	37.5	1	80	3	1	2	22.89	962	0.328	2606.18	1	67
18361	1	10.9	5.98	0.798	37.6	2	85	3	1	2		1357	0.046	6744.52	1	23
22062	2	2.58	2.56	0.232	37.6	1	57	3	2	2	23.96	925	357	7967.62	2	34
24180	1	6.12	5.73	0.589	37.6	1	60	3	3	2	22.5	1975	326	25156.2	2	42
25864	1	5.93	5.42	0.954	37.6	2	81	3	2	2	27.49	1049	0.011	5044.86	2	35
29370	2	23.17	19.02	0.509	37.6	1	75	3	5	2	27.55	915	31.2	4821.84	1	41
41694	2	11.86	9.25	0.939	37.6	2	60	2	4	2	26.06	1891	0.061	2216.69	2	61
45078	1	5.49	5.27	0.499	37.6	1	78	3	4	2	24.38	894	0.038	14065.5	2	59
47277	1	4.54	3.48	0.357	37.6	1	75	3	1	2	29.37	1179	290	3520.58	2	60
24662	2	10.29	7.99	0.733	37.7	2	63	3	2	2	32.36	1991	0.027	8934.63	2	37
39796	2	7.15	6.52	0.292	37.7	2	61	3	2	2	36.48	1090	418	10475.7	2	49
14137	2	5.88	6.28	0.464	37.8	1	85	3	5	2	25.33	634	0.021	4025.75	2	25
17694	2	9.79	4.25	0.828	37.8	2	64	2	4	2	30.53	798	0.297	17974.4	1	24
19207	2	4.08	1.92	0.388	37.8	1	71	4	3	2	29.37	1726	0.725	3379.51	1	24
20793	2	6.75	4.41	0.971	37.8	1	85	3	1	1		1437		4097.36	1	23
21562	2	6.41	2.99	0.323	37.8	2	66	2	1	2	31.78	921	0.016	4347.27	1	43
23308	2	7.08	6.56	1.241	37.8	1	68	1	3	2	27.32	1389	0.011	571.662	1	34
33001	2	3.52	3.49	0.305	37.8	1	82	3	3	1	21.18	629	159	2965.45	1	45
43550	2	4.68	5.51	0.365	37.8	1	74	4	4	2	40.41	1335	0.677	3794.47	2	66
12256	2	8.51	6.55	1.319	37.9	2	71	3	3	2	30.79	1182	0.011	11103.3	1	22
22454	1	6.08	4.95	0.61	37.9	2	85	3	3	2	18.44	1370	0.011	9266.57	1	35
22573	1	9.5	6.6	1.034	37.9	2	85	3	4	2	26.03	1718	0.017	7115	1	29
28986	2	6.11	6.76	0.793	37.9	2	65	3	3	2	22.34	1156	195	26864.8	1	29
42656	2	18.47	6.56	0.751	37.9	2	55	1	3	2	35.94	1214	0.024	3646.9	2	71
42866	1	8.06	10.4	0.991	37.9	2	80	3	2	2	38.47	1591	0.097	8053.32	2	63
43036	2	5.96	4.39	0.728	37.9	2	56	4	4	2	64.8	945	2.34	8351.16	1	64
36197	2	5.98	7.23	0.581	38	2	60	4	2	2	26.45	863	571	4809.45	2	51
37977	2	4.42	4.37	0.32	38	1	73	2	1	2	32.92	717	0.035	1414.82	2	56
10936	2	6.91	2.32	0.778	38.1	2	77	1	3	2	30.99	1248	0.021	1663.06	1	28
15694	2	21.68	12.94	0.191	38.1	1	57	3	2	2	26.41	807	0.193	7691.29	1	21
39454	2	5.21	3.37	0.628	38.1	1	67	4	2	2	25.07	930	363	4154.72	1	48
45174	1	9.48	4.59	1.031	38.1	2	74	3	3	2	18.81	2000	0.084	4667.73	2	59
12632	1	10.85	8.91	0.549	38.2	2	75	3	5	2	22.71	1079	0.011	8115.39	2	20
13125	2	4.97	7.24	0.271	38.2	2	50	4	1	2	27.02	914		3231.12	2	28
18557	2	5.83	2.79	0.507	38.2	2	74	3	2	2	31.65	925	0.147	6216.23	1	14
26181	2	16.17	7.32	1.427	38.3	2	85	1	1	2	27.26	1363		1011.42	1	39
30771	2	21.45	23.68	0.743	38.3	2	85	3	1	2	23.47	1252	0.011	6654.53	1	33
40700	2	13.12	4.82	0.714	38.3	2	51	4	1	2	45.9	1677	0.021	7660.27	1	49
41595	2	16.22	7.58	1.441	38.3	2	76	3	2	2	18.49	1503	288	8275.46	1	60
15840	2	11.16	10.23	1.125	38.4	2	71	1	5	2	23.17	870	191	1349.35	2	27
16458	1	16.55	4.51	0.712	38.4	2	74	3	3	2	17.71	1334	0.018	5965.44	1	23
36747	2	3.96	1.11	0.264	38.4	2	64	1	1	2	33.4	505	35.9	4347.46	1	47
41570	2	4.85	3.53	0.567	38.4	1	55	3	1	2	20.62	859	297	6412.7	2	59
47015	1	4.9	4.34	0.24	38.4	2	80	4	2	1	27.23	653	0.132	3567.75	2	67
51234	2	6.2	5.64	0.733	38.4	2	65	2	1	2	22.24	961	0.011	953.464	1	73
21257	2	7.03	7.75	0.439	38.5	2	67	4	1	2	37.03	1377	0.231	5440.87	1	33
21309	1	7.56	4.08	0.474	38.5	2	64	3	2	2	26.97	1248	338	15273.6	2	34
21499	2	19.28	11.52	1.823	38.5	1	62	1	1	2	30.08	1487	0.011	1047.29	2	40
24043	2	30.07	7.64	0.829	38.5	1	79	3	2	2	28.4	1439	0.011	3012.26	2	37
24230	2	10.46	15.48	0.766	38.5	2	82	3	4	2	29.41	478	0.011	9691.83	2	39
28798	2	8.96	4.87	1.362	38.5	2	55	4	4	1	55.96	1720	0.132	11460.7	2	37
44096	2	3.96	2.47	0.378	38.5	1	64	2	1	2	24.96	678	104	1643.96	1	72
14533	2	7.39	5.29	0.513	38.6	2	67	4	3	2	30.74	1086	0.022	7524.61	2	25
16575	2	12.28	3.6	0.252	38.6	2	62	4	2	1	36.36	1006	0.864	2004.18	2	20
16899	1	6.49	4.53	0.583	38.6	2	78	4	1	1	27.18	1156	0.064	4488.33	1	27
24262	2	8.78	6.37	0.858	38.6	2	63	3	5	2	22.32	1319	0.033	12700.5	1	34
31345	1	7.1	4.43	0.982	38.6	2	67	3	2	2	26.15	1039	224	31292.9	1	46
41013	2	7.77	7.2	0.717	38.6	2	64	4	3	2	32.15	734	868	3233.63	2	50
14230	2	4.65	3.04	0.413	38.7	1	76	3	1	2	19.68	1143	237	6959.19	1	18
28011	2	8.92	4.42	0.906	38.7	2	63	4	5	2	28.03	1159	25.2	1714.73	1	42
37128	2	11.69	5.81	0.665	38.7	2	64	4	2	2	29.77	1420	0.041	2273.49	1	50
49373	2	18.86	3.55	0.674	38.7	1	58	4	2	2	22.55	1394	230	11152	2	68
51213	2	2.41	3.32	0.62	38.7	1	64	4	1	2	25.23	816	227	2849.15	1	68
22048	2	5.07	5.16	0.461	38.8	2	71	3	2	2	22.34	822	0.011	12769.8	1	37
29777	1	5.12	4.68	0.557	38.8	2	61	5	2	1	24.45	883	0.496	11966.6	1	38
44915	2	7.49	7.61	0.94	38.8	1	69	4	4	2	29.28	1125	0.038	1329	1	62
47464	2	9.93	6.6	0.822	38.8	2	80	3	4	2	23.18	1126	0.011	11373.3	2	71
50754	2	8.91	6.57	1.067	38.8	2	62	1	3	2	31.4	1657	0.018	1410.11	2	70
12485	2	17.33	8.09	1.543	38.9	1	75	4	1	1	37.13	1303	0.035	2222.34	1	27
12874	1	9.7	5.13	0.625	38.9	2	85	3	4	2	26.8	874	0.016	8361.75	2	24
23061	1	9.36	5.54	0.819	38.9	1	85	3	5	2	25.53	909	0.034	4736.54	2	36
30417	1	8.32	6.82	0.971	38.9	2	76	3	2	2	39.75	1595	0.011	7208.03	2	30
39751	2	11.51	6.72	0.763	38.9	2	75	3	3	2	30.45	1009	0.025	16946.9	1	55
44938	2	8.73	6.34	0.762	38.9	2	56	3	3	2	21.46	1701	0.027	16276.5	2	63
49711	2	4.96	3.06	0.544	38.9	1	69	4	1	2	21.9	691	1.16	1894.61	2	67
11608	2	6.76	2.89	0.39	39	2	78	4	2	2	25.14	1270	0.087	1939.81	1	14
25064	1	9.73	4.19	0.787	39	1	66	3	4	2	29.28	1371	47.4	10102.2	1	37
25068	2	4.34	2.67	0.213	39	2	69	1	1	2	24.93	657	168	633.213	1	34
15844	2	7.04	5.34	0.568	39.1	1	82	2	1	2	25.03	1146	0.032	2830.02	2	14
42172	2	7.23	4.1	0.795	39.1	2	71	4	3	1	34.31	1021	0.019	3379.25	2	67
45842	1	13.41	4.5	1.168	39.1	2	80	4	5	2	26.07	1705	422	3524.45	2	66
46477	2	9.34	6.99	0.578	39.1	1	68	3	4	1	38.18	1279	0.011	20432.3	1	61
49491	2	8.46	8.5	0.881	39.1	1	80	4	1	2	25.97	1891	0.074	2574.22	1	59
15236	2	6.58	3.9	0.672	39.2	2	72	1	1	2	22.6	1182	0.035	2550.43	1	26
24937	2	4.23	3.56	0.299	39.2	1	79	4	4	1	27.75	695	111	1867.65	2	33
38783	2	9.98	12.11	2.864	39.2	2	66	3	2	2	21.51	2321		14980	1	49
39482	1	3.38	4.15	0.323	39.2	2	75	3	3	2	20.32	1488	0.011	12707.4	2	57
13017	2	14.59	14.49	1.715	39.3	1	70	3	3	2	33.28	1205	106	6358.06	1	23
14636	2	8.13	6.37	1.127	39.3	1	67	1	1	2	24.24	1555	0.148	409.439	1	15
43916	2	11.52	6.4	0.633	39.3	2	55	3	2	2	24.31	1014	362	5262.12	2	59
10304	1	7.31	6.18	0.836	39.4	1	72	3	2	2	26.89	887	0.042	4924.81	1	23
17979	1	7.24	8.17	0.438	39.4	2	62	4	3	2	26.73	1200	0.016	4831.01	1	16
41627	2	17.87	11.58	1.129	39.4	2	80	3	3	2	24.04	1228	179	12181.6	1	68
42358	2	4.21	3.44	0.523	39.4	2	64	1	1	2	30.6	873	0.027	1385.76	2	70
20684	2	5.7	4.34	0.542	39.5	2	70	3	3	2	30.05	1024	0.011	12644.8	1	14
33806	2	4.96	3.93	0.545	39.5	2	55	3	5	2	33.08	627	0.011	13431.4	2	51
37312	2	5.86	4.66	0.925	39.5	1	76	3	4	2	31.21	841	0.011	6752.88	2	48
23978	2	6.59	3.23	0.63	39.6	2	64	1	2	2	28.14	957	0.017	2581.4	1	34
27628	2	2.58	1.63	0.208	39.6	2	56	2	1	2	22.9	668	291	8316.6	1	36
35306	2	8.49	10.73	1.005	39.6	1	78	3	2	2	24.72	1402	161	6803.06	1	45
44643	2	6.19	7.33	1.008	39.6	2	56	3	5	2	21.04	1257	0.019	13640.2	1	63
49095	2	11.38	7.55	2.167	39.6	2	66	3	4	2	36.28	1548	0.024	11490.7	2	63
11389	2	12.38	11.44	1.46	39.7	1	65	3	4	2	19.16	1690	193	10104	1	27
22095	2	6.28	7.4	0.437	39.7	1	61	1	1	2	31.95	670	74.8	2322.27	1	43
26565	2	20.01	2.88	0.361	39.7	2	50	4	3	1	39.66	762	0.188	3680.84	1	36
28610	1	13.16	12.42	0.802	39.7	2	81	3	2	2	20.81	1581	0.062	6448.55	1	42
30253	2	9.57	3.93	0.72	39.7	1	76	4	5	2	16.6	925	0.086	3923.9	1	36
33684	2	7.21	7.93	0.797	39.7	1	74	3	3	2	36.02	1217	0.053	12083.2	1	55
42927	2	14.09	10	2.366	39.7	2	61	1	4	2	24.03	2115	13.4	3445.72	1	71
46261	2	5.36	3.23	0.336	39.7	2	57	1	1	2	29.38	1612	0.06	1597.1	2	72
48828	2	4.28	3.97	0.7	39.7	2	80	4	3	1		636		5098.79	1	67
50266	1	12.95	11.12	0.715	39.7	2	76	3	2	2	29.08	1039	0.011	7433.43	2	62
14760	2	17.92	3.74	0.589	39.8	2	63	3	3	2	36.35	1270	0.04	7703.36	1	26
22024	2	6.07	3.34	0.696	39.8	2	71	3	3	2	33.04	577	0.017	14785.7	1	35
33792	2	4.81	3.7	0.406	39.8	2	73	1	1	2	24.5	862	0.025	1153.32	1	56
43474	2	6.57	2.14	0.221	39.8	2	69	3	4	2	31.14	735	0.082	9456.7	2	63
50860	1	5.75	7.75	1.107	39.8	2	62	2	1	1	31.79	728	0.011	1093.55	1	62
42941	2	10.45	4.84	0.499	39.9	2	70	3	3	2	28.34	827	0.017	7634.77	1	61
19824	2	10.29	4.52	1.038	40	1	66	3	5	2	30.23	1810	0.297	21085.6	2	24
21404	2	5.17	4.18	0.678	40	2	79	3	4	1	24.61	918	0.011	11169.1	1	31
21528	2	8.31	4.68	1.435	40	1	65	3	3	2	28.7	1780	2.37	16972	2	31
30976	2	7.38	4.37	0.892	40	1	68	4	4	2	28.45	1721	0.305	5235.23	1	30
43017	2	3.05	4.4	0.362	40	2	55	3	3	2		907	273	12616.4	2	59
48010	2	13.82	10.25	0.792	40	2	79	1	1	2	25	928	0.016	4288.2	2	70
16661	2	15.23	6.94	0.364	40.1	1	50	4	2	1	31.45	797	264	3137.41	2	20
23052	1	13.64	3.57	0.497	40.1	1	85	3	1	2	24.02	780	0.038	6364.98	2	29
30646	1	7.78	4.13	0.777	40.1	2	81	3	1	2	29.37	1021	0.011	5695.88	1	29
24455	2	8.57	3.58	0.987	40.2	1	69	1	1	2	25.41	1405	0.016	1065.34	1	34
38259	2	4.49	4.16	0.718	40.2	1	71	3	4	2	24.89	800	0.019	11699.1	2	54
41490	2	10.94	7.13	1.309	40.2	2	66	4	4	2	27.69	1411	0.045	2389.67	1	63
46756	2	3	2.79	0.41	40.2	2	77	3	3	2	28.44	627	0.028	13860.2	1	61
14910	1	7.92	3.47	0.529	40.3	2	85	3	3	2	23.56	829	0.385	3792.78	2	23
19536	2	5.88	5.7	1.124	40.3	2	59	3	5	2	36.61	1114	134	13918.4	2	23
19993	2	18.87	10.46	0.883	40.3	2	77	3	3	2	29.93	1522	0.062	11903.3	1	23
24731	2	5.78	2.72	0.501	40.3	2	56	4	4	1	27.48	788	0.011	15843.5	2	39
25723	2	3.93	4.29	0.4	40.3	2	61	3	2	2	26.88	1101	323	10430.9	2	34
29518	1	10.61	3.68	0.445	40.3	2	76	3	2	1	30.75	946	3.84	12221.6	2	33
13086	2	8.03	6.33	0.718	40.4	1	74	4	3	1	23.9	1373	0.061	967.096	1	27
14858	1	7.86	4.99	1.005	40.4	2	57	5	2	1	26.28	1207	0.011	20151.8	1	17
39970	2	7.67	7.69	0.743	40.4	2	71	4	2	2	36.26	1264	0.031	3469.99	1	51
45065	2	8.63	5.76	1.123	40.4	1	75	2	2	2	31.21	1610		1757.29	2	61
45658	1	5.71	3.86	0.502	40.4	1	57	2	1	2	29.52	1039	0.397	8153.72	2	61
21050	2	9.29	8.91	0.765	40.5	1	69	3	3	2	29.54	1317	0.155	33802.7	2	32
37722	1	9.85	3.77	0.518	40.5	2	84	3	4	2	28.08	789	0.011	7389.11	2	55
43976	2	10.4	6.71	0.796	40.5	2	60	1	2	2	33.61	1838	0.204	1905.45	2	65
45445	2	4.19	3.84	0.539	40.5	1	78	3	1	2	32.5	732	1.21	3990.84	2	59
45982	1	12.69	7.66	2.068	40.5	1	80	4	4	1	33.6	1899	0.022	2219.42	2	70
20709	2	5.4	3.52	0.441	40.6	2	73	3	4	2	35.44	841	0.011	7564.06	2	24
35549	2	6.25	4.57	0.413	40.6	2	70	1	3	2	24.38	972	0.011	2630	2	54
41796	1	16.12	4.6	0.58	40.6	2	60	4	3	1		806	0.124	3503.95	2	60
15077	2	5.09	4.83	0.709	40.7	2	64	4	5	1	34.49	1438	30.9	4831.01	1	16
35092	2	7.38	9.62	0.953	40.7	2	72	3	5	2	32.04	1343	0.011	11233.6	1	54
38337	2	7.95	7.42	1.036	40.7	1	64	1	2	2	41.87	1517	0.036	1084.28	2	58
42180	2	7.61	4.21	1.007	40.7	1	74	3	3	1	37.21	1899	0.089	8101.52	2	61
10539	2	8.4	4.74	0.581	40.8	2	73	5	1	1	24.8	937	0.035	15427.3	1	15
41879	1	6.99	9.13	1.205	40.8	2	80	3	4	1	31.63	2029	0.035	6354.8	1	60
50880	2	8.87	12.15	1.752	40.8	2	57	4	5	2	25.22	1383	0.011	4885.36	1	68
15228	2	4.81	4	0.765	40.9	2	73	3	4	1	33.98	1549	0.021	11805.1	1	22
22328	2	13.35	10.56	1.458	40.9	2	61	1	2	1	37.05	1267	1.06	823.632	2	33
41751	2	15.67	6.83	1.288	40.9	2	73	3	3	1	40.45	760	0.06	5039.42	2	59
11051	2	7.46	6	0.571	41	1	67	1	2	2	24.15	1264		2859.74	2	17
20018	2	6.3	4.84	0.87	41	2	76	3	3	2	30.94	1276	0.011	4617.68	2	23
23904	2	5.75	4.56	0.555	41	2	51	4	4	2	23.76	1292	532	17497	2	37
31278	2	9.95	7.17	1.089	41	1	65	1	1	2	26.01	1182	376	2236.49	2	54
17978	2	9.86	8.32	1.168	41.1	1	73	3	3	2	26.06	1863	0.129	3496.39	1	20
19410	2	7.87	6.86	0.777	41.1	2	70	3	4	2	22.12	1217	2.37	11033.4	2	26
25922	2	4.6	4.86	0.454	41.1	2	63	3	3	2	26.52	1372	0.011	7986.17	2	39
34461	2	3.58	1.97	0.35	41.1	2	65	2	1	2	29.83	422	0.033	8448.99	1	58
50766	2	7.55	5.44	0.998	41.1	2	56	4	4	2	19.73	1576	27.8	11485.6	1	64
12767	2	4.26	2	0.405	41.2	2	62	3	3	2	27.28	556	0.011	11319.8	2	14
17425	2	8.32	6.29	0.861	41.2	1	77	3	5	2	31.26	1333	0.024	10263.9	2	14
36795	2	12.15	4.77	0.435	41.2	2	69	4	3	2	46.82	1517	0.442	6962.91	1	47
37127	2	10.29	2.91	0.632	41.2	2	71	4	5	2	22.61	983	0.025	8291.58	2	58
39165	2	2.17	2.87	0.457	41.2	2	51	4	5	2	27.49	594	0.027	8399.81	2	45
40717	2	5.68	4.72	0.576	41.2	2	74	1	1	2	26.43	849	0.022	4064.8	2	54
43031	1	7.34	3.86	0.781	41.2	2	80	1	1	2	19.5	843	0.011	4406.28	2	70
25250	2	5.25	6.03	0.502	41.3	1	67	1	1	2	26.43	1081	0.028	492.327	1	34
40887	2	15.73	7.33	1.038	41.3	2	56	1	1	2	25.32	1936	0.015	2572.51	1	56
45746	2	5.77	5.04	0.436	41.3	2	61	4	2	2	16.64	1183	266	2427.49	2	68
23174	2	6.11	4.65	0.366	41.4	1	72	1	1	2	25.4	984	215	2806.38	1	34
27645	1	9.41	8.11	0.65	41.4	2	83	3	1	1	27.83	1269	0.031	11795.3	2	34
47572	2	11.72	9.46	1.664	41.4	2	68	3	2	2	26.06	1346	0.131	7677.47	1	71
18300	2	5.3	4.42	0.475	41.5	1	59	3	2	2	25.47	1128	0.47	9969.99	1	14
24528	1	10.2	2.45	0.272	41.5	2	84	3	3	2	22.17	715	0.086	4439.11	1	38
28283	2	5.24	3.43	0.448	41.5	1	83	3	4	2	28.71	848	0.019	2622.56	1	31
30101	1	7.53	4.44	1.03	41.5	2	80	3	4	2	25.62	1408		4590.87	2	29
31175	2	5.17	4.65	0.557	41.5	1	75	4	1	2	31.21	691	0.59	1085.4	2	45
41252	2	12.13	6.08	1.747	41.5	2	73	3	4	2	24.39	1630	0.017	7830.18	2	53
26672	2	15.32	8.41	1.112	41.6	2	74	4	3	1	33.3	1484	0.268	2517.78	2	42
36414	2	3.59	3.3	0.638	41.6	1	80	3	1	2	35.44	690	0.125	4801.16	2	46
44719	2	5.97	4.88	8.186	41.6	2	76	2	2	2	26.55	682	0.024	3439.21	1	60
49986	2	6.99	5.09	0.702	41.6	2	63	2	5	2	33	917	0.011	1773.15	1	66
11972	2	12.45	3.59	1.043	41.7	2	85	3	3	2	28.83	1593	0.436	7380.43	1	23
23500	2	5.96	6.42	0.624	41.7	2	66	1	1	2	30.85	1062	0.011	1804.96	2	40
29490	2	12.37	4.22	0.643	41.7	1	72	2	1	2	24.43	1487	0.094	6145.27	2	36
32082	2	5.23	4.34	0.498	41.7	1	60	4	3	2	22.27	854	24.5	2166.19	2	49
33093	2	14.06	13.42	1.015	41.7	1	74	3	3	1	45.74	1373	0.011	12676.2	2	46
33263	2	7.66	6.54	1.223	41.7	1	61	1	1	2	19.47	1604	429	5255.97	1	57
38651	2	5.57	5.96	0.628	41.7	1	75	1	1	2	21.42	1122	1.35	2141.94	2	58
44498	2	15.34	3.77	0.51	41.7	2	69	4	3	2	34.31	920	0.122	2882.28	2	67
18592	2	15.33	4.12	0.567	41.8	2	64	3	3	2	19.67	1177	0.021	7364.68	1	23
24723	1	4.43	6.18	0.442	41.8	1	78	1	1	2	25.2	615	0.04	1303.02	2	40
31263	1	14.03	6.42	0.586	41.8	2	78	4	1	1	31.64	778	0.019	3785.97	2	49
39797	2	7.2	7.05	1.632	41.8	2	84	3	3	2	23.56	1159	0.011	5798.02	2	46
40815	1	5.71	1.94	0.345	41.8	2	70	3	3	2	41.12	588	0.022	14083.6	2	48
44850	2	10.55	5.12	0.912	41.8	1	72	3	2	2	27.24	872	0.025	2745.39	1	65
22127	2	12.53	5.4	0.913	41.9	2	51	4	3	1	28.9	1153		5464.97	1	35
36077	2	6.79	4.18	1.162	41.9	2	72	3	3	2	27.83	541	0.025	12123.5	2	46
37749	1	13.51	9.64	0.753	41.9	2	84	3	1	1	35.89	966	0.062	15970.7	2	47
49242	2	5.11	3.14	0.407	41.9	1	62	3	3	2	26.42	1018	558	4903.28	2	72
14587	2	7.1	9.47	0.432	42	2	85	1	1	1		1141	0.03	793.771	2	17
29564	2	15.73	6.53	0.658	42	2	60	3	2	2	22.82	952	0.016	20922.1	2	33
31721	2	6.87	3.15	0.595	42	1	62	4	4	2	32.49	1870	0.024	4614.07	2	49
42206	2	5.85	9.98	0.869	42	2	56	1	4	1	31.78	870	130	2176.24	1	66
43852	2	4.9	3.7	0.625	42	2	52	4	2	1	50.47	944	920	7525.64	1	59
10243	1	15.81	4.68	0.91	42.1	2	82	3	5	2	22.72	1687	0.011	4949.04	2	17
22868	2	6.78	4.15	0.28	42.1	2	61	1	1	2	34.73	704	0.035	563.424	1	39
33566	1	17	10.09	0.721	42.1	1	82	3	2	2	31.58	1289	0.423	4970.29	2	56
35121	2	18.05	10.25	1.065	42.1	1	73	3	4	2	27.25	1374	0.011	7468.82	2	47
39405	2	6.38	5.26	0.718	42.1	2	69	3	4	2	27.74	998	0.029	52088.3	1	57
44053	1	5.49	3.59	0.694	42.1	2	80	3	3	2	25.05	1054	0.033	7135.24	1	63
51522	2	6.31	4.6	0.634	42.1	2	62	3	4	2	26.51	902	0.019	4631.18	1	60
24428	2	8.1	5.94	0.677	42.2	2	76	3	2	2	25.79	1276	1.48	8903.28	2	34
29008	2	6.31	4.39	0.748	42.2	1	79	1	1	2	24.65	1315	127	839.119	1	34
30419	2	10.58	3.79	0.842	42.2	2	75	4	4	1	28.51	1534	0.024	2212.18	1	41
33291	2	20.72	7.48	1.058	42.2	1	79	3	5	2	23.16	1863	0.011	4707.51	2	50
35756	2	16.34	7.08	0.539	42.2	2	80	3	3	2	25.7	782	0.092	4624.06	2	44
38491	1	6.77	5.52	0.642	42.2	2	85	3	3	2	22.36	1061	0.011	7207.1	1	55
45833	1	13.01	8.31	0.814	42.2	2	80	3	2	2	21.64	1479	0.202	8868.83	2	61
29893	2	5.31	3.46	0.477	42.3	1	59	1	1	2	25.95	948	0.065	2558.6	1	38
30033	2	7.99	3.41	0.913	42.3	1	73	1	4	1	26.59	908	0.011	619.128	1	34
36356	2	17.02	12.9	0.847	42.3	2	64	3	5	2	25.62	1072	0.023	25845	1	55
38602	2	6.95	6.1	0.573	42.3	2	69	4	5	2	26.16	1587	0.046	4270.42	1	51
46651	2	4.54	4.44	0.211	42.3	2	59	2	4	2		1035	0.07	2175.18	1	71
23828	2	9.2	3.87	0.905	42.4	2	70	3	4	2	26.49	1133	0.022	11047.9	2	32
30189	1	20.26	3.86	0.682	42.4	2	81	3	4	1	28.44	1091	0.274	8770.58	2	33
34674	1	5.54	3.57	0.538	42.4	2	80	3	2	2	33.91	867	0.011	4663.61	2	50
38240	2	4.5	3.66	0.39	42.4	1	75	3	3	1	26.93	698	1.01	6075.95	1	44
42295	2	12.7	8.91	1.513	42.4	2	75	4	3	2	27.52	1994		2638.28	1	64
10101	2	11.33	5.56	1.685	42.5	1	68	4	5	1	26.44	3056	268	1913.41	1	20
11130	1	10.28	9.01	0.726	42.5	1	82	3	4	2	26.71	1112	0.021	4325.55	1	19
24027	2	2.93	3.44	0.412	42.5	2	68	4	1	2	32.45	517	0.011	2202.72	2	36
41820	2	12.57	7.5	0.655	42.5	2	79	1	1	1	29.97	876	0.011	1384.55	1	70
18269	2	4.5	3.97	0.3	42.6	2	85	4	1	2	24.25	1064	0.95	1762.52	2	26
24745	2	5.43	2.9	0.533	42.6	2	55	4	5	2	18.76	867	0.011	7277.22	2	37
43995	1	9.62	5.83	0.692	42.6	2	80	3	2	1	30.54	1346	0.011	7860.7	1	69
48858	1	15.67	9.96	1.536	42.6	2	80	5	4	1	24.49	1206	0.045	7947.66	2	69
10879	1	7.41	4.52	1.031	42.7	1	81	3	4	2		1307	0.034	1989.36	1	22
35578	2	8.59	5	0.894	42.7	1	68	3	5	2	32.32	1206	434	29927.1	1	46
35609	2	7.21	3.57	0.797	42.7	2	64	3	4	2	32.07	904	444	39652.5	2	49
37031	2	2.17	3.35	0.412	42.7	2	53	4	4	2	40.55	747	219	6473.76	2	54
38978	1	5.73	3.98	0.539	42.7	2	76	1	1	2	28.08	689	0.015	1296.52	1	55
40223	2	6.7	2.87	0.497	42.7	2	57	1	1	2	59.12	1261	0.16	1901.04	2	46
48887	2	7.19	5.12	0.847	42.7	1	72	4	2	1	25.81	1087	0.023	1867.58	1	63
16424	2	8.25	6.08	1.2	42.8	2	59	3	4	2	20.6	1376		24585.4	1	17
37650	1	14	9.77	2.138	42.8	2	60	3	2	2	27.79	2215	0.042	26424	2	49
17343	2	7.28	6.15	0.917	42.9	2	72	3	3	2	24.52	1087	0.046	5536.24	1	14
21999	1	11.74	6.34	0.846	42.9	2	85	3	4	2	23.49	1095	0.105	9403.27	2	30
35315	2	7.06	5.53	1.132	42.9	2	60	3	5	2	24.67	1161	0.011	18557.5	1	54
39860	2	6.38	5.22	0.588	42.9	2	58	4	5	1	35.1	898	0.13	5279.81	1	44
47524	2	4.44	6.27	0.462	42.9	1	76	3	1	2	20.23	729	209	9998.17	2	63
49961	2	9.19	4.11	0.634	42.9	2	50	4	3	1	24.74	1431	261	4889.5	2	64
51392	2	5.86	4.92	0.721	42.9	1	64	2	3	1	36.96	1307	0.016	1773.59	1	72
15874	2	18.27	7.68	0.79	43	2	68	3	4	2	21.85	1372	0.011	18887.3	1	17
35826	2	7.66	8.17	0.694	43	1	72	1	2	2	29.46	993	0.015	4651.07	1	55
42557	1	12.07	10.69	0.772	43	2	68	3	3	1	46.97	1040	0.029	22903.8	1	61
11502	2	6.37	5.51	0.904	43.1	2	77	3	5	2	25.01	1544	0.017	12241.3	2	14
25838	2	16.58	9.04	1.006	43.1	1	78	1	5	1	22.99	1411	0.011	1795.1	2	43
26235	2	10.12	7.89	0.557	43.1	2	65	1	4	2	25.54	997	0.011	3048.64	2	38
32644	2	16.04	6.03	1.013	43.1	1	84	3	1	2	31.72	1295	0.819	2454.01	1	44
32808	2	2.73	2.57	0.513	43.1	2	76	5	4	2		513	0.049	6174.23	1	58
41642	2	10.79	8.84	2.255	43.1	2	73	3	3	2	27.16	1960	0.035	8169.64	1	63
46991	2	18.07	12.23	2.023	43.1	2	80	2	5	2	22.88	1664	0.023	5171.91	1	72
49004	2	6.38	5.78	0.905	43.1	2	72	5	5	2	21.97	871	0.011	8606.03	2	71
29521	1	13.86	3.9	0.49	43.2	1	85	4	1	2	24.05	1644	0.126	11352.9	1	42
46627	2	7.39	4.22	0.977	43.2	2	73	1	1	2	27.43	1106	0.033	2480.17	2	71
14840	2	19.18	9.96	1.453	43.3	2	73	3	3	2	29.69	1676		5845.14	2	28
23331	2	10.25	7.33	1.412	43.3	2	56	4	5	2	40.62	1608	0.011	5971.31	1	42
27349	1	12.69	3.91	0.605	43.3	2	85	4	1	1	25.8	1056	0.029	7473.84	1	42
28250	2	7.81	4.03	0.547	43.3	2	52	4	1	1	42.1	1886	150	6824.29	2	39
28435	1	6.19	5.85	0.584	43.3	1	80	1	1	2	26.07	2304	0.029	609.255	1	39
41362	2	9.06	4.3	0.73	43.3	2	84	3	3	2	30.54	1162	0.293	10958.3	1	47
33346	2	7.7	7.71	0.872	43.4	2	72	1	3	1	32.73	1278	0.023	4879.25	2	54
35798	2	7.55	5.41	0.765	43.4	1	65	3	3	2	26.08	1342	1.07	13811.8	2	46
39098	1	3.59	2.72	0.436	43.4	1	72	3	1	1	22.59	775	533	2771.84	2	49
40599	2	11.01	4.47	0.751	43.4	2	71	3	3	2	28.04	1593	0.189	28616.4	2	47
43592	2	6.14	5.17	0.618	43.4	2	69	3	3	2	27.09	933	26	15997.6	2	60
45057	2	8.18	6.07	1.208	43.4	1	79	1	5	1	28.17	1240	0.05	1216.09	2	73
23524	2	15.52	7.2	0.739	43.5	2	76	3	3	1	26.08	1311	0.011	9057.03	2	39
28772	2	7.47	5.18	0.881	43.5	2	83	3	3	2	21.18	1025	0.011	4329.35	2	30
29104	1	7.77	9.75	0.646	43.5	1	69	3	3	2	22.16	762	0.011	8828.67	1	31
40196	2	10.13	13.25	1.232	43.5	1	59	5	5	2	30.49	1761	0.011	13708	1	54
43570	2	15.65	8.54	0.816	43.5	2	70	3	3	2	29.01	1714	0.015	10668.6	2	61
13984	2	11.59	6.07	0.61	43.6	2	73	3	3	2	29.12	1118	0.22	13073.4	2	27
21910	2	19.52	10.7	0.419	43.6	1	57	3	2	2	30.94	1068	0.128	59250.5	1	31
42125	1	12.6	4.15	0.415	43.6	1	80	4	1	2	31.14	1420	0.022	2787.97	2	67
48588	2	7.35	5.79	0.367	43.6	2	66	1	1	2	23.46	1084	0.191	1025.53	1	71
48813	2	13	13.53	0.95	43.6	1	80	3	3	2	31.47	1494	0.813	2789.83	2	63
15640	2	7.54	4.08	0.661	43.7	2	70	2	1	2	28.47	963	49.1	9639.31	2	27
29800	1	9.7	5.65	1.291	43.7	1	73	3	3	1	34.05	2256	0.099	3482.71	2	34
46126	2	15.63	12.6	0.492	43.7	2	65	3	2	2	26.8	1141	193	4470.86	1	67
25768	1	10.81	4.17	1.154	43.8	2	84	3	2	2	29.69	1159	0.511	7832.55	1	42
32377	1	3.49	2.74	0.286	43.8	2	72	3	3	2	21.13	680	0.096	14633.2	2	44
34012	1	4.39	3.92	0.475	43.8	2	82	3	1	2	33.32	1057	1.39	12176.1	2	53
34849	2	9.9	6.78	0.961	43.8	2	71	4	2	2	30.27	1708	413	8341.7	2	49
39919	2	12.41	11	1.036	43.8	1	74	4	3	1	25.97	888	0.098	2073.04	2	53
40351	2	19.98	9.4	1.571	43.8	2	56	2	4	2	28.05	1595	137	14201.8	1	58
43023	2	4.68	4.45	0.601	43.8	2	61	1	3	2	31.71	1297	0.011	2164.35	1	60
45834	1	6.27	5.83	0.863	43.8	2	72	3	5	2	23.91	1277	174	12268.1	1	71
50133	2	4.03	6.67	0.559	43.8	2	76	3	2	2	27.26	1212	0.095	4286.54	1	59
20976	2	5.24	5.56	0.515	43.9	1	78	4	4	2		678		3649.55	2	18
22831	2	13.12	2.93	0.327	43.9	2	60	3	4	2	24.3	1133	0.011	17985.7	2	32
34462	1	7.11	5.31	0.974	43.9	2	85	3	5	1	23.09	1406	0.011	8444.47	2	52
35904	2	8.31	4.44	0.715	43.9	2	64	4	2	1	32.59	527		1910.68	2	52
42416	2	6.38	6.79	0.666	43.9	1	62	4	4	2	35.07	1417	0.015	2368.67	2	65
46674	2	7.08	3.86	0.749	43.9	2	69	2	1	2	31.08	755	0.011	1287.22	2	65
46950	2	5.44	3.66	0.57	43.9	2	74	2	1	1	31.25	837	0.011	1585.72	2	73
18769	2	4.2	2.07	0.371	44	2	85	4	1	2	23.86	528	284	1837.53	1	24
41908	2	7.16	6.65	1.221	44	2	55	1	1	1	33.64	1293	0.011	4608.06	1	66
48704	2	9.2	6.19	1.195	44	2	71	1	4	2	27.67	1473	0.011	1554.37	2	66
48797	1	10.02	5.15	0.985	44	1	80	2	4	1	24.97	1608	0.022	1496.95	2	69
49003	2	5.7	4.84	0.73	44	1	71	3	5	1	32.74	1086	0.042	11065	2	65
22834	2	6.74	4.43	0.565	44.1	2	63	1	4	2	24.18	808	0.011	3241.87	1	39
24420	1	7.56	5.75	0.751	44.1	1	72	3	3	2	25.77	1419	0.011	6064.28	1	31
29632	2	6.31	4.37	0.475	44.1	1	61	1	2	1	29.36	1099	0.071	531.559	2	40
32601	2	7.89	4.34	0.541	44.1	2	58	3	2	1	35.34	1125	211	8822.91	2	44
42296	1	7.41	4.65	0.627	44.1	2	80	3	3	2	21.55	1256	0.011	7842.79	2	67
20443	2	3.6	2.89	0.674	44.2	2	56	3	4	2	35.86	751	0.011	31430.9	2	19
21682	2	5.8	3.47	0.466	44.2	1	70	1	1	1	26.18	681	11.9	1620.88	1	34
25485	2	3.61	7.2	0.737	44.2	2	59	3	2	2	37.51	1059	4.38	17305.2	1	31
26729	2	5.62	3.17	0.733	44.2	2	73	3	3	2	31.4	1621	0.029	13035.8	1	37
44392	2	8.2	11.18	1.785	44.2	2	55	4	4	2	22.13	2499	1.43	4350.32	1	63
45601	1	11.54	7.71	1.536	44.2	1	80	3	4	2	28.67	2298		8403.36	1	65
13835	2	5.62	3.32	0.535	44.3	2	72	3	5	2	27.45	745	0.011	9069.01	2	22
15892	2	8.41	3.95	0.823	44.3	2	77	3	5	2	22.18	1808	151	13208.4	1	14
17733	2	7.4	3.24	0.675	44.3	1	63	1	1	2	31.19	1378	122	266.33	2	17
27359	2	19.2	17	0.807	44.3	1	58	3	2	1	19.19	1587	230	44539.2	2	34
29627	2	8.91	6.62	0.836	44.3	1	77	3	2	1	32.77	663	21.3	3103.47	1	32
30060	1	9.58	6.15	1.231	44.3	2	84	3	4	2	20.03	1415	0.011	4864.34	2	39
38598	2	5.02	4.95	0.495	44.3	2	63	1	1	1	33.35	709	0.011	3078.02	2	56
38660	2	6.17	4.55	0.77	44.3	2	84	3	2	2	24.96	858	0.025	6661.44	1	55
48005	2	26.63	5.4	0.39	44.3	2	73	3	3	1	31.14	984	0.058	12059	2	61
24140	2	14.27	9.28	1.483	44.4	2	61	4	4	1	29.27	943		2113.98	1	36
44758	2	11.65	5	0.609	44.4	2	59	2	2	1	29.5	816	0.011	4941.52	1	62
49557	2	9.22	6.86	0.769	44.4	2	72	3	3	2	28.99	974	0.121	11074.2	1	67
13069	1	12.35	4.69	0.773	44.5	1	85	3	5	1	24.99	1522	0.011	5280.8	2	25
17446	2	5.7	5.98	1.096	44.5	1	59	4	2	2	22.61	1414	0.08	7986.35	2	20
21836	2	10.09	3.86	0.689	44.5	2	80	3	2	2	19.29	1643	0.011	3488.59	2	29
32684	2	10.31	6.61	1.14	44.5	2	67	4	3	2	33.24	1752	112	1355.81	2	45
34873	2	15.88	8.73	1.71	44.5	1	73	4	1	1	22.83	1779	0.016	1511.74	2	51
39976	2	14.16	8.97	1.13	44.5	1	70	1	1	2	31.27	1493	0.069	2392.03	1	58
41375	2	4.68	5.43	0.743	44.5	2	66	4	2	1	46.83	581	185	3275.88	2	49
47754	1	20.62	8.27	1.063	44.5	2	70	4	5	2	35.19	969	0.033	2420.63	1	62
49196	2	4.42	3.53	0.361	44.5	2	71	2	1	1	34.94	829	0.02	2746.44	2	73
22837	2	10.12	5.41	0.426	44.6	2	85	3	3	2	24.52	1425	0.067	5534.74	1	38
39324	1	4.22	1.79	0.277	44.6	2	85	3	3	2	33.11	865	0.026	5354.83	1	44
40161	2	4.68	4.02	0.505	44.6	2	83	3	2	2	20.87	1016	0.057	13792.3	2	48
43261	2	5.29	4.76	0.944	44.6	1	62	4	4	1	30.14	1188	0.111	1839.24	2	63
47243	2	10.7	4.89	0.859	44.6	1	77	3	4	2	24.23	1351	0.015	12231.2	2	70
19489	1	14.8	15.6	0.321	44.7	1	85	3	3	2	22.02	640	0.011	1270.8	2	21
23235	1	5.61	3.96	0.736	44.7	2	75	1	1	2	30.59	862	0.011	1117.5	1	34
28171	2	11.22	10.4	0.497	44.7	1	82	3	3	2	22.64	997	248	2225.92	1	32
35341	1	12.85	6.15	0.688	44.7	2	81	3	5	1	20.19	1064	0.015	5669.53	1	46
36646	2	4.59	3.23	0.519	44.7	2	66	3	2	2	37.9	998	0.052	6778.56	2	49
38721	2	11.71	7.8	0.646	44.7	2	85	3	2	1	24.66	701	0.04	7435.17	1	44
38996	2	8.68	7.72	0.775	44.7	2	55	4	4	1	23.73	998	0.015	6161.15	1	52
42946	2	8.85	4.53	1.007	44.7	1	67	4	3	2	21.84	1476	0.583	3475.17	2	59
14171	2	10.43	7.65	0.68	44.8	2	58	3	3	2	24.4	1209		14771.9	1	19
21772	2	9.12	5.61	0.749	44.8	1	66	1	5	1	33.42	1311	74.9	1294.8	1	40
31151	2	9.79	6.06	1.041	44.8	2	59	4	3	1	29.51	1722	0.011	4070.38	2	53
43520	2	4.54	4.43	0.576	44.8	2	56	4	3	1	34.07	714	233	7698.74	1	64
47574	2	5.08	5.29	0.462	44.8	2	51	4	1	2	21.39	647		11802.3	1	59
20437	2	10.93	7.25	0.928	44.9	2	76	4	2	2	26.47	1535	0.035	2182.81	1	20
37134	1	13.58	5.26	0.882	44.9	2	75	3	4	2	43.17	1614	0.021	13371.4	2	47
43358	2	9.17	6.47	1.084	44.9	1	71	4	2	2	29.37	1836	0.162	2320.6	1	61
12129	2	9.38	6.11	1.371	45	1	68	1	4	1	24.97	1668	0.035	282.159	1	25
15493	2	5.19	1.54	0.335	45	1	66	3	3	2	23.04	520	0.02	6664.74	1	21
18988	1	6.31	4.2	0.618	45	2	80	3	4	1	29.25	1526	43.9	6704.45	1	24
27005	1	17.01	9.3	1.146	45	1	84	3	2	2	24.07	1323	0.011	7353.98	2	31
31149	2	14.92	7.98	0.67	45	2	85	3	2	2	21.63	1164	0.011	7423.27	2	52
46158	2	7.8	7.25	0.859	45	1	70	3	3	2	26.23	1267	0.423	7861.11	2	60
50755	2	6.56	4.68	0.769	45	2	75	3	3	2	29.04	870	0.011	6807.75	1	60
11189	1	8.75	9.06	0.782	45.1	2	75	3	2	1	27.48	1332	0.043	6015.97	2	22
15503	2	4.14	2.54	0.934	45.1	2	70	3	1	2		1141	682	6251.93	1	21
17768	1	25.07	9.22	0.793	45.1	2	68	3	4	2	36.7	1446	0.011	11451.1	2	19
27688	2	8.17	5.92	0.65	45.1	2	64	1	3	1	31.73	763	0.028	2852.08	2	42
28430	1	5.21	3.18	0.317	45.1	2	82	3	1	2	38.27	867	0.022	4794.22	2	43
31946	1	4.37	3.99	0.52	45.1	2	65	3	3	1	24.71	694	0.011	12563.6	1	49
37049	2	10.06	7.23	0.502	45.1	2	70	1	1	2	22.75	1043	0.037	8729.02	2	47
42015	1	8.96	6.55	1.107	45.1	2	79	3	4	2	20.31	1550	0.011	6072.82	2	60
48691	2	12.37	7.42	0.717	45.1	1	56	4	5	2	22.96	1448	1.1	4494.78	1	59
17242	1	6.61	6.18	0.574	45.2	1	83	3	4	2	22.96	2060	251	3339.57	2	22
17795	2	4.98	2.71	0.635	45.2	2	82	3	1	2		677	0.54	5968.94	1	21
30118	2	8.45	4.18	0.66	45.2	1	82	3	1	2	21.19	1509	0.024	2341.21	2	34
30807	2	4.94	2.76	0.548	45.2	2	65	1	1	2	34.5	816	0.011	589.798	2	38
35424	2	4.34	3.17	0.468	45.2	2	50	4	4	2	19.68	1723	405	10373.7	2	52
13731	1	7.8	5	0.499	45.3	2	65	3	4	2	20.66	1217	0.011	16636.4	1	19
15579	2	13.79	4.84	0.444	45.3	2	68	4	4	2	42.06	848	0.273	9014.11	2	28
20198	1	4.93	2.95	0.603	45.3	2	65	2	1	1	24.27	700		5064.72	1	17
34774	2	8.35	6.17	1.103	45.3	2	62	1	2	2	22.88	1317	15	4075.67	1	55
41675	2	6.32	7.68	0.442	45.3	2	71	3	3	1	24.53	1130	505	5226.62	2	59
20219	1	6.53	5.36	0.659	45.4	2	74	3	3	2	32.5	1672	0.082	14447.1	2	18
35891	2	16.79	5.36	0.625	45.4	1	63	4	4	1	29.82	930	248	2717.92	1	50
40335	2	5.19	4.76	0.647	45.4	2	61	5	3	1	31.76	831	0.052	2216.94	2	51
18294	2	15.22	3.52	0.639	45.5	2	70	3	3	2	20.94	919	0.035	6108.52	1	27
24703	2	16.98	7.73	0.636	45.5	1	60	4	4	2	36.47	1320	20.6	4863.36	1	38
26510	2	8.88	6.75	0.83	45.5	1	53	4	2	1	46.71	1540	0.17	9059.82	2	42
30584	2	8.02	6.18	0.741	45.5	2	59	3	5	2	32.26	1368	0.053	14836.4	2	32
32459	2	10.33	13.03	1.031	45.5	2	62	3	4	2	19.56	1317	297	8242.14	2	47
43862	2	9.71	7.16	0.651	45.5	1	53	4	3	2	30.45	1486	0.193	2543.32	1	68
44252	2	10.19	7.14	1.414	45.5	2	58	2	1	2	27.78	1773	0.011	1443.71	1	62
11507	2	4.37	9.97	0.203	45.6	1	85	1	1	1	22.78	764	48.9	881.151	2	17
13929	1	17.27	8.7	1.275	45.6	2	78	1	2	2	31.82	1195	0.112	639.023	1	28
25222	2	7.9	3.79	0.753	45.6	2	69	3	3	2	26.08	1765	0.1	4823.39	2	31
29214	2	6.52	5.62	0.808	45.6	1	85	4	2	1	17.44	936	0.02	1587.19	1	30
43180	1	7.29	7.23	0.757	45.6	2	64	4	4	2	35.64	1208	0.016	2575.23	1	68
44210	2	24.77	8.74	0.845	45.6	1	71	3	5	2	28.9	1128	0.011	1774.59	1	60
44299	2	15.28	5.38	0.96	45.6	1	67	1	3	2	25.01	1719	0.025	1438.9	2	71
47937	2	6.91	5.65	0.607	45.6	2	60	3	4	2	28.81	989	0.29	21477.4	2	60
51617	2	5.83	5.77	0.611	45.6	2	71	2	1	2	30.97	1031	0.016	2417.57	2	69
10282	2	6.1	8.04	0.58	45.7	1	58	4	3	2	38.89	1623		5134	1	25
21864	1	5.59	2.51	0.385	45.7	2	78	1	1	2	24.74	887	0.011	1098.15	2	40
22597	1	4.84	2.9	0.476	45.7	2	72	4	3	2	30.59	633	0.034	6569.54	2	33
33385	2	15.75	8.84	1.531	45.7	2	64	3	5	2	28.74	1326	0.056	35673.7	1	57
39363	2	9.91	6.1	0.744	45.7	2	50	4	3	1	47.07	1507	258	5628.17	2	49
24795	2	8.78	4.46	0.561	45.8	2	80	3	3	2	22.57	965	0.011	9266.57	1	35
30893	2	10.88	4.86	0.478	45.8	2	70	4	3	1	26.19	792	26.3	2758.28	1	35
42104	2	5.76	6.07	0.56	45.8	2	71	3	4	2	29.04	764	0.029	9403.61	2	69
49555	2	4.02	6.71	0.471	45.8	2	69	1	1	2	31.74	1022	0.171	1926.96	1	66
18068	2	5.62	3.54	0.537	45.9	2	72	3	2	2		1292	0.067	8007.81	2	16
22945	2	12.43	6.62	1.311	45.9	1	71	5	5	2	29.1	1455	0.058	2266.3	1	43
23675	2	11.15	9.05	0.28	46	2	63	4	3	2	36.37	533	0.02	7555.79	1	41
41452	2	5.45	5.61	0.753	46	2	60	1	1	2	31.77	1737	0.027	578.488	2	57
43632	2	6.62	5.17	0.684	46	2	65	2	3	2	35.33	865	0.074	1023.42	1	62
46572	2	9.36	7.09	1.844	46	2	61	4	5	2	25.48	1494	588	4973.21	2	67
31038	2	11.35	7.38	1.052	46.1	2	61	4	5	2	30.81	1567	0.011	5244.05	1	41
31400	1	9.49	6.42	0.626	46.1	2	78	3	4	2	24.52	1385	248	20546.3	1	56
34607	2	7.26	4.91	0.944	46.1	2	63	1	3	1	25.49	1004	0.022	578.488	2	57
42746	2	15.5	13.61	0.69	46.1	2	69	3	5	2	21.22	1243	0.017	23550.6	1	60
43991	2	7.18	3.88	0.987	46.1	2	61	2	1	2	41.43	1238	0.043	3559.79	2	65
44352	1	8.16	5.6	0.593	46.1	2	80	3	3	1	27.81	1374	0.035	15347.4	1	64
45393	2	6.64	3.85	0.653	46.1	2	59	3	3	2	16.86	1019	520	11230.6	1	67
49853	2	10.11	14.12	1.284	46.1	1	67	4	3	1	29.81	1641	0.106	1546.38	1	63
29020	1	11.56	5.15	0.746	46.2	1	76	3	3	2	26.98	1070	1.13	7397.18	1	29
36765	2	5.42	6.04	1.275	46.2	2	72	3	1	2	29.16	1275	0.011	8129.55	2	49
50279	2	14.5	9.51	0.802	46.2	2	57	4	3	2	41.14	1186	0.049	9998.37	1	59
11876	1	48.03	38.68	1.708	46.3	2	82	3	2	1	23.38	2382	0.707	3959.77	1	18
14445	2	21.45	8.88	1.371	46.3	2	73	4	4	2	23.99	1412	0.035	1394.87	1	20
15012	2	10.38	3.87	1.413	46.3	2	61	3	2	2		1027	295	16090	2	26
18674	2	6.46	4.48	0.563	46.3	2	71	5	5	2	26.52	898	0.038	13364.7	1	20
29475	2	6.27	4.72	0.591	46.3	1	66	1	3	2	36.12	1040	0.17	1010.82	1	34
33938	2	13.28	7.1	1.305	46.3	2	67	4	5	2	28.54	1544	0.017	6266.83	1	49
38388	2	10.66	5.37	0.665	46.3	2	64	3	4	2	27.39	1335	416	6986.36	2	44
44749	2	4.11	2.96	0.447	46.3	2	59	4	3	2	15.44	843	286	10942.7	2	68
49737	2	13.28	10.15	1.17	46.3	2	62	1	2	2	41.82	1003	0.011	1053.6	2	71
41960	2	8.88	5.96	0.58	46.4	2	80	3	3	2	25.8	1132	0.011	11157.2	2	62
47283	1	12.47	8.35	0.791	46.4	2	80	3	4	1	26.09	1522	0.033	8955.24	1	60
49947	2	12.91	18.12	1.172	46.4	2	70	4	2	2	36.31	1527	1.32	2241.55	1	59
10630	2	14.94	7.32	0.593	46.5	2	66	1	1	1	39.64	1063		1553.41	2	17
19670	2	8.12	6.09	0.996	46.5	2	75	4	4	1	50.84	861	1149	5054.45	1	27
24064	1	5.3	7.01	0.39	46.5	2	85	3	4	2	25.8	802	0.011	4329.35	2	30
42596	2	4.05	5.39	0.521	46.5	2	59	2	1	2	31.8	913	0.011	1780.1	2	72
50324	1	9.02	7.09	0.88	46.5	2	68	1	3	2	34.99	1024	8.36	2004.47	1	66
17297	2	10.99	8.82	1.029	46.6	2	85	3	3	2	25.7	1354	0.114	4698.13	2	27
24862	2	12.27	8.65	1.21	46.6	2	79	3	3	2	24.38	1039	35.5	13589.2	2	30
34127	2	6.17	5	1.258	46.6	1	85	3	4	2	27.07	758	0.011	4330.11	1	56
36642	2	17.47	6.45	1.14	46.6	1	84	3	1	1	25.72	1330	0.019	11444.3	2	46
36918	1	5.62	5.02	0.763	46.6	1	85	3	1	2	27.29	836	0.028	1657.49	1	45
18094	2	3.79	2.84	0.358	46.7	2	85	3	1	2	22.64	691	0.011	6201.6	2	21
18288	1	4.26	5.81	0.508	46.7	2	85	3	4	2	24.8	1498	0.011	3864.31	1	23
20757	2	29.5	19.47	1.195	46.7	1	62	3	5	2	33.13	1751	0.038	19653.5	2	15
21123	1	14.33	7.14	1.858	46.7	1	75	3	5	2	22.14	1352	0.011	6670.85	1	35
26804	2	7.58	3.51	0.789	46.7	2	75	4	1	2	44.04	1274	0.06	3659.45	1	36
27486	2	15.36	8.18	1.002	46.7	1	65	3	4	2	29.09	2243	0.357	5167.68	2	35
28422	2	20.67	6.09	0.754	46.7	1	85	3	4	2	28.13	1374	0.301	4644.43	1	32
30295	1	10.16	7.03	0.819	46.7	2	81	1	1	2	27.07	1151	0.02	1701.02	2	38
30302	2	14.29	9.78	1.161	46.7	2	53	4	2	2	21.61	3321	0.027	6173.59	2	31
47886	2	8.15	4.91	0.655	46.7	2	74	3	5	2	23	1202	339	7360.48	1	67
40824	2	27.16	12.73	1.803	46.8	1	71	3	4	2	26.69	2807	0.037	10263.8	1	44
45314	2	8.18	5.72	0.936	46.8	2	80	3	4	2	31.84	1978	0.123	7676.9	2	66
15048	1	6.56	4.2	0.502	46.9	2	83	3	4	2	26.53	1035	0.035	3634.91	2	18
17083	2	9.25	5.5	1.522	46.9	1	85	3	2	2		1445		2715.91	1	17
18019	2	10.72	4.03	0.589	46.9	1	85	3	2	2	20.11	1265	0.186	2795.67	1	14
27528	2	6.93	5.64	0.866	46.9	2	59	3	3	2	46.25	1192	0.395	7708.89	1	29
34058	2	9.67	5.2	0.638	46.9	1	71	3	3	2	25.13	1281	0.054	6702.67	2	50
35185	2	28.73	15.45	1.28	46.9	1	81	3	2	2	26.8	1614	0.044	7119.38	2	58
40540	1	8.48	8.72	1.013	46.9	1	82	3	4	2	28.52	1335	0.011	8590.8	2	53
46051	1	7.17	4.94	0.407	46.9	2	80	3	3	1	29.14	865	0.011	11528.6	2	63
47414	2	17.03	7.4	1.419	46.9	1	56	3	3	1	53.78	1958		4015.1	1	59
49573	1	9.9	4.26	0.424	46.9	2	80	3	4	2	23.72	1337	0.011	8054.36	2	64
23740	1	4.62	3.1	0.39	47	2	67	1	1	2	30.99	823	0.06	424.608	1	43
24583	2	7.85	7.17	0.562	47	2	63	3	3	2	26.03	1410	597	36847.6	1	42
33941	2	17.3	11.29	0.857	47	2	81	1	3	1	25.04	1598	0.011	1101.37	2	58
10411	2	10.68	6.2	0.848	47.1	2	85	4	4	2	33.55	1872	0.011	1862.45	1	27
25762	2	6.98	7.23	0.876	47.1	1	63	1	1	2	30.94	1261	0.011	551.888	2	40
28744	2	9.28	5.38	1.334	47.1	2	56	4	4	2	25.62	1672	0.052	7277.22	2	37
28886	1	4.56	2.66	0.517	47.1	2	80	3	4	2	26.25	973	56.3	6784.06	1	42
50380	1	7.69	11.34	0.875	47.1	2	76	3	4	2	42.93	1039	0.017	8298.67	2	62
51264	2	5.24	4.33	0.596	47.1	2	71	2	1	2	29.12	1035	0.011	1430.93	2	71
13370	2	7.21	4.37	0.989	47.2	2	83	3	3	1	38.14	1165	0.029	6864.23	1	14
21792	1	7.73	2.3	0.495	47.2	2	79	3	4	1	26.7	448		8194.72	1	35
27527	1	8.01	5.74	0.713	47.2	2	81	3	2	2	22.99	1217	0.578	9800.3	2	35
37270	1	14.57	7.71	0.633	47.2	1	85	3	1	2	26.73	1358	0.019	3922.45	1	53
39022	2	4.87	7.03	0.182	47.2	1	55	4	5	2	25.46	864	0.023	4651.36	1	51
46990	2	7.6	5.22	1.754	47.2	2	54	4	5	2	32.52	1208	0.019	11020.3	2	67
18271	1	7.94	4.27	0.488	47.3	2	73	3	3	2	24.48	1135	0.021	11512	1	21
23447	2	6.66	4.87	0.778	47.3	2	60	1	4	2	44.9	1604	0.061	3376.01	1	34
28662	2	16.19	9.68	0.95	47.3	2	61	3	4	2	28.43	1436	0.022	17500.5	1	38
41216	2	5.47	4.33	0.423	47.3	2	61	1	1	2	18.73	683	0.011	4073.69	1	56
45257	2	26.04	17.36	2.692	47.3	2	78	3	5	2	27.37	1909	0.011	11192.6	1	60
45333	2	4.01	4.93	0.329	47.3	1	57	3	3	2	24.05	813	392	10124.4	1	61
46145	1	10.95	7	1.238	47.3	2	80	3	5	1	23	1432	0.011	16616.3	2	66
48986	2	15.71	3.7	1.184	47.3	1	80	1	1	2	24.38	1332	0.011	1363.72	2	71
12896	1	21.47	7.57	0.741	47.4	2	68	3	5	2	30.33	1201	0.011	11451.1	2	19
31733	1	8.62	6.01	0.999	47.4	1	79	3	5	2	23.47	1261	0.05	7010.17	2	44
19096	1	5.7	4.43	0.632	47.5	1	84	4	2	1	27.21	761	0.035	2482.23	2	26
21537	1	5.95	4.33	0.516	47.5	2	83	3	3	2	30.14	1199	0.034	5755.09	2	31
22527	1	5.58	9	0.486	47.5	2	85	3	4	1	30.33	818	0.025	5315.38	2	35
30351	2	12.94	4.58	0.828	47.5	2	61	3	4	2	24.15	1496	0.036	19913.3	2	34
36975	2	17.88	6.1	0.728	47.5	1	75	3	5	2	25.31	1373	0.092	10297.9	1	51
41220	2	9.05	2.87	0.484	47.5	1	82	4	2	2	20.85	1572	0.127	2998.62	2	45
41715	2	8.36	5.77	1.006	47.5	2	74	3	3	2	24.33	1297	0.011	8655.29	1	62
44072	2	4.04	5.47	0.832	47.5	2	54	4	5	2	22.25	893	0.107	4226.09	1	63
45621	2	13.63	6.51	0.855	47.5	2	78	3	5	2	26.54	1299	0.027	8268.47	1	63
16254	1	10.76	4.33	1.09	47.6	2	74	1	1	2	31.97	1254	0.011	1559.12	1	28
21909	2	10.22	6.85	0.596	47.6	2	85	3	3	2	27.08	854	0.036	6249.6	1	33
46076	1	5.84	3.84	0.675	47.6	2	80	3	3	1	24.18	916	0.011	8880.55	2	62
46857	2	7.84	6.2	0.407	47.6	2	72	3	2	2	28.32	1191	0.025	9726.74	2	60
49654	2	10.59	7.98	1.221	47.6	2	65	3	5	2	27.25	995	0.017	10913.6	1	67
51378	2	9.29	5.94	0.62	47.6	2	63	1	2	2	25.51	1070	128	1591.9	2	65
14697	2	9.38	2.65	0.326	47.7	1	51	4	3	1	41	1764	135	4709.12	1	24
19584	2	6.55	5.91	0.66	47.7	2	73	4	1	1	37.17	950	0.658	4428.65	1	14
22069	1	19.08	4.09	0.741	47.7	2	85	3	1	2	24.95	1451	0.021	3349.08	2	40
27584	1	10.95	5.24	0.396	47.7	2	75	3	2	2	25.59	925	0.594	8231.01	1	30
29762	2	5.67	6.63	1.126	47.7	1	61	1	3	2	29.47	978	0.011	1601.12	1	40
37033	1	4.9	5.22	0.582	47.7	1	70	4	4	1	34.76	1133	0.018	1430.97	1	51
43399	2	8.16	5.44	0.918	47.7	2	58	4	3	2	32.57	1424	0.094	9759.46	2	67
44703	1	9.42	7.19	0.789	47.7	1	80	3	4	2	29.57	1905	0.011	5137.73	1	69
50974	2	4.81	4.37	0.332	47.7	2	71	2	1	1	31.23	878	0.03	2004.41	1	72
10950	2	5.79	3.63	0.462	47.8	1	85	3	5	2		645		2368.45	2	27
19073	2	5.32	4.58	0.436	47.8	1	51	4	4	2	37.46	1200	0.016	4916.82	1	15
23839	1	13.35	6.71	1.355	47.8	1	85	3	5	2	23.02	1058	0.011	4444.74	1	29
27418	1	14.26	10.06	1.391	47.8	1	85	3	5	2	24.74	1667	0.016	3618.59	1	41
28545	2	12.6	9.57	1.321	47.8	1	80	3	3	2	29.06	1190	0.011	2016.36	2	30
41398	1	6.28	5.31	0.73	47.8	2	59	3	3	1	44.89	1516	2.45	8460.26	2	47
47030	2	4.77	6.45	0.516	47.8	2	80	2	3	2	23.48	822	0.011	2592.46	1	72
51302	1	6.15	5.61	0.452	47.8	1	68	3	2	1	23.91	1178	229	6055.38	1	67
15797	2	4.33	2.25	0.316	47.9	2	61	3	3	2	40.74	610	244	11254.4	2	24
23816	2	14.6	6.61	0.879	47.9	2	62	4	4	1	36.75	1296		1931.26	2	39
37524	1	19.37	5.48	1.1	47.9	1	84	3	1	1	27.01	2036	191	3790.92	1	49
39093	2	4.1	4.65	0.857	47.9	1	60	3	5	2	31.2	1003	252	31683.6	1	56
41501	2	6.33	4.7	0.633	47.9	1	70	3	1	1	36.27	771	442	6978.26	1	59
44688	1	4.52	1.82	0.378	47.9	1	80	2	3	2	18.41	471	0.031	1477.55	1	72
44970	2	5.64	2.47	0.637	47.9	2	56	3	5	1	48.94	1099	0.011	15662.9	2	59
11586	2	7.26	3.72	0.766	48	1	68	4	2	1	27.25	1672	0.079	1361.73	2	24
14656	2	3.83	3.29	0.383	48	2	58	4	1	2		1522	30.5	3317.83	1	20
19716	2	12.1	12.34	0.745	48	2	57	3	2	1	48.37	907	0.035	7513	2	22
20120	1	17.1	3.85	0.712	48	2	72	4	2	2	31.37	1247		2059.71	2	25
45705	2	8.1	4.7	1.422	48	2	56	3	3	1	49.09	843		10855.4	1	64
47271	1	5.24	5.14	0.62	48	2	80	3	5	1	28.15	1043	31.1	13775.6	1	63
11097	2	5.92	3.65	0.491	48.1	2	62	4	2	2	27.12	925	0.153	1603.31	2	15
28416	2	9.98	5.62	1.032	48.1	1	84	3	4	2	27.08	1339	0.011	2298.38	1	31
32154	2	6.89	5.37	0.791	48.1	2	63	4	3	2	39.69	1303	0.022	4005.82	1	51
35558	1	3.67	2.52	0.572	48.1	2	84	2	1	2	18.83	752		8552.05	2	45
45369	2	17.85	7.18	1.287	48.1	1	80	3	4	2		1243		2266.98	1	65
12254	2	18.35	8.7	0.836	48.2	2	64	4	1	2	23.91	1315		6943.61	1	14
12674	2	7.65	5.61	0.58	48.2	2	65	3	3	2	26.88	1152	0.115	7550.12	1	21
27457	2	6.88	4.94	0.493	48.2	2	68	4	2	2	34.1	1265	0.08	2040.31	2	31
27810	2	9.29	6.46	0.916	48.2	2	71	1	2	1	28.1	1092	0.099	1804.2	1	34
31344	2	21.54	8.11	1.246	48.2	2	55	3	5	2	32.18	1331	0.011	11909.7	2	52
32615	1	6.34	5.01	0.628	48.2	2	64	1	1	1	28.97	1286	78.3	1620.03	1	57
43606	2	14.87	5.15	0.903	48.2	2	80	3	3	1	32.08	1354		16179.8	2	67
45437	2	8.02	8.56	0.477	48.2	2	61	1	1	2	33.66	1152	0.011	2726.18	2	72
45816	2	30.05	23.66	0.512	48.2	2	55	4	4	1	48.04	911	2.18	4487.67	1	68
13518	2	7.23	4.72	0.76	48.3	2	55	4	5	1		1285	389	3835.44	2	20
38143	2	28.61	8.28	0.753	48.3	2	60	5	1	2	26.15	1115	249	5759.95	2	50
39170	2	11.37	7.44	0.839	48.3	1	77	3	3	2	30.17	1028	0.099	13575.1	2	56
42211	2	15.95	9.88	0.735	48.3	2	61	3	5	2	25.57	1379	0.024	12633.1	1	67
11285	1	3.94	3.86	0.443	48.4	2	77	3	3	2	19.87	735	0.011	4436.66	2	23
11833	1	18.63	14.12	1.292	48.4	2	77	3	4	2	24.6	1833	0.027	9212.71	2	23
19162	2	10.4	10.78	0.817	48.4	2	61	3	4	2	40.05	1017	0.673	15110	1	23
19916	2	4.43	2.29	0.445	48.4	1	63	1	1	2	35.05	625	0.011	316.625	1	17
28768	1	11.58	7.2	1.346	48.4	2	74	3	3	1	28.53	1432	0.035	11581.3	2	34
31903	2	8.71	7.29	1.239	48.4	2	73	3	5	1	24.74	1635	0.011	12675.3	1	56
38933	1	20.91	14.22	1.651	48.4	1	85	3	1	2	21.83	1934	491	4447.4	2	46
47610	1	7.06	3.32	0.63	48.4	1	63	2	1	1	24.4	816	0.024	763.46	1	62
13620	2	13.22	8.27	0.477	48.5	2	73	3	2	2	28.38	1595	0.064	5965.44	1	23
32742	2	24.16	14.26	0.782	48.5	1	55	3	3	2	17.97	1266	223	5645.56	1	45
41868	1	17.39	10.97	1.061	48.5	1	78	3	1	2	29.9	2069	0.129	11718.7	2	60
49804	1	21.65	12.48	0.821	48.5	1	80	3	1	2	27.25	1043	0.023	4195.19	1	61
12570	2	4.26	3.96	1.094	48.6	1	55	3	4	2	30.74	1172	0.018	28314.6	2	21
24137	2	7.58	7.89	0.731	48.6	1	70	4	2	2	27.08	1363	0.049	2823.4	1	36
27391	2	11.4	20.15	2.176	48.6	2	55	3	4	2	26.4	2713	0.041	41927.5	1	38
39352	2	5.49	8.52	0.835	48.6	2	77	4	1	2	19.02	1126		11582.2	2	50
47163	1	6.47	6.22	1.028	48.6	2	80	2	3	2	28.31	1411	0.02	2162.29	1	62
16238	1	7.4	5.66	0.594	48.7	2	80	3	5	2	23.64	1063	0.011	6029.22	2	28
23490	1	5.94	3.45	0.382	48.7	2	77	4	1	1	35.91	714	0.047	4185.66	2	41
25938	2	6.28	6.31	0.581	48.7	1	70	3	4	2	31.83	1562	0.07	18315.5	1	31
36959	2	15.34	8.75	0.773	48.7	1	80	3	1	2	24.92	1520	0.326	2263.69	2	46
37874	1	23.68	8.63	0.867	48.7	2	81	3	3	2	25.11	1316	150	11474.3	2	47
51357	2	8.9	6.58	0.618	48.7	1	59	1	1	2	25.01	1406	0.011	1335.72	1	70
15238	2	6.73	3.88	0.801	48.8	1	56	4	2	2	22.47	1078	209	3601.12	2	16
16200	2	8.89	3.98	0.851	48.8	2	66	3	4	2	19.82	1288	0.011	21812	2	24
17150	2	10.92	8.7	1.952	48.8	1	54	4	4	1	28.86	1952	255	10663.4	1	16
19340	2	13.82	7.11	0.619	48.8	2	70	2	2	2	35.8	1400	0.16	2014.1	1	20
36713	2	7.72	5.74	0.955	48.8	2	70	3	4	2	22.63	1078	0.011	26165.5	2	48
42285	2	7.68	4.62	0.687	48.8	2	61	2	5	2	27.04	1147	0.011	1102.55	1	72
47962	1	7.24	4.24	0.774	48.8	2	80	1	1	1	23.74	996	0.011	2156.83	2	65
48320	1	7.92	3.83	0.517	48.8	1	78	2	1	1	24.81	1271	0.252	2633.3	2	62
12017	2	9.81	7.88	0.843	48.9	2	81	1	4	2	27.48	1143	0.011	2695.84	1	15
14753	2	6.66	3.52	0.798	48.9	2	80	3	4	1	39.56	1317	0.011	4359.71	2	19
21165	1	5.92	3.45	0.614	48.9	2	75	3	1	2	27.45	1924	386	13874.2	1	32
25828	1	8.85	5.69	1.024	48.9	2	81	3	5	2	24.05	1458	0.011	7115	1	29
28110	2	8.8	3.44	0.328	48.9	1	53	4	2	2	22.79	1537	0.459	5467.42	1	30
40475	2	13.75	3.57	0.391	48.9	2	51	4	3	2	24.79	927	171	2647.96	2	45
50558	2	7.89	4.09	0.825	48.9	1	79	1	1	2	25.57	1032	0.011	2539.87	1	66
10154	2	6.95	5.24	0.756	49	2	72	4	4	2	26.9	1277	0.159	3751.59	2	14
20689	2	6.65	8.82	0.397	49	1	64	3	3	1	31.23	829	288	15740.3	1	26
21111	1	8.08	3.77	0.444	49	2	85	2	1	2	24.62	1296	0.026	4946.51	2	35
21433	2	7.76	3.71	1.028	49	2	66	3	4	2	24.06	808	0.204	24023.6	2	42
50605	2	4.9	7.46	0.348	49	2	64	4	4	2	31.57	1132	0.39	2417.81	1	71
11694	2	8.52	4.93	0.575	49.1	2	57	4	5	2	18.35	1076	123	5303.6	1	20
11828	1	10.46	7.58	0.351	49.1	2	84	3	4	2	24.44	1310	0.035	16787.1	1	26
12164	1	10.16	5.46	1.085	49.1	2	84	3	4	2	22.2	1567	0.011	4799.5	2	24
20884	2	6.62	7.21	1.305	49.1	2	82	3	4	2	25.16	1164	0.011	3234.35	1	19
21635	1	8.41	4.13	0.623	49.1	2	65	5	4	1	37.3	1367	0.06	8358.98	2	34
21958	2	23.43	3.01	0.426	49.1	2	80	4	4	2	25.04	827		12162.9	1	38
23224	2	11.06	6.46	1.082	49.1	1	61	3	2	2	27.27	1500	0.12	9411.98	1	38
24611	1	5.84	4.55	0.625	49.1	2	81	3	3	2	24.7	997	0.153	5109.16	2	32
31294	2	13.83	9.82	0.569	49.1	2	73	3	4	2	25.94	958	0.011	20089.3	1	48
36725	2	10.27	5.27	0.965	49.1	2	69	3	3	2	29.6	1201	0.039	20551.9	1	54
42220	2	7.85	6.09	0.908	49.1	1	69	3	4	1	28.57	1300	0.011	13662.1	1	60
45472	2	7.23	7.53	0.793	49.1	2	77	2	1	2	30.5	1032	0.011	3359.25	2	65
48715	1	5.75	3.44	0.667	49.1	2	73	1	1	1	27.65	790	0.011	2186.38	2	65
49827	2	11.03	3.66	0.491	49.1	2	76	3	1	2	25.35	1167	49.4	4309.49	2	59
21300	1	7.42	4.91	0.676	49.2	2	83	3	3	2	29.8	1082	0.011	4165.52	1	29
22488	2	18.21	13.29	1.795	49.2	2	63	3	1	1	39.24	1079	0.888	12264.3	2	34
35620	2	26.26	5.71	1.086	49.2	2	83	3	4	2	27.73	1766	0.025	6304.03	1	55
41946	2	13.22	5.68	0.562	49.2	2	65	4	3	2	32.26	1094	0.041	1889.49	2	64
45243	1	6.75	7.75	0.581	49.2	2	76	3	2	2	23.19	1089	0.011	11524.6	1	61
50989	2	20.49	6.1	1.064	49.2	2	62	2	5	1	33.54	1492	0.011	843.598	2	73
20870	1	12.47	8.43	0.287	49.3	1	85	3	1	2	22.58	1334	0.052	2315.81	1	26
35689	1	24.03	13.84	1.505	49.3	2	71	3	1	2	26.49	1625	0.072	8618.88	2	46
36586	2	8.18	10	0.695	49.3	1	76	4	1	1	30.51	965	11.8	5461.29	2	53
37510	2	14.73	11.67	1.345	49.3	1	73	3	5	2	27.62	1885	0.035	10838.8	2	52
49243	2	15.63	12.26	1.356	49.3	2	62	3	1	2	22.88	1483	552	6482.92	1	67
11733	2	15.43	11.89	1.523	49.4	1	70	3	5	2	20.73	1896	0.053	6363.68	1	27
26359	2	7.68	4.63	0.616	49.4	2	72	5	3	2	19.4	1469	13.1	7758.39	1	38
33675	2	10.98	7.08	1.201	49.4	2	56	3	4	1	38.29	1298	0.011	10859.3	2	53
41705	2	12.01	3.95	0.738	49.4	1	62	4	3	2	23.29	1703	75	3364.91	2	59
45646	2	8.4	6.77	0.613	49.4	2	52	4	3	2	38.98	1228		12412.1	2	71
45922	2	6.54	5.2	0.981	49.4	2	63	1	1	1	36.57	1228	0.011	3783.98	1	66
12733	2	11.13	9.63	0.516	49.5	2	58	2	2	1	23.68	870	0.025	26946.2	2	27
29207	2	21.33	6.96	1.117	49.5	2	53	4	3	2	34.8	1420	0.011	3892.94	2	31
39246	2	7.94	2.77	0.533	49.5	2	85	3	2	2	32.65	1196	0.011	11712.4	2	55
49255	2	5.61	2.97	0.84	49.5	2	65	4	3	2	28.84	825	68.4	2436.96	1	63
20153	2	9.56	5.75	0.702	49.6	2	79	3	3	2	29.36	1472	0.011	10687.7	1	23
26544	2	7.45	5.22	0.71	49.6	1	81	3	4	1	23.44	1287	0.057	4444.74	1	29
38738	2	6.08	4.4	0.493	49.6	1	59	1	1	2	30.78	926	0.035	1766.04	1	58
41755	2	14.63	12.46	1.367	49.6	2	79	3	2	2	25.79	1399	113	7360.48	1	67
48265	2	7.25	3.06	0.362	49.6	2	61	3	3	2	28.82	1521	116	22574	1	67
12126	2	8.02	7.16	0.801	49.7	1	60	1	1	2		1249	0.074	638.93	2	15
34254	2	9.57	7.11	1.025	49.7	2	51	4	2	2	46.64	1602	0.086	3420.4	2	51
42591	1	8.56	5.81	0.761	49.7	2	68	4	5	2	23.65	1476	0.011	2167.93	1	72
49294	2	12.34	10.65	1.644	49.7	2	59	3	5	2	20.05	1426	153	17161.1	1	71
22723	1	8.46	4.03	0.532	49.8	1	81	3	3	2	23.56	1499	172	3556.59	1	29
24400	1	8.91	7.62	0.82	49.8	2	63	3	4	2	29.55	1804	0.686	14446	2	34
27579	1	12.78	13.6	1.498	49.8	2	85	3	5	2	20.7	1329	0.011	4258.36	1	35
11177	2	7.34	10.82	0.765	49.9	1	83	3	1	2		798	23.1	4367.33	1	23
14940	2	6.21	5.7	0.9	49.9	2	69	4	4	2	28.75	1416	0.021	4294.22	1	14
15819	2	7.14	9.96	1.062	49.9	1	77	2	1	2		1664	0.199	5838.43	2	27
22893	1	25.91	21.79	0.988	49.9	1	85	3	1	1	20.11	1388	0.011	5795.32	2	34
28332	1	4.35	3.16	0.295	49.9	2	77	1	1	2	21.44	572	0.293	1871.04	1	34
37829	2	18.82	3.83	0.86	49.9	2	74	4	2	2	27.34	1206	0.022	3787.06	2	54
39379	2	4.76	2.91	0.496	49.9	2	67	1	1	2	36.03	919	0.011	519.898	1	58
42960	2	6.6	6.02	0.95	49.9	2	59	3	3	2	24.75	1193	0.016	44476.9	1	60
45628	2	15.81	11.47	1.044	49.9	2	69	1	1	1	34.58	1544	227	3159.94	2	66
48788	2	5.97	3.88	0.538	49.9	2	60	3	5	2	47.17	1134	0.021	11490.7	2	63
13888	2	8.07	5.82	0.683	50	2	59	1	4	2	33.56	1560	0.044	12530.5	2	24
18989	1	7.25	11.58	0.62	50	1	59	4	3	2	26.25	1647		4704.53	1	27
28228	2	11.92	13.1	1.957	50	2	60	3	5	1	28	1322	178	9088.63	2	39
28835	2	23.25	7.11	0.781	50	1	78	4	3	2	24.79	1621	414	4804.6	1	30
34965	2	9.22	5.26	1.21	50	2	59	1	1	1	21.83	909	0.011	1731.57	1	58
36697	2	39.54	29.8	1.916	50	1	81	3	5	2	27.22	2369	0.03	5672.29	1	56
42405	2	22.63	18.7	1.399	50	2	71	3	3	2	29.05	1400	0.011	5192.89	2	64
42949	2	7.4	5.2	1.189	50	2	60	3	4	2	28.68	1252	0.011	16865.5	1	67
43077	2	4.67	2.82	0.543	50	2	62	1	2	2	32.22	645	0.011	1642.44	1	71
22122	2	10.24	9.55	1.062	50.1	1	72	3	3	2	30.2	1215	0.078	9441.45	2	34
26267	2	9.16	4.5	0.993	50.1	1	63	4	5	2	30.28	1256	0.37	3935.33	1	42
31622	2	6.26	3.26	0.632	50.1	2	71	4	3	2	30.21	993		5236.42	2	50
32075	2	18.93	11.51	0.906	50.1	2	85	3	3	2	26.25	1347	0.043	5028.34	2	44
42127	2	12.61	11.09	1.055	50.1	2	60	2	2	2	28.77	1741	0.098	1389.6	1	60
42165	1	4.88	5.63	0.249	50.1	1	67	4	1	2	36.16	641	400	1944.01	1	59
13556	2	6.09	7.36	0.538	50.2	1	72	2	1	2	20.83	1161	3.58	13345.8	2	27
22646	1	8.51	7.74	0.686	50.2	1	72	3	2	2	18.26	1762	1.2	8293.62	2	32
23265	1	7.47	8.31	0.775	50.2	2	78	3	4	2	26.28	1749	0.028	17151.7	2	31
24900	2	19.27	6.1	0.822	50.2	2	58	1	1	2	27.43	1683	0.067	2658.1	1	34
29321	1	17.78	10.04	0.735	50.2	2	85	3	3	2	27.15	1251	0.011	4227.15	2	39
36484	2	19.11	12.98	1.016	50.2	1	85	3	3	2	25.03	1428	0.011	11862.1	2	54
45114	1	14	5.84	1.391	50.2	1	80	3	5	2	24.92	1570	0.019	9025.26	2	60
19972	2	11.61	6.58	0.931	50.3	2	64	3	5	2	26.89	1569	0.016	18590.9	2	14
36331	2	13.63	10.57	0.784	50.3	2	85	3	2	1		1245	0.035	9982.36	1	47
50752	2	26.93	10.79	1.086	50.3	1	70	3	4	2	23.13	1716	0.024	6483.69	2	64
10037	1	7.62	11.48	0.504	50.4	2	85	3	1	2	37.39	525	0.035	8480.85	1	18
12838	2	8.16	4.94	1.415	50.4	2	64	4	4	2	24.73	1432	0.035	1672.09	1	24
13643	2	5.15	4.3	0.548	50.4	1	70	4	2	2	30.65	915	11.1	1331.38	1	24
15863	2	8.66	5.09	8.377	50.4	2	81	4	2	2	26.27	719	129	10377	1	26
33260	2	10.14	3.78	0.409	50.4	1	67	3	2	2	28.54	784	0.052	6198.47	2	51
41915	2	7.18	5.8	0.661	50.4	2	63	3	5	2	26.65	1609	0.011	18920.1	2	62
43635	2	5.24	2.98	0.6	50.4	2	64	1	1	2	29.91	1042	0.302	1025.53	1	71
45556	2	7.21	3.71	0.852	50.4	2	56	3	4	2	21.9	1318	505	31660.1	2	64
45777	2	6.35	7.77	0.664	50.4	2	67	3	5	2	24.59	921	0.025	10963.8	2	66
46800	2	10.2	11.76	1.421	50.4	1	68	3	5	2	31.69	1785	0.021	19617.9	1	63
25081	2	12.74	11.33	1.239	50.5	1	65	3	4	1	34.69	1665	0.032	9110.68	2	40
27661	2	7.2	2.54	0.453	50.5	2	58	3	2	2		779	542	14718.6	2	31
29286	2	12.18	10.18	0.919	50.5	2	62	3	3	2	24.19	1560	0.063	34048.8	2	32
45754	1	8.26	32.33	2.066	50.5	1	65	3	5	2	37.43	634	0.081	6721.02	2	72
50074	2	16	12.57	1.322	50.5	2	66	1	3	2	28.86	1170	0.021	1172.04	2	72
17771	2	9.93	5.47	0.893	50.6	2	53	4	5	1	30.36	1376	267	4930.99	1	20
37293	2	6.46	2.28	0.561	50.6	2	72	4	3	2	35	1021	0.016	6497.49	1	51
44201	2	16.99	12.59	1.418	50.6	1	76	3	4	2	21.02	1876	0.011	4513.59	2	59
50934	1	21.79	5.92	0.756	50.6	2	76	3	4	2	25.57	1080	267	6958.08	2	60
10886	2	5.03	5.23	0.708	50.7	2	68	3	2	2	32.17	1164	0.201	15509.5	1	22
13639	2	8.46	4.62	0.775	50.7	2	71	4	1	2	30.77	1113		2276.99	2	25
14074	2	7.56	6.51	0.697	50.7	2	83	3	4	2	26.86	1085	0.035	7449.78	1	18
17265	2	26.91	10.43	3.483	50.7	1	58	4	2	2	20.26	1091		6145.8	1	14
27642	2	6.94	7.31	0.471	50.7	2	57	5	4	2	24.09	2173	4.76	8022.39	1	38
29989	2	7.16	10.04	0.569	50.7	2	63	4	3	2	33.7	1328		5315.66	2	29
43433	2	8.09	7.92	1.457	50.7	2	55	3	4	2	21.77	1911	0.011	18667.6	1	69
44788	2	36.6	21.02	1.398	50.7	1	80	3	3	2	26.08	1055	0.045	5995.46	2	67
45492	1	5.84	3.57	0.705	50.7	1	78	1	1	2	32.21	870	0.026	2167.88	2	64
48006	2	17.7	15.95	1.254	50.7	1	78	3	3	1	28.73	1231	0.021	8546.39	1	67
12181	1	5.39	7.48	0.393	50.8	2	60	4	2	2	30.09	1152	170	6206.88	2	20
16938	2	14.53	7.56	0.966	50.8	2	66	1	4	2	27.88	1119	0.011	1104.7	2	17
26916	2	10.43	6.46	0.902	50.8	1	68	3	5	1	24.63	1827	217	31054.5	2	34
31795	2	10.13	6.77	1.164	50.8	2	60	1	1	2	24.7	1214	0.011	3974.5	2	58
33960	2	9.37	10.66	1.282	50.8	2	59	4	2	2	50.22	2346	0.018	2098.16	2	45
44116	1	9.91	6.18	0.889	50.8	2	80	1	1	2	21	742	0.017	2331.6	2	66
45278	2	6.8	3.91	0.59	50.8	1	69	3	4	2	34.08	989	0.011	15651.8	2	60
10903	2	15.53	14.53	0.682	50.9	2	66	1	1	2	29.34	1481	0.341	473.282	2	25
11676	1	17.35	6.64	0.766	50.9	2	85	3	4	2	22.91	1294	0.035	5144.6	2	26
11959	2	14.64	4.31	0.44	50.9	2	67	3	3	2	46.48	1249	123	13539.6	1	26
12553	1	17.3	39.24	3.747	50.9	2	64	3	2	2	24.47	2419	0.035	21891.8	2	23
20520	2	6.75	4.27	0.635	50.9	2	71	3	3	2	33.08	967	0.011	12181.7	2	20
24181	2	7.94	4.91	0.73	50.9	1	85	4	4	2	21.87	1233	0.028	1529.23	1	41
28800	2	10.27	5.08	0.502	50.9	1	85	3	2	2		889	0.015	2315.13	1	29
32211	2	14.91	11.42	0.738	50.9	1	55	3	4	2	27.68	1435	0.011	45629.6	2	55
37793	2	9.21	10.17	0.861	50.9	1	61	1	4	2	26.39	2279	0.039	733.46	2	56
43749	2	8.84	6.56	0.538	50.9	1	63	2	3	2	21.04	1220	203	1223.89	1	72
49906	2	13.62	4.6	0.56	50.9	1	73	3	1	1	30.16	1146	146	1861.47	1	67
13507	2	5.72	4.26	0.606	51	1	57	3	5	2	29.74	1063	0.639	22201.4	1	23
18799	1	24.67	20.48	0.6	51	2	84	3	3	2	21.78	1052	0.011	4187.77	2	16
28427	2	6.91	7.13	0.865	51	2	81	1	1	2		1261	0.011	948.439	1	34
35053	2	5.44	4.82	0.619	51	2	80	3	5	2	27.02	871	0.018	12643.4	1	57
37413	2	11.26	4.7	0.644	51	2	62	1	4	2	31.56	1161	0.011	5828.73	2	55
46376	2	17.64	6.76	1.431	51	2	80	5	3		25.3	1210	0.25	6713.88	1	60
47699	2	13.07	5.61	0.486	51	2	71	4	2	2	16.87	1123	367	4541.95	1	64
49177	2	13.83	6.68	0.749	51	2	63	1	2	1	43.14	1061	0.019	1553.67	2	64
50067	2	26.39	17.48	1.453	51	1	74	3	5	2	24.76	1512	0.02	11572.6	1	60
51024	2	6.62	6.46	1.244	51	2	74	4	2	2	30.12	1383	0.03	5054.02	1	59
15067	2	8.39	3.34	0.834	51.1	1	81	3	3	2		1939		2373.26	2	21
17559	2	14.3	15.2	0.602	51.1	1	85	3	4	2		1139	0.011	5156.64	2	19
20922	2	7.45	5.35	0.897	51.1	2	55	1	3	2	24.7	1101	239	2274.97	2	23
35120	2	5.05	5.92	0.434	51.1	1	76	4	1	2	33.07	1011	0.547	1686.51	2	48
43934	1	6.55	4.95	0.58	51.1	1	80	3	3	2	33.7	1250	0.023	4363.47	1	70
46368	2	14.66	6.92	0.846	51.1	2	68	2	5	2	33.52	1056	0.011	1686.85	1	72
47265	1	6.81	4.29	0.756	51.1	2	69	2	3	1	25.69	884	0.015	1961.08	2	66
11092	2	14.58	9.27	0.824	51.2	1	66	3	5	2	27.25	2001	0.011	13067.8	2	19
12585	2	15.59	5.3	0.705	51.2	2	81	3	3	2	29.9	1107	0.016	2495.7	1	17
17860	2	7.71	8.09	0.82	51.2	2	82	3	3	2	25.53	1159	0.011	7761.3	2	18
17861	2	6.37	4.47	0.846	51.2	2	68	1	2	1	28.66	1028	55.6	1035.75	2	23
32328	2	9.11	7.05	1.122	51.2	2	81	3	4	2	23.7	2295	0.011	9260.14	2	50
33625	2	18.43	15.25	0.486	51.2	2	81	3	3	2	25.15	1104	0.011	6556.97	1	52
35087	2	6.89	5.57	0.928	51.2	2	60	3	5	2	30.03	1100	0.08	19056.3	1	55
42738	2	9.19	3.85	1.001	51.2	1	75	1	3	2	22.67	1091	0.016	1695.15	1	66
49120	2	5.64	6.89	0.705	51.2	2	60	3	3	2	21.47	1444	163	11062	1	67
50029	2	14.72	7.55	0.761	51.2	2	65	1	1	1	31.47	879	0.011	1289.82	2	66
11557	1	12.09	10.08	0.918	51.3	2	81	3	3	2	17.74	1436	0.019	3259.17	1	17
13205	1	16.71	9.41	1.502	51.3	2	68	3	5	2	24.93	1856	0.011	10185.4	1	16
17637	2	9.75	6.08	1.401	51.3	1	52	4	4	1	29.39	1326	0.117	10692.5	2	20
27942	1	8.17	10.77	1.124	51.3	2	82	3	4	2	27.26	1539	0.026	5795.87	2	39
32530	2	9.3	5.78	0.552	51.3	2	72	3	4	2	22.85	822	0.025	18977.9	1	49
32984	2	14.07	5.32	1.651	51.3	1	64	4	2	1	20.68	1589	419	2166.81	2	54
33982	1	4.34	2.59	0.382	51.3	2	85	3	3	2	26.72	802	0.015	9200.28	2	52
38611	1	10.32	5.45	0.62	51.3	1	77	4	3	2	35.72	1337	189	4423.43	1	48
41699	2	4.6	4.78	0.37	51.3	1	51	4	4	1	41.12	683	0.024	3965.88	1	65
42772	2	12.14	6.55	0.491	51.3	2	65	3	3	2	36.37	1067	0.024	5387.68	1	64
45147	2	5.62	8.64	0.428	51.3	1	72	1	3	2	26.92	587	0.477	2248.9	1	66
48496	2	9.79	10.21	1.069	51.3	1	58	4	4	1	27.98	1643	0.27	2882.98	1	63
50055	2	9.34	3.24	0.52	51.3	2	79	4	2	2	27.38	1453	0.023	3654.41	2	67
11948	2	16.34	5.37	1.534	51.4	1	71	5	4	2	23.7	1421	0.021	3780.72	2	17
12061	2	7.55	4.9	0.695	51.4	2	60	3	4	1	24.07	1173	97.6	18298	1	26
19445	1	6.46	2.85	0.677	51.4	2	80	1	1	1	18.99	762	0.303	1219.28	2	27
30072	2	34.75	7.07	0.715	51.4	2	60	1	4	2	29.48	1385	0.011	711.647	1	34
38348	2	8.89	7.91	1.073	51.4	2	56	4	4	1	21.78	989	0.011	3791.34	2	45
44637	2	9.28	4.55	0.922	51.4	1	63	4	2	2	22.99	1605	0.019	2691.05	1	59
45171	2	16.92	8.87	0.682	51.4	1	61	3	4	2	25.06	1195	0.042	12202	2	70
48193	1	19.13	12.63	1.574	51.4	1	80	3	3	2	28.7	1845	0.011	4443.97	1	59
48453	2	20.37	4.81	0.582	51.4	2	69	3	2	2	29.47	2192	0.098	16486.9	2	61
48504	2	7.58	8.9	0.501	51.4	2	70	3	2	1	20.78	1382	414	6719.17	2	63
49641	2	17.14	13.92	1.633	51.4	1	68	3	5	1	29.22	1870	0.043	14529.9	2	67
32416	1	22.84	4.45	0.613	51.5	1	83	3	1	2	28.04	1067	0.041	1544.95	2	50
34502	2	11.31	8.17	1.432	51.5	2	56	3	5	2	20.14	1469		37606.8	2	49
37492	1	7.47	11.52	0.423	51.5	1	75	4	1	1	52.02	923	0.076	1600.34	1	55
42449	2	24.98	7.53	1.701	51.5	1	80	3	1	2	23.75	2586	0.079	5022.22	1	59
21643	2	7.33	4.88	0.581	51.6	2	62	1	1	2	31.96	1084	1.64	952.346	1	38
22477	1	8.97	6.23	0.837	51.6	2	75	3	3	2	28.71	1391	0.04	8681.76	2	30
23163	2	8.49	5.26	1.039	51.6	2	84	3	4	2	25.72	1377	0.021	3328.54	2	29
35827	2	8.96	4	0.829	51.6	1	53	4	2	2	17.1	1229	0.875	16079.6	2	44
49150	1	21.34	16.48	1.015	51.6	2	61	3	3	1	25.94	1322	83.6	14086	1	67
21228	2	11.16	7.06	1.349	51.7	2	63	5	4	2	18.61	1222	0.086	20462.9	1	43
22177	2	18.5	5.39	0.873	51.7	1	83	3	2	2	24.95	1668	0.109	4678.2	2	35
31808	1	4.82	4.14	0.365	51.7	1	79	3	5	2	21.53	830	1.71	2946.94	1	56
32113	2	6.41	5.56	0.874	51.7	2	62	1	2	2	32.89	1448	0.011	770.136	2	58
43469	2	5.64	7.19	0.922	51.7	1	78	3	3	2	29.49	2391	0.011	2583.5	1	60
45343	2	7.09	5.84	1.144	51.7	1	78	3	5	2	29.97	1148	0.068	14105.3	1	69
47389	2	9.16	5.52	0.992	51.7	1	60	4	3	2	22.48	1495	0.018	2734.57	1	68
10663	2	10.02	8.95	0.764	51.8	2	56	3	2	1	45.92	916	39.7	12198.7	1	23
17145	2	9.23	6.37	1.343	51.8	1	73	3	5	2	26.98	1698	0.011	13370.5	2	19
17922	2	8.54	3.75	0.535	51.8	2	64	3	3	2	18.95	1008	0.025	6529.42	1	22
25879	2	7.31	4.17	0.595	51.8	2	62	4	4	2	27.66	1286	154	7073.38	1	36
37105	2	15.49	4.78	1.082	51.8	2	56	3	5	2	21.84	1166	0.011	15334.5	1	54
37498	2	16.12	6.23	0.475	51.8	2	85	4	1	2		1373	516	7091.91	2	51
37653	1	10.95	7.66	0.714	51.8	2	82	3	4	1	27.27	1924	0.018	6177.77	2	47
23413	1	14.68	6.74	1.093	51.9	2	78	3	4	2	29.48	1690	0.116	5561.6	2	30
24642	1	16.93	10.12	1.048	51.9	2	85	3	3	2	24.84	1230	0.149	4433.73	2	31
25665	1	8.23	7.58	0.76	51.9	2	85	3	3	2	26.65	1429	0.011	5212.89	1	31
34574	2	7.56	6.85	1.001	51.9	2	57	3	4	2	35.64	1591	284	6886.15	2	50
38559	2	12.42	6.51	1.379	51.9	2	67	3	4	2	57.31	1488	0.011	30971.5	2	54
39323	2	14.36	7.59	1.141	51.9	1	63	3	5	2	29.34	1822	0.031	19239.7	1	45
44361	1	12.72	9.08	1.167	51.9	2	75	3	5	2	29.44	1606	0.062	7946.6	1	67
46232	2	11.53	10.94	0.914	51.9	1	58	2	3	2	35.4	2939	0.011	7963.18	2	65
46531	2	7.34	4.24	0.679	51.9	1	69	4	2	1	38.38	1127	0.967	1561.75	1	59
25656	2	8.44	2.61	0.646	52	1	68	1	1	2	24.65	1000	6.02	1592.15	1	40
28666	2	9.19	5.73	0.682	52	1	75	1	1	2	26.3	1272	0.021	799.428	1	43
33086	2	6.56	2.78	0.547	52	1	56	3	5	2	26.52	2367	0.011	33475.4	1	55
33316	1	6.05	21.03	1.412	52	1	74	3	3	2	24.87	1243	0.155	4015.55	2	53
33959	1	5.84	7.59	0.799	52	2	81	3	2	2	25.7	1282	0.186	7100.68	1	47
40518	2	9.86	13.4	1.103	52	2	62	3	3	2	47.88	2400	0.07	8672.29	1	44
50833	2	5.69	4.52	0.668	52	2	60	2	1	1	31.72	1114	0.407	1198.79	2	61
20554	1	4.07	4.56	0.735	52.1	2	72	3	2	2	30.45	837	268	7259.43	1	21
25180	2	9.56	8.71	0.791	52.1	2	79	1	1	2	28.16	1043	0.011	1452.94	1	34
48917	2	19.65	11.29	0.585	52.1	1	80	3	2	2	31.67	1633	145	2327.6	1	65
10326	2	34.96	5.1	0.98	52.2	2	72	1	1	1	28.92	1651	0.011	917.373	1	22
29808	2	9.69	9.03	0.78	52.2	1	57	3	4	2	34.2	1351	0.026	6549.41	2	35
31947	2	5.74	5.25	0.685	52.2	2	61	4	2	2	35.55	1195	0.184	3530.27	2	49
39126	2	43.33	36.92	1.517	52.2	1	66	3	3	2	31.55	2169	0.011	17951.1	2	44
39553	2	10.06	5.34	0.513	52.2	2	70	3	4	2	31.79	1060	0.011	7878.58	2	44
40165	1	5.92	9.05	0.717	52.2	2	85	3	5	1	26.65	1045	0.011	11575.4	2	46
40369	2	6.73	5.33	0.508	52.2	1	67	3	3	2	21.73	1449	0.011	17951.1	2	44
46392	1	7.36	4.23	0.741	52.2	1	69	2	1	1	23.94	969	367	1308.79	1	72
50109	2	7.86	7.75	0.757	52.2	1	75	3	1	2	27.27	1353	0.122	1851.55	1	59
13290	2	10.58	6.27	0.946	52.3	1	57	3	3	2	29.53	2116	825	11137.7	1	26
30249	2	13.97	10.73	0.914	52.3	1	68	3	5	2	29.75	2836	0.053	11084.9	2	37
39459	1	6.38	4.08	0.919	52.3	1	81	3	1	2	26.45	1315	0.023	8947.73	2	48
41053	1	26.18	7.12	0.746	52.3	1	75	3	1	1	27.63	1879	3.27	5925.18	1	45
45488	1	8.9	8.22	0.929	52.3	2	80	2	1	2	25.85	1095	0.011	1447.17	1	62
47432	2	4.84	5.31	0.642	52.3	2	58	3	5	2	30.72	691	0.026	20178.3	2	60
39034	1	7.87	5.86	0.556	52.4	1	80	3	4	2	28.38	1195	0.017	8062.98	2	47
40575	1	20.35	5.57	0.821	52.4	1	85	3	3	2	28.48	1310	0.036	3533.42	2	44
43743	2	14.74	6.24	0.647	52.4	1	80	3	5	1	29.36	1303	0.044	6300.27	1	63
45009	2	15.17	6.94	0.637	52.4	2	60	3	2	1	30.39	1006	3.98	6599.37	1	67
47186	2	7.29	4.98	0.655	52.4	2	60	4	5	2	23.3	1020	758	2685.33	1	68
11426	2	4.79	6.4	0.325	52.5	1	75	4	1	2	25.45	1159	0.688	1486.63	1	16
33207	2	4.86	5.42	0.637	52.5	2	62	3	2	2	21.22	1646	331	49871.4	1	56
48616	2	4.47	5.51	0.761	52.5	2	62	3	4	2	26.37	1249	0.011	5756.68	2	63
25526	2	8.31	2.75	0.502	52.6	2	64	3	1	2	26.25	1137	0.011	31608.5	2	34
27521	2	6.57	6.4	0.694	52.6	2	66	3	2	1	34.25	1029	0.058	5589.94	2	35
27910	1	9.54	9.24	0.775	52.6	2	71	3	2	1	32.28	1358	0.023	23170.7	2	34
28769	1	6.82	5.67	0.852	52.6	2	77	3	2	2	33.14	1187	0.13	8704.04	1	30
29028	2	5	9.3	0.286	52.6	2	55	4	4	2	24.74	1008	0.011	14975	1	39
31019	2	6.13	4.08	0.862	52.6	2	71	1	1	1	52.36	1178	0.011	1175.4	2	40
43690	1	3.85	4.19	0.872	52.6	1	77	4	1	1	42.42	994		2274.5	2	67
50531	1	10.77	8.65	0.812	52.6	1	80	3	4	2	26.38	1227	0.019	3748.76	1	60
10901	1	8.18	9.24	0.708	52.7	1	72	4	4	2	20.06	1048	228	2209.57	2	28
12834	2	7.34	5.21	0.877	52.7	2	70	1	1	2	27.56	1482	0.011	2439.28	2	22
20872	2	9.8	5.18	0.84	52.7	2	66	3	5	2	23.09	1377	0.021	15960.4	1	19
28102	2	7.68	7.3	0.961	52.7	2	77	3	2	1	30.98	1121	0.056	12435.6	1	42
34040	1	11.98	5.14	0.613	52.7	2	84	3	4	2	27.21	923	0.011	15701	2	44
41575	2	15.42	5.21	0.509	52.7	1	76	1	1	2	27.77	1448	0.018	1767.35	2	71
41783	1	8.63	5.31	0.837	52.7	2	80	3	5	2	26.65	1544	0.094	7840.45	1	67
44255	2	16.61	6.83	1.121	52.7	2	60	3	5	2	30.94	1527	0.015	20686.4	2	63
47972	1	7.15	8.29	0.618	52.7	2	67	3	2	2	29.64	749	0.074	8834.16	2	59
49847	1	9.58	11.75	0.786	52.7	1	72	3	1	2	27.96	1443	142	2490.26	2	59
50332	2	11.4	5.64	0.591	52.7	1	60	4	3	2	22.36	1379	371	3291.06	1	59
50696	2	6.7	3.08	0.647	52.7	1	70	4	4	2	24.04	759	0.048	1732.73	1	64
27129	2	10.01	9.48	0.931	52.8	2	72	3	4	2	28.1	1910	0.011	9924.19	2	30
30215	1	13.49	8.65	1.036	52.8	1	71	3	2	1	26.84	1145	0.011	6808.61	1	39
43593	2	7.82	7.18	1.634	52.8	1	58	4	3	2	28.05	1939	0.011	3352.67	2	71
46217	2	14.95	6.33	0.855	52.8	2	55	1	4	2	34.29	1575	92.8	7280.69	1	66
47210	2	16.49	7.36	0.641	52.8	2	80	4	5	1	29.68	963	0.084	3415.33	1	67
50052	2	7.66	10.59	0.476	52.8	2	64	3	4	2	32.02	1637	0.124	4410.89	1	67
10133	1	48.24	42.11	0.781	52.9	1	84	3	4	2	28.34	1372	0.035	6556.26	2	16
12092	2	15.34	8.71	1.221	52.9	2	70	3	4	2	22.47	1361	0.011	6674.17	1	14
23116	1	19.62	15.46	0.66	52.9	2	81	3	4	2	27.66	1064	0.034	4498.75	1	41
28836	2	15.19	7.09	1.193	52.9	2	60	4	5	2	25.38	2484	0.016	3055.75	1	36
40545	1	20.67	11.3	1.277	52.9	2	78	3	4	2	19.91	1241	0.049	17000.2	1	53
45252	1	10.18	6.18	0.917	52.9	2	80	3	2	2	19.38	927	0.011	13067.4	2	67
45298	2	8.76	5.39	1.161	52.9	2	67	3	2	2	32.24	1310	0.07	10143.7	1	61
46372	2	13.44	11.57	1.047	52.9	2	62	3	4	2	24.24	1345	0.016	10278.8	2	74
46452	2	8.27	4.69	0.769	52.9	1	67	3	3	2	24.86	1190	0.033	4920.49	2	62
51395	2	7.41	4.47	0.688	52.9	2	56	4	5	1	36.54	921	87.7	4198.95	1	64
12510	2	4.89	5.14	0.527	53	2	65	3	4	2	23.26	968	0.035	8636.96	1	21
16423	2	9.98	6.71	1.076	53	2	58	4	2	2	42.32	1511	0.011	6743.97	2	18
25707	1	6.25	4.88	0.423	53	2	66	4	1	2	23.88	916	0.021	2331.59	2	36
28253	1	27.52	21.48	0.517	53	2	85	3	2	2	25.75	967	0.042	9242.56	1	30
41526	2	14.48	6.94	0.698	53	2	64	3	3	2	25.84	1601	0.037	25541.4	2	67
16497	2	7.3	7.96	0.636	53.1	1	74	3	1	2	35.82	1301	0.018	5549.34	2	23
28031	2	3.42	2.59	0.319	53.1	1	61	4	4	1	33.94	549	146	2427.1	1	30
30044	2	7.2	5.96	0.836	53.1	1	85	3	3	2	27.88	1825	0.011	2001.55	1	37
36875	1	14.91	5.19	0.909	53.1	2	74	4	4	1	37.19	2529	0.011	3173.58	2	52
43682	2	12.33	7.51	0.688	53.1	2	80	3	3	2	29.83	1295	0.029	5661.68	2	63
45640	1	6.09	5.42	0.73	53.1	2	73	4	3	2	30.83	1077	0.034	3344.5	2	64
46954	2	6.35	3.41	0.796	53.1	2	54	4	4	2	37.11	1324	0.011	5388.74	2	65
49900	2	9.42	4.55	0.884	53.1	1	80	3	5	2	24.43	1350	27.9	5830.56	1	68
14598	1	17.88	4.99	1.671	53.2	2	85	3	1	2	29.52	1976	0.027	6697.79	2	17
30455	2	9	11.03	1.103	53.2	2	63	3	5	2	25.81	1462	0.011	23719.1	2	30
46138	2	4.6	5.9	0.65	53.2	2	60	3	2	1	31.01	852	0.038	3873.52	1	62
47366	2	9.74	5.81	0.527	53.2	2	52	4	4	2	32.53	1965	0.027	3603.63	2	71
49659	2	8.94	4.64	0.681	53.2	2	74	3	1	1	27.22	1058	389	11003	2	59
10377	2	4.96	3.95	0.529	53.3	2	66	3	5	1	28.66	404	0.026	20331.2	1	21
12916	1	9.99	10.57	1.377	53.3	2	57	3	4	2	40.36	1910		13124.1	2	23
13849	2	16.98	12.68	1.111	53.3	1	78	4	2	2		1284	0.064	10858.7	2	18
27279	1	9.03	8.18	1.015	53.3	2	74	3	2	1	27.44	1309		10994	1	39
37460	1	12.24	5.81	0.993	53.3	2	79	1	3	2	25.32	2081	193	1953.82	2	57
47872	2	8.94	7.51	0.99	53.3	2	72	4	4	2	32.06	1278	0.419	3019.26	1	68
14474	1	4.57	5.25	0.912	53.4	1	85	3	4	2	24.8	1169	0.092	2644.36	1	19
23473	2	5.47	3.56	0.363	53.4	1	71	3	3	1	27.38	848	0.171	7636.04	2	36
27188	2	11.41	4.59	0.708	53.4	2	68	4	4	1	36.52	1154	0.025	3348.03	1	39
36227	2	10.78	7.46	0.915	53.4	1	62	4	3	2	29.89	1300	0.04	2387.95	1	55
40765	2	2.83	2.31	0.338	53.4	2	59	3	5	2	18.89	726	0.023	32416	1	48
50187	2	15.81	7.67	1.706	53.4	2	60	2	1	2	31.53	2226	0.042	1923.9	2	61
16427	2	7.74	5.38	0.565	53.5	2	66	4	2	1	29.32	1097		3637.97	1	14
17695	2	6.01	5.11	0.636	53.5	1	64	1	3	2	33.69	1435	0.022	2164.22	2	23
28562	2	13.49	7.02	0.495	53.5	1	64	3	1	2		816	0.3	5759.55	2	34
28742	2	6.05	5.03	0.611	53.5	2	61	1	5	2	28.98	842	0.018	1066.61	2	36
30959	2	8.35	3.66	1.096	53.5	1	55	1	1	2	36.75	1302	0.376	2512.19	2	42
37330	2	12.8	8.24	1.58	53.5	2	68	3	4	2	20.17	1343	0.259	31111.1	1	50
42079	1	6.06	5.29	0.645	53.5	1	80	3	5	2	20.71	1441	0.051	4657.75	1	65
15723	1	5.78	3.83	0.321	53.6	2	64	4	2	1	34.41	775	455	2774.23	1	21
18894	2	10.58	7.1	0.644	53.6	2	61	3	5	2	31.84	1187	0.011	15164.6	2	21
22009	1	12.95	4.7	1.18	53.6	2	77	3	4	2	32.15	1310	0.052	7177.09	1	30
22096	1	13.08	4.67	1.301	53.6	1	65	5	3	1	37.17	2270	0.011	7373.83	2	34
22406	2	6.7	4.19	0.654	53.7	1	69	4	3	2	27.77	822	74.7	3314.43	2	41
24876	2	6.92	4.53	0.59	53.7	1	58	1	2	2	34.38	1286	0.011	11582.6	1	34
44522	1	15.7	9.06	0.966	53.7	2	72	4	3	1	34.85	1284	0.011	5628.98	2	70
44731	2	8.7	5.92	0.926	53.7	2	60	2	4	2	29.95	1087	0.011	2452.93	2	73
49419	1	11.45	4.92	0.972	53.7	2	70	1	1	2	37.35	1117	0.598	1714.99	1	66
50690	2	7.53	6.35	0.961	53.7	1	56	2	3	2	23.26	1164	17.1	2305.28	1	72
10517	2	10.31	11.24	1.526	53.8	2	63	4	3	2	36.74	1912	0.099	5095.8	1	20
19142	2	9.49	4.46	0.842	53.8	2	72	3	4	2	21.23	1140	0.017	5676.22	1	22
28709	2	7.02	9.64	1.151	53.8	2	59	1	1	1	42.44	1264	0.134	4341.27	1	34
35535	2	15.59	11.1	1.979	53.8	2	85	3	5	2	21.82	1679	0.011	9597.37	1	57
47026	1	9.33	6.41	0.643	53.8	2	80	3	5	2	32.33	1246	0.011	9668.35	1	60
48272	1	12.04	8.78	0.625	53.8	2	70	3	3	2	18.53	1859	203	5238	2	59
51572	2	7.03	5.5	0.918	53.8	2	77	3	3	1	32.46	1335	0.011	6764.59	2	61
25561	2	6.52	2.48	0.577	53.9	1	68	1	2	1	25.59	777	0.022	1068.94	2	40
28829	1	5.59	3.1	0.352	53.9	2	83	3	2	1	26.14	962	0.099	4962.65	2	34
29742	1	6.54	5.77	0.43	53.9	2	80	3	3	2	23.8	686	0.018	5897.71	1	31
30148	2	5.15	4.3	0.507	53.9	2	57	2	1	2	23.97	1091	1.43	17701.1	2	43
40358	2	17.09	3.6	1.173	53.9	2	63	3	4	2	30.17	1210	0.027	9723.3	2	44
46170	2	15.97	13.38	0.524	53.9	2	59	3	3	2	33.35	1109	0.118	3884.81	1	64
47388	2	8.72	9.82	0.701	53.9	2	63	1	1	1	27.57	1376	344	865.921	1	74
12742	1	14.06	4.37	0.728	54	2	85	3	3	2		1483	74.1	2822.44	1	23
26484	2	6.91	5.46	0.975	54	2	60	4	5	2	25.91	1333		1446.74	2	29
27462	2	4.86	3.2	0.494	54	2	85	3	1	2	30.38	993	0.055	7864.38	1	32
28403	2	22.54	11.7	1.458	54	2	57	3	5	2	26.03	2088	0.011	16121.8	1	40
29577	2	19.05	18.78	1.482	54	2	68	1	2	2	34.49	1185	0.02	862.306	1	34
33320	1	9.75	5.67	0.696	54	2	85	4	2	1	23.64	1221	447	3181.64	2	58
45309	2	13.3	8.01	0.826	54	2	62	1	2	1	29.57	1207	0.036	3001.82	1	60
46586	1	10.42	10.03	1.397	54	2	63	5	3	2	24.31	2199		17094.2	2	70
46786	2	5.3	3.83	0.557	54	1	76	1	2	1	31.03	886		1295.91	1	60
50466	2	5.05	2.28	0.424	54	1	64	4	4	1	37.64	1152	0.021	1582.93	1	68
16005	1	15.67	14.14	0.404	54.1	2	82	3	3	2	24.69	848	0.011	3811.11	2	19
19292	2	7.2	4.33	0.522	54.1	2	61	3	2	1	33.26	874	0.179	6429.42	2	20
21782	2	5.83	4.1	0.456	54.1	2	68	1	1	2	22.49	1170	0.011	952.762	1	39
34514	2	5.16	5.96	0.689	54.1	1	63	3	5	2	28.19	1531	258	6712.37	1	46
35963	2	8.68	6.49	0.645	54.1	2	74	1	1	2	25.09	788	0.011	2694.25	2	54
37928	1	7.37	3.53	0.614	54.1	2	76	4	1	2	29.84	1015	0.059	6186.79	2	46
45496	2	8.92	8.94	0.861	54.1	2	67	3	4	2	26.2	1364	0.046	18054	2	63
50294	2	10.33	9.35	0.607	54.1	2	58	3	3	2	18.5	1716	460	38873.7	1	63
14307	2	4.61	2.69	0.327	54.2	1	59	3	5	2	28.65	483	0.011	11506.2	1	22
21484	2	10.72	20.06	1.064	54.2	1	55	4	4	2	29.45	1992	0.011	6613.84	2	37
27429	2	11.22	2.9	0.438	54.2	2	72	4	5	2	42.58	875	388	6668.62	1	36
29717	2	6.03	4.86	0.591	54.2	2	74	3	2	1	36.3	894	0.011	19648.2	1	39
31154	2	11.21	8.3	1.445	54.2	1	62	4	3	2	26.98	1929	338	1204.87	1	45
33971	2	8.51	11.05	1.333	54.2	2	64	3	3	2	34.77	1393	190	14385	2	46
46867	2	3.94	4.66	0.465	54.2	1	72	4	3	2	30.21	1213	0.192	3235.53	2	66
17890	2	6.35	4.21	0.866	54.3	2	68	3	4	2	32.05	863	0.032	13189	2	20
18223	2	6.99	7.88	1.136	54.3	2	77	3	4	2	29.43	1057	0.011	8115.39	2	20
29803	2	17.48	9.66	0.519	54.3	1	75	3	2	2	26.38	898	32.4	2762.4	2	29
34060	2	8.52	7.02	1.421	54.3	2	70	1	4	2	36.23	2334	0.076	2472.54	1	54
36057	2	8.81	5.4	0.855	54.3	1	58	1	3	2	31.6	1293	190	11687.3	1	55
44082	1	16.32	5.15	0.684	54.3	1	80	3	5	2	31.69	1893	0.037	2808.02	1	60
14646	2	7.27	5.95	0.532	54.4	2	85	3	3	1	22.16	984	0.262	3874.62	2	23
17135	2	5.01	6.88	0.542	54.4	1	61	4	1	2	26.86	1159	398	964.537	1	27
18224	2	7.12	7.48	0.605	54.4	1	72	1	1	1	25.65	934	0.011	900.35	2	28
22109	2	17.27	9.24	1.772	54.4	2	70	3	3	2	24.25	2375	0.102	13488.2	2	34
28603	2	7.91	6.22	0.862	54.4	1	61	3	3	2	29.43	1688	0.896	8727.01	2	32
34673	2	9.16	5.14	0.888	54.4	2	58	4	2	1	31.56	1311	325	6153.52	1	52
37388	2	13.08	8.92	1.855	54.4	1	73	3	5	1	26.5	2344	0.074	6330.87	2	50
46098	2	12.29	14.24	1.083	54.4	1	65	3	2	1	25.56	1089	846	4179.6	2	59
46512	2	5.7	5.86	0.557	54.4	2	62	4	4	2	21.63	1072		5108.06	2	67
20994	2	7.61	4.32	0.745	54.5	2	67	4	4	2	30.3	1662	250	3606.02	2	26
29227	2	8.5	6.27	0.453	54.5	1	71	4	1	2	20.99	1541	0.054	4090.87	2	35
40422	2	10.92	6.55	0.342	54.5	2	61	1	3	1	30.18	867	0.015	4246.56	1	55
44200	1	9.06	6.56	1.725	54.5	1	80	3	5	2	25.56	1468	0.011	4266.26	2	71
50102	2	4.68	5.86	0.678	54.5	1	72	4	2	1	29.92	1275	0.374	2787.89	2	70
12807	2	8.85	5.63	0.653	54.6	1	78	4	1	2	29.93	1150	0.802	2200.32	1	25
19406	2	9.12	6.02	0.625	54.6	1	57	4	4	2	26.05	1558	274	10054.5	1	16
27960	2	8.67	6.08	1.569	54.6	2	72	3	5	2	22.5	1305	0.011	20721.5	1	31
29256	2	6.39	7.27	0.557	54.6	2	55	3	4	2	27.36	1092	265	39160.2	1	33
41105	2	10.98	11.11	1.251	54.6	2	66	4	5	2	40.19	1525	0.011	6847.02	2	54
46123	2	4.28	8.08	0.661	54.6	1	69	3	1	1	41.57	1003	0.03	3211.62	1	62
19426	2	8.3	6.9	0.611	54.7	2	63	3	3	2	31.05	1129	38.6	9724.34	2	17
22679	2	7.67	8.41	0.611	54.7	1	69	3	2	2	21.26	1420	0.019	12991.6	1	29
23980	2	8.2	7.78	0.898	54.7	2	81	3	4	2	36.76	1117	0.273	6144.76	1	42
24515	2	9.09	4.39	1.166	54.7	2	69	3	4	2	31.89	1537	0.011	3698.49	1	33
30957	2	9.63	12.22	0.564	54.7	1	72	1	1	2	27.47	1480	0.042	1055.61	1	34
32938	2	11.92	6.23	1.028	54.7	2	79	3	3	2	26.52	1687	2.19	14686.8	1	49
35485	1	16.68	6.91	1.088	54.7	2	85	3	1	2	26.17	1980	0.057	9688.5	2	46
50031	2	7.57	10.26	0.617	54.7	2	78	2	1	2	33.08	1030	0.024	5128.53	1	72
15340	2	7.64	3.91	0.759	54.8	2	59	3	2	2	20.26	1681	239	11984.8	1	14
17315	1	11.94	10.3	1.585	54.8	2	74	3	5	2	34.05	1837	0.011	14759.8	1	15
26718	2	6.02	5.08	0.365	54.8	1	76	1	1	2	25.51	850		1055.61	1	34
43025	1	7.09	4.74	0.874	54.8	2	80	3	4	2	25.11	1330	0.155	7904.24	1	63
50792	1	4.78	4.89	0.64	54.8	2	80	4	1	2	29.38	1095	0.011	4038.11	1	62
21407	2	10.07	6.78	0.81	54.9	2	78	4	4	1	32.73	1324	0.041	6510.81	2	29
25955	2	13.91	5.66	0.771	54.9	2	58	4	2	2	29.67	1316	0.554	5669.35	2	42
31323	2	7.79	5.03	0.79	54.9	1	83	3	1	2	25.6	1226	0.378	10235.5	1	54
37665	2	16.71	12.25	0.764	54.9	2	76	3	5	2	22.98	1367	0.053	8129.55	2	49
44391	2	12.42	5.27	0.46	54.9	2	60	4	3	2	51.17	868		1965.88	1	68
46149	2	6.59	4.44	0.691	54.9	1	80	3	3	2	25.53	925	0.015	7907.97	2	60
46593	2	7.16	5.43	0.867	54.9	2	52	4	3	2	28.58	1240		13709.5	2	67
14546	2	5.05	3.7	0.563	55	2	74	3	4	2	26.5	960	0.011	6210.75	1	19
20889	2	7.75	8.22	0.695	55	1	61	3	1	1	32.67	1003	0.838	11411.1	2	20
26616	2	15.88	5.9	1.098	55	1	62	3	3	2	24.66	1635	396	21437.8	1	32
29714	2	12.31	5.19	0.643	55	2	72	4	1	1	34.12	938	367	2250.29	2	41
49619	1	9.94	5.88	0.404	55	2	73	3	4	2	33.24	926	0.547	6947.19	2	61
15712	2	11.33	10.25	1.088	55.1	1	77	3	3	2	29.56	1748	0.011	9801.49	1	22
18114	2	31.34	3.75	0.572	55.1	2	72	3	3	2	19	1042	0.448	7003.57	1	18
24277	2	25.29	10.68	2.226	55.1	1	62	3	2	2	28	3092	39.7	5858.91	2	34
39389	2	12.36	5.29	0.867	55.1	1	78	3	4	2	24.7	1273	0.02	11242.6	2	51
42664	2	5.65	5.73	0.633	55.1	1	53	4	4	2	22.24	1574	236	3027.48	1	68
47272	2	8.86	5.45	1.061	55.1	1	78	3	5	2	26.77	1442	0.015	11218	2	64
47304	2	6.36	7.3	0.793	55.1	2	56	3	4	1	32.8	1528	223	3949.74	2	60
12322	2	6.29	7.69	0.385	55.2	2	57	4	4	2	41.94	1725	0.025	2742.48	1	18
15327	2	12.31	5.52	0.607	55.2	2	76	3	3	2	36.83	1077	0.027	14600.7	2	19
22917	2	18.07	10.49	0.764	55.2	1	84	3	4	1	26.3	1379	0.011	4318.44	1	35
26842	2	7.69	7.71	0.438	55.2	2	61	4	2	1	44.82	1202	1.07	2331.59	2	36
38119	2	12.03	10.98	1.785	55.2	2	81	4	2	2	23.64	1997	0.025	3739.45	1	49
43798	2	14.71	7.73	1.001	55.2	1	56	4	2	2	16.84	1310		7553.64	1	64
46951	2	12.8	4.09	1.856	55.2	1	78	3	1	2	15.25	1641	252	10291.9	2	60
51616	2	10.32	5.4	0.74	55.2	1	60	3	3	1	42.4	1777	49.4	24106.2	2	62
12828	2	10.53	5.48	0.91	55.3	1	70	3	1	2	27.99	1456	293	4862.27	2	20
13746	2	25.48	13.04	1.157	55.3	1	80	3	4	2	25.61	1731	0.038	2684.68	1	17
22781	1	16.37	14.44	1.764	55.3	1	73	3	1	2	18.25	1561	162	13143.7	1	41
31367	1	5.35	3.65	0.617	55.3	2	85	3	3	2	18.99	607	0.011	10768.9	2	53
33552	2	7.31	3.23	0.828	55.3	2	67	5	1	2	21.8	776	0.039	13160.2	1	54
36379	2	16.54	9.59	1.141	55.3	2	58	1	3	2	24.38	1165	0.016	5266.93	1	54
45146	1	9.84	8.59	1.17	55.3	1	80	3	1	2	27.24	1446	0.046	4576.91	2	63
47070	1	14.69	10.51	1.155	55.3	2	80	4	4	1	33.05	1351	0.14	3675.13	2	66
51006	1	9.8	6.36	1.854	55.3	2	61	1	2	2	29.18	1467	0.011	2190.84	2	73
18064	1	11.12	3.88	1.088	55.4	2	81	3	2	1	37.15	1235	0.024	4310.7	1	20
28696	2	5.85	7.84	0.583	55.4	1	57	3	3	2	27.57	1949	652	55631.6	2	32
37751	2	11.18	6.42	1.167	55.4	1	55	3	4	2	23.07	1975	21.4	41575.4	1	50
46822	2	11.59	5.64	0.682	55.4	2	80	3	3	1	28.3	885	0.04	8025.29	1	61
49077	2	9.12	7.92	0.749	55.4	1	79	4	1	2	27.07	1389	0.131	4654.01	1	59
13735	1	8.55	3.83	0.925	55.5	1	85	1	5	2	27.66	2144	0.011	1271.16	1	17
17631	1	12.21	10.37	0.829	55.5	2	85	3	2	2	33.99	1616	0.011	7693.85	1	19
17843	2	8.46	7.42	0.635	55.5	2	67	5	3	2	26.34	1040	329	23577.4	2	24
39490	2	6.51	2.15	0.651	55.5	1	69	3	1	1	25.97	826	0.042	6876.01	2	49
41825	2	10.27	4.77	0.902	55.5	2	63	4	5	2	24.65	1010	531	1777.64	1	63
42908	1	8.93	9.58	0.99	55.5	2	80	3	4	2	27.38	1593	0.032	7600.46	2	60
37432	1	7.26	5.13	0.976	55.6	2	71	3	3	2	28.8	1633	0.011	9803.96	1	54
45401	2	6.01	4.8	0.802	55.6	2	56	3	3	2	22.43	1161	173	4127.5	1	67
47623	2	13.63	6.56	2.433	55.6	1	55	4	4	2	25.75	2109	0.035	2102.99	1	70
13912	2	10.4	7.45	0.893	55.7	2	52	4	5	2	55.4	2446	247	8628.99	2	14
14276	2	8.32	5.86	0.799	55.7	1	67	3	5	2	21.56	1845	0.011	21508.4	2	19
27423	2	7.14	6.38	0.852	55.7	2	82	3	1	2	22.13	1480	0.025	10143.9	2	34
31348	2	14.97	5.28	0.592	55.7	1	62	4	2	2	31.16	1136	169	1582.1	1	49
32591	2	13.45	10.52	1.321	55.7	2	52	4	2	2	41.25	1540	0.026	6808.31	1	51
34281	2	14.64	12.08	1.376	55.7	1	83	4	3	2	21.56	1509	0.1	2099.95	1	49
36112	2	5.88	3.59	0.722	55.7	2	74	3	3	1	31.62	777	129	19873	1	44
46078	1	6.38	8.04	0.689	55.7	2	80	3	5	2		1034	0.088	8105.82	1	60
20425	1	9.06	5.06	0.778	55.8	2	67	3	4	1	33.92	904	0.096	5137.47	1	16
42590	2	6.17	6.51	1.397	55.8	1	59	3	4	1	42.61	1194	273	13338.1	1	71
45535	2	6.34	5.2	0.848	55.8	2	76	3	1	2	32.53	1340	2.13	7677.77	2	59
48401	2	17.51	8.46	2.104	55.8	2	60	3	4	2	28.07	1492	0.011	17173	2	61
12467	2	21.31	8.75	1.273	55.9	1	84	3	3	2	25.89	1557	0.011	4172.78	1	23
14868	2	12.43	8.51	1.415	55.9	2	80	2	4	2	25.48	1511	0.119	3783.09	2	27
18401	2	9.06	6.38	0.731	55.9	2	63	3	3	2	23.92	1442	0.015	18808	2	23
29978	2	18.76	17.27	0.533	55.9	2	84	3	1	2	23.28	964	0.02	9283.8	2	32
36407	2	11.83	4.54	0.479	55.9	1	80	3	2	2	20.19	1374	0.011	4620.37	1	52
36838	2	9.98	9.9	1.32	55.9	1	69	3	3	2	25.44	1119	0.06	6255.01	1	49
36913	1	7.19	6.36	0.577	55.9	2	63	4	2	2	36.48	952		4420.67	1	52
42265	2	9.72	7.34	1.013	55.9	1	60	2	3	2	31.22	1645	0.078	1680.8	2	70
43767	2	12.18	12.03	0.921	55.9	2	67	3	4	2	21.02	1248	0.251	5628.62	1	59
43867	1	10.99	18.24	0.799	55.9	1	63	3	3	2	27.14	2032	10	3889.95	1	61
44601	2	20.56	9.66	0.72	55.9	2	60	4	2	2	36.61	1315	301	1662.56	1	62
45959	2	6.85	5.37	1.021	55.9	2	60	4	3	1	33.4	1405	599	3751.89	2	74
47793	2	9.42	7.29	0.953	55.9	1	56	1	4	1	33.03	1302	0.071	1406.97	2	70
36283	1	12.57	8.32	1.109	56	2	85	4	2	2		1640	0.055	2688.97	1	48
38156	2	8.22	6.69	1.269	56	2	55	3	5	2	34.79	1855	0.011	26960	2	44
46281	1	6.26	8.28	0.664	56	1	70	4	5	2	34.01	1277	0.066	5554.92	2	67
36986	2	14.52	8.14	0.745	56.1	2	50	4	2	2	38.56	1348	303	10766.8	1	49
49552	1	22.21	13.56	1.433	56.1	2	71	3	4	2	28.6	1465	54.7	11964	2	67
17633	2	12.4	6.31	1.193	56.2	2	68	1	4	1	24.58	1989	0.18	598.788	2	23
22219	2	7.57	8.96	0.806	56.2	1	61	3	2	2	30	1605	361	10311.2	2	36
36119	2	6.2	9.96	1.108	56.2	1	83	2	3	1	29.24	1115	0.011	1986.35	2	45
37389	2	3.74	5.05	0.293	56.2	1	71	3	2	2	23	739	338	6713.5	1	53
42632	2	7.66	7.56	0.764	56.2	2	65	3	4	2	27.38	1257	0.015	18003.5	1	60
13526	2	10.37	4.66	0.967	56.3	2	81	3	2	2	24.63	1367	0.179	3033.47	2	14
20347	2	14.43	11.73	1.832	56.3	1	59	3	4	2	26.66	1576	0.011	11650.8	1	19
30779	2	14.63	5.14	1.306	56.3	2	71	3	3	2	27.12	1356	0.042	9953.51	2	30
42037	2	25.64	14.78	1.123	56.3	1	75	3	5	1		1655	0.011	10658.7	1	61
43268	2	9.21	6.72	0.873	56.3	2	70	1	2	2	25.19	2087	184	4596.42	2	65
45756	2	13.97	4.44	0.942	56.3	2	66	3	5	2	18.11	1146	0.011	14145.8	2	70
45857	2	18.62	9.99	1.169	56.3	2	80	4	3	2	24.4	1452	0.604	2077.01	2	74
9980	2	11.74	8.12	0.665	56.4	2	85	3	2	2	38.64	1321	0.026	32143.9	1	23
17833	2	4.93	5.03	0.376	56.4	2	68	1	1	1	36.06	649	0.015	601.325	2	15
28327	1	16.41	11.66	1.422	56.4	1	85	3	4	2	19.68	1791	0.011	8720.3	1	29
33454	1	19.23	18.55	1.342	56.4	1	84	4	2	1	25.19	1535	1.63	3212.79	1	55
39016	2	4.05	4.48	0.552	56.4	1	55	4	3	2	24.1	1041	0.046	3290.82	2	56
45286	2	10.15	6.95	0.784	56.4	2	58	3	5	2	22.35	1613	0.022	13988	1	67
47601	1	10.52	9.76	0.744	56.4	2	80	3	5	2	27.44	1655	0.011	10547.5	2	66
48805	2	5.9	7.89	0.634	56.4	2	66	3	3	2	33.68	958	0.011	23829.9	1	60
49201	2	10	5.9	1.089	56.4	1	62	3	3	2	28.15	2152	0.425	16353.4	1	63
49882	1	8.53	9	0.771	56.4	2	80	3	3	1	30.97	1357	0.022	7162.71	2	59
10140	2	7.49	8.18	1.029	56.5	1	85	3	2	2	26.92	1130	361	4035.47	1	19
18036	2	19.13	10.78	0.968	56.5	1	57	4	5	2	21.44	1369	218	8074.79	1	19
19254	2	9.61	8.45	0.823	56.5	2	84	3	2	2	21.08	1122		8228.39	2	16
32268	2	26.87	10.79	0.974	56.5	1	65	3	3	2	37.1	1791	212	5295.81	2	46
33069	2	28.71	13.4	1.523	56.5	1	80	3	1	2	22.58	1690	0.016	4971.29	2	46
36205	2	16.7	7.79	1.222	56.5	2	85	1	1	1	42.8	1474	0.011	3122.55	2	58
36974	2	21.27	8.31	1.148	56.5	1	65	1	1	2	23.84	1532	0.034	391.409	1	55
37350	1	8.04	6.31	0.854	56.5	2	60	3	4	2	23.15	1057	244	8929.15	1	49
44104	2	6.23	3.31	0.896	56.5	2	80	3	4	2	32.07	1091	0.06	6037.13	1	63
45547	2	6.62	4.97	0.435	56.5	1	80	1	1	2	21.51	966	0.042	1531	1	73
47025	2	12.62	5.77	2.038	56.5	2	57	3	4	2	21.26	1623	0.011	4550.39	1	65
51515	2	14.43	13.92	0.811	56.5	2	55	3	3	2	20.29	1787	168	12559.8	1	59
10205	2	5.06	4.18	0.268	56.6	1	67	3	3	2	23.99	1010	209	13045.2	1	27
14319	1	8.87	5.34	0.877	56.6	2	81	3	2	1		1132		8552.72	1	14
26215	2	11.36	10.97	0.827	56.6	2	73	1	1	2	28.18	996	0.011	1494.45	2	38
40410	2	11.29	10.26	0.987	56.6	1	77	3	4	2	33.18	1402	122	6297.04	2	49
45018	2	8.82	5.27	0.776	56.6	1	71	4	2	2	25.86	1101	0.032	2285.4	1	62
49285	2	24.04	12.58	0.706	56.6	2	64	3	2	2	27.96	1528	0.011	20234.4	2	67
42769	1	15.74	13.85	0.914	56.7	2	73	3	4	2	26.7	1114	0.063	14023.7	2	62
50509	2	7.53	4.81	0.645	56.7	2	62	4	4	2	37.42	1276	0.048	1832.51	2	69
14455	1	12.65	15.52	0.709	56.8	2	80	3	3	1	31.31	1146	0.033	10129.9	2	16
34960	2	7.89	6.35	0.686	56.8	2	76	3	3	2	34.24	902	0.022	17283.2	2	46
42426	1	8.16	7.9	0.787	56.8	2	73	3	4	2	22.19	1607	0.015	10289.2	2	71
43748	1	13.74	7.07	1.076	56.8	2	80	3	2	2	30.43	1013	0.011	7998.13	2	59
44898	2	8.03	4.33	0.886	56.8	2	53	4	2	1	40.68	949		3505.07	1	72
46171	1	6.61	4.49	0.592	56.8	1	78	3	3	2	30.79	1083	0.011	7687.68	2	60
14595	2	6.2	5.97	0.897	56.9	2	67	3	4	2	25.76	1001	2.62	7675.55	1	26
16498	2	11.95	15.41	0.91	56.9	2	61	3	5	2	20.28	2096	194	6862.64	1	17
32941	2	7.05	7.84	0.496	56.9	2	56	1	4	2	36.31	729	9	2111.96	2	54
36442	2	17.11	12.81	2.519	56.9	1	65	4	1	2		2332	0.157	3618.02	2	52
42712	2	17.24	13.12	0.648	56.9	2	63	4	4	2	26.98	1029	0.011	2475.17	1	59
46812	2	9.5	7.06	1.3	56.9	2	58	3	5	2	33.33	1198	0.011	40352.6	1	65
49598	2	6.68	3.65	0.457	56.9	2	73	4	1	1	34.52	812	0.818	2901.95	1	59
50560	2	17.83	8.32	0.714	56.9	2	80	3	4	2	25.08	1491	0.03	10325.1	1	61
15073	2	8.67	6.78	1.069	57	2	70	4	3	2	35.01	1884	0.011	3764.07	1	16
15678	1	6.02	6.03	0.98	57	1	80	3	5	2	25.82	1325	274	2986.21	1	21
16319	1	7.61	6.31	0.609	57	1	80	3	4	2	25.13	1161	0.054	2675.12	1	19
20111	2	8.58	6.15	1.08	57	2	75	3	4	1	30.5	1431	0.397	12243.7	1	23
36333	1	11.63	6.23	0.841	57	2	79	3	3	2	22.58	1159	0.039	19831.6	2	44
40088	2	4.76	6.02	0.624	57	2	69	1	1	2	36.03	870	0.011	8283.7	2	55
42867	2	13.42	2.82	0.672	57	1	68	4	4	2	25.27	1151	266	1373.64	1	73
46243	2	13.14	10.76	1.142	57	1	62	3	4	2	21.72	1892	0.04	14547.9	1	67
15061	2	14.38	13.2	1.276	57.1	1	81	3	5	2	26.27	2038	0.011	2781.45	1	19
23608	2	22.36	12.19	4.129	57.1	2	66	3	5	2	20.89	1933	0.011	17312.1	1	43
28340	1	27.64	32.26	1.352	57.1	1	82	3	2	2	26.85	2109	81.1	2044.79	2	40
29615	2	6.83	13.76	0.399	57.1	1	55	3	4	2	30.61	966	109	46800.8	1	38
30467	1	19.24	11.46	1.675	57.1	1	74	1	1	2	24.09	1752	0.09	822.798	2	40
33247	2	7.09	4.96	1.226	57.1	2	55	3	5	2	27.34	1439	0.021	11143.3	2	56
42940	2	13.47	8.63	0.872	57.1	2	71	3	2	2	25.02	979	76.6	4964.64	1	61
45594	2	8.26	6.2	0.895	57.1	2	78	3	5	2	24.29	1329	0.016	7930.54	1	60
48047	2	9.49	7.32	0.957	57.1	2	56	5	4	2	32.77	2183	0.011	18667.6	1	69
15931	2	8.97	5.22	0.799	57.2	2	76	3	4	2	23.36	1330	0.011	15916	2	16
20196	1	11.97	7.06	1.389	57.2	2	61	3	2	2	31.16	2321	0.05	14541.6	2	23
27233	2	9.55	4.02	0.44	57.2	2	64	3	2	2	41.22	648	0.309	17299.9	2	34
34711	2	18.06	6.16	1.342	57.2	2	76	1	1	2	29.69	1682	0.011	2999	2	58
36788	1	9.86	4.76	0.683	57.2	1	85	5	5	2	28.58	932	0.055	3423.65	1	58
43366	2	13.92	7.86	0.62	57.2	2	61	1	1	2	32.79	975	0.044	2108.71	1	66
48429	2	9.46	4.85	0.911	57.2	2	73	4	2	1	32.34	1442		3751.97	2	67
48554	2	8.85	6.3	0.807	57.2	2	58	1	1	2	26.62	844	0.011	2367.29	2	65
51325	2	17.75	13.1	1.12	57.2	1	80	3	2	2	22.15	2331	0.086	4744.35	2	59
39193	2	22.1	8.48	1.089	57.3	2	83	4	2	2	29.26	1234	1.38	3992.87	2	48
49674	2	12.16	5.97	1.058	57.3	1	53	4	4	2	42.16	1867	0.025	5464.84	2	72
51606	2	8.25	4.6	0.756	57.3	2	76	3	4	2	18.79	1176	163	5981.08	1	60
17644	1	6.98	4.18	0.478	57.4	2	79	3	1	2	18.09	869	241	7318.73	2	20
24245	2	11.38	9.49	0.493	57.4	2	55	4	4	2	30.26	1865	0.011	6837.61	1	36
28280	1	11.99	8.52	1.046	57.4	2	76	3	2	2	23.77	1445	0.941	9501.02	1	29
31033	2	12.4	5.81	0.993	57.4	1	71	4	1	2	24.2	1502	243	1741.3	1	30
45003	2	6.25	12.65	1.49	57.4	1	80	3	3	2		1484	0.037	3634.51	2	63
21252	2	13.35	14.86	1.411	57.5	2	62	3	4	2	30.45	1317	206	5194.48	1	41
21468	2	6.25	2.96	0.506	57.5	1	85	3	4	2	29.14	732	0.011	4735.46	2	35
22884	2	43.32	20.69	0.992	57.5	2	55	3	5	2	34.14	1251	2.66	16835.5	1	29
24944	2	9.25	8.29	0.681	57.5	1	84	3	5	2	26.02	1627	0.51	4372.99	1	33
49323	1	5.24	5.73	0.755	57.5	2	73	4	2	1	38.85	1384	0.067	5571.55	2	68
50559	2	6.77	5.2	0.856	57.5	2	75	3	3	2	22.09	1167	97.1	11579.9	1	66
10907	2	15.98	8.19	0.844	57.6	1	77	3	4	2	28.7	1270	0.025	12215.4	2	24
17019	2	6.09	3.47	0.384	57.6	2	56	3	4	2	35.06	924	0.041	13331.5	2	24
17038	2	6.71	4.56	0.597	57.6	2	63	4	3	1	24.54	1171	0.035	4943.36	1	27
20041	1	10.62	6.17	1.07	57.6	2	71	3	4	2	28.71	1112	1.98	8849.07	1	17
20996	1	8.16	5.43	0.574	57.6	1	77	3	2	1		1163	0.049	4312.59	2	14
22323	2	10.77	8.2	1.065	57.6	1	63	3	5	2	23.74	1930	0.06	11242.5	1	34
23001	2	8.36	9.9	1.51	57.6	1	72	3	2	2	29.85	1483	0.011	8425.77	1	38
23476	2	7.9	6.69	0.752	57.7	2	80	1	1	1	33.6	942	0.17	1439.08	1	34
24854	1	9.16	3.5	0.841	57.7	2	85	4	1	2	31.62	886	0.011	4846.97	1	35
25880	2	13.45	3.55	0.626	57.7	2	60	1	2	1	29.36	1053	0.011	1984.13	1	34
26433	2	9.8	9.33	0.828	57.7	2	82	3	4	2	26.26	1435	0.023	4046.96	1	38
30531	2	9.24	10.81	0.885	57.7	2	73	3	4	2	24.77	1949	0.022	10458.4	1	38
34850	2	14.17	5.77	1.414	57.7	1	71	3	3	2	25.19	1268	0.035	8798.57	2	54
39659	1	13.69	12.64	1.587	57.7	2	84	4	3	2	34.32	1522	243	5308.88	1	55
44725	1	13.33	7.35	1.062	57.7	1	80	3	4	2	24.98	1204	0.017	7427.24	1	63
12404	1	20.49	12.5	0.877	57.8	1	65	3	3	1	42.2	897	0.183	10639.5	2	20
14480	2	8.25	5.1	0.634	57.8	2	81	3	1	2	25.52	1187	0.011	4051.18	1	23
21501	2	10.04	10.33	1.243	57.8	2	65	3	3	2	26.13	1356	0.034	26994.1	2	32
24191	2	5.66	4.4	0.548	57.8	1	66	1	1	2	24.74	1364	474	1295.06	2	40
27739	2	10.53	9.84	1.906	57.8	1	68	3	5	2	29.35	2412	1.15	7726.69	1	29
31746	1	9.49	12.53	0.836	57.8	2	77	3	1	1	27.66	1248	0.051	17360.8	2	46
34036	2	8.4	6.56	0.557	57.8	2	85	3		2	23.28	1269		10880.8	2	47
36354	2	8.17	6.66	0.759	57.8	1	70	4	3	1	30.29	1910	0.011	4159.61	2	58
37442	2	8.46	5.1	1.045	57.8	2	55	4	5	2	44.86	962	0.011	8399.81	2	45
38703	2	7.3	6.11	1.38	57.8	2	76	1	3	2	27.44	1585	118	3683.11	1	55
46536	1	7.21	7.7	0.665	57.8	2	79	3	2	2	30.96	900	0.03	6955.49	1	61
47588	2	13.34	10.6	0.737	57.8	2	77	3	4	2	24.89	1364	0.105	6434.59	2	64
51348	1	16.19	12.57	1.458	57.8	1	80	3	5	2	28.15	2206	0.204	12247	1	66
13203	2	9.35	4.14	0.938	57.9	2	60	3	5	2	18.97	1460	319	15932.7	1	23
16583	2	6.54	6.01	0.764	57.9	1	78	3	3	2	21.62	1442	0.011	2042.31	2	23
24207	2	6.41	7.16	0.7	57.9	1	60	3	4	2	23.02	1458	0.465	15897.6	1	31
31668	1	9.29	8.97	0.987	57.9	2	85	3	4	2	21.13	1221	0.011	6445.24	2	49
34042	2	11.55	6.51	1.337	57.9	2	54	4	4	2	26.7	2411	0.016	6161.15	1	52
43702	1	2.22	1.42	0.288	57.9	2	80	4	1	1	22.35	431	213	6027.87	2	67
46712	1	18.66	6.49	1.046	57.9	2	80	3	4	2	25.73	1822	0.017	5153.67	2	69
14022	2	7.95	6.1	0.955	58	1	72	4	1	1	24.99	1178		3419.25	1	16
16217	2	6.6	6.74	1.088	58	2	61	4	4	2	27.55	827	0.011	5152.01	2	18
24879	1	6.46	3.09	1.083	58	1	76	4	4	1	38.17	1369	0.038	4629.15	1	41
46476	2	9.25	4.8	0.614	58	2	73	1	1	2	27.59	1117	0.011	4745.54	1	66
10874	2	9.84	5.27	1.109	58.1	2	81	3	1	2	30.9	1756	1.45	11313.6	2	22
14080	2	5.68	5.97	0.534	58.1	1	62	5	5	2	32.17	782	31.5	14698.4	2	17
16561	2	22.36	19.53	0.839	58.1	2	85	3	3	2	21.71	1031	0.011	4816.05	2	21
18928	2	8.37	7.33	0.663	58.1	1	71	3	2	2	20.58	1539	217	10547.8	1	18
23138	2	8.76	6.45	0.51	58.1	2	72	3	3	2	28.75	1305	2.87	9569.06	1	41
31192	2	7.17	6.13	0.478	58.1	2	60	3	4	2	35.6	568	0.037	9938.88	1	44
32017	2	7.72	15.18	0.695	58.1	2	59	1	1	2	25.07	1168	0.011	15350.4	2	54
44910	2	12.79	5.37	1.317	58.1	1	62	1	1	2	24.26	1560	0.039	2278.3	2	70
48325	2	10.02	7.22	1.388	58.1	1	78	2	5	2	24.94	1517	0.011	1350.47	1	70
49821	2	14.66	5.71	0.7	58.1	1	72	4	1	2	25.54	1967	138	2497.67	2	66
49996	2	6.6	4.75	0.651	58.1	2	61	1	1	2	35.22	1023	0.017	4314.46	1	66
12138	2	8.56	4.36	0.952	58.2	1	64	4	3	1	42.48	1228	0.043	1281.28	2	15
19921	2	9.4	5.94	0.637	58.2	2	57	3	4	2	19.95	1836	0.037	19005.8	1	22
23521	2	23.22	26.96	1.569	58.2	2	59	4	5	1		1647	138	3231.56	1	41
37803	1	13.3	11.8	0.858	58.2	2	68	4	4	2	20.74	1928	0.053	6635.83	1	45
41668	2	7.94	8.51	1.015	58.2	1	66	4	5	2	28.28	1547	0.026	2329.06	2	62
51077	1	16.69	4.39	1.105	58.2	1	67	3	4	2	33.73	1420	0.021	14964.9	1	71
16790	2	7.26	2.88	0.813	58.3	2	70	4	4	2	35.18	1123	0.035	1691.4	1	24
35877	1	7.31	7.4	0.964	58.3	2	85	1	1	1	19.07	1243		3313.32	1	57
36691	2	9.67	11.2	2.332	58.3	1	82	3	5	2	26.28	2795	0.022	5181.96	2	56
38433	2	8.25	4.78	0.812	58.3	2	72	4	3	1	30.75	1172	0.023	4526.64	1	51
49871	2	7.08	5.88	0.779	58.3	2	63	3	2	2	32.25	1346	2.6	17785.1	1	59
17301	1	12.34	6.63	0.973	58.4	1	61	4	1	1	25.27	1936	245	2042.05	2	28
21874	2	6.04	7.44	0.218	58.4	1	66	4	1	1	37.45	786	1.43	4414.78	2	42
32350	2	12.14	8.51	3.706	58.4	1	76	4	2	2	27.46	2000	0.044	2099.95	1	49
43185	1	10.73	7.77	0.864	58.4	1	77	3	5	2	20.59	1711	0.011	5115.68	2	69
10719	2	14.37	13.8	1.358	58.5	1	58	3	4	2	27.77	3018	22.3	8990.78	1	26
20013	2	6.2	5.67	0.529	58.5	2	61	3	3	2	24.67	1380	154	9415.23	2	18
22802	2	14.66	4.9	0.726	58.5	2	73	3	1	1	19.33	928	0.058	7672.15	2	31
32581	1	17.49	7.32	0.829	58.5	2	83	3	3	2	36.85	1158	0.322	8002.39	1	49
34905	2	9.2	6.32	0.972	58.5	2	57	3	4	2	25.23	1789	0.023	14208.9	1	45
39433	1	11.28	5.92	0.888	58.5	2	80	3	3	1	32.94	1100	0.016	15075.8	2	44
46283	1	8.63	7.09	0.808	58.5	2	80	3	1	2	28.29	1206	257	7003.76	2	59
51071	2	11.92	9.61	1.011	58.5	2	80	3	5	2	28.46	1621	0.026	7242.45	2	67
15050	2	9.54	5.48	0.952	58.6	2	77	3	4	2		1685	77.8	4961.95	1	22
16186	1	16.61	9.02	0.451	58.6	2	75	3	2	1	29.97	1163	160	15909.9	2	23
25175	1	14.31	10.83	0.78	58.6	2	70	4	1	2	26.33	1163	0.011	4489.41	2	35
30811	2	9.53	10.39	1.582	58.6	2	75	4	4	1	27.03	1707	1.01	2519.74	1	36
38897	1	15.59	15.42	1.15	58.6	1	78	3	2	1	29.66	1231	0.057	14511.7	2	53
39792	1	13.68	4.78	0.433	58.6	2	77	1	1	2	29.22	1377	165	1449.61	2	54
42269	1	10.33	7.52	1.238	58.6	2	69	2	1	1	27.88	1720	0.019	2155.15	1	65
46907	2	8.62	9.21	0.762	58.6	1	58	2	1	1	27.1	1445	262	4204.35	2	61
51137	1	19.54	9.84	1.787	58.6	2	76	3	3	2	24.36	1483	0.113	13092.6	2	60
19498	2	31.99	4.88	0.908	58.7	1	68	3	1	1		1916	516	18567.5	1	23
19947	2	34.77	3.99	0.552	58.7	1	66	4	1	2	18.52	2012	223	1118.97	1	25
22134	2	15.48	13.21	1.068	58.7	2	85	3	5	2	28.53	1311	0.071	5453.21	1	29
22137	2	10.52	3.31	0.811	58.7	2	77	3	4	1	26.85	1687	0.022	11664.4	2	35
25627	1	7.66	6.4	0.65	58.7	2	85	3	3	2	30.36	1175		8148.88	2	39
22333	2	9.72	4.69	0.624	58.8	1	68	4	4	1	24.46	1780	0.03	3539.03	2	37
26227	2	6.78	9.47	0.904	58.8	2	70	1	1	1	31.44	1216	0.011	2336.96	1	40
41691	2	27.1	11.61	0.708	58.8	1	60	3	3	2	31.98	1385	0.266	20182.9	2	63
42187	2	8.29	6.97	1.078	58.8	2	52	4	3	2	24.33	1933	634	8119.06	1	64
42392	1	20.53	4.15	0.593	58.8	2	65	4	2	2	49.76	948	0.033	2232.64	1	64
50637	1	26.38	13.14	1.499	58.8	1	80	3	4	2	26.34	2043		4505.96	2	71
10489	1	6.45	3.72	0.553	58.9	1	82	2	3	2		1463	0.28	8649.81	2	27
19485	2	8.87	9.01	1.068	58.9	1	59	3	5	2	29.79	1907	313	10036.4	1	14
22652	2	52.25	41.73	2.146	58.9	1	65	3	5	2	26.96	2261	0.518	7509.06	2	31
25217	2	13.29	6.99	0.872	58.9	1	74	3	4	2	25.64	1441	0.023	14881.7	1	32
29390	1	10.06	5.63	0.951	58.9	1	81	3	3	2	36.09	1458	0.011	7375.07	2	39
51569	2	17.36	11.78	1.724	58.9	2	56	3	3	2	25.94	2049	0.011	4055.19	2	69
13385	2	7.39	2.52	0.56	59	2	63	1	1	1	29.49	826	0.431	3928.47	2	27
24088	1	9.85	10.12	0.754	59	2	71	5	2	1	38.81	1503	0.141	18603.3	2	33
25764	2	8.84	6.01	1.463	59	2	53	4	3	2	39.93	1572	0.587	9334.57	1	41
32624	1	9.36	4.09	0.633	59	2	74	3	4	1	28.64	1064	0.256	16230.2	2	49
46599	2	6.8	4.82	0.44	59	2	59	2	2	2	24.3	1132	265	6511.31	1	72
10704	2	8	9.89	0.748	59.1	1	76	1	2	2	21.97	724	0.042	1988.69	2	27
15356	2	12.46	7.28	0.502	59.1	2	63	3	5	2	27.61	954	174	22339.3	2	14
15466	2	5.33	3.7	0.495	59.1	2	69	3	5	1	35.86	887	0.022	29699.6	2	22
25365	2	11.33	11.57	0.985	59.1	2	56	3	4	2	29.07	1733	0.043	17412.5	2	31
25595	1	7.18	2.45	0.579	59.1	2	85	3	5	2	21.48	738	0.015	6547.69	2	43
32924	2	8.11	3.29	1.168	59.1	1	53	4	1	1	49.8	1173	310	10793.6	1	49
34707	2	6.1	3.44	0.597	59.1	2	69	4	4	2	35.69	1291	0.041	3579.55	1	52
45186	2	10.73	5.26	0.705	59.1	2	63	4	4	2	42.39	2788	0.295	3533.2	2	74
47397	2	16.14	10.06	0.886	59.1	1	62	3	4	1	39.95	894	0.011	11416.6	1	63
49075	2	10.28	7.33	0.823	59.1	2	63	4	4	2	35.49	1388	341	2307.13	1	62
14572	1	10.74	8.38	1.058	59.2	2	85	3	1	1	26.57	1366	0.011	5808.49	1	23
17838	2	8.84	5.49	1.23	59.2	1	67	3	5	2	28.31	1657	0.019	15925.7	1	19
21104	2	12.54	9.17	0.691	59.2	1	70	4	1	1	29.33	1353	0.045	2477.79	2	35
22943	2	12.39	14.03	3.026	59.2	1	60	3	1	2	28.21	1396	210	4524.51	2	31
31441	2	6.74	5.21	0.39	59.2	1	62	4	4	1	33.74	949	24.1	1214.18	2	51
43612	2	5.84	3.7	0.573	59.2	2	56	4	2	1	26.88	1015	203	3035.12	1	63
44628	1	11.91	13.28	0.863	59.2	2	80	3	4	2	33.58	1156	0.011	8061.33	1	61
46761	2	7.8	3.92	0.832	59.2	2	65	4	4	2	27.17	1145	0.034	2896.43	2	70
47705	2	23.41	17.64	1.443	59.2	1	74	3	4	2	36.74	1657	0.011	9714.95	2	68
20303	2	2.38	5.06	0.192	59.3	2	62	3	2	2	19.58	918	352	8680.6	2	20
33605	2	10.85	5.64	1.11	59.3	2	68	3	4	2	44.17	1101	0.015	15176	1	54
36950	2	10.86	7.62	1.085	59.3	1	67	4	1	1	37.97	1734	10.8	2148.8	1	52
41671	1	13	7.13	0.472	59.3	1	80	3	3	2	25.76	1206	0.048	6486.28	2	60
44351	2	8.1	8.5	0.861	59.3	1	57	3	5	2	24.45	1791	0.022	32386.1	1	74
45764	1	6.69	5.08	0.869	59.3	1	80	3	4	2	22.45	1112	0.019	4936.51	1	63
48804	2	5.31	7.59	0.267	59.3	1	80	1	4	2	22.82	1416	0.331	3205.91	2	70
49875	2	7.75	11.61	0.953	59.3	2	57	4	2	2	32.27	1620	227	4003.55	1	74
51474	1	17.88	15.73	2.016	59.3	2	68	3	5	2	19.81	1742	331	20289.7	1	60
15261	1	9.97	6.62	0.9	59.4	2	64	2	1	2	35.56	1593	0.011	1177.81	1	17
17108	2	9.97	9.23	0.936	59.4	2	57	3	5	2	27.88	1845	0.011	24407.4	1	17
18508	2	13.69	5.78	1.26	59.4	2	60	1	4	2	29.85	2282		524.853	1	15
27671	2	8.64	6.18	0.563	59.4	2	62	3	3	2	23.42	1099	0.021	22768.5	1	38
36220	2	7.25	5.57	0.783	59.4	2	65	3	3	2	33.29	918	0.206	7196.63	2	44
37311	2	18.56	13.47	1.552	59.4	1	62	3	3	1	35.38	1700	0.022	27204.6	2	48
39621	2	9.83	9.01	0.962	59.4	1	78	3	1	2	24.75	1429	0.077	6471.81	2	49
46499	2	5.01	3.35	0.447	59.4	1	80	2	1	1	26.3	792	0.011	3112.23	1	62
17610	2	12.79	8.03	1.116	59.5	1	71	3	3	1	29.97	2043	0.017	10340.6	2	14
27635	2	7.91	3.15	0.716	59.5	2	56	3	3	2	29.61	1103	0.3	11795.3	1	39
31546	2	7.31	5.22	0.585	59.5	2	80	3	2	2	32.22	1204	110	10059.3	1	45
34249	1	9.87	7.46	1.045	59.5	2	81	3	3	1	23.59	1848	0.049	6109.17	2	44
34393	2	20.6	11.44	1.366	59.5	1	69	3	3	2	23.03	3064	240	25169.7	2	44
41576	2	7.39	6.21	0.732	59.5	1	68	4	2	1	34.2	875	133	2076.38	2	67
41579	2	21.93	17.21	0.832	59.5	2	71	3	3	2	19.12	1702	0.011	13092.6	2	60
49745	2	20.13	19.48	1.314	59.5	1	79	3	4	2	31.91	1601	0.042	3205.85	1	66
21181	2	14.76	8.47	1.351	59.6	2	61	3	3	1	34.57	2301	0.011	4846.59	2	30
22897	2	19.39	20.17	2.206	59.6	1	61	3	4	1	30.46	1487	387	19469.7	2	31
24771	2	12.79	7.07	0.925	59.6	1	77	1	1	2	20.93	1798	0.043	707.458	1	34
25043	1	10.22	9.96	0.685	59.6	2	85	4	2	2	28.99	1068	0.138	6487.6	2	31
28828	2	20.91	17.84	1.071	59.6	1	75	3	4	2	25.65	1689	0.011	7596.98	1	40
44381	2	17.66	8.31	0.67	59.6	1	75	3	3	2	28.93	1079	0.018	9598.09	2	68
48962	2	18.58	14.51	0.812	59.6	1	64	5	2	2	34.61	1712	0.078	12823.4	1	69
51018	2	13.66	7.28	2.386	59.6	2	65	3	2	1	30.16	2668	0.033	13593.1	2	60
51518	2	7.28	8.36	0.436	59.6	2	71	3	4	2	19.07	923		8204.44	1	63
10436	2	5.63	5.65	0.705	59.7	1	52	4	3	2	32.5	1248	0.367	4789.03	2	25
11578	2	11	12.34	0.795	59.7	2	55	1	2	2	28.15	1520	0.047	1978.08	2	27
24221	2	8.81	3.35	0.765	59.7	2	72	3	4	1	23.23	1386	0.038	13287.2	2	39
24836	2	15.73	6.91	0.768	59.7	1	81	3	3	2	29.31	1416		5328.57	1	32
25074	2	5.85	5.28	0.825	59.7	2	62	4	2	1	27.99	1187	0.219	4450.04	1	41
27482	2	4.35	3.42	0.286	59.7	2	69	4	2	2	21.67	761	0.089	8485.81	2	37
41966	2	6.99	4.4	0.49	59.7	1	62	5	3	2	21.36	760	0.032	14949.5	2	69
46282	2	21.22	18.48	1.397	59.7	1	60	4	5	2	23.44	2152	0.011	1433.91	2	73
49644	2	21.1	15.28	1.472	59.7	1	60	3	5	2	26.9	2671	0.011	23638.1	1	60
51102	2	7.81	6.9	0.467	59.7	2	70	3	3	2	29.89	1297	177	8069.88	2	68
19343	1	6.26	5.16	0.78	59.8	2	85	3	4	2	28.42	1089	0.054	6988.69	2	26
19559	2	8.43	7.78	0.904	59.8	2	76	3	2	2		1310	0.011	11119.8	1	21
20602	2	9.08	6.24	0.716	59.8	2	84	3	4	2	32.17	1516	0.011	3298.4	1	23
22136	2	10.26	6.2	0.483	59.8	1	70	1	1	1	31.47	1362	0.011	601.548	1	34
22850	2	10.98	11.7	1.531	59.8	1	83	3	4	2	29.65	2934	0.082	4870.51	2	39
35668	2	8.5	9.04	0.736	59.8	2	81	3	3	2	28.22	998	0.656	9327.77	1	45
36464	2	6.84	5.21	0.578	59.8	1	59	4	3	2	26.05	1582	276	15221.2	2	51
39725	2	12.91	7.96	0.541	59.8	2	79	3	2	1	27.45	1053	0.011	14248.8	1	44
43294	2	9.88	6.78	1.171	59.8	2	63	1	4	2	36.67	1548	0.011	1951.17	1	71
47815	2	20.16	8.57	1.548	59.8	1	62	1	1	2	29.02	1707	0.011	1877.02	2	71
16898	1	5.94	4.67	0.624	59.9	1	82	3	2	2	26.79	1779	0.03	2770.58	1	16
19178	2	13.54	8.52	0.78	59.9	1	69	3	3	2	24.33	1405	0.206	18400	2	24
25543	2	7.41	7.1	0.741	59.9	1	57	4	4	2	41.36	1627	0.063	16593.2	1	37
34771	2	7.85	6.4	1.139	59.9	2	60	1	3	2	31.36	1533	0.011	4631.19	2	57
40064	2	15.34	12.81	1.386	59.9	1	56	1	1	2	31.34	1786	0.025	2823.9	2	53
47203	1	15.11	7.07	1.716	59.9	1	73	4	5	2	28.47	2304	0.022	2354.38	1	74
11511	2	6.65	2.63	0.546	60	2	75	3	4	2	26.79	1123	0.026	5676.22	1	22
28917	2	9.53	2.57	0.59	60	1	67	3	2	2	26.96	1169	423	9019.23	2	31
32298	2	6.53	6.51	0.687	60	2	62	5	3	2	23.17	1263	0.029	27263.6	1	47
34173	1	6.67	6.93	0.809	60	1	78	3	3	2	20.58	1491	450	16980.8	2	48
35588	2	12.5	14.18	1.021	60	2	67	1	3	1	29.2	1358	0.2	2351.21	1	57
48658	2	6.5	4.53	0.755	60	2	80	3	1	1	22.6	1101	0.224	8087.71	2	61
50813	2	5.45	4.47	0.643	60	1	56	3	1	1	35.94	728	530	10401.9	1	61
24573	1	12.59	9.21	0.836	60.1	2	56	3	3	2	33.28	1949	0.726	17891.3	1	32
29456	1	7.3	8.7	0.474	60.1	2	83	1	1	2	33.51	894	0.011	1140.01	2	38
35624	2	6.26	5.57	0.482	60.1	2	62	3	4	2	18.73	1380	164	25124.6	1	55
38614	2	9.96	9.3	1.323	60.1	1	58	3	4	2	29.83	2033	299	33564.3	1	45
39278	2	4.25	4.45	0.274	60.1	1	60	3	1	2	23.15	540	216	10508.3	2	50
43824	1	8.27	6.63	0.633	60.1	2	79	3	3	2	26.08	1045	0.011	14426.8	2	72
43962	1	10.03	5.48	1.421	60.1	1	74	3	3	1	27.59	1461	0.034	10740.7	1	67
11217	2	23.2	14.81	1.672	60.2	1	74	3	3	2	36.68	2036	0.455	9717.52	2	26
15642	2	8.36	7.92	0.67	60.2	2	66	1	1	1	37.5	1084	0.011	1457.59	2	28
43794	2	7.58	5.05	0.701	60.2	2	70	2	5	2	44.11	911	0.041	2552.42	1	72
17414	2	6.94	5.1	0.618	60.3	1	63	3	3	2	24.19	1393	675	5068.04	2	23
35493	2	37.69	9.97	1.015	60.3	1	69	3	4	2	28.09	1744	0.011	41106.6	2	46
37702	2	5.95	5.08	0.581	60.3	1	71	3	3	2	24.75	1702	0.011	9050.48	1	47
38689	2	8.73	7.55	2.123	60.3	1	62	4	2	1	30.05	1120	295	1137.66	1	48
40389	2	6.25	7.51	0.631	60.3	1	71	3	3	2	49.13	1190	0.011	2941.18	2	47
47375	2	8.47	5.31	1.745	60.3	1	61	3	4	2	28.62	1185	0.011	9216.84	2	62
48819	1	4.68	4.61	0.352	60.3	2	80	3	4	2	26.03	882	0.011	19558.2	2	60
13604	2	9.67	6.97	0.62	60.4	2	67	3	2	2	26.02	935	0.223	16400	1	21
27730	1	22.04	8.96	1.02	60.4	2	85	3	3	1	22.94	1514	0.011	5905.03	2	39
42692	2	6.62	7.77	0.658	60.4	2	63	1	1	2	31.09	873	2.18	2815.38	1	65
44061	2	10.03	4.56	0.876	60.4	2	80	3	5	2	24.41	1169		8501.19	2	67
50517	2	20.5	10.54	1.259	60.4	1	63	3	4	2	36.53	1411	0.011	12251.8	1	60
15813	2	9.16	4.83	1.204	60.5	2	61	1	2	2	23.6	996	0.028	1087.55	2	17
20924	2	42.7	7.98	0.809	60.5	1	72	4	2	2	31.93	2239	0.177	7544.62	1	14
21345	2	6.1	5.1	0.48	60.5	2	63	4	3	1	29.21	1159	0.046	4126.65	2	37
22637	2	7.85	10.09	0.592	60.5	1	65	1	2	2	36.22	1529	0.054	617.564	2	38
28750	2	8.01	10.89	0.801	60.5	2	75	3	3	1	22.22	1209	0.011	9957.65	1	37
34582	2	6.6	4.08	0.554	60.5	1	61	4	2	1		1053	5.11	5200.13	1	46
35528	2	9.76	6.61	1.464	60.5	1	71	3	3	2	24.54	1309	0.149	5788.77	1	49
47758	2	6.5	5.17	0.568	60.5	2	71	3	5	2	27.57	961	0.407	18574.5	2	60
50765	2	5.04	4.78	0.362	60.5	2	64	4	1	2	28.83	944	0.088	3308.38	1	71
36065	2	11.22	8.7	0.773	60.6	2	55	3	4	2	23.07	1196	0.074	17248.6	2	47
38678	2	10.29	8.46	1.179	60.6	2	68	3	3	2	25.63	1206	0.116	9723.3	2	44
42453	2	10.67	11.26	0.949	60.6	1	74	3	2	2	35.15	2147	0.011	1779.56	2	63
13215	2	31.32	11.76	0.959	60.7	2	59	3	3	2	30.08	2088	0.852	27806.4	1	19
16736	1	9.12	6.15	1.437	60.7	2	85	3	4	2	21.3	1299	0.03	4382.55	2	20
19813	2	6.69	6.94	0.448	60.7	1	57	4	2	2	27.65	1098	54.9	8585.28	1	20
24295	2	13.87	4.01	1.336	60.7	1	60	1	3	1	33.57	1813	241	463.252	1	34
26422	2	9.33	10.11	1.329	60.7	2	60	1	5	2	30.29	1483	0.011	4313.5	2	38
27312	2	5.51	3.41	0.657	60.7	1	65	1	1	2	24.54	1345	0.011	688.592	2	43
39728	2	8.08	4.53	0.671	60.7	2	64	3	3	1	29.03	984	0.011	52231.6	2	55
42389	2	6.34	7.49	0.595	60.7	2	64	3	3	2	22.11	896	396	20686.4	2	63
42441	2	8.99	5	0.79	60.7	1	64	5	3	2	30.77	1101	351	12701.1	2	70
44281	2	21.91	10.89	1.216	60.7	2	74	1	1	1	25.06	1320	0.011	4574.83	1	66
13463	2	8.38	6.73	1.083	60.8	1	80	3	1	2	28.41	1845	0.038	3818.92	2	14
22418	2	13.45	6.92	0.686	60.8	2	83	3	5	2	27.98	1580	0.094	5304.59	1	29
[truncated: 5,526 more rows]

## Sheet: Sheet1
SEQN	cataract	iron	zinc	copper	sele	gender	years	race	education	diabetes	BMI	calore	cottine	weight	SDMVPSU	SDMVSTRA
47963	2	0.96	0.18	0.196	0.5	2	60	4	2	1	37.97	345	0.034	4863.08	1	68
51498	2	0.19	0.73	0.326	0.9	2	56	3	2	2	20.65	34	250	7326.26	1	61
42099	2	1.84	1.41	0.465	1.3	1	66	3	5	2	36.66	231	7.91	9259.27	1	67
12902	2	0.51	0.34	0.251	1.6	1	60	4	2	2	21.71	314		8417.08	1	16
48458	2	2.53	0.51	0.023	2.1	2	51	4	3	2	31.64	860	261	11204.6	1	63
47331	2	3.29	4.9	0.513	2.8	1	65	2	1	1	28.27	640	0.011	1230.42	1	62
13686	2	0.42	0.34	0.105	3	2	51	4	3	2	26	290	0.266	8707.95	2	15
37755	2	2.95	2.28	1.106	4.7	2	57	1	4	2	17.88	726	0.021	2964.1	1	57
15389	2	0.24	1.84	0.053	4.8	1	72	4	2	2	35.74	535	0.035	1659.39	1	25
47156	2	2.86	2.83	0.453	4.8	2	60	4	4	2	42.25	1280	0.113	4898.62	2	67
34904	2	1.89	2.04	0.25	5.3	1	61	4	2	1	19.7	621		1402.03	2	45
40154	2	1.98	0.92	0.11	5.8	2	62	1	1	1	37.5	380	0.105	1840.08	1	55
24648	2	3.84	3.4	0.416	5.9	1	53	4	3	2	26.87	871	295	13117.7	1	41
28010	2	0.95	0.59	0.089	5.9	2	67	2	1	2	34.39	171	1.04	3941.37	2	41
14953	2	7.57	1.16	0.294	6.3	2	73	2	1	2	28.66	345	0.056	16475.4	2	27
43769	1	2.09	0.96	0.433	6.4	2	80	3	1	2	27.02	836	0.315	10329.5	2	60
12759	1	1.12	0.72	0.069	7	2	78	4	1	1		164	1.95	2246.14	1	27
23446	2	5.4	2.07	0.235	7.2	2	63	3	1	2	32.65	273	0.452	4993.68	2	31
10375	1	3.27	1.79	0.758	8.1	1	75	3	4	2	22.27	474	120	5017.48	1	16
22551	2	4.41	3.52	0.838	8.6	1	53	4	4	2	26.16	1676	423	3395.78	2	39
28419	2	2.67	0.55	0.291	8.7	1	74	4	2	2	20.24	819		3362.21	2	31
50060	1	1.52	1.7	0.371	8.8	1	80	3	5	2	21.91	507	0.075	5383.94	1	60
35957	2	3.05	2.12	0.609	8.9	2	59	3	2	2	33.1	633	221	13604.5	2	54
37497	2	5.49	4.75	1.06	9.3	2	62	3	4	2	31.64	413	169	6908.3	1	46
17855	1	3.29	1.77	0.788	9.6	2	71	3	4	2	23.38	609	0.011	6228.29	1	16
13488	2	2.94	1.36	0.372	9.8	1	70	2	1	2	26.96	396	214	4159.94	2	27
31527	2	3.89	1.91	0.319	10.2	1	59	3	4	2	21.34	1177	333	10028	2	56
25264	1	10.35	8.42	0.713	10.6	1	85	3	5	2	30.41	1025		9258.42	2	30
28740	2	2.58	1.51	0.401	10.6	2	66	3	3	2	27.8	375	0.018	25494.2	2	34
25305	2	3.49	2.29	0.485	10.8	1	56	1	1	2	26.97	696	0.085	2240.88	1	41
28781	1	0.62	1.95	0.227	11	2	73	5	1	2	27.2	468	0.02	9896.7	1	34
38010	1	3.21	3.03	0.576	11.2	2	81	4	3	2	32.76	591	149	3785.97	1	44
43726	2	21.03	17.14	0.537	11.2	2	76	4	4	1	30.46	577	0.027	6996.43	2	66
33646	2	3.3	2.46	0.476	11.3	1	63	3	4	2	26.23	488		14934.6	2	48
20920	2	1.41	1.25	0.229	11.4	1	81	4	1	2	31.47	376		12778.2	1	27
50170	2	2.16	1.67	0.457	11.5	2	63	2	1	2	23.3	479	0.114	1198.79	2	61
18599	2	2.98	1.87	0.48	11.6	2	77	3	2	2		669	0.027	5536.81	2	23
16664	2	3.46	1.18	0.488	11.8	2	65	4	3	2	36.61	475	0.414	5880.11	2	20
19554	1	2.53	1.04	0.469	12	2	85	3	3	2	23.56	308	0.011	3412.98	1	15
46236	1	9.83	5.59	0.891	12.1	2	80	5	1	2	27.63	840	494	5062.27	1	59
51592	2	2.63	0.77	0.247	12.1	2	62	3	1	1	39.27	379		6392.91	2	59
16247	1	9.04	1.31	0.21	12.2	2	84	1		2	28.14	469	3.72	2454.89	2	27
20850	2	7.24	22.03	0.484	12.7	1	61	4	2	2	25.96	1707	0.325	1965.54	2	26
32300	2	4.11	2.92	0.416	12.9	1	53	4	5	2	17.2	950	189	2207.76	2	45
21054	2	2.95	2.22	0.404	13	2	59	3	4	2	26.89	478	0.011	12479.4	2	39
29943	2	1	1.41	0.13	13.1	1	60	4	2	1	26.99	331	181	1795.31	2	39
41167	2	1.08	1.14	0.232	13.1	2	52	4	3	2	44.5	401	0.027	4829.11	1	51
37071	2	4.03	2.04	0.733	13.5	1	59	4	3	2	25.67	1019	0.094	7242.41	1	44
45083	2	5.45	4.47	1.344	13.5	1	68	2	4	2	31.87	588	0.074	2334.72	1	71
27963	2	2.11	1.11	0.31	13.6	2	82	3	1	2	18.78	335	0.011	4880.46	2	39
11841	2	1.45	2.12	0.248	13.7	2	61	3	1	2		318	0.174	6827.6	1	24
40152	2	8.67	8.74	1.069	13.7	1	68	1	5	2	29.08	1013	0.011	1476.03	1	58
24059	2	3.29	1.93	0.327	13.9	1	78	4	3	2	27.1	642	366	2759.41	2	33
36582	2	1.95	1.09	0.173	13.9	2	61	4	2	2	19.38	262	3.24	3199.96	2	51
25288	2	2.44	1.32	0.193	14	1	76	3	1	1	22.4	340	309	3927.97	1	42
51019	2	2.16	1.67	0.139	14.2	1	63	2	1	1	26.58	345	0.024	1348.84	2	61
14071	2	4.43	4.49	0.479	14.5	1	69	3	5	2	27.91	591	0.011	11511.6	2	19
46629	1	2.64	2.98	0.355	14.7	1	80	3	2	2	27.69	792	0.032	3585.93	2	60
26340	2	3.79	1.95	0.303	14.8	2	50	4	3	2	35.62	780	1.08	14398.7	2	39
35235	1	4.39	2.28	0.555	15.2	2	82	5	3	2	30	680	0.04	13305.1	2	57
27363	2	3.45	1.46	0.46	15.3	2	58	4	4	2	43.27	695	0.02	14055.9	1	41
44928	2	7.85	3.39	1.273	15.8	1	77	4	3	2	30.08	1103	0.035	2300.23	1	64
14069	2	3	2.8	0.306	16.1	1	61	3	1	1	32.19	1090	671	8694.15	1	19
49147	2	4.55	4.99	0.517	16.1	2	64	1	1	2		1065	0.028	2979.12	2	72
24168	2	1.59	1.76	0.196	16.3	2	66	4	1	2	27.23	223	0.045	3535.38	2	31
41984	1	1.17	1.33	0.289	16.3	2	78	2	4	2	34.91	254	0.011	3262.65	1	72
15262	2	4.59	1.81	0.599	16.4	1	81	3	2	2	22.72	958	2.58	3526.79	2	18
17092	1	4.09	3.04	0.465	16.4	1	85	3	1	2		898	0.068	4265.27	2	20
48648	2	3.72	2.57	0.455	16.4	1	61	4	2	2	21.89	737	302	1416.86	2	62
20918	2	9.2	2.31	0.555	16.5	1	63	1	1	1	25.85	567	0.011	1377.28	1	15
22415	1	4.74	3.14	0.619	16.5	2	84	3	4	2	30.08	612	0.011	6382.28	1	31
46731	2	1.65	0.92	0.338	16.5	2	62	1	3	1	36.64	464	0.017	3217.26	2	70
46345	2	1.68	2.39	0.376	16.7	2	59	1	4	2	26.89	548	0.011	4608.06	1	66
46972	1	3.86	5.08	0.905	16.7	2	66	3	3	2	22.1	1202	0.017	14203.5	2	64
51336	2	0.76	2.32	0.647	17	1	57	2	4	2	27.5	1005	0.088	2103.17	2	61
12820	2	1.66	1.26	0.251	17.4	2	56	4	2	1	29.78	334		6693.19	1	16
49092	2	2.96	2.98	0.417	17.4	1	80	3	5	2	24.42	749	136	3910.48	1	70
39638	2	4.88	1.76	0.291	17.5	2	70	3	2	2	22.61	953	287	8158.94	2	48
41026	1	3.86	2.26	0.568	17.6	2	83	4	1	2	24.46	561		3739.45	1	49
46807	2	15.62	3.2	0.596	17.6	1	66	3	2	1	26.72	747	6.85	4975.16	1	61
18412	2	5.18	2.25	0.336	17.7	1	63	5	2	2		316	48.9	3449.44	1	17
21096	2	4.7	3.31	0.61	17.8	2	68	3	4	2	21.95	605	0.053	10864.2	2	31
23531	2	3.14	0.83	0.239	17.8	1	70	3	1	2	25.87	266		15286.7	1	32
26330	1	5	2.71	0.488	17.8	2	77	3	2	2	27.85	617	0.026	8903.28	2	34
18663	2	1.98	2.12	0.265	17.9	1	71	5	3	1	22.22	404	238	10324	2	23
39244	2	8.8	5.29	0.362	17.9	2	60	1	1	2	29.53	492	0.025	454.562	1	58
44460	2	5.66	4	0.522	17.9	2	75	1	4	2	37.07	739	0.062	1574.94	2	64
44190	2	7.52	0.82	0.367	18	2	71	4	2	2	21.89	379	0.03	2834.71	1	73
12578	2	4.25	2.11	0.514	18.1	1	73	3	5	2	28.84	830	0.011	12617.2	2	19
12067	2	3.98	5.63	0.568	18.2	1	62	1	2	2	28.97	623	0.011	309.351	1	28
36746	2	3.2	10.36	0.614	18.2	2	59	4	4	2	32.09	381	0.473	6978.73	2	53
44285	2	15.58	5.95	1.468	18.2	1	55	4	3	2	30.95	1662	0.969	4207.62	2	68
30052	2	20.81	4.51	0.766	18.3	2	71	3	3	1	36.5	975	0.011	10012.5	1	33
41827	1	4.02	2.1	0.826	18.3	1	78	3	5	2	25.65	676	0.017	6666.68	1	63
10363	2	2.55	2.19	0.436	18.4	2	67	1	2	2	23.97	640	0.011	3057.43	2	17
26871	2	8.83	5.32	0.257	18.4	2	61	1	1	1	35.54	389	0.016	724.149	1	40
26883	2	2.29	2.38	0.204	18.4	1	72	3	3	1	26.7	731	0.351	3697.1	1	33
15139	2	3	2.04	0.34	18.5	2	63	4	2	2	32.72	498	0.145	3228.29	1	16
30423	2	0.75	3.29	0.156	18.7	1	75	4	1	2	35.29	603	0.316	5065.49	2	33
45285	2	4.89	1.82	0.583	18.7	1	66	3	2	2	29	635	1.21	4844.63	1	67
28400	2	3.69	2.23	0.466	18.9	2	75	1	1	1	25.49	523	0.011	1205.46	1	39
33729	2	6.04	3.96	0.683	18.9	2	69	4	3	2	22.16	1151	0.076	4733.93	1	52
16179	1	3.27	1.77	0.338	19	2	85	3	1	1		639	0.018	15763.8	1	23
51237	2	1.78	1.13	0.106	19	2	80	2		2	30.02	406	0.011	1541.51	1	62
20526	1	4.41	2.38	0.766	19.2	1	85	3	3	2	24.04	786	1.51	6985.82	2	22
28288	2	2.3	1.18	0.134	19.2	2	73	1	1	1	40	476	0.027	1452.94	1	34
35352	1	4.19	2.31	0.418	19.2	2	85	4	4	2	22.02	515	0.022	7300.22	2	49
43305	1	2.11	3.88	0.431	19.2	2	77	3	2	1	31.37	429	115	11936.4	1	59
47404	2	9.42	4.19	0.439	19.2	1	50	4	5	2	33.64	914	1.25	10361.8	1	65
13814	2	2.49	2.18	0.216	19.3	2	65	3	3	1	34.2	446	0.025	12776.3	2	20
16808	2	6.49	4.56	0.569	19.3	1	63	3	3	2	25.19	1047	0.028	24187.4	2	22
34988	2	18.86	3.44	0.829	19.3	2	71	4	2	2	37.13	928	0.021	3739.45	1	49
46603	2	3.55	3.29	0.512	19.3	2	73	3	3	1	30.93	508	0.011	9962.9	1	60
28092	2	2.85	1.67	0.229	19.4	1	68	3	1	2	24.33	622	8.91	18752.3	2	34
49899	1	2.17	2.6	0.296	19.5	2	80	3	5	2	26.93	672	0.011	6066.59	1	60
23585	2	6.15	4.3	0.639	19.6	2	79	4	3	2	31.4	472	0.015	4018.45	1	36
41612	1	3.03	2.56	0.581	19.6	2	80	3	2	2	28.65	969	0.011	7857.41	2	60
42985	2	6.53	2.72	0.707	19.6	1	63	3	2	1	25.75	2417	7.37	3558.66	1	59
17202	2	9.16	5.93	0.428	19.8	2	58	3	4	2	26.47	987	0.018	32425	2	23
24126	1	5.53	4.73	0.555	19.8	1	77	1	1	1	25.99	926	0.022	482.68	2	40
19364	2	5.16	3.78	0.768	19.9	2	80	3	3	2	25.1	1001	0.151	2822.44	2	15
47594	1	7.12	2.95	0.864	20.1	1	80	3	5	1	30.48	963	0.07	4009.91	1	63
24571	2	6.27	4.08	0.911	20.3	2	67	4	3	1	28.77	1056	0.032	3429.45	1	42
45953	1	3.8	2.91	0.298	20.3	2	80	4	1	2	18.85	887	0.064	2632.44	1	67
49944	1	7.5	1.85	0.236	20.3	2	63	1	3	1	26.1	303	0.025	3777.38	1	66
42287	2	3.82	2.07	0.487	20.4	2	66	4	4	2	24.83	912	304	2464.4	1	74
43153	1	3.06	1.46	0.103	20.4	1	64	4	1	2	31.98	801	335	4229.86	2	65
38065	2	17.28	3.68	0.794	20.6	1	66	4	2	2	26.92	794	1.09	2166.19	2	49
31603	2	6.94	7.58	0.623	20.7	1	79	3	2	2	29.12	826	0.272	3183.77	1	45
46548	1	4.67	3.89	0.552	20.7	1	80	4	1	1	22.86	748	0.131	2295.14	1	67
42531	2	22.97	9.2	1.162	20.8	2	63	4	5	1		686	0.02	2245.29	1	67
44476	2	3.17	3.4	0.485	20.8	1	80	3	1	2		548	0.276	5049.11	2	59
15691	2	3.87	4.75	0.225	20.9	1	80	4	1	2	22.46	709	0.981	1490.83	1	20
28644	2	3.05	2.77	0.381	20.9	2	85	1	5	2	23.86	591	0.019	1126.26	2	38
35313	2	24.5	6.02	0.748	21	2	76	5	1	2	21.06	864	252	10119.4	2	47
49339	2	8.45	6.5	1.062	21	2	61	2	5	2	22.76	760	90.5	1406.44	1	69
32272	2	4.07	1.68	0.43	21.2	2	83	3	2	2	29.93	737	0.035	5260.01	2	44
35100	2	4.08	2.36	0.425	21.2	2	60	4	1	2	28.82	535	0.023	2618.51	2	52
21702	2	3.86	4.42	0.473	21.4	2	62	3	4	2	35.4	1735	0.011	10098	2	42
35455	2	4.27	3.19	1.043	21.4	2	53	4	5	2	40.65	763	387	12063.7	1	47
37556	2	14.01	5.22	0.519	21.5	1	58	4	4	2	33.02	1132	0.011	7655.84	1	49
10725	2	7.44	2.49	0.73	21.6	2	67	4	2	2	29.73	706	0.07	1700.47	2	25
31506	2	18.66	7.03	0.728	21.7	1	73	3	1	2	25.02	941	0.03	6043.32	2	44
45282	2	4.44	5.41	0.787	21.7	1	74	3	3	2	30.07	1561	426	1570.94	1	61
18879	2	4.81	3.83	1.209	21.9	2	56	3	5	2	20.74	828	0.011	27264.1	2	27
21790	2	4.69	0.97	0.329	21.9	2	61	1	4	2	31.27	401	130	2394.2	2	40
36437	2	4.47	3.66	0.496	21.9	2	50	4	1	2	27.36	1231	0.058	7554.49	1	56
43344	2	4.32	3.74	0.409	21.9	2	59	2	1	1	31.8	513	0.011	2950.84	2	69
26017	1	3.31	1.59	0.276	22	2	83	3	1	2	24.1	859	1.4	10740.6	2	39
51591	2	9.29	4.26	1.263	22	2	80	3	3	2	29.53	1359		4997.95	1	61
16037	2	4.22	2.54	0.28	22.1	1	60	4	5	2		729	0.011	1258.16	2	28
23798	1	2.17	3.92	0.427	22.1	2	83	3	4	2	24.98	614	3.29	5012.44	2	32
15146	2	6.42	4.59	1.075	22.2	1	64	4	4	2	31.28	1242	0.011	3666.62	2	28
25918	1	4.43	1.35	0.265	22.2	2	84	3	1	2	29.12	1059	103	10081.4	1	38
50897	1	6.65	4.08	0.722	22.4	2	67	2	1	2	36.22	1046	0.042	2754.55	2	61
28848	2	4.3	3.84	0.489	22.5	2	54	4	5	2	21	689	0.011	14975	1	39
28044	1	3.47	2.22	0.322	22.7	2	79	3	4	2	26.2	941	0.011	8910.08	2	35
20308	2	14.33	5.29	1.112	22.8	1	71	4	1	2	27.74	861	0.011	4192.55	2	20
38131	2	4.85	4.04	0.75	22.8	2	64	1	1	1	24.41	696	0.04	1004	1	56
42764	2	3.24	1.75	0.187	22.8	2	68	4	2	2	23.56	386	456	4554.4	2	64
16340	2	5.2	5.25	1.154	22.9	1	77	3	5	2	27.43	809	0.011	6192.83	2	19
28291	1	3.68	1.73	0.319	22.9	2	64	3	1	1	27.45	360	61.5	5597.53	1	42
43493	2	8.66	4.07	0.172	22.9	2	60	1	1	2	41.75	397	0.032	2425.53	2	61
49161	2	5.47	1.75	0.793	22.9	1	55	4	1	2	26.29	956	0.387	5137.52	2	61
46526	2	16.31	9.06	0.963	23	2	55	3	4	2	24.39	2149	0.011	44476.9	1	60
51459	2	6.35	2.87	0.624	23	2	72	3	1	2	25.07	1010	0.17	4309.49	2	59
19429	2	3.44	1.34	0.279	23.1	1	78	4	1	2	22.26	498	77.9	899.333	1	20
24871	2	2.78	1.49	0.177	23.1	2	69	4	1	2	28.43	450	0.072	2711.72	2	35
36754	2	3.79	2.61	0.329	23.1	2	50	4	4	2	37.88	1433	0.063	4047.52	2	58
12260	2	8.42	2.74	0.614	23.2	2	78	4	4	2	29.6	720	0.011	2363.23	2	14
51614	2	8.71	1.86	0.502	23.2	1	57	3	4	2	22.63	1674	4.1	3841.22	1	60
14643	2	4.75	2.36	0.418	23.3	2	58	3	3	1	31.78	864	168	11194.3	1	26
24622	1	5.16	2.12	0.361	23.3	1	66	1	2	1	27	975	0.011	2325.85	1	34
46704	2	5.4	2.24	0.432	23.3	1	59	4	3	1	35.16	637	0.011	4494.78	1	59
12702	2	2.75	1.01	0.246	23.4	2	51	4	2	2	32.12	686	274	11114	1	24
46447	2	8.59	2.27	0.398	23.4	2	65	1	1	2	23.15	636	0.032	1060.35	2	71
48531	1	13.35	2.95	0.38	23.4	2	69	4	5	1	24.54	482	0.011	5434.29	2	67
13796	2	3.23	4.08	0.245	23.5	1	71	3	5	2	25.64	1059		11962	2	16
20992	2	6.17	2.41	0.608	23.5	2	61	1	4	2	28.94	574	0.011	457.382	1	17
42298	2	5.96	7.85	0.413	23.5	2	57	1	3	2	23.83	640	0.054	7675.58	2	59
25653	1	2.04	1.24	0.143	23.6	2	68	3	5	2	34.03	335	0.011	5294.26	2	34
22047	2	6.3	3.09	0.59	23.7	2	72	1	3	2	22.93	665	0.025	1499.62	1	34
31636	2	11.45	1.76	0.314	23.7	2	72	4	1	2	33.96	1057	1.91	8341.7	2	49
47361	2	2.18	2.49	0.343	23.8	1	65	4	4	2	25.06	1657	507	3461.14	1	71
18831	1	5.74	5.93	1.607	23.9	2	76	3	4	2		807	0.011	8043.57	2	19
11817	2	3.54	2.47	0.358	24	2	68	1	1	2	29.89	581	0.011	1397.49	2	17
20337	2	5.12	3.09	0.484	24	1	80	4	2	2	27.31	1234		1520.57	2	20
27170	2	3.89	2.31	0.631	24	2	84	3	4	2	27.52	918	0.089	5786.06	1	31
43757	2	5.06	4.8	0.506	24	2	62	1	1	2	29.92	1138	0.011	2877.88	2	66
34625	2	4.19	2.77	0.474	24.1	2	74	4	5	2	36.89	501	7.97	3851.58	1	55
47614	2	3.92	5.67	0.845	24.2	2	75	3	1	2	29.63	1348	0.011	12202.9	2	60
50809	2	12.39	9.49	0.888	24.2	1	80	3	1	2	30.01	845	0.016	3705.38	1	61
21993	1	3.56	4.98	0.266	24.3	1	85	4	1	2	19.12	339	185	4258.64	2	31
25348	1	4.87	2.99	0.411	24.3	1	75	1	1	2	26.22	871	0.029	884.375	1	34
17158	2	4.51	1.95	0.469	24.4	2	62	3	4	2	26.9	1204	213	17783.4	1	24
46716	2	4.79	5.86	0.505	24.4	2	52	4	5	2	30.97	894	0.015	8520.52	2	70
35667	1	3.47	3.71	0.642	24.5	2	73	3	4	1	39.93	629	0.027	20060.7	1	46
41873	1	5.22	2.68	0.982	24.6	2	78	3	3	2	24.31	928		10148.4	2	70
12624	2	4.02	3.35	0.571	24.7	1	70	1	4	2	30.54	722	0.018	582.448	1	17
18962	2	6.58	2.96	0.802	24.8	1	65	4	2	2	20.17	746		838.169	2	26
44594	1	7.92	4.34	0.719	24.8	2	80	3	3	2	24.89	698	0.032	7998.13	2	70
46468	2	4.41	2.64	0.236	24.8	2	60	4	2	2	24.51	643	6.46	2367.72	1	59
48247	2	6.56	5.13	1.123	24.8	1	70	3	2	2	28.56	2158	0.022	9386.07	2	64
23879	2	19.79	7.93	0.591	24.9	2	66	3	4	1	35.66	716	0.124	28904.5	1	37
44904	2	6.45	8.77	0.468	24.9	1	57	4	4	2	30.55	568		4092.95	1	65
12745	2	3.59	1.93	0.403	25	1	75	3	3	1	27.88	482	0.036	7803.34	2	17
15765	1	5.84	6.52	0.481	25	2	85	3	4	2	29.31	959		3797.35	2	19
27286	2	8.6	4.93	0.577	25	2	80	3	3	2		982	0.011	5466.98	2	39
25246	2	11.56	5.65	0.73	25.1	2	55	3	4	2	29.68	627	0.021	12342.9	1	29
37455	1	2.92	2.3	0.228	25.1	1	64	1	2	1	34.99	512	174	11203	2	54
14097	2	5.28	5.94	0.403	25.2	1	50	4	2	1	26.67	576	0.035	12197.8	1	27
29619	2	4.58	3.51	0.547	25.2	2	67	3	3	2	36.97	817	0.016	26013.9	1	38
48322	2	2.36	2.89	0.286	25.2	2	60	4	2	2	22.95	248	240	1965.99	1	68
49026	2	2.49	2.33	0.276	25.2	2	75	3	4	2	42.97	462		13632.5	2	63
25234	2	2.54	2.4	0.298	25.3	1	78	3	2	1	30.83	672	0.139	13097.9	2	33
25384	2	4.69	7.9	0.38	25.3	2	52	4	4	2	27.33	1134	0.217	11752.7	2	33
28656	2	5.62	2.94	0.407	25.3	2	80	1	1	2	25.27	978	0.011	1754.1	1	34
34551	2	5.5	2.57	0.619	25.3	2	73	4	4	2	31.15	893	0.147	2748.83	1	52
45311	1	5.3	6.95	0.339	25.3	1	68	4	2	1	35.34	964	0.068	1687.62	1	59
46333	2	7.27	2.02	0.412	25.3	1	80	3	3	2	29.64	1223	0.029	4744.35	2	59
46885	2	3.32	3.49	0.41	25.3	2	70	1	1	2	37.02	561	0.016	1701.57	1	71
51140	2	3.7	4.8	1.027	25.3	2	60	4	3	1	37.6	1082	0.022	2475.17	1	59
51204	2	11.83	5.18	1.161	25.4	1	55	4	5	1	38.29	1380	0.017	4608.75	2	66
51545	2	3.06	2.64	0.414	25.4	2	65	3	3	2	24.74	509	284	5596.43	2	63
13066	2	3.59	2.47	0.494	25.5	2	66	1	1	2	35.34	627	0.244	3186	2	27
14379	1	11.21	7.51	0.936	25.5	1	85	3	4	2	26.86	1099	0.035	4226.9	1	24
13254	2	5.15	4.02	0.381	25.6	2	62	4	4	2	28.83	1423	0.112	1185.43	2	26
20362	2	2.88	2.43	0.145	25.7	1	55	4	2	2	18.61	512	413	7389.07	1	16
10699	2	48.23	31.77	4.946	25.8	1	60	3	5	1	38.85	1152	0.018	11807.6	2	15
44842	1	3.77	5.44	0.347	25.8	2	73	3	2	2	25.31	959	184	9939.37	2	62
27995	1	4.97	3.3	0.385	25.9	2	65	3	4	1	26.51	1060	0.028	18852.7	1	37
41124	2	4.06	1.98	0.695	25.9	2	68	4	3	1	33.45	634	0.03	4005.82	1	51
45871	2	6.29	4.79	0.706	25.9	1	77	1	1	2	26.31	966	0.011	4529.53	1	66
25604	2	4.88	2.71	0.806	26.1	2	83	3	1	2	18.65	1043	0.022	5711.07	2	34
13260	2	4.55	1.63	0.875	26.2	1	56	2	2	2	25.31	818	0.159	30318.7	2	27
45088	2	3.31	2.5	0.349	26.2	2	73	3	4	2	37.85	644	0.079	12218.9	1	66
26877	2	2.63	1.75	0.369	26.3	2	80	3	1	2	24.07	463	0.07	5393.79	2	34
46955	2	22.36	3.07	0.429	26.3	1	55	3	2	2	24.54	551	0.021	48975.8	1	69
38368	2	5.67	2.27	0.645	26.4	2	60	3	4	2	29.86	649	0.016	25618.2	1	52
17236	2	11.86	5.62	2.323	26.5	1	67	4	5	2	23.56	2260	0.035	1042.53	1	19
17616	2	4.03	2.49	0.389	26.5	2	59	3	5	2	23.78	577	0.011	14504.3	1	14
38780	2	3.14	3.22	0.227	26.5	1	76	4	1	2	23.19	451	1.32	2261.61	2	50
17898	1	10.97	7.95	1.129	26.6	2	85	2	1	2		793	0.02	2854.95	1	17
10142	2	4.82	3.58	0.652	26.7	2	84	4	1	1	35.27	1268	0.081	2214.05	1	16
24839	2	2.8	3.47	0.381	26.7	1	61	4	2	2	29.96	463	0.021	3959.45	2	36
35495	2	3.01	3.09	0.307	26.7	2	76	1	1	2	22.71	632	0.028	10761.5	2	55
46569	2	5.45	6.81	0.496	26.7	2	63	3	3	2	31.63	732	341	5311.49	1	64
10090	2	6.2	4.31	0.607	26.8	2	57	4	4	2	46.69	1671	2.42	5511.57	1	21
17440	2	5.3	5.18	0.629	26.8	1	58	3	2	2	29.63	1056	17.2	4556.18	1	23
34361	1	28.2	23.94	1.301	26.8	2	85	3	1	2	31.56	1041	0.011	3988.32	1	44
35999	2	6.49	3.41	0.529	26.8	2	69	3	1	2	23.76	1534	422	30061.8	2	46
38250	1	3.58	2.59	0.524	26.8	2	85	3	2	2	26.31	786	0.062	20659	1	49
12676	1	3.43	1.78	0.311	26.9	2	85	4	1	2	30.5	576	0.108	3252.99	1	16
41775	2	4.82	5.52	0.838	26.9	2	61	4	2	2	34.75	1356	695	2245.39	1	68
30555	2	9.9	5.67	0.829	27	2	57	3	5	2	21.51	1119	0.011	51260.2	2	36
45889	2	7.83	3.56	0.686	27	2	67	1	2	1	26.72	942	0.031	1204.7	2	64
49799	2	11.67	4.74	0.844	27.1	2	69	3	1	1	27.19	1089	0.205	6172.5	2	59
38450	2	6.7	5.03	0.681	27.2	2	85	1	1	2		1042	0.098	1878.88	1	52
29809	2	9.18	4.72	1.396	27.3	2	73	3	3	2	23.05	1353	311	9506.04	1	33
41735	2	3.09	2.89	0.231	27.3	2	64	3	5	2	25.4	685	0.061	17170.4	2	62
45447	1	8.66	3.49	0.439	27.3	2	75	3	1	2	30.37	930	1.45	4770.62	1	67
26504	2	6.01	3.4	0.555	27.4	1	73	3	1	2	25.3	1236	0.011	16211.5	2	34
27679	2	2.68	1.23	0.244	27.5	1	54	4	1	2	26.2	1058	178	4749.46	2	36
36118	2	3.05	3.72	0.774	27.5	1	73	4	3	1	26.59	711	24.2	2292.91	1	55
40282	2	6.25	2.23	0.503	27.5	2	67	1	3	2	29.13	724	0.019	4075.67	1	55
31898	1	22.03	12.66	2.112	27.6	1	73	3	5	2	24.44	1712	65.2	6127.78	1	48
10254	2	4.81	4.41	0.315	27.7	2	68	3	2	2	36.81	609	0.085	9114.54	1	23
25805	2	19.37	4.68	1.467	27.7	2	82	3	1	2	21.79	1646		4590.87	2	29
31762	1	2.12	2.95	0.247	27.7	2	70	1	1	1	27.37	404	0.011	2345.9	1	56
41496	2	2.85	5.24	0.585	27.7	2	64	1	1	1	28.37	710	0.02	2019.28	1	71
41542	2	4.01	2.68	0.599	27.9	2	60	4	3	1	32.83	988	0.016	4266.65	1	59
46492	1	3.85	2.38	0.412	27.9	2	66	3	5	2	28.49	601	0.023	15838.5	1	60
10528	2	3.27	1.48	0.406	28	2	61	1	2	1	28.93	453		2257.38	1	22
19707	2	7.33	3.06	1.011	28	2	61	1	1	2	31.63	1214	0.021	551.075	1	15
32167	1	5.97	3.8	0.478	28	1	75	3	3	2	38.75	846	0.092	15742.5	1	49
33904	2	3.44	1.6	0.259	28	2	57	3	1	1	40.04	464	0.016	8784.6	2	49
12703	1	4.19	3.89	0.294	28.1	1	85	2	2	2		956	0.035	4349.03	1	25
15799	1	3.88	3.43	0.438	28.1	1	85	1	1	2	28.11	660		572.87	2	28
36690	2	3.47	1.82	0.234	28.1	2	85	3	1	2	21.83	994	0.162	14872.3	2	51
50482	2	2.16	1.76	0.295	28.1	1	80	4	3	1	30.01	680	0.193	2193.19	1	74
51622	2	12.14	4.1	0.587	28.1	2	60	4	1	2	31.53	1328	0.077	4461.13	1	73
40462	1	12.85	3.03	0.649	28.2	2	81	3	4	2	28.64	604	0.011	10799.4	1	50
43438	2	3.41	3.22	0.332	28.2	2	77	3	1	1	30.26	546	201	4123.97	1	61
47363	1	18.74	9.24	0.495	28.2	2	75	2	1	1	40.18	712	0.011	1526.21	2	70
49973	2	16.36	5.12	0.848	28.2	2	64	3	4	2	23.07	1177	0.011	12613.8	2	64
23096	2	6.86	4.33	0.832	28.3	2	85	3	3	2	21.03	1069	0.047	4993.37	2	35
27784	1	14.21	6.71	1.269	28.3	2	72	1	2	2	31.72	1060	0.011	668.764	1	43
41126	2	4.12	3.7	0.828	28.3	1	80	3	1	2	22.73	920	0.046	5177.22	2	46
14096	2	5.4	4.18	0.559	28.4	2	67	1	1	2	37.35	1083	0.029	1699.93	2	27
44275	2	2.85	2.54	0.204	28.5	1	62	4	4	1	21.99	662	537	4123.55	2	61
26342	2	10.24	2.88	0.553	28.6	2	77	5	3	2	25.1	1108	0.034	11886.7	1	42
26434	2	4.59	5.14	0.527	28.7	1	82	3	3	2	22.75	759	0.437	6567.52	2	29
47264	2	3.17	2.76	0.345	28.7	2	80	3	2	2	22.58	1182	0.019	7578.09	2	60
10682	2	12.19	2.61	1.236	28.8	1	62	4	4	2	30.15	989	0.035	4050.12	1	25
12913	1	10.25	8.68	0.665	28.8	2	84	3	2	2		823	0.011	9248.27	2	19
31039	2	7.1	6.42	1.058	28.8	2	65	4	4	2	23.12	1206	0.06	3404.1	1	41
20045	2	3.78	1.24	0.359	28.9	2	69	1	1	2	24.12	398	0.117	3083.17	2	27
29079	2	3.63	3.33	0.342	28.9	2	85	1	1	1	26.33	561	0.04	973.748	1	34
36957	2	4.99	3.36	0.43	28.9	2	72	4	1	2	32.97	862	0.016	3059.68	1	50
37518	2	5.51	4.59	1.176	28.9	2	63	3	5	2	38.44	868	0.015	42982.6	2	46
42869	2	3.52	3.86	0.285	28.9	2	64	3	3	2	29.28	1187	256	5604.52	1	67
50638	2	3.7	2.91	0.379	29	2	66	1	1	2	35.07	653	0.108	982.787	1	59
14958	2	7.76	4.68	0.566	29.1	2	67	1	1	2	24.03	618	351	956.422	2	27
44055	1	4.32	4.21	0.544	29.1	2	80	3	1	2	33.49	815	0.011	11826.2	2	62
44600	2	1.85	1.41	0.276	29.1	1	62	4	5	2	22.75	934	0.887	1702.1	2	67
46275	1	4.83	2.5	0.417	29.1	2	73	4	3	1	29.36	732	0.656	3468.16	2	66
42873	1	4.8	2.89	0.583	29.2	2	80	5	1	2	31.97	665	0.083	5046.49	1	62
44614	2	3.61	2.54	0.275	29.2	2	62	4	2	2	26.01	858	412	1734.33	1	67
47778	1	3.49	2.95	0.212	29.2	2	67	3	2	1	31.54	469	439	8921.72	2	62
13795	2	6.72	5.66	0.399	29.3	2	57	4	4	1	24.88	634	0.035	5530.74	1	27
31079	2	14.87	4.74	0.431	29.3	1	64	1	2	2	32.28	977	0.236	1405.5	1	41
42981	2	5.07	5.95	0.605	29.3	2	65	1	2	2	28.62	835	0.099	1566.78	1	71
48796	2	12.14	4.53	0.873	29.3	2	77	3	2	2	31.9	792	0.011	5967.8	2	66
15185	2	3.08	1.59	0.197	29.4	2	58	4	2	1	21.02	497	162	16795.9	1	15
19883	2	2.32	1.62	0.184	29.4	2	65	4	2	2	28.77	369	2.75	12596.1	2	22
14604	2	5.33	2.38	0.363	29.5	2	50	4	4	2	27.45	764	0.113	8709.53	2	15
17877	2	9.28	5.4	0.597	29.5	1	79	3	4	2	24.85	989	0.016	6470.18	1	19
35324	2	5.38	6.41	0.416	29.5	1	76	3	3	2	32.79	672	184	12849.5	2	44
48277	2	8.53	6.66	1.132	29.5	1	67	4	2	2	34.74	1486	0.061	2033.63	1	71
45477	2	8.48	3.95	0.821	29.6	1	56	2	2	1	43.02	484	0.024	8007.07	1	69
29191	2	19.56	13.26	1.389	29.7	1	61	3	2	2	23.7	1245	180	4211.13	2	34
10720	2	3.53	0.93	0.24	29.8	1	67	3	3	2	34.5	822	380	10275.9	1	19
34477	2	12.49	10.97	0.728	29.8	2	70	1	5	2	26.44	989	0.073	1241.5	1	48
42795	2	5.17	2.24	0.398	29.8	2	76	4	3	1	24.51	612		2952.54	1	59
22253	2	19.78	4.63	1.004	29.9	1	78	3	4	2	33.64	1522	0.034	12913.8	1	33
22254	2	3.27	1.62	0.188	30	2	58	3	1	1	29.02	391	4.95	18979.4	2	34
21391	2	13.7	4.69	1.258	30.1	1	77	1	1	2	29.72	1246	0.38	1102.51	1	34
51394	2	5.16	4.94	0.874	30.2	1	61	3	2	2	33.35	1035	0.073	12378.1	2	59
20796	2	11.16	4.44	0.555	30.3	2	74	4	3	1	29.25	888	0.071	1575.53	1	27
27700	2	5.34	1.86	0.578	30.3	2	72	3	3	2	24.87	542	156	6631.71	2	30
31114	2	9.5	7.87	1.504	30.3	2	55	3	2	2	21.28	1498	0.218	23757.5	2	31
31274	2	5.98	4.67	0.859	30.3	1	56	3	3	2		1479	258	38051	1	53
35564	2	5.44	5.74	0.335	30.3	2	66	3	2	2	33.15	845	284	43782.2	1	50
24739	2	11.68	4.19	0.531	30.4	1	71	3	5	2	29.28	1431	0.086	7652.84	1	41
42444	2	5.37	5.66	0.365	30.4	2	68	3	3	2	26.37	1100	0.011	11458.6	1	60
51417	2	4.78	2.43	0.841	30.4	2	80	3	2	1	36.57	961		9137.64	1	65
16355	2	3.71	3.45	0.33	30.5	2	72	1	1	2	30.92	802	0.019	1340.51	1	28
12023	2	32.23	4.17	1.253	30.6	2	65	2	5	2	22.36	1656	0.09	8007.87	1	23
26726	2	6.05	4.1	0.322	30.6	2	68	3	3	2	21.27	1155	0.11	9769.44	2	31
26806	2	12.14	5.74	0.6	30.6	2	71	3	1	2	23.49	762	0.015	13657.5	1	30
29052	2	8.58	7.35	0.527	30.6	2	65	1	1	2	32.9	922		656.67	1	34
48098	2	10.67	4.58	0.47	30.6	2	80	1		2	24.08	1119	0.02	2781.34	2	69
14694	2	17.88	5.65	0.715	30.7	1	75	3	4	2	25.63	1270	0.011	8526.58	1	17
45425	2	6.3	4.72	0.574	30.7	2	77	4	3	2	29.42	758	0.022	3155.2	1	68
45939	1	5.08	4.61	0.619	30.7	2	80	3	4	2	29.93	1648	0.011	9657.22	2	60
22822	2	4.5	3.65	0.276	30.8	2	72	1	2	2	28.15	660	281	2782.82	1	34
27064	2	4.62	3.93	0.548	30.8	2	63	4	5	2	36.89	971	0.05	5986.63	2	39
28757	2	8.8	9.91	1.085	30.8	1	56	3	5	2	36.77	806	0.011	18553	1	38
31663	2	7.82	6.05	0.544	30.8	1	76	3	3	2	30.27	1453	0.025	4089.88	2	53
33796	1	3.84	6.9	0.827	30.8	2	81	3	4	2	27.99	1051	0.022	11222.9	1	46
43115	1	8.31	9.45	0.817	30.8	2	80	3	5	2	23.18	825	0.025	7321.24	1	63
49489	2	4.53	2.89	0.626	30.8	2	55	3	3	2	29.28	800	0.042	68228.4	2	63
43526	2	4.92	2.75	0.242	30.9	1	72	2	2	2	21.58	852	0.026	2331.92	1	72
15300	1	4.96	2.73	0.398	31.1	2	85	3	3	2	20.12	723	0.035	7589.51	1	27
20657	1	7.08	3.96	0.629	31.1	2	72	3	3	2		1250	185	12832.8	2	14
26047	2	4.95	2.91	0.416	31.1	1	58	3	1	2	20.97	913	0.011	7967.62	2	34
28500	1	5.12	4.46	0.341	31.1	2	75	3	3	2	43.5	658	0.341	11352.3	2	32
11485	2	7.41	2.74	0.793	31.2	2	66	3	1	2	24.01	934	220	15319.4	2	20
11789	1	10.85	3.16	0.634	31.2	2	79	3	2	2	23.4	1039	0.024	14431.5	2	19
18811	2	9.01	4.9	0.83	31.2	2	82	3	1	1	29.64	979	0.018	6472.76	2	21
45099	1	3.38	2.28	0.576	31.2	2	70	4	3	2	35.52	366	0.257	2906.95	1	59
14347	1	11.98	6.06	1.026	31.3	2	62	4	2	2	24.52	1352	570	5271.71	1	25
39181	1	6.65	3.31	0.559	31.3	2	81	3	3	2	21.47	1060	0.011	12076.9	2	53
47771	2	10.58	8.6	0.637	31.3	2	79	3	2	2	22.71	1256	0.011	9569.64	2	60
49122	1	4.54	6	0.396	31.3	2	80	4	2	2	14.86	758		5237.08	2	68
17488	1	5.33	4.1	0.368	31.4	1	82	4	1	2	27.55	700	148	1385.05	1	19
32629	2	5.2	4.8	0.468	31.4	2	71	3	3	2	22.01	703	0.011	9679.54	2	47
25161	1	4.46	4.31	0.667	31.5	2	68	3	1	2	30.97	684	0.011	15760.1	1	29
46819	2	5.61	3.37	0.439	31.5	2	58	1	1	1	41.17	875	0.021	2328.39	1	66
16529	2	4.92	3.12	0.504	31.7	2	76	3	3	2	25.36	929	0.011	18783.2	2	19
18189	2	3.41	5.43	0.513	31.7	1	66	4	1	2	17.65	1167	449	2041.72	1	21
42578	2	3.71	2.44	0.495	31.7	2	69	4	1	1	31.84	465	0.011	3350.82	1	62
18182	2	3.69	3.02	0.542	31.8	2	64	3	4	1	25.09	1066	0.059	21463.6	2	14
20754	2	6.98	3.55	0.783	31.8	2	74	4	2	2	33.33	920	799	3455.37	1	25
30766	2	3.77	2.3	0.657	31.8	2	70	3	1	2	36.96	782	0.021	11529.6	1	30
32042	2	11.55	7.96	1.28	31.8	2	66	4	2	2	23.47	1243	0.011	4310.96	2	52
48974	2	2.69	2.86	0.508	31.8	2	57	4	3	1	34.23	602	0.011	4079.04	2	60
12376	2	6.35	5.12	0.497	31.9	2	61	1	1	1	25.83	634	0.011	612.885	1	22
25099	2	4.33	6.48	0.503	31.9	1	64	1	1	2	36.72	868	0.011	660.431	1	40
25489	2	7.57	4.47	0.881	32	2	74	1	1	1	29.22	1225	0.015	1016.59	2	42
35216	1	5.1	5.41	0.377	32	2	71	3	2	1	27.13	850	0.011	10094.1	2	44
17930	2	14.38	5.38	0.587	32.1	1	77	3	5	2	30.57	1090	0.027	11142.4	1	19
27294	2	9.45	6.71	0.961	32.1	2	66	3	4	1	42.07	1861	0.096	14446	2	34
29639	2	5.5	4.66	0.641	32.1	2	60	4	2	2	34.89	1104	0.136	2371.24	2	32
26343	1	11.53	5.95	0.486	32.2	2	79	4	2	1	27.91	752	0.032	4258.72	1	35
33337	2	3.57	2.75	0.305	32.3	2	68	4	1	1	37.14	472	0.545	1433.76	2	49
36732	1	5.78	5.92	0.919	32.3	2	72	3	4	2	20.82	1060	0.011	13952.7	2	52
16758	2	5.89	3.88	0.858	32.4	2	65	1	1	2	36.01	992	0.683	515.234	1	15
28948	2	7.07	4.09	0.541	32.4	2	58	1	1	2	31.41	1200	0.021	7983.82	2	40
30297	2	4.31	2.69	0.551	32.4	1	64	3	4	2	34.01	788	0.099	20472.1	1	38
30829	2	6.02	5.66	0.553	32.4	1	64	3	1	2	29.46	735	0.016	19030.4	2	33
48561	1	4.19	2.61	0.306	32.4	2	78	3	2	1	40.24	415	0.082	11189.9	2	59
49723	1	5.2	2.77	0.448	32.4	1	70	3	5	1		669	0.088	10920.1	1	67
33871	2	6.96	3.79	0.483	32.5	2	62	4	2	2	31.75	1205	0.249	2223.49	2	45
46203	1	6.4	4.86	1.13	32.5	2	64	4	4	1	29.15	1065	283	2424.62	2	68
47191	2	8.43	4.12	0.285	32.5	1	66	3	1	2	31.76	1528	3.47	5078.9	1	67
11672	2	3.57	4.31	0.467	32.6	2	71	3	2	1	33.99	506	0.011	8867.86	2	19
22569	2	11.44	6.33	1	32.6	1	83	3	4	2	26.42	815	0.011	3887.25	2	30
22845	1	6.29	5.95	0.832	32.6	2	79	3	5	2	25.43	1378	0.133	5717.41	2	43
36237	1	12.24	2.57	0.354	32.6	1	82	3	1	2		840	0.031	3856.35	2	46
11751	2	4.45	4.67	0.66	32.7	1	72	1	1	2	26.95	1427	0.011	890.053	1	15
12651	2	21.99	18.45	0.531	32.7	2	60	5	3	1	23.76	824	0.011	7038.18	1	16
17129	2	3.58	3.25	0.462	32.7	1	76	3	4	2	26.96	713	0.011	5486.48	1	17
18359	2	8.81	6.25	0.995	32.7	2	61	3	5	2	25.2	1117	0.072	18426.6	1	19
40658	2	21.33	7.27	1.135	32.7	2	69	3	4	2	20.69	1471	0.011	12308.4	1	55
14981	2	4.03	3.72	0.435	32.8	2	66	4	2	2	35.07	747		1985.82	1	16
23914	1	5.15	3.03	0.479	32.8	2	81	3	2	2	29.06	921	0.192	5393.79	2	34
30141	2	5.6	4.08	0.613	32.8	2	73	3	5	2	20.38	890	0.011	11065.1	1	35
36036	2	10.14	8.09	0.7	32.8	2	55	1	2	2	31.45	1006	0.469	2065.06	1	55
44531	1	2.24	2.83	0.447	32.8	1	79	4	1	2	30.03	536		6103.89	2	66
51411	1	5.11	3.29	0.506	32.8	2	80	3	3	2	31.29	766	0.023	13413.5	1	63
13751	2	5.9	5.75	0.641	32.9	2	71	1	4	1	36.49	562	6.99	1868.33	1	17
15156	2	10.34	5.38	0.837	32.9	2	83	3	1	2	28.38	1102	888	7815.26	1	27
43244	2	9.44	6.08	0.281	32.9	2	77	4	1	2	30.56	744		2786.41	2	67
44295	2	13.44	8.46	0.881	32.9	2	65	3	1	1	28.19	1442	0.02	14145.8	1	67
47086	2	3.55	4.42	0.382	32.9	1	80	4	3	2	34.94	601	0.019	2256.05	1	65
50303	2	13.27	12.08	0.809	32.9	2	65	3	3	2	20.74	1017	0.011	5439.23	1	60
51124	2	5.49	7.97	0.754	32.9	1	63	1	1	2	29.76	1250	0.021	1901.56	1	66
51473	2	8.12	2.67	0.448	32.9	2	75	3	2	2	29.56	1108	3.32	11074.2	2	59
13672	2	5.12	5.73	0.463	33	1	58	3	4	2	32.53	1381	0.035	8994.78	1	21
24334	1	24.52	19.34	0.932	33	2	79	4	5	1	31.42	1182	0.042	7228.21	1	41
31334	2	6.14	3.9	0.48	33	2	55	4	5	2	43	1520	0.011	7563.86	1	56
20907	2	8.32	4.7	0.779	33.2	2	67	3	3	2	44.02	896	0.048	21331.3	1	27
38739	2	6.49	7.07	1.476	33.2	2	55	3	5	2	30.16	809	0.187	27262.9	2	44
44916	2	4.45	3.01	0.471	33.2	2	71	4	2	2	46.01	652	0.979	5566.99	2	68
13471	1	15.87	5.4	0.543	33.3	2	76	3	4	1	28.94	868	0.011	16865.1	2	19
13875	1	8.28	6.36	0.867	33.3	2	85	3	3	2		1248	0.018	3784.7	2	25
14285	2	6.14	3.97	0.73	33.3	2	60	1	1	2	29.75	904	0.03	1319.75	2	25
17621	2	9.28	5.6	0.653	33.3	1	62	2	1	2	20.69	955	434	2689.58	2	14
22994	2	6.46	6.22	0.911	33.3	1	68	3	3	2	29.83	2244	60.6	9411.98	1	38
23439	2	4.8	3.1	0.537	33.3	2	69	2	1	1	22.25	804	0.024	15992.5	1	43
35551	1	15.79	3.63	0.35	33.3	2	80	3	2	2	34.6	831	545	4654.07	1	52
41076	2	11.08	2.8	0.506	33.3	2	85	4	3	1	30.9	1026	0.148	7300.22	2	49
23998	2	10.37	7.95	0.583	33.4	2	85	3	3	2	26.23	1213	0.02	7519.07	1	40
35221	2	8.31	4.69	0.709	33.4	2	61	1	1	1	27.7	907	0.035	8600.77	2	51
40249	2	5.07	5.05	0.856	33.5	2	58	3	5	2	28.15	965	0.011	17834	1	55
43761	2	5.36	4.26	0.723	33.5	1	60	4	2	2	27.02	1099	0.011	3245.22	1	72
45553	1	10.88	9.92	0.702	33.5	2	68	3	4	2	22.75	1409	0.02	7364.67	2	66
50528	1	12.65	4.53	0.54	33.5	2	80	3	3	2	23.82	1009	0.011	7859.52	2	62
18138	2	16.62	6.85	1.015	33.6	1	85	3	4	2	24.96	1518	0.011	2464.91	2	19
29338	2	1.28	1.1	0.199	33.6	1	53	4	2	2	22.35	671	70.2	3509.8	1	36
17758	1	15.71	14.56	0.596	33.7	2	85	4	3	2	23.96	1133	0.035	3635.85	1	18
42026	2	2.66	3.68	0.561	33.7	1	71	3	1	2	35.84	596	0.134	7764.96	1	62
50152	2	4.65	5.37	0.652	33.7	2	68	4	4	1	20.31	1222		2690.62	2	67
23375	1	11.15	5.53	1.182	33.8	1	75	3	3	2	31.45	1632	0.011	10548.4	1	35
24475	2	3.41	2.73	0.4	33.8	1	80	3	3	2	22.68	645	31.8	8469.97	2	42
42102	2	23.3	2.8	0.539	33.8	2	58	4	2	2	33.63	1153		3713.65	2	67
47809	2	6.08	7.89	0.632	33.8	2	63	4	4	1	36.98	1141	1.11	3853.75	2	64
48070	2	4.43	3.87	0.686	33.8	2	67	1	2	1	24.91	688	0.011	3271.1	2	72
11572	1	5.47	5.83	0.639	33.9	2	85	1	1	1	27.45	966	0.011	1302.62	2	15
23519	2	6.88	8.78	1.056	33.9	1	67	3	4	2	32.34	1161	0.063	7277.59	1	29
32099	2	6.3	5.66	1.34	33.9	1	65	4	2	2	36.47	1682	387	2391.79	1	50
50265	1	6.16	3.79	0.653	33.9	2	71	5	2	2	30.32	843		5551.04	2	69
45059	2	14.15	3.4	0.335	34	1	77	2	2	2	19.3	1152	0.256	1616.75	2	60
50340	1	6.43	6.81	0.565	34	2	68	5	1	1	21.18	992	285	21626.8	2	71
30078	1	5.29	2.74	0.918	34.1	2	82	3	5	2	33.24	807	0.011	6122.4	2	34
47821	2	6.94	9.79	0.438	34.1	2	80	2	1	1	30.82	1204	0.011	3143.36	1	62
48740	2	3.28	3.2	0.202	34.1	2	64	4	2	2	26.66	672	242	2887.31	1	59
30370	2	5.73	3.18	0.491	34.2	2	78	1	2	2	35.7	648	0.011	1220.15	1	40
33331	2	5.25	5.42	0.666	34.2	2	56	4	2	2	38.45	1526	185	11541	1	56
38060	2	4.82	7.13	0.607	34.2	2	69	4	2	1	27.63	1205	0.244	3734.14	1	53
14939	2	6.66	5.87	0.917	34.3	2	60	3	2	2	31.2	1479	198	15963.5	1	23
28019	2	8.85	5.82	0.559	34.3	2	78	3	3	2	22.27	648	0.011	7280.85	2	30
35617	2	11.79	3.4	0.741	34.3	2	81	1	3	2	32.26	865	0.04	8906.48	1	57
11420	2	5.07	2.84	0.54	34.4	2	50	4	5	2	32.33	1660	0.076	3163.38	1	14
14967	1	6.87	3.01	0.445	34.4	2	82	4	1	2	20.3	874	459	2214.05	1	16
44069	1	9.35	5.86	0.473	34.4	2	76	4	3	2	32.29	738	0.016	5481.45	1	68
25575	2	2.34	3.27	0.613	34.5	2	57	3	4	2	24.12	580	0.011	19442	2	32
41127	2	7.18	9.29	0.668	34.5	2	70	4	2	1	31.44	783	249	9024.34	2	53
45119	1	10.4	5.35	0.54	34.5	2	72	3	4	2	23.67	1038	0.017	7857.14	1	60
51282	1	8.23	10.71	0.509	34.5	1	69	2	1	1	35.64	771	0.236	1463.48	2	61
21281	2	5.54	4.13	0.627	34.6	2	64	1	1	1	30.56	742	0.027	519.102	2	40
27262	2	18.3	17.58	2.428	34.6	2	55	4	3	2	28.75	1843	0.037	11222.6	1	30
28907	2	7.87	4.27	0.946	34.6	1	81	3	5	2	27.69	1404	0.016	4603.53	1	39
43498	2	10.27	3.79	5.9	34.6	1	78	2	1	2	27.46	568	0.021	3339.34	1	60
44746	2	7.37	3.88	0.669	34.6	2	53	4	3	2	31.79	1338		4387.92	1	73
45968	2	9.43	3.88	0.626	34.7	2	69	4	3	1	37.82	769	0.074	2518.32	1	59
22346	1	5.04	3.5	0.518	34.8	2	85	3	5	2	27.79	752	0.011	4863.12	2	39
39538	2	11.82	3.32	0.534	34.8	2	60	3	5	2	42.34	687	0.011	21775	2	44
12708	2	6.49	2.62	0.808	34.9	2	85	3	2	2	26.87	1147	0.035	7567.2	2	19
17734	2	22.66	16.46	0.731	34.9	2	64	3	2	2	36.76	1290	0.864	13272.7	1	14
25354	1	11.3	5.61	0.846	34.9	1	80	3	5	2	28.04	1291	0.037	5363.53	2	37
16285	1	20.6	13.62	1.842	35	2	80	3	3	2	27.94	2440	0.022	6626.76	1	23
30449	1	11.84	7.14	1.166	35	2	76	4	4	2	35.46	1096	0.043	6107.07	2	41
11838	1	4.06	6.83	0.474	35.1	2	65	3	3	2	29.33	941	0.011	7929.35	1	19
16125	2	4.85	3	0.492	35.1	2	82	3	3	2	26.33	1018	0.011	4778.75	1	17
32666	1	6.7	2.34	0.541	35.1	1	85	3	3	2	27.27	1107	0.025	7029.5	2	49
47636	2	5.22	3.92	0.393	35.1	1	74	1	1	1	34.51	688	0.03	1651.86	1	60
49815	2	9.6	2.42	0.442	35.1	2	78	3	1	2	31.6	968	0.016	4638.93	2	62
11797	2	3.65	5.56	1.022	35.2	1	64	1	2	2	26.8	1401	0.078	467.296	2	15
21185	2	28.11	23.65	0.491	35.2	1	61	3	5	2	29.26	827	0.023	8069.95	2	30
25135	2	5	3.37	1.017	35.2	1	68	1	1	1	33.34	1388	0.011	2050.56	2	38
20531	1	5.49	5.32	0.49	35.4	2	75	2	1	2	21.76	878	0.186	13340.3	2	28
23792	1	4.58	5.81	0.397	35.4	2	76	1	1	1	31.89	877	0.106	1157.05	1	38
24892	1	7.43	4.91	1.832	35.4	1	70	1	1	1	28.7	1610	0.011	942.732	2	38
32952	1	7.15	5.76	0.821	35.4	2	76	3	5	2	13.36	1564	0.011	14142.4	2	52
11233	1	6.85	3.35	0.348	35.5	2	81	3	3	2		668		4163.96	2	27
50275	2	9.35	8.25	0.486	35.5	2	62	5	2	1	27.5	1118	0.016	4468.7	1	73
27937	2	12.21	10.79	0.598	35.6	2	55	3	4	2	21.83	993	221	19442	2	32
49040	2	8.32	6.72	0.935	35.6	1	62	3	5	2	32.83	1649	0.011	7444.19	2	69
18200	2	5.1	3.37	0.312	35.7	1	78	4	1	2		948	157	2413.88	1	27
18741	2	9.66	7.25	3.308	35.7	1	80	3	1	2	28.41	1648	0.027	3470.83	2	23
23188	2	3.86	3.13	0.412	35.7	2	56	3	3	2	17.97	788	151	33453.5	2	32
41021	2	3.15	4.11	0.431	35.7	1	66	2	2	2	28.19	540	0.057	7606.86	1	58
27834	2	8.67	5.16	0.952	35.8	2	70	1	3	2	22.74	1282	0.066	782.544	1	34
13519	2	9.88	4.81	1.296	35.9	2	63	5	5	2	33.9	1285	0.011	2638.3	2	21
10323	1	6.26	2.2	0.751	36	2	74	4	1	1	30.74	727	0.662	12032.2	1	24
14999	2	7.38	2.45	0.792	36	2	60	3	3	1	40.39	876	287	8223.12	1	20
21173	2	13.45	9.65	0.664	36	2	69	4	1	1	25.32	936	0.011	1716.99	1	35
22719	2	4.14	3.44	0.356	36	1	69	5	4	2	21.48	1779	381	3004.16	1	37
23457	1	5.34	3.21	0.455	36	2	72	1	1	1	26.34	825	0.011	1379.39	2	38
26032	1	7.66	6.53	1.174	36	2	85	3	5	2	31.57	1355	0.119	9043.94	2	32
26511	2	5.87	5.54	0.794	36	2	81	3	2	1		947	0.039	5765.58	1	29
12442	2	7.83	7.46	0.583	36.1	2	74	1	1	2	35.9	892	0.054	632.373	1	28
46322	2	14.63	7.31	1.274	36.1	2	80	3	5	2	20.65	1643	0.011	9829.72	1	70
46940	1	3.83	3.41	0.398	36.1	1	62	1	1	1	26.33	724	0.011	2729.11	2	61
50780	2	5.14	5.08	0.924	36.1	1	59	4	3	2	30.83	1652	0.389	3655.38	1	65
51457	1	4.6	2.65	0.391	36.1	2	69	1	1	1	33.63	374		1582.11	1	65
42041	2	9.94	4.36	1.026	36.2	1	80	3	1	2	22.62	761	0.069	2813.71	2	70
44508	2	2.45	3.3	0.332	36.2	2	80	4	1	1	47	537	0.152	4554.59	1	64
15322	2	9.66	6.74	1.253	36.3	1	76	3	4	2	32.27	1608	43.5	4964.94	2	26
27386	2	3.84	2.46	0.322	36.3	2	64	1	3	2	29.64	749	376	402.177	2	40
34167	1	10.05	5.85	0.944	36.3	2	81	3	1	2	29.01	1111	0.038	13598	2	49
44661	2	14.38	2.51	0.616	36.3	2	60	3	4	2	34.2	689	0.021	7665.04	2	71
47851	1	26.11	22.02	1.254	36.3	2	80	3	1	1	25.75	1332	0.176	13483.8	2	60
48668	2	5.51	7.33	0.506	36.3	2	80	3	3	2	27.31	845	0.017	6195.22	1	61
43296	2	22.82	7.48	0.974	36.4	2	65	3	3	2	21.4	1404	1.51	17445.6	1	64
12610	1	5.69	7.93	0.401	36.6	2	70	3	2	2	29.95	806	0.011	7318.28	2	19
24932	1	7.54	3.13	0.447	36.6	2	85	3	1	2	23.56	708	0.137	4122.03	2	33
26530	1	8.16	9.35	0.62	36.6	1	85	2	1	2	21.42	824	0.025	4300.83	2	35
29090	2	5.32	3.15	0.522	36.6	2	60	4	3	2	30.84	804	0.028	5733.44	1	42
11826	2	4.68	4.18	0.477	36.7	2	69	4	2	2	35.95	1208	403	1881.16	1	27
40211	2	8.44	5.37	0.782	36.7	2	62	3	2	2	41.21	1886	404	12739	2	58
51227	2	7.42	5.44	1.312	36.7	2	56	2	2	2	29.44	1008	0.046	1297.08	2	69
32540	2	6.18	7.72	0.734	36.8	2	60	4	2	2	33.84	1048	0.088	4861.78	2	51
38352	2	11.8	5.24	0.835	36.8	2	73	3	3	1	30.45	968	0.072	23870	1	49
39785	1	4.61	3.56	0.443	36.8	2	71	3	3	2	25.07	1178	293	22075.6	1	48
48641	2	10.53	3.19	0.568	36.8	1	80	3	1	2	27.86	1086	0.059	2479.61	2	59
18718	2	17.02	8	1.359	36.9	1	76	4	4	2	27.47	1723	0.026	9005.52	2	25
13048	2	14.7	6.53	0.651	37	2	83	3	4	2	18.02	1195	92.5	6268.18	2	21
36100	2	6.98	4.82	0.235	37	2	80	3	3	2	29.6	523	0.119	9519.62	2	47
39853	2	7.71	3.89	0.634	37.1	2	63	3	4	2	31.05	1353	0.032	12073.4	2	50
43301	2	9.05	8.21	0.784	37.1	2	66	1	1	1	32	1374	0.011	937.165	1	65
15902	2	10.79	6.58	1.58	37.2	2	57	3	5	2	24.59	951	0.039	13114.8	2	21
18071	1	6.91	2.95	0.529	37.2	2	83	3	1	2	24.81	449	0.035	3634.91	1	26
26878	2	26.69	3.09	0.769	37.2	1	76	3	5	2	29.41	1786	0.011	5488.26	1	34
42340	2	4.45	6.98	0.313	37.2	2	60	1	1	2	32.35	702	0.015	1824.46	1	66
45801	2	4.42	5.59	0.621	37.2	2	80	2	1	2	27.07	633		1970.87	1	62
45992	2	7.23	4.13	0.744	37.2	2	75	3	1	2	41.91	994	0.243	7305.51	2	59
49067	2	8.06	5.96	1.004	37.2	2	60	4	2	1	33.81	1238	0.071	1889.49	2	64
30597	2	6.63	5.69	0.59	37.3	1	65	4	2	2	30.2	445	144	3377.12	2	42
32140	2	10.04	3.55	1.085	37.3	2	69	4	4	2	33.23	1271	0.095	2392.58	1	51
34427	2	11.45	2.54	0.682	37.3	2	74	1	1	2	26.86	841	0.011	6118.72	1	58
38285	1	10.78	7.57	0.802	37.3	2	81	3	4	2	25.16	886	0.042	10380.2	1	50
23744	2	10.09	2.66	0.527	37.4	1	85	4	1	2	21.02	1425	0.137	2829.42	1	35
24917	2	5.37	5.19	0.64	37.4	2	83	3	4	2	30.14	649	0.016	3989.05	1	40
25875	1	7.58	3.09	0.649	37.4	2	69	3	2	1	40.77	1364	550	5020.08	2	37
41772	2	9.76	5.06	0.714	37.4	1	69	2	2	2	25.95	820	0.068	3799.45	2	61
19743	2	7.61	7.85	0.949	37.5	2	56	1	3	2	25.38	1055	233	2039.64	2	27
31765	2	11.4	6.19	1.365	37.5	1	70	3	4	2	35.24	2636	1.07	8854.76	2	56
47394	1	12.94	3.03	0.568	37.5	1	80	3	1	2	22.89	962	0.328	2606.18	1	67
18361	1	10.9	5.98	0.798	37.6	2	85	3	1	2		1357	0.046	6744.52	1	23
22062	2	2.58	2.56	0.232	37.6	1	57	3	2	2	23.96	925	357	7967.62	2	34
24180	1	6.12	5.73	0.589	37.6	1	60	3	3	2	22.5	1975	326	25156.2	2	42
25864	1	5.93	5.42	0.954	37.6	2	81	3	2	2	27.49	1049	0.011	5044.86	2	35
29370	2	23.17	19.02	0.509	37.6	1	75	3	5	2	27.55	915	31.2	4821.84	1	41
41694	2	11.86	9.25	0.939	37.6	2	60	2	4	2	26.06	1891	0.061	2216.69	2	61
45078	1	5.49	5.27	0.499	37.6	1	78	3	4	2	24.38	894	0.038	14065.5	2	59
47277	1	4.54	3.48	0.357	37.6	1	75	3	1	2	29.37	1179	290	3520.58	2	60
24662	2	10.29	7.99	0.733	37.7	2	63	3	2	2	32.36	1991	0.027	8934.63	2	37
39796	2	7.15	6.52	0.292	37.7	2	61	3	2	2	36.48	1090	418	10475.7	2	49
14137	2	5.88	6.28	0.464	37.8	1	85	3	5	2	25.33	634	0.021	4025.75	2	25
17694	2	9.79	4.25	0.828	37.8	2	64	2	4	2	30.53	798	0.297	17974.4	1	24
19207	2	4.08	1.92	0.388	37.8	1	71	4	3	2	29.37	1726	0.725	3379.51	1	24
20793	2	6.75	4.41	0.971	37.8	1	85	3	1	1		1437		4097.36	1	23
21562	2	6.41	2.99	0.323	37.8	2	66	2	1	2	31.78	921	0.016	4347.27	1	43
23308	2	7.08	6.56	1.241	37.8	1	68	1	3	2	27.32	1389	0.011	571.662	1	34
33001	2	3.52	3.49	0.305	37.8	1	82	3	3	1	21.18	629	159	2965.45	1	45
43550	2	4.68	5.51	0.365	37.8	1	74	4	4	2	40.41	1335	0.677	3794.47	2	66
12256	2	8.51	6.55	1.319	37.9	2	71	3	3	2	30.79	1182	0.011	11103.3	1	22
22454	1	6.08	4.95	0.61	37.9	2	85	3	3	2	18.44	1370	0.011	9266.57	1	35
22573	1	9.5	6.6	1.034	37.9	2	85	3	4	2	26.03	1718	0.017	7115	1	29
28986	2	6.11	6.76	0.793	37.9	2	65	3	3	2	22.34	1156	195	26864.8	1	29
42656	2	18.47	6.56	0.751	37.9	2	55	1	3	2	35.94	1214	0.024	3646.9	2	71
42866	1	8.06	10.4	0.991	37.9	2	80	3	2	2	38.47	1591	0.097	8053.32	2	63
43036	2	5.96	4.39	0.728	37.9	2	56	4	4	2	64.8	945	2.34	8351.16	1	64
36197	2	5.98	7.23	0.581	38	2	60	4	2	2	26.45	863	571	4809.45	2	51
37977	2	4.42	4.37	0.32	38	1	73	2	1	2	32.92	717	0.035	1414.82	2	56
10936	2	6.91	2.32	0.778	38.1	2	77	1	3	2	30.99	1248	0.021	1663.06	1	28
15694	2	21.68	12.94	0.191	38.1	1	57	3	2	2	26.41	807	0.193	7691.29	1	21
39454	2	5.21	3.37	0.628	38.1	1	67	4	2	2	25.07	930	363	4154.72	1	48
45174	1	9.48	4.59	1.031	38.1	2	74	3	3	2	18.81	2000	0.084	4667.73	2	59
12632	1	10.85	8.91	0.549	38.2	2	75	3	5	2	22.71	1079	0.011	8115.39	2	20
13125	2	4.97	7.24	0.271	38.2	2	50	4	1	2	27.02	914		3231.12	2	28
18557	2	5.83	2.79	0.507	38.2	2	74	3	2	2	31.65	925	0.147	6216.23	1	14
26181	2	16.17	7.32	1.427	38.3	2	85	1	1	2	27.26	1363		1011.42	1	39
30771	2	21.45	23.68	0.743	38.3	2	85	3	1	2	23.47	1252	0.011	6654.53	1	33
40700	2	13.12	4.82	0.714	38.3	2	51	4	1	2	45.9	1677	0.021	7660.27	1	49
41595	2	16.22	7.58	1.441	38.3	2	76	3	2	2	18.49	1503	288	8275.46	1	60
15840	2	11.16	10.23	1.125	38.4	2	71	1	5	2	23.17	870	191	1349.35	2	27
16458	1	16.55	4.51	0.712	38.4	2	74	3	3	2	17.71	1334	0.018	5965.44	1	23
36747	2	3.96	1.11	0.264	38.4	2	64	1	1	2	33.4	505	35.9	4347.46	1	47
41570	2	4.85	3.53	0.567	38.4	1	55	3	1	2	20.62	859	297	6412.7	2	59
47015	1	4.9	4.34	0.24	38.4	2	80	4	2	1	27.23	653	0.132	3567.75	2	67
51234	2	6.2	5.64	0.733	38.4	2	65	2	1	2	22.24	961	0.011	953.464	1	73
21257	2	7.03	7.75	0.439	38.5	2	67	4	1	2	37.03	1377	0.231	5440.87	1	33
21309	1	7.56	4.08	0.474	38.5	2	64	3	2	2	26.97	1248	338	15273.6	2	34
21499	2	19.28	11.52	1.823	38.5	1	62	1	1	2	30.08	1487	0.011	1047.29	2	40
24043	2	30.07	7.64	0.829	38.5	1	79	3	2	2	28.4	1439	0.011	3012.26	2	37
24230	2	10.46	15.48	0.766	38.5	2	82	3	4	2	29.41	478	0.011	9691.83	2	39
28798	2	8.96	4.87	1.362	38.5	2	55	4	4	1	55.96	1720	0.132	11460.7	2	37
44096	2	3.96	2.47	0.378	38.5	1	64	2	1	2	24.96	678	104	1643.96	1	72
14533	2	7.39	5.29	0.513	38.6	2	67	4	3	2	30.74	1086	0.022	7524.61	2	25
16575	2	12.28	3.6	0.252	38.6	2	62	4	2	1	36.36	1006	0.864	2004.18	2	20
16899	1	6.49	4.53	0.583	38.6	2	78	4	1	1	27.18	1156	0.064	4488.33	1	27
24262	2	8.78	6.37	0.858	38.6	2	63	3	5	2	22.32	1319	0.033	12700.5	1	34
31345	1	7.1	4.43	0.982	38.6	2	67	3	2	2	26.15	1039	224	31292.9	1	46
41013	2	7.77	7.2	0.717	38.6	2	64	4	3	2	32.15	734	868	3233.63	2	50
14230	2	4.65	3.04	0.413	38.7	1	76	3	1	2	19.68	1143	237	6959.19	1	18
28011	2	8.92	4.42	0.906	38.7	2	63	4	5	2	28.03	1159	25.2	1714.73	1	42
37128	2	11.69	5.81	0.665	38.7	2	64	4	2	2	29.77	1420	0.041	2273.49	1	50
49373	2	18.86	3.55	0.674	38.7	1	58	4	2	2	22.55	1394	230	11152	2	68
51213	2	2.41	3.32	0.62	38.7	1	64	4	1	2	25.23	816	227	2849.15	1	68
22048	2	5.07	5.16	0.461	38.8	2	71	3	2	2	22.34	822	0.011	12769.8	1	37
29777	1	5.12	4.68	0.557	38.8	2	61	5	2	1	24.45	883	0.496	11966.6	1	38
44915	2	7.49	7.61	0.94	38.8	1	69	4	4	2	29.28	1125	0.038	1329	1	62
47464	2	9.93	6.6	0.822	38.8	2	80	3	4	2	23.18	1126	0.011	11373.3	2	71
50754	2	8.91	6.57	1.067	38.8	2	62	1	3	2	31.4	1657	0.018	1410.11	2	70
12485	2	17.33	8.09	1.543	38.9	1	75	4	1	1	37.13	1303	0.035	2222.34	1	27
12874	1	9.7	5.13	0.625	38.9	2	85	3	4	2	26.8	874	0.016	8361.75	2	24
23061	1	9.36	5.54	0.819	38.9	1	85	3	5	2	25.53	909	0.034	4736.54	2	36
30417	1	8.32	6.82	0.971	38.9	2	76	3	2	2	39.75	1595	0.011	7208.03	2	30
39751	2	11.51	6.72	0.763	38.9	2	75	3	3	2	30.45	1009	0.025	16946.9	1	55
44938	2	8.73	6.34	0.762	38.9	2	56	3	3	2	21.46	1701	0.027	16276.5	2	63
49711	2	4.96	3.06	0.544	38.9	1	69	4	1	2	21.9	691	1.16	1894.61	2	67
11608	2	6.76	2.89	0.39	39	2	78	4	2	2	25.14	1270	0.087	1939.81	1	14
25064	1	9.73	4.19	0.787	39	1	66	3	4	2	29.28	1371	47.4	10102.2	1	37
25068	2	4.34	2.67	0.213	39	2	69	1	1	2	24.93	657	168	633.213	1	34
15844	2	7.04	5.34	0.568	39.1	1	82	2	1	2	25.03	1146	0.032	2830.02	2	14
42172	2	7.23	4.1	0.795	39.1	2	71	4	3	1	34.31	1021	0.019	3379.25	2	67
45842	1	13.41	4.5	1.168	39.1	2	80	4	5	2	26.07	1705	422	3524.45	2	66
46477	2	9.34	6.99	0.578	39.1	1	68	3	4	1	38.18	1279	0.011	20432.3	1	61
49491	2	8.46	8.5	0.881	39.1	1	80	4	1	2	25.97	1891	0.074	2574.22	1	59
15236	2	6.58	3.9	0.672	39.2	2	72	1	1	2	22.6	1182	0.035	2550.43	1	26
24937	2	4.23	3.56	0.299	39.2	1	79	4	4	1	27.75	695	111	1867.65	2	33
38783	2	9.98	12.11	2.864	39.2	2	66	3	2	2	21.51	2321		14980	1	49
39482	1	3.38	4.15	0.323	39.2	2	75	3	3	2	20.32	1488	0.011	12707.4	2	57
13017	2	14.59	14.49	1.715	39.3	1	70	3	3	2	33.28	1205	106	6358.06	1	23
14636	2	8.13	6.37	1.127	39.3	1	67	1	1	2	24.24	1555	0.148	409.439	1	15
43916	2	11.52	6.4	0.633	39.3	2	55	3	2	2	24.31	1014	362	5262.12	2	59
10304	1	7.31	6.18	0.836	39.4	1	72	3	2	2	26.89	887	0.042	4924.81	1	23
17979	1	7.24	8.17	0.438	39.4	2	62	4	3	2	26.73	1200	0.016	4831.01	1	16
41627	2	17.87	11.58	1.129	39.4	2	80	3	3	2	24.04	1228	179	12181.6	1	68
42358	2	4.21	3.44	0.523	39.4	2	64	1	1	2	30.6	873	0.027	1385.76	2	70
20684	2	5.7	4.34	0.542	39.5	2	70	3	3	2	30.05	1024	0.011	12644.8	1	14
33806	2	4.96	3.93	0.545	39.5	2	55	3	5	2	33.08	627	0.011	13431.4	2	51
37312	2	5.86	4.66	0.925	39.5	1	76	3	4	2	31.21	841	0.011	6752.88	2	48
23978	2	6.59	3.23	0.63	39.6	2	64	1	2	2	28.14	957	0.017	2581.4	1	34
27628	2	2.58	1.63	0.208	39.6	2	56	2	1	2	22.9	668	291	8316.6	1	36
35306	2	8.49	10.73	1.005	39.6	1	78	3	2	2	24.72	1402	161	6803.06	1	45
44643	2	6.19	7.33	1.008	39.6	2	56	3	5	2	21.04	1257	0.019	13640.2	1	63
49095	2	11.38	7.55	2.167	39.6	2	66	3	4	2	36.28	1548	0.024	11490.7	2	63
11389	2	12.38	11.44	1.46	39.7	1	65	3	4	2	19.16	1690	193	10104	1	27
22095	2	6.28	7.4	0.437	39.7	1	61	1	1	2	31.95	670	74.8	2322.27	1	43
26565	2	20.01	2.88	0.361	39.7	2	50	4	3	1	39.66	762	0.188	3680.84	1	36
28610	1	13.16	12.42	0.802	39.7	2	81	3	2	2	20.81	1581	0.062	6448.55	1	42
30253	2	9.57	3.93	0.72	39.7	1	76	4	5	2	16.6	925	0.086	3923.9	1	36
33684	2	7.21	7.93	0.797	39.7	1	74	3	3	2	36.02	1217	0.053	12083.2	1	55
42927	2	14.09	10	2.366	39.7	2	61	1	4	2	24.03	2115	13.4	3445.72	1	71
46261	2	5.36	3.23	0.336	39.7	2	57	1	1	2	29.38	1612	0.06	1597.1	2	72
48828	2	4.28	3.97	0.7	39.7	2	80	4	3	1		636		5098.79	1	67
50266	1	12.95	11.12	0.715	39.7	2	76	3	2	2	29.08	1039	0.011	7433.43	2	62
14760	2	17.92	3.74	0.589	39.8	2	63	3	3	2	36.35	1270	0.04	7703.36	1	26
22024	2	6.07	3.34	0.696	39.8	2	71	3	3	2	33.04	577	0.017	14785.7	1	35
33792	2	4.81	3.7	0.406	39.8	2	73	1	1	2	24.5	862	0.025	1153.32	1	56
43474	2	6.57	2.14	0.221	39.8	2	69	3	4	2	31.14	735	0.082	9456.7	2	63
50860	1	5.75	7.75	1.107	39.8	2	62	2	1	1	31.79	728	0.011	1093.55	1	62
42941	2	10.45	4.84	0.499	39.9	2	70	3	3	2	28.34	827	0.017	7634.77	1	61
19824	2	10.29	4.52	1.038	40	1	66	3	5	2	30.23	1810	0.297	21085.6	2	24
21404	2	5.17	4.18	0.678	40	2	79	3	4	1	24.61	918	0.011	11169.1	1	31
21528	2	8.31	4.68	1.435	40	1	65	3	3	2	28.7	1780	2.37	16972	2	31
30976	2	7.38	4.37	0.892	40	1	68	4	4	2	28.45	1721	0.305	5235.23	1	30
43017	2	3.05	4.4	0.362	40	2	55	3	3	2		907	273	12616.4	2	59
48010	2	13.82	10.25	0.792	40	2	79	1	1	2	25	928	0.016	4288.2	2	70
16661	2	15.23	6.94	0.364	40.1	1	50	4	2	1	31.45	797	264	3137.41	2	20
23052	1	13.64	3.57	0.497	40.1	1	85	3	1	2	24.02	780	0.038	6364.98	2	29
30646	1	7.78	4.13	0.777	40.1	2	81	3	1	2	29.37	1021	0.011	5695.88	1	29
24455	2	8.57	3.58	0.987	40.2	1	69	1	1	2	25.41	1405	0.016	1065.34	1	34
38259	2	4.49	4.16	0.718	40.2	1	71	3	4	2	24.89	800	0.019	11699.1	2	54
41490	2	10.94	7.13	1.309	40.2	2	66	4	4	2	27.69	1411	0.045	2389.67	1	63
46756	2	3	2.79	0.41	40.2	2	77	3	3	2	28.44	627	0.028	13860.2	1	61
14910	1	7.92	3.47	0.529	40.3	2	85	3	3	2	23.56	829	0.385	3792.78	2	23
19536	2	5.88	5.7	1.124	40.3	2	59	3	5	2	36.61	1114	134	13918.4	2	23
19993	2	18.87	10.46	0.883	40.3	2	77	3	3	2	29.93	1522	0.062	11903.3	1	23
24731	2	5.78	2.72	0.501	40.3	2	56	4	4	1	27.48	788	0.011	15843.5	2	39
25723	2	3.93	4.29	0.4	40.3	2	61	3	2	2	26.88	1101	323	10430.9	2	34
29518	1	10.61	3.68	0.445	40.3	2	76	3	2	1	30.75	946	3.84	12221.6	2	33
13086	2	8.03	6.33	0.718	40.4	1	74	4	3	1	23.9	1373	0.061	967.096	1	27
14858	1	7.86	4.99	1.005	40.4	2	57	5	2	1	26.28	1207	0.011	20151.8	1	17
39970	2	7.67	7.69	0.743	40.4	2	71	4	2	2	36.26	1264	0.031	3469.99	1	51
45065	2	8.63	5.76	1.123	40.4	1	75	2	2	2	31.21	1610		1757.29	2	61
45658	1	5.71	3.86	0.502	40.4	1	57	2	1	2	29.52	1039	0.397	8153.72	2	61
21050	2	9.29	8.91	0.765	40.5	1	69	3	3	2	29.54	1317	0.155	33802.7	2	32
37722	1	9.85	3.77	0.518	40.5	2	84	3	4	2	28.08	789	0.011	7389.11	2	55
43976	2	10.4	6.71	0.796	40.5	2	60	1	2	2	33.61	1838	0.204	1905.45	2	65
45445	2	4.19	3.84	0.539	40.5	1	78	3	1	2	32.5	732	1.21	3990.84	2	59
45982	1	12.69	7.66	2.068	40.5	1	80	4	4	1	33.6	1899	0.022	2219.42	2	70
20709	2	5.4	3.52	0.441	40.6	2	73	3	4	2	35.44	841	0.011	7564.06	2	24
35549	2	6.25	4.57	0.413	40.6	2	70	1	3	2	24.38	972	0.011	2630	2	54
41796	1	16.12	4.6	0.58	40.6	2	60	4	3	1		806	0.124	3503.95	2	60
15077	2	5.09	4.83	0.709	40.7	2	64	4	5	1	34.49	1438	30.9	4831.01	1	16
35092	2	7.38	9.62	0.953	40.7	2	72	3	5	2	32.04	1343	0.011	11233.6	1	54
38337	2	7.95	7.42	1.036	40.7	1	64	1	2	2	41.87	1517	0.036	1084.28	2	58
42180	2	7.61	4.21	1.007	40.7	1	74	3	3	1	37.21	1899	0.089	8101.52	2	61
10539	2	8.4	4.74	0.581	40.8	2	73	5	1	1	24.8	937	0.035	15427.3	1	15
41879	1	6.99	9.13	1.205	40.8	2	80	3	4	1	31.63	2029	0.035	6354.8	1	60
50880	2	8.87	12.15	1.752	40.8	2	57	4	5	2	25.22	1383	0.011	4885.36	1	68
15228	2	4.81	4	0.765	40.9	2	73	3	4	1	33.98	1549	0.021	11805.1	1	22
22328	2	13.35	10.56	1.458	40.9	2	61	1	2	1	37.05	1267	1.06	823.632	2	33
41751	2	15.67	6.83	1.288	40.9	2	73	3	3	1	40.45	760	0.06	5039.42	2	59
11051	2	7.46	6	0.571	41	1	67	1	2	2	24.15	1264		2859.74	2	17
20018	2	6.3	4.84	0.87	41	2	76	3	3	2	30.94	1276	0.011	4617.68	2	23
23904	2	5.75	4.56	0.555	41	2	51	4	4	2	23.76	1292	532	17497	2	37
31278	2	9.95	7.17	1.089	41	1	65	1	1	2	26.01	1182	376	2236.49	2	54
17978	2	9.86	8.32	1.168	41.1	1	73	3	3	2	26.06	1863	0.129	3496.39	1	20
19410	2	7.87	6.86	0.777	41.1	2	70	3	4	2	22.12	1217	2.37	11033.4	2	26
25922	2	4.6	4.86	0.454	41.1	2	63	3	3	2	26.52	1372	0.011	7986.17	2	39
34461	2	3.58	1.97	0.35	41.1	2	65	2	1	2	29.83	422	0.033	8448.99	1	58
50766	2	7.55	5.44	0.998	41.1	2	56	4	4	2	19.73	1576	27.8	11485.6	1	64
12767	2	4.26	2	0.405	41.2	2	62	3	3	2	27.28	556	0.011	11319.8	2	14
17425	2	8.32	6.29	0.861	41.2	1	77	3	5	2	31.26	1333	0.024	10263.9	2	14
36795	2	12.15	4.77	0.435	41.2	2	69	4	3	2	46.82	1517	0.442	6962.91	1	47
37127	2	10.29	2.91	0.632	41.2	2	71	4	5	2	22.61	983	0.025	8291.58	2	58
39165	2	2.17	2.87	0.457	41.2	2	51	4	5	2	27.49	594	0.027	8399.81	2	45
40717	2	5.68	4.72	0.576	41.2	2	74	1	1	2	26.43	849	0.022	4064.8	2	54
43031	1	7.34	3.86	0.781	41.2	2	80	1	1	2	19.5	843	0.011	4406.28	2	70
25250	2	5.25	6.03	0.502	41.3	1	67	1	1	2	26.43	1081	0.028	492.327	1	34
40887	2	15.73	7.33	1.038	41.3	2	56	1	1	2	25.32	1936	0.015	2572.51	1	56
45746	2	5.77	5.04	0.436	41.3	2	61	4	2	2	16.64	1183	266	2427.49	2	68
23174	2	6.11	4.65	0.366	41.4	1	72	1	1	2	25.4	984	215	2806.38	1	34
27645	1	9.41	8.11	0.65	41.4	2	83	3	1	1	27.83	1269	0.031	11795.3	2	34
47572	2	11.72	9.46	1.664	41.4	2	68	3	2	2	26.06	1346	0.131	7677.47	1	71
18300	2	5.3	4.42	0.475	41.5	1	59	3	2	2	25.47	1128	0.47	9969.99	1	14
24528	1	10.2	2.45	0.272	41.5	2	84	3	3	2	22.17	715	0.086	4439.11	1	38
28283	2	5.24	3.43	0.448	41.5	1	83	3	4	2	28.71	848	0.019	2622.56	1	31
30101	1	7.53	4.44	1.03	41.5	2	80	3	4	2	25.62	1408		4590.87	2	29
31175	2	5.17	4.65	0.557	41.5	1	75	4	1	2	31.21	691	0.59	1085.4	2	45
41252	2	12.13	6.08	1.747	41.5	2	73	3	4	2	24.39	1630	0.017	7830.18	2	53
26672	2	15.32	8.41	1.112	41.6	2	74	4	3	1	33.3	1484	0.268	2517.78	2	42
36414	2	3.59	3.3	0.638	41.6	1	80	3	1	2	35.44	690	0.125	4801.16	2	46
44719	2	5.97	4.88	8.186	41.6	2	76	2	2	2	26.55	682	0.024	3439.21	1	60
49986	2	6.99	5.09	0.702	41.6	2	63	2	5	2	33	917	0.011	1773.15	1	66
11972	2	12.45	3.59	1.043	41.7	2	85	3	3	2	28.83	1593	0.436	7380.43	1	23
23500	2	5.96	6.42	0.624	41.7	2	66	1	1	2	30.85	1062	0.011	1804.96	2	40
29490	2	12.37	4.22	0.643	41.7	1	72	2	1	2	24.43	1487	0.094	6145.27	2	36
32082	2	5.23	4.34	0.498	41.7	1	60	4	3	2	22.27	854	24.5	2166.19	2	49
33093	2	14.06	13.42	1.015	41.7	1	74	3	3	1	45.74	1373	0.011	12676.2	2	46
33263	2	7.66	6.54	1.223	41.7	1	61	1	1	2	19.47	1604	429	5255.97	1	57
38651	2	5.57	5.96	0.628	41.7	1	75	1	1	2	21.42	1122	1.35	2141.94	2	58
44498	2	15.34	3.77	0.51	41.7	2	69	4	3	2	34.31	920	0.122	2882.28	2	67
18592	2	15.33	4.12	0.567	41.8	2	64	3	3	2	19.67	1177	0.021	7364.68	1	23
24723	1	4.43	6.18	0.442	41.8	1	78	1	1	2	25.2	615	0.04	1303.02	2	40
31263	1	14.03	6.42	0.586	41.8	2	78	4	1	1	31.64	778	0.019	3785.97	2	49
39797	2	7.2	7.05	1.632	41.8	2	84	3	3	2	23.56	1159	0.011	5798.02	2	46
40815	1	5.71	1.94	0.345	41.8	2	70	3	3	2	41.12	588	0.022	14083.6	2	48
44850	2	10.55	5.12	0.912	41.8	1	72	3	2	2	27.24	872	0.025	2745.39	1	65
22127	2	12.53	5.4	0.913	41.9	2	51	4	3	1	28.9	1153		5464.97	1	35
36077	2	6.79	4.18	1.162	41.9	2	72	3	3	2	27.83	541	0.025	12123.5	2	46
37749	1	13.51	9.64	0.753	41.9	2	84	3	1	1	35.89	966	0.062	15970.7	2	47
49242	2	5.11	3.14	0.407	41.9	1	62	3	3	2	26.42	1018	558	4903.28	2	72
14587	2	7.1	9.47	0.432	42	2	85	1	1	1		1141	0.03	793.771	2	17
29564	2	15.73	6.53	0.658	42	2	60	3	2	2	22.82	952	0.016	20922.1	2	33
31721	2	6.87	3.15	0.595	42	1	62	4	4	2	32.49	1870	0.024	4614.07	2	49
42206	2	5.85	9.98	0.869	42	2	56	1	4	1	31.78	870	130	2176.24	1	66
43852	2	4.9	3.7	0.625	42	2	52	4	2	1	50.47	944	920	7525.64	1	59
10243	1	15.81	4.68	0.91	42.1	2	82	3	5	2	22.72	1687	0.011	4949.04	2	17
22868	2	6.78	4.15	0.28	42.1	2	61	1	1	2	34.73	704	0.035	563.424	1	39
33566	1	17	10.09	0.721	42.1	1	82	3	2	2	31.58	1289	0.423	4970.29	2	56
35121	2	18.05	10.25	1.065	42.1	1	73	3	4	2	27.25	1374	0.011	7468.82	2	47
39405	2	6.38	5.26	0.718	42.1	2	69	3	4	2	27.74	998	0.029	52088.3	1	57
44053	1	5.49	3.59	0.694	42.1	2	80	3	3	2	25.05	1054	0.033	7135.24	1	63
51522	2	6.31	4.6	0.634	42.1	2	62	3	4	2	26.51	902	0.019	4631.18	1	60
24428	2	8.1	5.94	0.677	42.2	2	76	3	2	2	25.79	1276	1.48	8903.28	2	34
29008	2	6.31	4.39	0.748	42.2	1	79	1	1	2	24.65	1315	127	839.119	1	34
30419	2	10.58	3.79	0.842	42.2	2	75	4	4	1	28.51	1534	0.024	2212.18	1	41
33291	2	20.72	7.48	1.058	42.2	1	79	3	5	2	23.16	1863	0.011	4707.51	2	50
35756	2	16.34	7.08	0.539	42.2	2	80	3	3	2	25.7	782	0.092	4624.06	2	44
38491	1	6.77	5.52	0.642	42.2	2	85	3	3	2	22.36	1061	0.011	7207.1	1	55
45833	1	13.01	8.31	0.814	42.2	2	80	3	2	2	21.64	1479	0.202	8868.83	2	61
29893	2	5.31	3.46	0.477	42.3	1	59	1	1	2	25.95	948	0.065	2558.6	1	38
30033	2	7.99	3.41	0.913	42.3	1	73	1	4	1	26.59	908	0.011	619.128	1	34
36356	2	17.02	12.9	0.847	42.3	2	64	3	5	2	25.62	1072	0.023	25845	1	55
38602	2	6.95	6.1	0.573	42.3	2	69	4	5	2	26.16	1587	0.046	4270.42	1	51
46651	2	4.54	4.44	0.211	42.3	2	59	2	4	2		1035	0.07	2175.18	1	71
23828	2	9.2	3.87	0.905	42.4	2	70	3	4	2	26.49	1133	0.022	11047.9	2	32
30189	1	20.26	3.86	0.682	42.4	2	81	3	4	1	28.44	1091	0.274	8770.58	2	33
34674	1	5.54	3.57	0.538	42.4	2	80	3	2	2	33.91	867	0.011	4663.61	2	50
38240	2	4.5	3.66	0.39	42.4	1	75	3	3	1	26.93	698	1.01	6075.95	1	44
42295	2	12.7	8.91	1.513	42.4	2	75	4	3	2	27.52	1994		2638.28	1	64
10101	2	11.33	5.56	1.685	42.5	1	68	4	5	1	26.44	3056	268	1913.41	1	20
11130	1	10.28	9.01	0.726	42.5	1	82	3	4	2	26.71	1112	0.021	4325.55	1	19
24027	2	2.93	3.44	0.412	42.5	2	68	4	1	2	32.45	517	0.011	2202.72	2	36
41820	2	12.57	7.5	0.655	42.5	2	79	1	1	1	29.97	876	0.011	1384.55	1	70
18269	2	4.5	3.97	0.3	42.6	2	85	4	1	2	24.25	1064	0.95	1762.52	2	26
24745	2	5.43	2.9	0.533	42.6	2	55	4	5	2	18.76	867	0.011	7277.22	2	37
43995	1	9.62	5.83	0.692	42.6	2	80	3	2	1	30.54	1346	0.011	7860.7	1	69
48858	1	15.67	9.96	1.536	42.6	2	80	5	4	1	24.49	1206	0.045	7947.66	2	69
10879	1	7.41	4.52	1.031	42.7	1	81	3	4	2		1307	0.034	1989.36	1	22
35578	2	8.59	5	0.894	42.7	1	68	3	5	2	32.32	1206	434	29927.1	1	46
35609	2	7.21	3.57	0.797	42.7	2	64	3	4	2	32.07	904	444	39652.5	2	49
37031	2	2.17	3.35	0.412	42.7	2	53	4	4	2	40.55	747	219	6473.76	2	54
38978	1	5.73	3.98	0.539	42.7	2	76	1	1	2	28.08	689	0.015	1296.52	1	55
40223	2	6.7	2.87	0.497	42.7	2	57	1	1	2	59.12	1261	0.16	1901.04	2	46
48887	2	7.19	5.12	0.847	42.7	1	72	4	2	1	25.81	1087	0.023	1867.58	1	63
16424	2	8.25	6.08	1.2	42.8	2	59	3	4	2	20.6	1376		24585.4	1	17
37650	1	14	9.77	2.138	42.8	2	60	3	2	2	27.79	2215	0.042	26424	2	49
17343	2	7.28	6.15	0.917	42.9	2	72	3	3	2	24.52	1087	0.046	5536.24	1	14
21999	1	11.74	6.34	0.846	42.9	2	85	3	4	2	23.49	1095	0.105	9403.27	2	30
35315	2	7.06	5.53	1.132	42.9	2	60	3	5	2	24.67	1161	0.011	18557.5	1	54
39860	2	6.38	5.22	0.588	42.9	2	58	4	5	1	35.1	898	0.13	5279.81	1	44
47524	2	4.44	6.27	0.462	42.9	1	76	3	1	2	20.23	729	209	9998.17	2	63
49961	2	9.19	4.11	0.634	42.9	2	50	4	3	1	24.74	1431	261	4889.5	2	64
51392	2	5.86	4.92	0.721	42.9	1	64	2	3	1	36.96	1307	0.016	1773.59	1	72
15874	2	18.27	7.68	0.79	43	2	68	3	4	2	21.85	1372	0.011	18887.3	1	17
35826	2	7.66	8.17	0.694	43	1	72	1	2	2	29.46	993	0.015	4651.07	1	55
42557	1	12.07	10.69	0.772	43	2	68	3	3	1	46.97	1040	0.029	22903.8	1	61
11502	2	6.37	5.51	0.904	43.1	2	77	3	5	2	25.01	1544	0.017	12241.3	2	14
25838	2	16.58	9.04	1.006	43.1	1	78	1	5	1	22.99	1411	0.011	1795.1	2	43
26235	2	10.12	7.89	0.557	43.1	2	65	1	4	2	25.54	997	0.011	3048.64	2	38
32644	2	16.04	6.03	1.013	43.1	1	84	3	1	2	31.72	1295	0.819	2454.01	1	44
32808	2	2.73	2.57	0.513	43.1	2	76	5	4	2		513	0.049	6174.23	1	58
41642	2	10.79	8.84	2.255	43.1	2	73	3	3	2	27.16	1960	0.035	8169.64	1	63
46991	2	18.07	12.23	2.023	43.1	2	80	2	5	2	22.88	1664	0.023	5171.91	1	72
49004	2	6.38	5.78	0.905	43.1	2	72	5	5	2	21.97	871	0.011	8606.03	2	71
29521	1	13.86	3.9	0.49	43.2	1	85	4	1	2	24.05	1644	0.126	11352.9	1	42
46627	2	7.39	4.22	0.977	43.2	2	73	1	1	2	27.43	1106	0.033	2480.17	2	71
14840	2	19.18	9.96	1.453	43.3	2	73	3	3	2	29.69	1676		5845.14	2	28
23331	2	10.25	7.33	1.412	43.3	2	56	4	5	2	40.62	1608	0.011	5971.31	1	42
27349	1	12.69	3.91	0.605	43.3	2	85	4	1	1	25.8	1056	0.029	7473.84	1	42
28250	2	7.81	4.03	0.547	43.3	2	52	4	1	1	42.1	1886	150	6824.29	2	39
28435	1	6.19	5.85	0.584	43.3	1	80	1	1	2	26.07	2304	0.029	609.255	1	39
41362	2	9.06	4.3	0.73	43.3	2	84	3	3	2	30.54	1162	0.293	10958.3	1	47
33346	2	7.7	7.71	0.872	43.4	2	72	1	3	1	32.73	1278	0.023	4879.25	2	54
35798	2	7.55	5.41	0.765	43.4	1	65	3	3	2	26.08	1342	1.07	13811.8	2	46
39098	1	3.59	2.72	0.436	43.4	1	72	3	1	1	22.59	775	533	2771.84	2	49
40599	2	11.01	4.47	0.751	43.4	2	71	3	3	2	28.04	1593	0.189	28616.4	2	47
43592	2	6.14	5.17	0.618	43.4	2	69	3	3	2	27.09	933	26	15997.6	2	60
45057	2	8.18	6.07	1.208	43.4	1	79	1	5	1	28.17	1240	0.05	1216.09	2	73
23524	2	15.52	7.2	0.739	43.5	2	76	3	3	1	26.08	1311	0.011	9057.03	2	39
28772	2	7.47	5.18	0.881	43.5	2	83	3	3	2	21.18	1025	0.011	4329.35	2	30
29104	1	7.77	9.75	0.646	43.5	1	69	3	3	2	22.16	762	0.011	8828.67	1	31
40196	2	10.13	13.25	1.232	43.5	1	59	5	5	2	30.49	1761	0.011	13708	1	54
43570	2	15.65	8.54	0.816	43.5	2	70	3	3	2	29.01	1714	0.015	10668.6	2	61
13984	2	11.59	6.07	0.61	43.6	2	73	3	3	2	29.12	1118	0.22	13073.4	2	27
21910	2	19.52	10.7	0.419	43.6	1	57	3	2	2	30.94	1068	0.128	59250.5	1	31
42125	1	12.6	4.15	0.415	43.6	1	80	4	1	2	31.14	1420	0.022	2787.97	2	67
48588	2	7.35	5.79	0.367	43.6	2	66	1	1	2	23.46	1084	0.191	1025.53	1	71
48813	2	13	13.53	0.95	43.6	1	80	3	3	2	31.47	1494	0.813	2789.83	2	63
15640	2	7.54	4.08	0.661	43.7	2	70	2	1	2	28.47	963	49.1	9639.31	2	27
29800	1	9.7	5.65	1.291	43.7	1	73	3	3	1	34.05	2256	0.099	3482.71	2	34
46126	2	15.63	12.6	0.492	43.7	2	65	3	2	2	26.8	1141	193	4470.86	1	67
25768	1	10.81	4.17	1.154	43.8	2	84	3	2	2	29.69	1159	0.511	7832.55	1	42
32377	1	3.49	2.74	0.286	43.8	2	72	3	3	2	21.13	680	0.096	14633.2	2	44
34012	1	4.39	3.92	0.475	43.8	2	82	3	1	2	33.32	1057	1.39	12176.1	2	53
34849	2	9.9	6.78	0.961	43.8	2	71	4	2	2	30.27	1708	413	8341.7	2	49
39919	2	12.41	11	1.036	43.8	1	74	4	3	1	25.97	888	0.098	2073.04	2	53
40351	2	19.98	9.4	1.571	43.8	2	56	2	4	2	28.05	1595	137	14201.8	1	58
43023	2	4.68	4.45	0.601	43.8	2	61	1	3	2	31.71	1297	0.011	2164.35	1	60
45834	1	6.27	5.83	0.863	43.8	2	72	3	5	2	23.91	1277	174	12268.1	1	71
50133	2	4.03	6.67	0.559	43.8	2	76	3	2	2	27.26	1212	0.095	4286.54	1	59
20976	2	5.24	5.56	0.515	43.9	1	78	4	4	2		678		3649.55	2	18
22831	2	13.12	2.93	0.327	43.9	2	60	3	4	2	24.3	1133	0.011	17985.7	2	32
34462	1	7.11	5.31	0.974	43.9	2	85	3	5	1	23.09	1406	0.011	8444.47	2	52
35904	2	8.31	4.44	0.715	43.9	2	64	4	2	1	32.59	527		1910.68	2	52
42416	2	6.38	6.79	0.666	43.9	1	62	4	4	2	35.07	1417	0.015	2368.67	2	65
46674	2	7.08	3.86	0.749	43.9	2	69	2	1	2	31.08	755	0.011	1287.22	2	65
46950	2	5.44	3.66	0.57	43.9	2	74	2	1	1	31.25	837	0.011	1585.72	2	73
18769	2	4.2	2.07	0.371	44	2	85	4	1	2	23.86	528	284	1837.53	1	24
41908	2	7.16	6.65	1.221	44	2	55	1	1	1	33.64	1293	0.011	4608.06	1	66
48704	2	9.2	6.19	1.195	44	2	71	1	4	2	27.67	1473	0.011	1554.37	2	66
48797	1	10.02	5.15	0.985	44	1	80	2	4	1	24.97	1608	0.022	1496.95	2	69
49003	2	5.7	4.84	0.73	44	1	71	3	5	1	32.74	1086	0.042	11065	2	65
22834	2	6.74	4.43	0.565	44.1	2	63	1	4	2	24.18	808	0.011	3241.87	1	39
24420	1	7.56	5.75	0.751	44.1	1	72	3	3	2	25.77	1419	0.011	6064.28	1	31
29632	2	6.31	4.37	0.475	44.1	1	61	1	2	1	29.36	1099	0.071	531.559	2	40
32601	2	7.89	4.34	0.541	44.1	2	58	3	2	1	35.34	1125	211	8822.91	2	44
42296	1	7.41	4.65	0.627	44.1	2	80	3	3	2	21.55	1256	0.011	7842.79	2	67
20443	2	3.6	2.89	0.674	44.2	2	56	3	4	2	35.86	751	0.011	31430.9	2	19
21682	2	5.8	3.47	0.466	44.2	1	70	1	1	1	26.18	681	11.9	1620.88	1	34
25485	2	3.61	7.2	0.737	44.2	2	59	3	2	2	37.51	1059	4.38	17305.2	1	31
26729	2	5.62	3.17	0.733	44.2	2	73	3	3	2	31.4	1621	0.029	13035.8	1	37
44392	2	8.2	11.18	1.785	44.2	2	55	4	4	2	22.13	2499	1.43	4350.32	1	63
45601	1	11.54	7.71	1.536	44.2	1	80	3	4	2	28.67	2298		8403.36	1	65
13835	2	5.62	3.32	0.535	44.3	2	72	3	5	2	27.45	745	0.011	9069.01	2	22
15892	2	8.41	3.95	0.823	44.3	2	77	3	5	2	22.18	1808	151	13208.4	1	14
17733	2	7.4	3.24	0.675	44.3	1	63	1	1	2	31.19	1378	122	266.33	2	17
27359	2	19.2	17	0.807	44.3	1	58	3	2	1	19.19	1587	230	44539.2	2	34
29627	2	8.91	6.62	0.836	44.3	1	77	3	2	1	32.77	663	21.3	3103.47	1	32
30060	1	9.58	6.15	1.231	44.3	2	84	3	4	2	20.03	1415	0.011	4864.34	2	39
38598	2	5.02	4.95	0.495	44.3	2	63	1	1	1	33.35	709	0.011	3078.02	2	56
38660	2	6.17	4.55	0.77	44.3	2	84	3	2	2	24.96	858	0.025	6661.44	1	55
48005	2	26.63	5.4	0.39	44.3	2	73	3	3	1	31.14	984	0.058	12059	2	61
24140	2	14.27	9.28	1.483	44.4	2	61	4	4	1	29.27	943		2113.98	1	36
44758	2	11.65	5	0.609	44.4	2	59	2	2	1	29.5	816	0.011	4941.52	1	62
49557	2	9.22	6.86	0.769	44.4	2	72	3	3	2	28.99	974	0.121	11074.2	1	67
13069	1	12.35	4.69	0.773	44.5	1	85	3	5	1	24.99	1522	0.011	5280.8	2	25
17446	2	5.7	5.98	1.096	44.5	1	59	4	2	2	22.61	1414	0.08	7986.35	2	20
21836	2	10.09	3.86	0.689	44.5	2	80	3	2	2	19.29	1643	0.011	3488.59	2	29
32684	2	10.31	6.61	1.14	44.5	2	67	4	3	2	33.24	1752	112	1355.81	2	45
34873	2	15.88	8.73	1.71	44.5	1	73	4	1	1	22.83	1779	0.016	1511.74	2	51
39976	2	14.16	8.97	1.13	44.5	1	70	1	1	2	31.27	1493	0.069	2392.03	1	58
41375	2	4.68	5.43	0.743	44.5	2	66	4	2	1	46.83	581	185	3275.88	2	49
47754	1	20.62	8.27	1.063	44.5	2	70	4	5	2	35.19	969	0.033	2420.63	1	62
49196	2	4.42	3.53	0.361	44.5	2	71	2	1	1	34.94	829	0.02	2746.44	2	73
22837	2	10.12	5.41	0.426	44.6	2	85	3	3	2	24.52	1425	0.067	5534.74	1	38
39324	1	4.22	1.79	0.277	44.6	2	85	3	3	2	33.11	865	0.026	5354.83	1	44
40161	2	4.68	4.02	0.505	44.6	2	83	3	2	2	20.87	1016	0.057	13792.3	2	48
43261	2	5.29	4.76	0.944	44.6	1	62	4	4	1	30.14	1188	0.111	1839.24	2	63
47243	2	10.7	4.89	0.859	44.6	1	77	3	4	2	24.23	1351	0.015	12231.2	2	70
19489	1	14.8	15.6	0.321	44.7	1	85	3	3	2	22.02	640	0.011	1270.8	2	21
23235	1	5.61	3.96	0.736	44.7	2	75	1	1	2	30.59	862	0.011	1117.5	1	34
28171	2	11.22	10.4	0.497	44.7	1	82	3	3	2	22.64	997	248	2225.92	1	32
35341	1	12.85	6.15	0.688	44.7	2	81	3	5	1	20.19	1064	0.015	5669.53	1	46
36646	2	4.59	3.23	0.519	44.7	2	66	3	2	2	37.9	998	0.052	6778.56	2	49
38721	2	11.71	7.8	0.646	44.7	2	85	3	2	1	24.66	701	0.04	7435.17	1	44
38996	2	8.68	7.72	0.775	44.7	2	55	4	4	1	23.73	998	0.015	6161.15	1	52
42946	2	8.85	4.53	1.007	44.7	1	67	4	3	2	21.84	1476	0.583	3475.17	2	59
14171	2	10.43	7.65	0.68	44.8	2	58	3	3	2	24.4	1209		14771.9	1	19
21772	2	9.12	5.61	0.749	44.8	1	66	1	5	1	33.42	1311	74.9	1294.8	1	40
31151	2	9.79	6.06	1.041	44.8	2	59	4	3	1	29.51	1722	0.011	4070.38	2	53
43520	2	4.54	4.43	0.576	44.8	2	56	4	3	1	34.07	714	233	7698.74	1	64
47574	2	5.08	5.29	0.462	44.8	2	51	4	1	2	21.39	647		11802.3	1	59
20437	2	10.93	7.25	0.928	44.9	2	76	4	2	2	26.47	1535	0.035	2182.81	1	20
37134	1	13.58	5.26	0.882	44.9	2	75	3	4	2	43.17	1614	0.021	13371.4	2	47
43358	2	9.17	6.47	1.084	44.9	1	71	4	2	2	29.37	1836	0.162	2320.6	1	61
12129	2	9.38	6.11	1.371	45	1	68	1	4	1	24.97	1668	0.035	282.159	1	25
15493	2	5.19	1.54	0.335	45	1	66	3	3	2	23.04	520	0.02	6664.74	1	21
18988	1	6.31	4.2	0.618	45	2	80	3	4	1	29.25	1526	43.9	6704.45	1	24
27005	1	17.01	9.3	1.146	45	1	84	3	2	2	24.07	1323	0.011	7353.98	2	31
31149	2	14.92	7.98	0.67	45	2	85	3	2	2	21.63	1164	0.011	7423.27	2	52
46158	2	7.8	7.25	0.859	45	1	70	3	3	2	26.23	1267	0.423	7861.11	2	60
50755	2	6.56	4.68	0.769	45	2	75	3	3	2	29.04	870	0.011	6807.75	1	60
11189	1	8.75	9.06	0.782	45.1	2	75	3	2	1	27.48	1332	0.043	6015.97	2	22
15503	2	4.14	2.54	0.934	45.1	2	70	3	1	2		1141	682	6251.93	1	21
17768	1	25.07	9.22	0.793	45.1	2	68	3	4	2	36.7	1446	0.011	11451.1	2	19
27688	2	8.17	5.92	0.65	45.1	2	64	1	3	1	31.73	763	0.028	2852.08	2	42
28430	1	5.21	3.18	0.317	45.1	2	82	3	1	2	38.27	867	0.022	4794.22	2	43
31946	1	4.37	3.99	0.52	45.1	2	65	3	3	1	24.71	694	0.011	12563.6	1	49
37049	2	10.06	7.23	0.502	45.1	2	70	1	1	2	22.75	1043	0.037	8729.02	2	47
42015	1	8.96	6.55	1.107	45.1	2	79	3	4	2	20.31	1550	0.011	6072.82	2	60
48691	2	12.37	7.42	0.717	45.1	1	56	4	5	2	22.96	1448	1.1	4494.78	1	59
17242	1	6.61	6.18	0.574	45.2	1	83	3	4	2	22.96	2060	251	3339.57	2	22
17795	2	4.98	2.71	0.635	45.2	2	82	3	1	2		677	0.54	5968.94	1	21
30118	2	8.45	4.18	0.66	45.2	1	82	3	1	2	21.19	1509	0.024	2341.21	2	34
30807	2	4.94	2.76	0.548	45.2	2	65	1	1	2	34.5	816	0.011	589.798	2	38
35424	2	4.34	3.17	0.468	45.2	2	50	4	4	2	19.68	1723	405	10373.7	2	52
13731	1	7.8	5	0.499	45.3	2	65	3	4	2	20.66	1217	0.011	16636.4	1	19
15579	2	13.79	4.84	0.444	45.3	2	68	4	4	2	42.06	848	0.273	9014.11	2	28
20198	1	4.93	2.95	0.603	45.3	2	65	2	1	1	24.27	700		5064.72	1	17
34774	2	8.35	6.17	1.103	45.3	2	62	1	2	2	22.88	1317	15	4075.67	1	55
41675	2	6.32	7.68	0.442	45.3	2	71	3	3	1	24.53	1130	505	5226.62	2	59
20219	1	6.53	5.36	0.659	45.4	2	74	3	3	2	32.5	1672	0.082	14447.1	2	18
35891	2	16.79	5.36	0.625	45.4	1	63	4	4	1	29.82	930	248	2717.92	1	50
40335	2	5.19	4.76	0.647	45.4	2	61	5	3	1	31.76	831	0.052	2216.94	2	51
18294	2	15.22	3.52	0.639	45.5	2	70	3	3	2	20.94	919	0.035	6108.52	1	27
24703	2	16.98	7.73	0.636	45.5	1	60	4	4	2	36.47	1320	20.6	4863.36	1	38
26510	2	8.88	6.75	0.83	45.5	1	53	4	2	1	46.71	1540	0.17	9059.82	2	42
30584	2	8.02	6.18	0.741	45.5	2	59	3	5	2	32.26	1368	0.053	14836.4	2	32
32459	2	10.33	13.03	1.031	45.5	2	62	3	4	2	19.56	1317	297	8242.14	2	47
43862	2	9.71	7.16	0.651	45.5	1	53	4	3	2	30.45	1486	0.193	2543.32	1	68
44252	2	10.19	7.14	1.414	45.5	2	58	2	1	2	27.78	1773	0.011	1443.71	1	62
11507	2	4.37	9.97	0.203	45.6	1	85	1	1	1	22.78	764	48.9	881.151	2	17
13929	1	17.27	8.7	1.275	45.6	2	78	1	2	2	31.82	1195	0.112	639.023	1	28
25222	2	7.9	3.79	0.753	45.6	2	69	3	3	2	26.08	1765	0.1	4823.39	2	31
29214	2	6.52	5.62	0.808	45.6	1	85	4	2	1	17.44	936	0.02	1587.19	1	30
43180	1	7.29	7.23	0.757	45.6	2	64	4	4	2	35.64	1208	0.016	2575.23	1	68
44210	2	24.77	8.74	0.845	45.6	1	71	3	5	2	28.9	1128	0.011	1774.59	1	60
44299	2	15.28	5.38	0.96	45.6	1	67	1	3	2	25.01	1719	0.025	1438.9	2	71
47937	2	6.91	5.65	0.607	45.6	2	60	3	4	2	28.81	989	0.29	21477.4	2	60
51617	2	5.83	5.77	0.611	45.6	2	71	2	1	2	30.97	1031	0.016	2417.57	2	69
10282	2	6.1	8.04	0.58	45.7	1	58	4	3	2	38.89	1623		5134	1	25
21864	1	5.59	2.51	0.385	45.7	2	78	1	1	2	24.74	887	0.011	1098.15	2	40
22597	1	4.84	2.9	0.476	45.7	2	72	4	3	2	30.59	633	0.034	6569.54	2	33
33385	2	15.75	8.84	1.531	45.7	2	64	3	5	2	28.74	1326	0.056	35673.7	1	57
39363	2	9.91	6.1	0.744	45.7	2	50	4	3	1	47.07	1507	258	5628.17	2	49
24795	2	8.78	4.46	0.561	45.8	2	80	3	3	2	22.57	965	0.011	9266.57	1	35
30893	2	10.88	4.86	0.478	45.8	2	70	4	3	1	26.19	792	26.3	2758.28	1	35
42104	2	5.76	6.07	0.56	45.8	2	71	3	4	2	29.04	764	0.029	9403.61	2	69
49555	2	4.02	6.71	0.471	45.8	2	69	1	1	2	31.74	1022	0.171	1926.96	1	66
18068	2	5.62	3.54	0.537	45.9	2	72	3	2	2		1292	0.067	8007.81	2	16
22945	2	12.43	6.62	1.311	45.9	1	71	5	5	2	29.1	1455	0.058	2266.3	1	43
23675	2	11.15	9.05	0.28	46	2	63	4	3	2	36.37	533	0.02	7555.79	1	41
41452	2	5.45	5.61	0.753	46	2	60	1	1	2	31.77	1737	0.027	578.488	2	57
43632	2	6.62	5.17	0.684	46	2	65	2	3	2	35.33	865	0.074	1023.42	1	62
46572	2	9.36	7.09	1.844	46	2	61	4	5	2	25.48	1494	588	4973.21	2	67
31038	2	11.35	7.38	1.052	46.1	2	61	4	5	2	30.81	1567	0.011	5244.05	1	41
31400	1	9.49	6.42	0.626	46.1	2	78	3	4	2	24.52	1385	248	20546.3	1	56
34607	2	7.26	4.91	0.944	46.1	2	63	1	3	1	25.49	1004	0.022	578.488	2	57
42746	2	15.5	13.61	0.69	46.1	2	69	3	5	2	21.22	1243	0.017	23550.6	1	60
43991	2	7.18	3.88	0.987	46.1	2	61	2	1	2	41.43	1238	0.043	3559.79	2	65
44352	1	8.16	5.6	0.593	46.1	2	80	3	3	1	27.81	1374	0.035	15347.4	1	64
45393	2	6.64	3.85	0.653	46.1	2	59	3	3	2	16.86	1019	520	11230.6	1	67
49853	2	10.11	14.12	1.284	46.1	1	67	4	3	1	29.81	1641	0.106	1546.38	1	63
29020	1	11.56	5.15	0.746	46.2	1	76	3	3	2	26.98	1070	1.13	7397.18	1	29
36765	2	5.42	6.04	1.275	46.2	2	72	3	1	2	29.16	1275	0.011	8129.55	2	49
50279	2	14.5	9.51	0.802	46.2	2	57	4	3	2	41.14	1186	0.049	9998.37	1	59
11876	1	48.03	38.68	1.708	46.3	2	82	3	2	1	23.38	2382	0.707	3959.77	1	18
14445	2	21.45	8.88	1.371	46.3	2	73	4	4	2	23.99	1412	0.035	1394.87	1	20
15012	2	10.38	3.87	1.413	46.3	2	61	3	2	2		1027	295	16090	2	26
18674	2	6.46	4.48	0.563	46.3	2	71	5	5	2	26.52	898	0.038	13364.7	1	20
29475	2	6.27	4.72	0.591	46.3	1	66	1	3	2	36.12	1040	0.17	1010.82	1	34
33938	2	13.28	7.1	1.305	46.3	2	67	4	5	2	28.54	1544	0.017	6266.83	1	49
38388	2	10.66	5.37	0.665	46.3	2	64	3	4	2	27.39	1335	416	6986.36	2	44
44749	2	4.11	2.96	0.447	46.3	2	59	4	3	2	15.44	843	286	10942.7	2	68
49737	2	13.28	10.15	1.17	46.3	2	62	1	2	2	41.82	1003	0.011	1053.6	2	71
41960	2	8.88	5.96	0.58	46.4	2	80	3	3	2	25.8	1132	0.011	11157.2	2	62
47283	1	12.47	8.35	0.791	46.4	2	80	3	4	1	26.09	1522	0.033	8955.24	1	60
49947	2	12.91	18.12	1.172	46.4	2	70	4	2	2	36.31	1527	1.32	2241.55	1	59
10630	2	14.94	7.32	0.593	46.5	2	66	1	1	1	39.64	1063		1553.41	2	17
19670	2	8.12	6.09	0.996	46.5	2	75	4	4	1	50.84	861	1149	5054.45	1	27
24064	1	5.3	7.01	0.39	46.5	2	85	3	4	2	25.8	802	0.011	4329.35	2	30
42596	2	4.05	5.39	0.521	46.5	2	59	2	1	2	31.8	913	0.011	1780.1	2	72
50324	1	9.02	7.09	0.88	46.5	2	68	1	3	2	34.99	1024	8.36	2004.47	1	66
17297	2	10.99	8.82	1.029	46.6	2	85	3	3	2	25.7	1354	0.114	4698.13	2	27
24862	2	12.27	8.65	1.21	46.6	2	79	3	3	2	24.38	1039	35.5	13589.2	2	30
34127	2	6.17	5	1.258	46.6	1	85	3	4	2	27.07	758	0.011	4330.11	1	56
36642	2	17.47	6.45	1.14	46.6	1	84	3	1	1	25.72	1330	0.019	11444.3	2	46
36918	1	5.62	5.02	0.763	46.6	1	85	3	1	2	27.29	836	0.028	1657.49	1	45
18094	2	3.79	2.84	0.358	46.7	2	85	3	1	2	22.64	691	0.011	6201.6	2	21
18288	1	4.26	5.81	0.508	46.7	2	85	3	4	2	24.8	1498	0.011	3864.31	1	23
20757	2	29.5	19.47	1.195	46.7	1	62	3	5	2	33.13	1751	0.038	19653.5	2	15
21123	1	14.33	7.14	1.858	46.7	1	75	3	5	2	22.14	1352	0.011	6670.85	1	35
26804	2	7.58	3.51	0.789	46.7	2	75	4	1	2	44.04	1274	0.06	3659.45	1	36
27486	2	15.36	8.18	1.002	46.7	1	65	3	4	2	29.09	2243	0.357	5167.68	2	35
28422	2	20.67	6.09	0.754	46.7	1	85	3	4	2	28.13	1374	0.301	4644.43	1	32
30295	1	10.16	7.03	0.819	46.7	2	81	1	1	2	27.07	1151	0.02	1701.02	2	38
30302	2	14.29	9.78	1.161	46.7	2	53	4	2	2	21.61	3321	0.027	6173.59	2	31
47886	2	8.15	4.91	0.655	46.7	2	74	3	5	2	23	1202	339	7360.48	1	67
40824	2	27.16	12.73	1.803	46.8	1	71	3	4	2	26.69	2807	0.037	10263.8	1	44
45314	2	8.18	5.72	0.936	46.8	2	80	3	4	2	31.84	1978	0.123	7676.9	2	66
15048	1	6.56	4.2	0.502	46.9	2	83	3	4	2	26.53	1035	0.035	3634.91	2	18
17083	2	9.25	5.5	1.522	46.9	1	85	3	2	2		1445		2715.91	1	17
18019	2	10.72	4.03	0.589	46.9	1	85	3	2	2	20.11	1265	0.186	2795.67	1	14
27528	2	6.93	5.64	0.866	46.9	2	59	3	3	2	46.25	1192	0.395	7708.89	1	29
34058	2	9.67	5.2	0.638	46.9	1	71	3	3	2	25.13	1281	0.054	6702.67	2	50
35185	2	28.73	15.45	1.28	46.9	1	81	3	2	2	26.8	1614	0.044	7119.38	2	58
40540	1	8.48	8.72	1.013	46.9	1	82	3	4	2	28.52	1335	0.011	8590.8	2	53
46051	1	7.17	4.94	0.407	46.9	2	80	3	3	1	29.14	865	0.011	11528.6	2	63
47414	2	17.03	7.4	1.419	46.9	1	56	3	3	1	53.78	1958		4015.1	1	59
49573	1	9.9	4.26	0.424	46.9	2	80	3	4	2	23.72	1337	0.011	8054.36	2	64
23740	1	4.62	3.1	0.39	47	2	67	1	1	2	30.99	823	0.06	424.608	1	43
24583	2	7.85	7.17	0.562	47	2	63	3	3	2	26.03	1410	597	36847.6	1	42
33941	2	17.3	11.29	0.857	47	2	81	1	3	1	25.04	1598	0.011	1101.37	2	58
10411	2	10.68	6.2	0.848	47.1	2	85	4	4	2	33.55	1872	0.011	1862.45	1	27
25762	2	6.98	7.23	0.876	47.1	1	63	1	1	2	30.94	1261	0.011	551.888	2	40
28744	2	9.28	5.38	1.334	47.1	2	56	4	4	2	25.62	1672	0.052	7277.22	2	37
28886	1	4.56	2.66	0.517	47.1	2	80	3	4	2	26.25	973	56.3	6784.06	1	42
50380	1	7.69	11.34	0.875	47.1	2	76	3	4	2	42.93	1039	0.017	8298.67	2	62
51264	2	5.24	4.33	0.596	47.1	2	71	2	1	2	29.12	1035	0.011	1430.93	2	71
13370	2	7.21	4.37	0.989	47.2	2	83	3	3	1	38.14	1165	0.029	6864.23	1	14
21792	1	7.73	2.3	0.495	47.2	2	79	3	4	1	26.7	448		8194.72	1	35
27527	1	8.01	5.74	0.713	47.2	2	81	3	2	2	22.99	1217	0.578	9800.3	2	35
37270	1	14.57	7.71	0.633	47.2	1	85	3	1	2	26.73	1358	0.019	3922.45	1	53
39022	2	4.87	7.03	0.182	47.2	1	55	4	5	2	25.46	864	0.023	4651.36	1	51
46990	2	7.6	5.22	1.754	47.2	2	54	4	5	2	32.52	1208	0.019	11020.3	2	67
18271	1	7.94	4.27	0.488	47.3	2	73	3	3	2	24.48	1135	0.021	11512	1	21
23447	2	6.66	4.87	0.778	47.3	2	60	1	4	2	44.9	1604	0.061	3376.01	1	34
28662	2	16.19	9.68	0.95	47.3	2	61	3	4	2	28.43	1436	0.022	17500.5	1	38
41216	2	5.47	4.33	0.423	47.3	2	61	1	1	2	18.73	683	0.011	4073.69	1	56
45257	2	26.04	17.36	2.692	47.3	2	78	3	5	2	27.37	1909	0.011	11192.6	1	60
45333	2	4.01	4.93	0.329	47.3	1	57	3	3	2	24.05	813	392	10124.4	1	61
46145	1	10.95	7	1.238	47.3	2	80	3	5	1	23	1432	0.011	16616.3	2	66
48986	2	15.71	3.7	1.184	47.3	1	80	1	1	2	24.38	1332	0.011	1363.72	2	71
12896	1	21.47	7.57	0.741	47.4	2	68	3	5	2	30.33	1201	0.011	11451.1	2	19
31733	1	8.62	6.01	0.999	47.4	1	79	3	5	2	23.47	1261	0.05	7010.17	2	44
19096	1	5.7	4.43	0.632	47.5	1	84	4	2	1	27.21	761	0.035	2482.23	2	26
21537	1	5.95	4.33	0.516	47.5	2	83	3	3	2	30.14	1199	0.034	5755.09	2	31
22527	1	5.58	9	0.486	47.5	2	85	3	4	1	30.33	818	0.025	5315.38	2	35
30351	2	12.94	4.58	0.828	47.5	2	61	3	4	2	24.15	1496	0.036	19913.3	2	34
36975	2	17.88	6.1	0.728	47.5	1	75	3	5	2	25.31	1373	0.092	10297.9	1	51
41220	2	9.05	2.87	0.484	47.5	1	82	4	2	2	20.85	1572	0.127	2998.62	2	45
41715	2	8.36	5.77	1.006	47.5	2	74	3	3	2	24.33	1297	0.011	8655.29	1	62
44072	2	4.04	5.47	0.832	47.5	2	54	4	5	2	22.25	893	0.107	4226.09	1	63
45621	2	13.63	6.51	0.855	47.5	2	78	3	5	2	26.54	1299	0.027	8268.47	1	63
16254	1	10.76	4.33	1.09	47.6	2	74	1	1	2	31.97	1254	0.011	1559.12	1	28
21909	2	10.22	6.85	0.596	47.6	2	85	3	3	2	27.08	854	0.036	6249.6	1	33
46076	1	5.84	3.84	0.675	47.6	2	80	3	3	1	24.18	916	0.011	8880.55	2	62
46857	2	7.84	6.2	0.407	47.6	2	72	3	2	2	28.32	1191	0.025	9726.74	2	60
49654	2	10.59	7.98	1.221	47.6	2	65	3	5	2	27.25	995	0.017	10913.6	1	67
51378	2	9.29	5.94	0.62	47.6	2	63	1	2	2	25.51	1070	128	1591.9	2	65
14697	2	9.38	2.65	0.326	47.7	1	51	4	3	1	41	1764	135	4709.12	1	24
19584	2	6.55	5.91	0.66	47.7	2	73	4	1	1	37.17	950	0.658	4428.65	1	14
22069	1	19.08	4.09	0.741	47.7	2	85	3	1	2	24.95	1451	0.021	3349.08	2	40
27584	1	10.95	5.24	0.396	47.7	2	75	3	2	2	25.59	925	0.594	8231.01	1	30
29762	2	5.67	6.63	1.126	47.7	1	61	1	3	2	29.47	978	0.011	1601.12	1	40
37033	1	4.9	5.22	0.582	47.7	1	70	4	4	1	34.76	1133	0.018	1430.97	1	51
43399	2	8.16	5.44	0.918	47.7	2	58	4	3	2	32.57	1424	0.094	9759.46	2	67
44703	1	9.42	7.19	0.789	47.7	1	80	3	4	2	29.57	1905	0.011	5137.73	1	69
50974	2	4.81	4.37	0.332	47.7	2	71	2	1	1	31.23	878	0.03	2004.41	1	72
10950	2	5.79	3.63	0.462	47.8	1	85	3	5	2		645		2368.45	2	27
19073	2	5.32	4.58	0.436	47.8	1	51	4	4	2	37.46	1200	0.016	4916.82	1	15
23839	1	13.35	6.71	1.355	47.8	1	85	3	5	2	23.02	1058	0.011	4444.74	1	29
27418	1	14.26	10.06	1.391	47.8	1	85	3	5	2	24.74	1667	0.016	3618.59	1	41
28545	2	12.6	9.57	1.321	47.8	1	80	3	3	2	29.06	1190	0.011	2016.36	2	30
41398	1	6.28	5.31	0.73	47.8	2	59	3	3	1	44.89	1516	2.45	8460.26	2	47
47030	2	4.77	6.45	0.516	47.8	2	80	2	3	2	23.48	822	0.011	2592.46	1	72
51302	1	6.15	5.61	0.452	47.8	1	68	3	2	1	23.91	1178	229	6055.38	1	67
15797	2	4.33	2.25	0.316	47.9	2	61	3	3	2	40.74	610	244	11254.4	2	24
23816	2	14.6	6.61	0.879	47.9	2	62	4	4	1	36.75	1296		1931.26	2	39
37524	1	19.37	5.48	1.1	47.9	1	84	3	1	1	27.01	2036	191	3790.92	1	49
39093	2	4.1	4.65	0.857	47.9	1	60	3	5	2	31.2	1003	252	31683.6	1	56
41501	2	6.33	4.7	0.633	47.9	1	70	3	1	1	36.27	771	442	6978.26	1	59
44688	1	4.52	1.82	0.378	47.9	1	80	2	3	2	18.41	471	0.031	1477.55	1	72
44970	2	5.64	2.47	0.637	47.9	2	56	3	5	1	48.94	1099	0.011	15662.9	2	59
11586	2	7.26	3.72	0.766	48	1	68	4	2	1	27.25	1672	0.079	1361.73	2	24
14656	2	3.83	3.29	0.383	48	2	58	4	1	2		1522	30.5	3317.83	1	20
19716	2	12.1	12.34	0.745	48	2	57	3	2	1	48.37	907	0.035	7513	2	22
20120	1	17.1	3.85	0.712	48	2	72	4	2	2	31.37	1247		2059.71	2	25
45705	2	8.1	4.7	1.422	48	2	56	3	3	1	49.09	843		10855.4	1	64
47271	1	5.24	5.14	0.62	48	2	80	3	5	1	28.15	1043	31.1	13775.6	1	63
11097	2	5.92	3.65	0.491	48.1	2	62	4	2	2	27.12	925	0.153	1603.31	2	15
28416	2	9.98	5.62	1.032	48.1	1	84	3	4	2	27.08	1339	0.011	2298.38	1	31
32154	2	6.89	5.37	0.791	48.1	2	63	4	3	2	39.69	1303	0.022	4005.82	1	51
35558	1	3.67	2.52	0.572	48.1	2	84	2	1	2	18.83	752		8552.05	2	45
45369	2	17.85	7.18	1.287	48.1	1	80	3	4	2		1243		2266.98	1	65
12254	2	18.35	8.7	0.836	48.2	2	64	4	1	2	23.91	1315		6943.61	1	14
12674	2	7.65	5.61	0.58	48.2	2	65	3	3	2	26.88	1152	0.115	7550.12	1	21
27457	2	6.88	4.94	0.493	48.2	2	68	4	2	2	34.1	1265	0.08	2040.31	2	31
27810	2	9.29	6.46	0.916	48.2	2	71	1	2	1	28.1	1092	0.099	1804.2	1	34
31344	2	21.54	8.11	1.246	48.2	2	55	3	5	2	32.18	1331	0.011	11909.7	2	52
32615	1	6.34	5.01	0.628	48.2	2	64	1	1	1	28.97	1286	78.3	1620.03	1	57
43606	2	14.87	5.15	0.903	48.2	2	80	3	3	1	32.08	1354		16179.8	2	67
45437	2	8.02	8.56	0.477	48.2	2	61	1	1	2	33.66	1152	0.011	2726.18	2	72
45816	2	30.05	23.66	0.512	48.2	2	55	4	4	1	48.04	911	2.18	4487.67	1	68
13518	2	7.23	4.72	0.76	48.3	2	55	4	5	1		1285	389	3835.44	2	20
38143	2	28.61	8.28	0.753	48.3	2	60	5	1	2	26.15	1115	249	5759.95	2	50
39170	2	11.37	7.44	0.839	48.3	1	77	3	3	2	30.17	1028	0.099	13575.1	2	56
42211	2	15.95	9.88	0.735	48.3	2	61	3	5	2	25.57	1379	0.024	12633.1	1	67
11285	1	3.94	3.86	0.443	48.4	2	77	3	3	2	19.87	735	0.011	4436.66	2	23
11833	1	18.63	14.12	1.292	48.4	2	77	3	4	2	24.6	1833	0.027	9212.71	2	23
19162	2	10.4	10.78	0.817	48.4	2	61	3	4	2	40.05	1017	0.673	15110	1	23
19916	2	4.43	2.29	0.445	48.4	1	63	1	1	2	35.05	625	0.011	316.625	1	17
28768	1	11.58	7.2	1.346	48.4	2	74	3	3	1	28.53	1432	0.035	11581.3	2	34
31903	2	8.71	7.29	1.239	48.4	2	73	3	5	1	24.74	1635	0.011	12675.3	1	56
38933	1	20.91	14.22	1.651	48.4	1	85	3	1	2	21.83	1934	491	4447.4	2	46
47610	1	7.06	3.32	0.63	48.4	1	63	2	1	1	24.4	816	0.024	763.46	1	62
13620	2	13.22	8.27	0.477	48.5	2	73	3	2	2	28.38	1595	0.064	5965.44	1	23
32742	2	24.16	14.26	0.782	48.5	1	55	3	3	2	17.97	1266	223	5645.56	1	45
41868	1	17.39	10.97	1.061	48.5	1	78	3	1	2	29.9	2069	0.129	11718.7	2	60
49804	1	21.65	12.48	0.821	48.5	1	80	3	1	2	27.25	1043	0.023	4195.19	1	61
12570	2	4.26	3.96	1.094	48.6	1	55	3	4	2	30.74	1172	0.018	28314.6	2	21
24137	2	7.58	7.89	0.731	48.6	1	70	4	2	2	27.08	1363	0.049	2823.4	1	36
27391	2	11.4	20.15	2.176	48.6	2	55	3	4	2	26.4	2713	0.041	41927.5	1	38
39352	2	5.49	8.52	0.835	48.6	2	77	4	1	2	19.02	1126		11582.2	2	50
47163	1	6.47	6.22	1.028	48.6	2	80	2	3	2	28.31	1411	0.02	2162.29	1	62
16238	1	7.4	5.66	0.594	48.7	2	80	3	5	2	23.64	1063	0.011	6029.22	2	28
23490	1	5.94	3.45	0.382	48.7	2	77	4	1	1	35.91	714	0.047	4185.66	2	41
25938	2	6.28	6.31	0.581	48.7	1	70	3	4	2	31.83	1562	0.07	18315.5	1	31
36959	2	15.34	8.75	0.773	48.7	1	80	3	1	2	24.92	1520	0.326	2263.69	2	46
37874	1	23.68	8.63	0.867	48.7	2	81	3	3	2	25.11	1316	150	11474.3	2	47
51357	2	8.9	6.58	0.618	48.7	1	59	1	1	2	25.01	1406	0.011	1335.72	1	70
15238	2	6.73	3.88	0.801	48.8	1	56	4	2	2	22.47	1078	209	3601.12	2	16
16200	2	8.89	3.98	0.851	48.8	2	66	3	4	2	19.82	1288	0.011	21812	2	24
17150	2	10.92	8.7	1.952	48.8	1	54	4	4	1	28.86	1952	255	10663.4	1	16
19340	2	13.82	7.11	0.619	48.8	2	70	2	2	2	35.8	1400	0.16	2014.1	1	20
36713	2	7.72	5.74	0.955	48.8	2	70	3	4	2	22.63	1078	0.011	26165.5	2	48
42285	2	7.68	4.62	0.687	48.8	2	61	2	5	2	27.04	1147	0.011	1102.55	1	72
47962	1	7.24	4.24	0.774	48.8	2	80	1	1	1	23.74	996	0.011	2156.83	2	65
48320	1	7.92	3.83	0.517	48.8	1	78	2	1	1	24.81	1271	0.252	2633.3	2	62
12017	2	9.81	7.88	0.843	48.9	2	81	1	4	2	27.48	1143	0.011	2695.84	1	15
14753	2	6.66	3.52	0.798	48.9	2	80	3	4	1	39.56	1317	0.011	4359.71	2	19
21165	1	5.92	3.45	0.614	48.9	2	75	3	1	2	27.45	1924	386	13874.2	1	32
25828	1	8.85	5.69	1.024	48.9	2	81	3	5	2	24.05	1458	0.011	7115	1	29
28110	2	8.8	3.44	0.328	48.9	1	53	4	2	2	22.79	1537	0.459	5467.42	1	30
40475	2	13.75	3.57	0.391	48.9	2	51	4	3	2	24.79	927	171	2647.96	2	45
50558	2	7.89	4.09	0.825	48.9	1	79	1	1	2	25.57	1032	0.011	2539.87	1	66
10154	2	6.95	5.24	0.756	49	2	72	4	4	2	26.9	1277	0.159	3751.59	2	14
20689	2	6.65	8.82	0.397	49	1	64	3	3	1	31.23	829	288	15740.3	1	26
21111	1	8.08	3.77	0.444	49	2	85	2	1	2	24.62	1296	0.026	4946.51	2	35
21433	2	7.76	3.71	1.028	49	2	66	3	4	2	24.06	808	0.204	24023.6	2	42
50605	2	4.9	7.46	0.348	49	2	64	4	4	2	31.57	1132	0.39	2417.81	1	71
11694	2	8.52	4.93	0.575	49.1	2	57	4	5	2	18.35	1076	123	5303.6	1	20
11828	1	10.46	7.58	0.351	49.1	2	84	3	4	2	24.44	1310	0.035	16787.1	1	26
12164	1	10.16	5.46	1.085	49.1	2	84	3	4	2	22.2	1567	0.011	4799.5	2	24
20884	2	6.62	7.21	1.305	49.1	2	82	3	4	2	25.16	1164	0.011	3234.35	1	19
21635	1	8.41	4.13	0.623	49.1	2	65	5	4	1	37.3	1367	0.06	8358.98	2	34
21958	2	23.43	3.01	0.426	49.1	2	80	4	4	2	25.04	827		12162.9	1	38
23224	2	11.06	6.46	1.082	49.1	1	61	3	2	2	27.27	1500	0.12	9411.98	1	38
24611	1	5.84	4.55	0.625	49.1	2	81	3	3	2	24.7	997	0.153	5109.16	2	32
31294	2	13.83	9.82	0.569	49.1	2	73	3	4	2	25.94	958	0.011	20089.3	1	48
36725	2	10.27	5.27	0.965	49.1	2	69	3	3	2	29.6	1201	0.039	20551.9	1	54
42220	2	7.85	6.09	0.908	49.1	1	69	3	4	1	28.57	1300	0.011	13662.1	1	60
45472	2	7.23	7.53	0.793	49.1	2	77	2	1	2	30.5	1032	0.011	3359.25	2	65
48715	1	5.75	3.44	0.667	49.1	2	73	1	1	1	27.65	790	0.011	2186.38	2	65
49827	2	11.03	3.66	0.491	49.1	2	76	3	1	2	25.35	1167	49.4	4309.49	2	59
21300	1	7.42	4.91	0.676	49.2	2	83	3	3	2	29.8	1082	0.011	4165.52	1	29
22488	2	18.21	13.29	1.795	49.2	2	63	3	1	1	39.24	1079	0.888	12264.3	2	34
35620	2	26.26	5.71	1.086	49.2	2	83	3	4	2	27.73	1766	0.025	6304.03	1	55
41946	2	13.22	5.68	0.562	49.2	2	65	4	3	2	32.26	1094	0.041	1889.49	2	64
45243	1	6.75	7.75	0.581	49.2	2	76	3	2	2	23.19	1089	0.011	11524.6	1	61
50989	2	20.49	6.1	1.064	49.2	2	62	2	5	1	33.54	1492	0.011	843.598	2	73
20870	1	12.47	8.43	0.287	49.3	1	85	3	1	2	22.58	1334	0.052	2315.81	1	26
35689	1	24.03	13.84	1.505	49.3	2	71	3	1	2	26.49	1625	0.072	8618.88	2	46
36586	2	8.18	10	0.695	49.3	1	76	4	1	1	30.51	965	11.8	5461.29	2	53
37510	2	14.73	11.67	1.345	49.3	1	73	3	5	2	27.62	1885	0.035	10838.8	2	52
49243	2	15.63	12.26	1.356	49.3	2	62	3	1	2	22.88	1483	552	6482.92	1	67
11733	2	15.43	11.89	1.523	49.4	1	70	3	5	2	20.73	1896	0.053	6363.68	1	27
26359	2	7.68	4.63	0.616	49.4	2	72	5	3	2	19.4	1469	13.1	7758.39	1	38
33675	2	10.98	7.08	1.201	49.4	2	56	3	4	1	38.29	1298	0.011	10859.3	2	53
41705	2	12.01	3.95	0.738	49.4	1	62	4	3	2	23.29	1703	75	3364.91	2	59
45646	2	8.4	6.77	0.613	49.4	2	52	4	3	2	38.98	1228		12412.1	2	71
45922	2	6.54	5.2	0.981	49.4	2	63	1	1	1	36.57	1228	0.011	3783.98	1	66
12733	2	11.13	9.63	0.516	49.5	2	58	2	2	1	23.68	870	0.025	26946.2	2	27
29207	2	21.33	6.96	1.117	49.5	2	53	4	3	2	34.8	1420	0.011	3892.94	2	31
39246	2	7.94	2.77	0.533	49.5	2	85	3	2	2	32.65	1196	0.011	11712.4	2	55
49255	2	5.61	2.97	0.84	49.5	2	65	4	3	2	28.84	825	68.4	2436.96	1	63
20153	2	9.56	5.75	0.702	49.6	2	79	3	3	2	29.36	1472	0.011	10687.7	1	23
26544	2	7.45	5.22	0.71	49.6	1	81	3	4	1	23.44	1287	0.057	4444.74	1	29
38738	2	6.08	4.4	0.493	49.6	1	59	1	1	2	30.78	926	0.035	1766.04	1	58
41755	2	14.63	12.46	1.367	49.6	2	79	3	2	2	25.79	1399	113	7360.48	1	67
48265	2	7.25	3.06	0.362	49.6	2	61	3	3	2	28.82	1521	116	22574	1	67
12126	2	8.02	7.16	0.801	49.7	1	60	1	1	2		1249	0.074	638.93	2	15
34254	2	9.57	7.11	1.025	49.7	2	51	4	2	2	46.64	1602	0.086	3420.4	2	51
42591	1	8.56	5.81	0.761	49.7	2	68	4	5	2	23.65	1476	0.011	2167.93	1	72
49294	2	12.34	10.65	1.644	49.7	2	59	3	5	2	20.05	1426	153	17161.1	1	71
22723	1	8.46	4.03	0.532	49.8	1	81	3	3	2	23.56	1499	172	3556.59	1	29
24400	1	8.91	7.62	0.82	49.8	2	63	3	4	2	29.55	1804	0.686	14446	2	34
27579	1	12.78	13.6	1.498	49.8	2	85	3	5	2	20.7	1329	0.011	4258.36	1	35
11177	2	7.34	10.82	0.765	49.9	1	83	3	1	2		798	23.1	4367.33	1	23
14940	2	6.21	5.7	0.9	49.9	2	69	4	4	2	28.75	1416	0.021	4294.22	1	14
15819	2	7.14	9.96	1.062	49.9	1	77	2	1	2		1664	0.199	5838.43	2	27
22893	1	25.91	21.79	0.988	49.9	1	85	3	1	1	20.11	1388	0.011	5795.32	2	34
28332	1	4.35	3.16	0.295	49.9	2	77	1	1	2	21.44	572	0.293	1871.04	1	34
37829	2	18.82	3.83	0.86	49.9	2	74	4	2	2	27.34	1206	0.022	3787.06	2	54
39379	2	4.76	2.91	0.496	49.9	2	67	1	1	2	36.03	919	0.011	519.898	1	58
42960	2	6.6	6.02	0.95	49.9	2	59	3	3	2	24.75	1193	0.016	44476.9	1	60
45628	2	15.81	11.47	1.044	49.9	2	69	1	1	1	34.58	1544	227	3159.94	2	66
48788	2	5.97	3.88	0.538	49.9	2	60	3	5	2	47.17	1134	0.021	11490.7	2	63
13888	2	8.07	5.82	0.683	50	2	59	1	4	2	33.56	1560	0.044	12530.5	2	24
18989	1	7.25	11.58	0.62	50	1	59	4	3	2	26.25	1647		4704.53	1	27
28228	2	11.92	13.1	1.957	50	2	60	3	5	1	28	1322	178	9088.63	2	39
28835	2	23.25	7.11	0.781	50	1	78	4	3	2	24.79	1621	414	4804.6	1	30
34965	2	9.22	5.26	1.21	50	2	59	1	1	1	21.83	909	0.011	1731.57	1	58
36697	2	39.54	29.8	1.916	50	1	81	3	5	2	27.22	2369	0.03	5672.29	1	56
42405	2	22.63	18.7	1.399	50	2	71	3	3	2	29.05	1400	0.011	5192.89	2	64
42949	2	7.4	5.2	1.189	50	2	60	3	4	2	28.68	1252	0.011	16865.5	1	67
43077	2	4.67	2.82	0.543	50	2	62	1	2	2	32.22	645	0.011	1642.44	1	71
22122	2	10.24	9.55	1.062	50.1	1	72	3	3	2	30.2	1215	0.078	9441.45	2	34
26267	2	9.16	4.5	0.993	50.1	1	63	4	5	2	30.28	1256	0.37	3935.33	1	42
31622	2	6.26	3.26	0.632	50.1	2	71	4	3	2	30.21	993		5236.42	2	50
32075	2	18.93	11.51	0.906	50.1	2	85	3	3	2	26.25	1347	0.043	5028.34	2	44
42127	2	12.61	11.09	1.055	50.1	2	60	2	2	2	28.77	1741	0.098	1389.6	1	60
42165	1	4.88	5.63	0.249	50.1	1	67	4	1	2	36.16	641	400	1944.01	1	59
13556	2	6.09	7.36	0.538	50.2	1	72	2	1	2	20.83	1161	3.58	13345.8	2	27
22646	1	8.51	7.74	0.686	50.2	1	72	3	2	2	18.26	1762	1.2	8293.62	2	32
23265	1	7.47	8.31	0.775	50.2	2	78	3	4	2	26.28	1749	0.028	17151.7	2	31
24900	2	19.27	6.1	0.822	50.2	2	58	1	1	2	27.43	1683	0.067	2658.1	1	34
29321	1	17.78	10.04	0.735	50.2	2	85	3	3	2	27.15	1251	0.011	4227.15	2	39
36484	2	19.11	12.98	1.016	50.2	1	85	3	3	2	25.03	1428	0.011	11862.1	2	54
45114	1	14	5.84	1.391	50.2	1	80	3	5	2	24.92	1570	0.019	9025.26	2	60
19972	2	11.61	6.58	0.931	50.3	2	64	3	5	2	26.89	1569	0.016	18590.9	2	14
36331	2	13.63	10.57	0.784	50.3	2	85	3	2	1		1245	0.035	9982.36	1	47
50752	2	26.93	10.79	1.086	50.3	1	70	3	4	2	23.13	1716	0.024	6483.69	2	64
10037	1	7.62	11.48	0.504	50.4	2	85	3	1	2	37.39	525	0.035	8480.85	1	18
12838	2	8.16	4.94	1.415	50.4	2	64	4	4	2	24.73	1432	0.035	1672.09	1	24
13643	2	5.15	4.3	0.548	50.4	1	70	4	2	2	30.65	915	11.1	1331.38	1	24
15863	2	8.66	5.09	8.377	50.4	2	81	4	2	2	26.27	719	129	10377	1	26
33260	2	10.14	3.78	0.409	50.4	1	67	3	2	2	28.54	784	0.052	6198.47	2	51
41915	2	7.18	5.8	0.661	50.4	2	63	3	5	2	26.65	1609	0.011	18920.1	2	62
43635	2	5.24	2.98	0.6	50.4	2	64	1	1	2	29.91	1042	0.302	1025.53	1	71
45556	2	7.21	3.71	0.852	50.4	2	56	3	4	2	21.9	1318	505	31660.1	2	64
45777	2	6.35	7.77	0.664	50.4	2	67	3	5	2	24.59	921	0.025	10963.8	2	66
46800	2	10.2	11.76	1.421	50.4	1	68	3	5	2	31.69	1785	0.021	19617.9	1	63
25081	2	12.74	11.33	1.239	50.5	1	65	3	4	1	34.69	1665	0.032	9110.68	2	40
27661	2	7.2	2.54	0.453	50.5	2	58	3	2	2		779	542	14718.6	2	31
29286	2	12.18	10.18	0.919	50.5	2	62	3	3	2	24.19	1560	0.063	34048.8	2	32
45754	1	8.26	32.33	2.066	50.5	1	65	3	5	2	37.43	634	0.081	6721.02	2	72
50074	2	16	12.57	1.322	50.5	2	66	1	3	2	28.86	1170	0.021	1172.04	2	72
17771	2	9.93	5.47	0.893	50.6	2	53	4	5	1	30.36	1376	267	4930.99	1	20
37293	2	6.46	2.28	0.561	50.6	2	72	4	3	2	35	1021	0.016	6497.49	1	51
44201	2	16.99	12.59	1.418	50.6	1	76	3	4	2	21.02	1876	0.011	4513.59	2	59
50934	1	21.79	5.92	0.756	50.6	2	76	3	4	2	25.57	1080	267	6958.08	2	60
10886	2	5.03	5.23	0.708	50.7	2	68	3	2	2	32.17	1164	0.201	15509.5	1	22
13639	2	8.46	4.62	0.775	50.7	2	71	4	1	2	30.77	1113		2276.99	2	25
14074	2	7.56	6.51	0.697	50.7	2	83	3	4	2	26.86	1085	0.035	7449.78	1	18
17265	2	26.91	10.43	3.483	50.7	1	58	4	2	2	20.26	1091		6145.8	1	14
27642	2	6.94	7.31	0.471	50.7	2	57	5	4	2	24.09	2173	4.76	8022.39	1	38
29989	2	7.16	10.04	0.569	50.7	2	63	4	3	2	33.7	1328		5315.66	2	29
43433	2	8.09	7.92	1.457	50.7	2	55	3	4	2	21.77	1911	0.011	18667.6	1	69
44788	2	36.6	21.02	1.398	50.7	1	80	3	3	2	26.08	1055	0.045	5995.46	2	67
45492	1	5.84	3.57	0.705	50.7	1	78	1	1	2	32.21	870	0.026	2167.88	2	64
48006	2	17.7	15.95	1.254	50.7	1	78	3	3	1	28.73	1231	0.021	8546.39	1	67
12181	1	5.39	7.48	0.393	50.8	2	60	4	2	2	30.09	1152	170	6206.88	2	20
16938	2	14.53	7.56	0.966	50.8	2	66	1	4	2	27.88	1119	0.011	1104.7	2	17
26916	2	10.43	6.46	0.902	50.8	1	68	3	5	1	24.63	1827	217	31054.5	2	34
31795	2	10.13	6.77	1.164	50.8	2	60	1	1	2	24.7	1214	0.011	3974.5	2	58
33960	2	9.37	10.66	1.282	50.8	2	59	4	2	2	50.22	2346	0.018	2098.16	2	45
44116	1	9.91	6.18	0.889	50.8	2	80	1	1	2	21	742	0.017	2331.6	2	66
45278	2	6.8	3.91	0.59	50.8	1	69	3	4	2	34.08	989	0.011	15651.8	2	60
10903	2	15.53	14.53	0.682	50.9	2	66	1	1	2	29.34	1481	0.341	473.282	2	25
11676	1	17.35	6.64	0.766	50.9	2	85	3	4	2	22.91	1294	0.035	5144.6	2	26
11959	2	14.64	4.31	0.44	50.9	2	67	3	3	2	46.48	1249	123	13539.6	1	26
12553	1	17.3	39.24	3.747	50.9	2	64	3	2	2	24.47	2419	0.035	21891.8	2	23
20520	2	6.75	4.27	0.635	50.9	2	71	3	3	2	33.08	967	0.011	12181.7	2	20
24181	2	7.94	4.91	0.73	50.9	1	85	4	4	2	21.87	1233	0.028	1529.23	1	41
28800	2	10.27	5.08	0.502	50.9	1	85	3	2	2		889	0.015	2315.13	1	29
32211	2	14.91	11.42	0.738	50.9	1	55	3	4	2	27.68	1435	0.011	45629.6	2	55
37793	2	9.21	10.17	0.861	50.9	1	61	1	4	2	26.39	2279	0.039	733.46	2	56
43749	2	8.84	6.56	0.538	50.9	1	63	2	3	2	21.04	1220	203	1223.89	1	72
49906	2	13.62	4.6	0.56	50.9	1	73	3	1	1	30.16	1146	146	1861.47	1	67
13507	2	5.72	4.26	0.606	51	1	57	3	5	2	29.74	1063	0.639	22201.4	1	23
18799	1	24.67	20.48	0.6	51	2	84	3	3	2	21.78	1052	0.011	4187.77	2	16
28427	2	6.91	7.13	0.865	51	2	81	1	1	2		1261	0.011	948.439	1	34
35053	2	5.44	4.82	0.619	51	2	80	3	5	2	27.02	871	0.018	12643.4	1	57
37413	2	11.26	4.7	0.644	51	2	62	1	4	2	31.56	1161	0.011	5828.73	2	55
46376	2	17.64	6.76	1.431	51	2	80	5	3		25.3	1210	0.25	6713.88	1	60
47699	2	13.07	5.61	0.486	51	2	71	4	2	2	16.87	1123	367	4541.95	1	64
49177	2	13.83	6.68	0.749	51	2	63	1	2	1	43.14	1061	0.019	1553.67	2	64
50067	2	26.39	17.48	1.453	51	1	74	3	5	2	24.76	1512	0.02	11572.6	1	60
51024	2	6.62	6.46	1.244	51	2	74	4	2	2	30.12	1383	0.03	5054.02	1	59
15067	2	8.39	3.34	0.834	51.1	1	81	3	3	2		1939		2373.26	2	21
17559	2	14.3	15.2	0.602	51.1	1	85	3	4	2		1139	0.011	5156.64	2	19
20922	2	7.45	5.35	0.897	51.1	2	55	1	3	2	24.7	1101	239	2274.97	2	23
35120	2	5.05	5.92	0.434	51.1	1	76	4	1	2	33.07	1011	0.547	1686.51	2	48
43934	1	6.55	4.95	0.58	51.1	1	80	3	3	2	33.7	1250	0.023	4363.47	1	70
46368	2	14.66	6.92	0.846	51.1	2	68	2	5	2	33.52	1056	0.011	1686.85	1	72
47265	1	6.81	4.29	0.756	51.1	2	69	2	3	1	25.69	884	0.015	1961.08	2	66
11092	2	14.58	9.27	0.824	51.2	1	66	3	5	2	27.25	2001	0.011	13067.8	2	19
12585	2	15.59	5.3	0.705	51.2	2	81	3	3	2	29.9	1107	0.016	2495.7	1	17
17860	2	7.71	8.09	0.82	51.2	2	82	3	3	2	25.53	1159	0.011	7761.3	2	18
17861	2	6.37	4.47	0.846	51.2	2	68	1	2	1	28.66	1028	55.6	1035.75	2	23
32328	2	9.11	7.05	1.122	51.2	2	81	3	4	2	23.7	2295	0.011	9260.14	2	50
33625	2	18.43	15.25	0.486	51.2	2	81	3	3	2	25.15	1104	0.011	6556.97	1	52
35087	2	6.89	5.57	0.928	51.2	2	60	3	5	2	30.03	1100	0.08	19056.3	1	55
42738	2	9.19	3.85	1.001	51.2	1	75	1	3	2	22.67	1091	0.016	1695.15	1	66
49120	2	5.64	6.89	0.705	51.2	2	60	3	3	2	21.47	1444	163	11062	1	67
50029	2	14.72	7.55	0.761	51.2	2	65	1	1	1	31.47	879	0.011	1289.82	2	66
11557	1	12.09	10.08	0.918	51.3	2	81	3	3	2	17.74	1436	0.019	3259.17	1	17
13205	1	16.71	9.41	1.502	51.3	2	68	3	5	2	24.93	1856	0.011	10185.4	1	16
17637	2	9.75	6.08	1.401	51.3	1	52	4	4	1	29.39	1326	0.117	10692.5	2	20
27942	1	8.17	10.77	1.124	51.3	2	82	3	4	2	27.26	1539	0.026	5795.87	2	39
32530	2	9.3	5.78	0.552	51.3	2	72	3	4	2	22.85	822	0.025	18977.9	1	49
32984	2	14.07	5.32	1.651	51.3	1	64	4	2	1	20.68	1589	419	2166.81	2	54
33982	1	4.34	2.59	0.382	51.3	2	85	3	3	2	26.72	802	0.015	9200.28	2	52
38611	1	10.32	5.45	0.62	51.3	1	77	4	3	2	35.72	1337	189	4423.43	1	48
41699	2	4.6	4.78	0.37	51.3	1	51	4	4	1	41.12	683	0.024	3965.88	1	65
42772	2	12.14	6.55	0.491	51.3	2	65	3	3	2	36.37	1067	0.024	5387.68	1	64
45147	2	5.62	8.64	0.428	51.3	1	72	1	3	2	26.92	587	0.477	2248.9	1	66
48496	2	9.79	10.21	1.069	51.3	1	58	4	4	1	27.98	1643	0.27	2882.98	1	63
50055	2	9.34	3.24	0.52	51.3	2	79	4	2	2	27.38	1453	0.023	3654.41	2	67
11948	2	16.34	5.37	1.534	51.4	1	71	5	4	2	23.7	1421	0.021	3780.72	2	17
12061	2	7.55	4.9	0.695	51.4	2	60	3	4	1	24.07	1173	97.6	18298	1	26
19445	1	6.46	2.85	0.677	51.4	2	80	1	1	1	18.99	762	0.303	1219.28	2	27
30072	2	34.75	7.07	0.715	51.4	2	60	1	4	2	29.48	1385	0.011	711.647	1	34
38348	2	8.89	7.91	1.073	51.4	2	56	4	4	1	21.78	989	0.011	3791.34	2	45
44637	2	9.28	4.55	0.922	51.4	1	63	4	2	2	22.99	1605	0.019	2691.05	1	59
45171	2	16.92	8.87	0.682	51.4	1	61	3	4	2	25.06	1195	0.042	12202	2	70
48193	1	19.13	12.63	1.574	51.4	1	80	3	3	2	28.7	1845	0.011	4443.97	1	59
48453	2	20.37	4.81	0.582	51.4	2	69	3	2	2	29.47	2192	0.098	16486.9	2	61
48504	2	7.58	8.9	0.501	51.4	2	70	3	2	1	20.78	1382	414	6719.17	2	63
49641	2	17.14	13.92	1.633	51.4	1	68	3	5	1	29.22	1870	0.043	14529.9	2	67
32416	1	22.84	4.45	0.613	51.5	1	83	3	1	2	28.04	1067	0.041	1544.95	2	50
34502	2	11.31	8.17	1.432	51.5	2	56	3	5	2	20.14	1469		37606.8	2	49
37492	1	7.47	11.52	0.423	51.5	1	75	4	1	1	52.02	923	0.076	1600.34	1	55
42449	2	24.98	7.53	1.701	51.5	1	80	3	1	2	23.75	2586	0.079	5022.22	1	59
21643	2	7.33	4.88	0.581	51.6	2	62	1	1	2	31.96	1084	1.64	952.346	1	38
22477	1	8.97	6.23	0.837	51.6	2	75	3	3	2	28.71	1391	0.04	8681.76	2	30
23163	2	8.49	5.26	1.039	51.6	2	84	3	4	2	25.72	1377	0.021	3328.54	2	29
35827	2	8.96	4	0.829	51.6	1	53	4	2	2	17.1	1229	0.875	16079.6	2	44
49150	1	21.34	16.48	1.015	51.6	2	61	3	3	1	25.94	1322	83.6	14086	1	67
21228	2	11.16	7.06	1.349	51.7	2	63	5	4	2	18.61	1222	0.086	20462.9	1	43
22177	2	18.5	5.39	0.873	51.7	1	83	3	2	2	24.95	1668	0.109	4678.2	2	35
31808	1	4.82	4.14	0.365	51.7	1	79	3	5	2	21.53	830	1.71	2946.94	1	56
32113	2	6.41	5.56	0.874	51.7	2	62	1	2	2	32.89	1448	0.011	770.136	2	58
43469	2	5.64	7.19	0.922	51.7	1	78	3	3	2	29.49	2391	0.011	2583.5	1	60
45343	2	7.09	5.84	1.144	51.7	1	78	3	5	2	29.97	1148	0.068	14105.3	1	69
47389	2	9.16	5.52	0.992	51.7	1	60	4	3	2	22.48	1495	0.018	2734.57	1	68
10663	2	10.02	8.95	0.764	51.8	2	56	3	2	1	45.92	916	39.7	12198.7	1	23
17145	2	9.23	6.37	1.343	51.8	1	73	3	5	2	26.98	1698	0.011	13370.5	2	19
17922	2	8.54	3.75	0.535	51.8	2	64	3	3	2	18.95	1008	0.025	6529.42	1	22
25879	2	7.31	4.17	0.595	51.8	2	62	4	4	2	27.66	1286	154	7073.38	1	36
37105	2	15.49	4.78	1.082	51.8	2	56	3	5	2	21.84	1166	0.011	15334.5	1	54
37498	2	16.12	6.23	0.475	51.8	2	85	4	1	2		1373	516	7091.91	2	51
37653	1	10.95	7.66	0.714	51.8	2	82	3	4	1	27.27	1924	0.018	6177.77	2	47
23413	1	14.68	6.74	1.093	51.9	2	78	3	4	2	29.48	1690	0.116	5561.6	2	30
24642	1	16.93	10.12	1.048	51.9	2	85	3	3	2	24.84	1230	0.149	4433.73	2	31
25665	1	8.23	7.58	0.76	51.9	2	85	3	3	2	26.65	1429	0.011	5212.89	1	31
34574	2	7.56	6.85	1.001	51.9	2	57	3	4	2	35.64	1591	284	6886.15	2	50
38559	2	12.42	6.51	1.379	51.9	2	67	3	4	2	57.31	1488	0.011	30971.5	2	54
39323	2	14.36	7.59	1.141	51.9	1	63	3	5	2	29.34	1822	0.031	19239.7	1	45
44361	1	12.72	9.08	1.167	51.9	2	75	3	5	2	29.44	1606	0.062	7946.6	1	67
46232	2	11.53	10.94	0.914	51.9	1	58	2	3	2	35.4	2939	0.011	7963.18	2	65
46531	2	7.34	4.24	0.679	51.9	1	69	4	2	1	38.38	1127	0.967	1561.75	1	59
25656	2	8.44	2.61	0.646	52	1	68	1	1	2	24.65	1000	6.02	1592.15	1	40
28666	2	9.19	5.73	0.682	52	1	75	1	1	2	26.3	1272	0.021	799.428	1	43
33086	2	6.56	2.78	0.547	52	1	56	3	5	2	26.52	2367	0.011	33475.4	1	55
33316	1	6.05	21.03	1.412	52	1	74	3	3	2	24.87	1243	0.155	4015.55	2	53
33959	1	5.84	7.59	0.799	52	2	81	3	2	2	25.7	1282	0.186	7100.68	1	47
40518	2	9.86	13.4	1.103	52	2	62	3	3	2	47.88	2400	0.07	8672.29	1	44
50833	2	5.69	4.52	0.668	52	2	60	2	1	1	31.72	1114	0.407	1198.79	2	61
20554	1	4.07	4.56	0.735	52.1	2	72	3	2	2	30.45	837	268	7259.43	1	21
25180	2	9.56	8.71	0.791	52.1	2	79	1	1	2	28.16	1043	0.011	1452.94	1	34
48917	2	19.65	11.29	0.585	52.1	1	80	3	2	2	31.67	1633	145	2327.6	1	65
10326	2	34.96	5.1	0.98	52.2	2	72	1	1	1	28.92	1651	0.011	917.373	1	22
29808	2	9.69	9.03	0.78	52.2	1	57	3	4	2	34.2	1351	0.026	6549.41	2	35
31947	2	5.74	5.25	0.685	52.2	2	61	4	2	2	35.55	1195	0.184	3530.27	2	49
39126	2	43.33	36.92	1.517	52.2	1	66	3	3	2	31.55	2169	0.011	17951.1	2	44
39553	2	10.06	5.34	0.513	52.2	2	70	3	4	2	31.79	1060	0.011	7878.58	2	44
40165	1	5.92	9.05	0.717	52.2	2	85	3	5	1	26.65	1045	0.011	11575.4	2	46
40369	2	6.73	5.33	0.508	52.2	1	67	3	3	2	21.73	1449	0.011	17951.1	2	44
46392	1	7.36	4.23	0.741	52.2	1	69	2	1	1	23.94	969	367	1308.79	1	72
50109	2	7.86	7.75	0.757	52.2	1	75	3	1	2	27.27	1353	0.122	1851.55	1	59
13290	2	10.58	6.27	0.946	52.3	1	57	3	3	2	29.53	2116	825	11137.7	1	26
30249	2	13.97	10.73	0.914	52.3	1	68	3	5	2	29.75	2836	0.053	11084.9	2	37
39459	1	6.38	4.08	0.919	52.3	1	81	3	1	2	26.45	1315	0.023	8947.73	2	48
41053	1	26.18	7.12	0.746	52.3	1	75	3	1	1	27.63	1879	3.27	5925.18	1	45
45488	1	8.9	8.22	0.929	52.3	2	80	2	1	2	25.85	1095	0.011	1447.17	1	62
47432	2	4.84	5.31	0.642	52.3	2	58	3	5	2	30.72	691	0.026	20178.3	2	60
39034	1	7.87	5.86	0.556	52.4	1	80	3	4	2	28.38	1195	0.017	8062.98	2	47
40575	1	20.35	5.57	0.821	52.4	1	85	3	3	2	28.48	1310	0.036	3533.42	2	44
43743	2	14.74	6.24	0.647	52.4	1	80	3	5	1	29.36	1303	0.044	6300.27	1	63
45009	2	15.17	6.94	0.637	52.4	2	60	3	2	1	30.39	1006	3.98	6599.37	1	67
47186	2	7.29	4.98	0.655	52.4	2	60	4	5	2	23.3	1020	758	2685.33	1	68
11426	2	4.79	6.4	0.325	52.5	1	75	4	1	2	25.45	1159	0.688	1486.63	1	16
33207	2	4.86	5.42	0.637	52.5	2	62	3	2	2	21.22	1646	331	49871.4	1	56
48616	2	4.47	5.51	0.761	52.5	2	62	3	4	2	26.37	1249	0.011	5756.68	2	63
25526	2	8.31	2.75	0.502	52.6	2	64	3	1	2	26.25	1137	0.011	31608.5	2	34
27521	2	6.57	6.4	0.694	52.6	2	66	3	2	1	34.25	1029	0.058	5589.94	2	35
27910	1	9.54	9.24	0.775	52.6	2	71	3	2	1	32.28	1358	0.023	23170.7	2	34
28769	1	6.82	5.67	0.852	52.6	2	77	3	2	2	33.14	1187	0.13	8704.04	1	30
29028	2	5	9.3	0.286	52.6	2	55	4	4	2	24.74	1008	0.011	14975	1	39
31019	2	6.13	4.08	0.862	52.6	2	71	1	1	1	52.36	1178	0.011	1175.4	2	40
43690	1	3.85	4.19	0.872	52.6	1	77	4	1	1	42.42	994		2274.5	2	67
50531	1	10.77	8.65	0.812	52.6	1	80	3	4	2	26.38	1227	0.019	3748.76	1	60
10901	1	8.18	9.24	0.708	52.7	1	72	4	4	2	20.06	1048	228	2209.57	2	28
12834	2	7.34	5.21	0.877	52.7	2	70	1	1	2	27.56	1482	0.011	2439.28	2	22
20872	2	9.8	5.18	0.84	52.7	2	66	3	5	2	23.09	1377	0.021	15960.4	1	19
28102	2	7.68	7.3	0.961	52.7	2	77	3	2	1	30.98	1121	0.056	12435.6	1	42
34040	1	11.98	5.14	0.613	52.7	2	84	3	4	2	27.21	923	0.011	15701	2	44
41575	2	15.42	5.21	0.509	52.7	1	76	1	1	2	27.77	1448	0.018	1767.35	2	71
41783	1	8.63	5.31	0.837	52.7	2	80	3	5	2	26.65	1544	0.094	7840.45	1	67
44255	2	16.61	6.83	1.121	52.7	2	60	3	5	2	30.94	1527	0.015	20686.4	2	63
47972	1	7.15	8.29	0.618	52.7	2	67	3	2	2	29.64	749	0.074	8834.16	2	59
49847	1	9.58	11.75	0.786	52.7	1	72	3	1	2	27.96	1443	142	2490.26	2	59
50332	2	11.4	5.64	0.591	52.7	1	60	4	3	2	22.36	1379	371	3291.06	1	59
50696	2	6.7	3.08	0.647	52.7	1	70	4	4	2	24.04	759	0.048	1732.73	1	64
27129	2	10.01	9.48	0.931	52.8	2	72	3	4	2	28.1	1910	0.011	9924.19	2	30
30215	1	13.49	8.65	1.036	52.8	1	71	3	2	1	26.84	1145	0.011	6808.61	1	39
43593	2	7.82	7.18	1.634	52.8	1	58	4	3	2	28.05	1939	0.011	3352.67	2	71
46217	2	14.95	6.33	0.855	52.8	2	55	1	4	2	34.29	1575	92.8	7280.69	1	66
47210	2	16.49	7.36	0.641	52.8	2	80	4	5	1	29.68	963	0.084	3415.33	1	67
50052	2	7.66	10.59	0.476	52.8	2	64	3	4	2	32.02	1637	0.124	4410.89	1	67
10133	1	48.24	42.11	0.781	52.9	1	84	3	4	2	28.34	1372	0.035	6556.26	2	16
12092	2	15.34	8.71	1.221	52.9	2	70	3	4	2	22.47	1361	0.011	6674.17	1	14
23116	1	19.62	15.46	0.66	52.9	2	81	3	4	2	27.66	1064	0.034	4498.75	1	41
28836	2	15.19	7.09	1.193	52.9	2	60	4	5	2	25.38	2484	0.016	3055.75	1	36
40545	1	20.67	11.3	1.277	52.9	2	78	3	4	2	19.91	1241	0.049	17000.2	1	53
45252	1	10.18	6.18	0.917	52.9	2	80	3	2	2	19.38	927	0.011	13067.4	2	67
45298	2	8.76	5.39	1.161	52.9	2	67	3	2	2	32.24	1310	0.07	10143.7	1	61
46372	2	13.44	11.57	1.047	52.9	2	62	3	4	2	24.24	1345	0.016	10278.8	2	74
46452	2	8.27	4.69	0.769	52.9	1	67	3	3	2	24.86	1190	0.033	4920.49	2	62
51395	2	7.41	4.47	0.688	52.9	2	56	4	5	1	36.54	921	87.7	4198.95	1	64
12510	2	4.89	5.14	0.527	53	2	65	3	4	2	23.26	968	0.035	8636.96	1	21
16423	2	9.98	6.71	1.076	53	2	58	4	2	2	42.32	1511	0.011	6743.97	2	18
25707	1	6.25	4.88	0.423	53	2	66	4	1	2	23.88	916	0.021	2331.59	2	36
28253	1	27.52	21.48	0.517	53	2	85	3	2	2	25.75	967	0.042	9242.56	1	30
41526	2	14.48	6.94	0.698	53	2	64	3	3	2	25.84	1601	0.037	25541.4	2	67
16497	2	7.3	7.96	0.636	53.1	1	74	3	1	2	35.82	1301	0.018	5549.34	2	23
28031	2	3.42	2.59	0.319	53.1	1	61	4	4	1	33.94	549	146	2427.1	1	30
30044	2	7.2	5.96	0.836	53.1	1	85	3	3	2	27.88	1825	0.011	2001.55	1	37
36875	1	14.91	5.19	0.909	53.1	2	74	4	4	1	37.19	2529	0.011	3173.58	2	52
43682	2	12.33	7.51	0.688	53.1	2	80	3	3	2	29.83	1295	0.029	5661.68	2	63
45640	1	6.09	5.42	0.73	53.1	2	73	4	3	2	30.83	1077	0.034	3344.5	2	64
46954	2	6.35	3.41	0.796	53.1	2	54	4	4	2	37.11	1324	0.011	5388.74	2	65
49900	2	9.42	4.55	0.884	53.1	1	80	3	5	2	24.43	1350	27.9	5830.56	1	68
14598	1	17.88	4.99	1.671	53.2	2	85	3	1	2	29.52	1976	0.027	6697.79	2	17
30455	2	9	11.03	1.103	53.2	2	63	3	5	2	25.81	1462	0.011	23719.1	2	30
46138	2	4.6	5.9	0.65	53.2	2	60	3	2	1	31.01	852	0.038	3873.52	1	62
47366	2	9.74	5.81	0.527	53.2	2	52	4	4	2	32.53	1965	0.027	3603.63	2	71
49659	2	8.94	4.64	0.681	53.2	2	74	3	1	1	27.22	1058	389	11003	2	59
10377	2	4.96	3.95	0.529	53.3	2	66	3	5	1	28.66	404	0.026	20331.2	1	21
12916	1	9.99	10.57	1.377	53.3	2	57	3	4	2	40.36	1910		13124.1	2	23
13849	2	16.98	12.68	1.111	53.3	1	78	4	2	2		1284	0.064	10858.7	2	18
27279	1	9.03	8.18	1.015	53.3	2	74	3	2	1	27.44	1309		10994	1	39
37460	1	12.24	5.81	0.993	53.3	2	79	1	3	2	25.32	2081	193	1953.82	2	57
47872	2	8.94	7.51	0.99	53.3	2	72	4	4	2	32.06	1278	0.419	3019.26	1	68
14474	1	4.57	5.25	0.912	53.4	1	85	3	4	2	24.8	1169	0.092	2644.36	1	19
23473	2	5.47	3.56	0.363	53.4	1	71	3	3	1	27.38	848	0.171	7636.04	2	36
27188	2	11.41	4.59	0.708	53.4	2	68	4	4	1	36.52	1154	0.025	3348.03	1	39
36227	2	10.78	7.46	0.915	53.4	1	62	4	3	2	29.89	1300	0.04	2387.95	1	55
40765	2	2.83	2.31	0.338	53.4	2	59	3	5	2	18.89	726	0.023	32416	1	48
50187	2	15.81	7.67	1.706	53.4	2	60	2	1	2	31.53	2226	0.042	1923.9	2	61
16427	2	7.74	5.38	0.565	53.5	2	66	4	2	1	29.32	1097		3637.97	1	14
17695	2	6.01	5.11	0.636	53.5	1	64	1	3	2	33.69	1435	0.022	2164.22	2	23
28562	2	13.49	7.02	0.495	53.5	1	64	3	1	2		816	0.3	5759.55	2	34
28742	2	6.05	5.03	0.611	53.5	2	61	1	5	2	28.98	842	0.018	1066.61	2	36
30959	2	8.35	3.66	1.096	53.5	1	55	1	1	2	36.75	1302	0.376	2512.19	2	42
37330	2	12.8	8.24	1.58	53.5	2	68	3	4	2	20.17	1343	0.259	31111.1	1	50
42079	1	6.06	5.29	0.645	53.5	1	80	3	5	2	20.71	1441	0.051	4657.75	1	65
15723	1	5.78	3.83	0.321	53.6	2	64	4	2	1	34.41	775	455	2774.23	1	21
18894	2	10.58	7.1	0.644	53.6	2	61	3	5	2	31.84	1187	0.011	15164.6	2	21
22009	1	12.95	4.7	1.18	53.6	2	77	3	4	2	32.15	1310	0.052	7177.09	1	30
22096	1	13.08	4.67	1.301	53.6	1	65	5	3	1	37.17	2270	0.011	7373.83	2	34
22406	2	6.7	4.19	0.654	53.7	1	69	4	3	2	27.77	822	74.7	3314.43	2	41
24876	2	6.92	4.53	0.59	53.7	1	58	1	2	2	34.38	1286	0.011	11582.6	1	34
44522	1	15.7	9.06	0.966	53.7	2	72	4	3	1	34.85	1284	0.011	5628.98	2	70
44731	2	8.7	5.92	0.926	53.7	2	60	2	4	2	29.95	1087	0.011	2452.93	2	73
49419	1	11.45	4.92	0.972	53.7	2	70	1	1	2	37.35	1117	0.598	1714.99	1	66
50690	2	7.53	6.35	0.961	53.7	1	56	2	3	2	23.26	1164	17.1	2305.28	1	72
10517	2	10.31	11.24	1.526	53.8	2	63	4	3	2	36.74	1912	0.099	5095.8	1	20
19142	2	9.49	4.46	0.842	53.8	2	72	3	4	2	21.23	1140	0.017	5676.22	1	22
28709	2	7.02	9.64	1.151	53.8	2	59	1	1	1	42.44	1264	0.134	4341.27	1	34
35535	2	15.59	11.1	1.979	53.8	2	85	3	5	2	21.82	1679	0.011	9597.37	1	57
47026	1	9.33	6.41	0.643	53.8	2	80	3	5	2	32.33	1246	0.011	9668.35	1	60
48272	1	12.04	8.78	0.625	53.8	2	70	3	3	2	18.53	1859	203	5238	2	59
51572	2	7.03	5.5	0.918	53.8	2	77	3	3	1	32.46	1335	0.011	6764.59	2	61
25561	2	6.52	2.48	0.577	53.9	1	68	1	2	1	25.59	777	0.022	1068.94	2	40
28829	1	5.59	3.1	0.352	53.9	2	83	3	2	1	26.14	962	0.099	4962.65	2	34
29742	1	6.54	5.77	0.43	53.9	2	80	3	3	2	23.8	686	0.018	5897.71	1	31
30148	2	5.15	4.3	0.507	53.9	2	57	2	1	2	23.97	1091	1.43	17701.1	2	43
40358	2	17.09	3.6	1.173	53.9	2	63	3	4	2	30.17	1210	0.027	9723.3	2	44
46170	2	15.97	13.38	0.524	53.9	2	59	3	3	2	33.35	1109	0.118	3884.81	1	64
47388	2	8.72	9.82	0.701	53.9	2	63	1	1	1	27.57	1376	344	865.921	1	74
12742	1	14.06	4.37	0.728	54	2	85	3	3	2		1483	74.1	2822.44	1	23
26484	2	6.91	5.46	0.975	54	2	60	4	5	2	25.91	1333		1446.74	2	29
27462	2	4.86	3.2	0.494	54	2	85	3	1	2	30.38	993	0.055	7864.38	1	32
28403	2	22.54	11.7	1.458	54	2	57	3	5	2	26.03	2088	0.011	16121.8	1	40
29577	2	19.05	18.78	1.482	54	2	68	1	2	2	34.49	1185	0.02	862.306	1	34
33320	1	9.75	5.67	0.696	54	2	85	4	2	1	23.64	1221	447	3181.64	2	58
45309	2	13.3	8.01	0.826	54	2	62	1	2	1	29.57	1207	0.036	3001.82	1	60
46586	1	10.42	10.03	1.397	54	2	63	5	3	2	24.31	2199		17094.2	2	70
46786	2	5.3	3.83	0.557	54	1	76	1	2	1	31.03	886		1295.91	1	60
50466	2	5.05	2.28	0.424	54	1	64	4	4	1	37.64	1152	0.021	1582.93	1	68
16005	1	15.67	14.14	0.404	54.1	2	82	3	3	2	24.69	848	0.011	3811.11	2	19
19292	2	7.2	4.33	0.522	54.1	2	61	3	2	1	33.26	874	0.179	6429.42	2	20
21782	2	5.83	4.1	0.456	54.1	2	68	1	1	2	22.49	1170	0.011	952.762	1	39
34514	2	5.16	5.96	0.689	54.1	1	63	3	5	2	28.19	1531	258	6712.37	1	46
35963	2	8.68	6.49	0.645	54.1	2	74	1	1	2	25.09	788	0.011	2694.25	2	54
37928	1	7.37	3.53	0.614	54.1	2	76	4	1	2	29.84	1015	0.059	6186.79	2	46
45496	2	8.92	8.94	0.861	54.1	2	67	3	4	2	26.2	1364	0.046	18054	2	63
50294	2	10.33	9.35	0.607	54.1	2	58	3	3	2	18.5	1716	460	38873.7	1	63
14307	2	4.61	2.69	0.327	54.2	1	59	3	5	2	28.65	483	0.011	11506.2	1	22
21484	2	10.72	20.06	1.064	54.2	1	55	4	4	2	29.45	1992	0.011	6613.84	2	37
27429	2	11.22	2.9	0.438	54.2	2	72	4	5	2	42.58	875	388	6668.62	1	36
29717	2	6.03	4.86	0.591	54.2	2	74	3	2	1	36.3	894	0.011	19648.2	1	39
31154	2	11.21	8.3	1.445	54.2	1	62	4	3	2	26.98	1929	338	1204.87	1	45
33971	2	8.51	11.05	1.333	54.2	2	64	3	3	2	34.77	1393	190	14385	2	46
46867	2	3.94	4.66	0.465	54.2	1	72	4	3	2	30.21	1213	0.192	3235.53	2	66
17890	2	6.35	4.21	0.866	54.3	2	68	3	4	2	32.05	863	0.032	13189	2	20
18223	2	6.99	7.88	1.136	54.3	2	77	3	4	2	29.43	1057	0.011	8115.39	2	20
29803	2	17.48	9.66	0.519	54.3	1	75	3	2	2	26.38	898	32.4	2762.4	2	29
34060	2	8.52	7.02	1.421	54.3	2	70	1	4	2	36.23	2334	0.076	2472.54	1	54
36057	2	8.81	5.4	0.855	54.3	1	58	1	3	2	31.6	1293	190	11687.3	1	55
44082	1	16.32	5.15	0.684	54.3	1	80	3	5	2	31.69	1893	0.037	2808.02	1	60
14646	2	7.27	5.95	0.532	54.4	2	85	3	3	1	22.16	984	0.262	3874.62	2	23
17135	2	5.01	6.88	0.542	54.4	1	61	4	1	2	26.86	1159	398	964.537	1	27
18224	2	7.12	7.48	0.605	54.4	1	72	1	1	1	25.65	934	0.011	900.35	2	28
22109	2	17.27	9.24	1.772	54.4	2	70	3	3	2	24.25	2375	0.102	13488.2	2	34
28603	2	7.91	6.22	0.862	54.4	1	61	3	3	2	29.43	1688	0.896	8727.01	2	32
34673	2	9.16	5.14	0.888	54.4	2	58	4	2	1	31.56	1311	325	6153.52	1	52
37388	2	13.08	8.92	1.855	54.4	1	73	3	5	1	26.5	2344	0.074	6330.87	2	50
46098	2	12.29	14.24	1.083	54.4	1	65	3	2	1	25.56	1089	846	4179.6	2	59
46512	2	5.7	5.86	0.557	54.4	2	62	4	4	2	21.63	1072		5108.06	2	67
20994	2	7.61	4.32	0.745	54.5	2	67	4	4	2	30.3	1662	250	3606.02	2	26
29227	2	8.5	6.27	0.453	54.5	1	71	4	1	2	20.99	1541	0.054	4090.87	2	35
40422	2	10.92	6.55	0.342	54.5	2	61	1	3	1	30.18	867	0.015	4246.56	1	55
44200	1	9.06	6.56	1.725	54.5	1	80	3	5	2	25.56	1468	0.011	4266.26	2	71
50102	2	4.68	5.86	0.678	54.5	1	72	4	2	1	29.92	1275	0.374	2787.89	2	70
12807	2	8.85	5.63	0.653	54.6	1	78	4	1	2	29.93	1150	0.802	2200.32	1	25
19406	2	9.12	6.02	0.625	54.6	1	57	4	4	2	26.05	1558	274	10054.5	1	16
27960	2	8.67	6.08	1.569	54.6	2	72	3	5	2	22.5	1305	0.011	20721.5	1	31
29256	2	6.39	7.27	0.557	54.6	2	55	3	4	2	27.36	1092	265	39160.2	1	33
41105	2	10.98	11.11	1.251	54.6	2	66	4	5	2	40.19	1525	0.011	6847.02	2	54
46123	2	4.28	8.08	0.661	54.6	1	69	3	1	1	41.57	1003	0.03	3211.62	1	62
19426	2	8.3	6.9	0.611	54.7	2	63	3	3	2	31.05	1129	38.6	9724.34	2	17
22679	2	7.67	8.41	0.611	54.7	1	69	3	2	2	21.26	1420	0.019	12991.6	1	29
23980	2	8.2	7.78	0.898	54.7	2	81	3	4	2	36.76	1117	0.273	6144.76	1	42
24515	2	9.09	4.39	1.166	54.7	2	69	3	4	2	31.89	1537	0.011	3698.49	1	33
30957	2	9.63	12.22	0.564	54.7	1	72	1	1	2	27.47	1480	0.042	1055.61	1	34
32938	2	11.92	6.23	1.028	54.7	2	79	3	3	2	26.52	1687	2.19	14686.8	1	49
35485	1	16.68	6.91	1.088	54.7	2	85	3	1	2	26.17	1980	0.057	9688.5	2	46
50031	2	7.57	10.26	0.617	54.7	2	78	2	1	2	33.08	1030	0.024	5128.53	1	72
15340	2	7.64	3.91	0.759	54.8	2	59	3	2	2	20.26	1681	239	11984.8	1	14
17315	1	11.94	10.3	1.585	54.8	2	74	3	5	2	34.05	1837	0.011	14759.8	1	15
26718	2	6.02	5.08	0.365	54.8	1	76	1	1	2	25.51	850		1055.61	1	34
43025	1	7.09	4.74	0.874	54.8	2	80	3	4	2	25.11	1330	0.155	7904.24	1	63
50792	1	4.78	4.89	0.64	54.8	2	80	4	1	2	29.38	1095	0.011	4038.11	1	62
21407	2	10.07	6.78	0.81	54.9	2	78	4	4	1	32.73	1324	0.041	6510.81	2	29
25955	2	13.91	5.66	0.771	54.9	2	58	4	2	2	29.67	1316	0.554	5669.35	2	42
31323	2	7.79	5.03	0.79	54.9	1	83	3	1	2	25.6	1226	0.378	10235.5	1	54
37665	2	16.71	12.25	0.764	54.9	2	76	3	5	2	22.98	1367	0.053	8129.55	2	49
44391	2	12.42	5.27	0.46	54.9	2	60	4	3	2	51.17	868		1965.88	1	68
46149	2	6.59	4.44	0.691	54.9	1	80	3	3	2	25.53	925	0.015	7907.97	2	60
46593	2	7.16	5.43	0.867	54.9	2	52	4	3	2	28.58	1240		13709.5	2	67
14546	2	5.05	3.7	0.563	55	2	74	3	4	2	26.5	960	0.011	6210.75	1	19
20889	2	7.75	8.22	0.695	55	1	61	3	1	1	32.67	1003	0.838	11411.1	2	20
26616	2	15.88	5.9	1.098	55	1	62	3	3	2	24.66	1635	396	21437.8	1	32
29714	2	12.31	5.19	0.643	55	2	72	4	1	1	34.12	938	367	2250.29	2	41
49619	1	9.94	5.88	0.404	55	2	73	3	4	2	33.24	926	0.547	6947.19	2	61
15712	2	11.33	10.25	1.088	55.1	1	77	3	3	2	29.56	1748	0.011	9801.49	1	22
18114	2	31.34	3.75	0.572	55.1	2	72	3	3	2	19	1042	0.448	7003.57	1	18
24277	2	25.29	10.68	2.226	55.1	1	62	3	2	2	28	3092	39.7	5858.91	2	34
39389	2	12.36	5.29	0.867	55.1	1	78	3	4	2	24.7	1273	0.02	11242.6	2	51
42664	2	5.65	5.73	0.633	55.1	1	53	4	4	2	22.24	1574	236	3027.48	1	68
47272	2	8.86	5.45	1.061	55.1	1	78	3	5	2	26.77	1442	0.015	11218	2	64
47304	2	6.36	7.3	0.793	55.1	2	56	3	4	1	32.8	1528	223	3949.74	2	60
12322	2	6.29	7.69	0.385	55.2	2	57	4	4	2	41.94	1725	0.025	2742.48	1	18
15327	2	12.31	5.52	0.607	55.2	2	76	3	3	2	36.83	1077	0.027	14600.7	2	19
22917	2	18.07	10.49	0.764	55.2	1	84	3	4	1	26.3	1379	0.011	4318.44	1	35
26842	2	7.69	7.71	0.438	55.2	2	61	4	2	1	44.82	1202	1.07	2331.59	2	36
38119	2	12.03	10.98	1.785	55.2	2	81	4	2	2	23.64	1997	0.025	3739.45	1	49
43798	2	14.71	7.73	1.001	55.2	1	56	4	2	2	16.84	1310		7553.64	1	64
46951	2	12.8	4.09	1.856	55.2	1	78	3	1	2	15.25	1641	252	10291.9	2	60
51616	2	10.32	5.4	0.74	55.2	1	60	3	3	1	42.4	1777	49.4	24106.2	2	62
12828	2	10.53	5.48	0.91	55.3	1	70	3	1	2	27.99	1456	293	4862.27	2	20
13746	2	25.48	13.04	1.157	55.3	1	80	3	4	2	25.61	1731	0.038	2684.68	1	17
22781	1	16.37	14.44	1.764	55.3	1	73	3	1	2	18.25	1561	162	13143.7	1	41
31367	1	5.35	3.65	0.617	55.3	2	85	3	3	2	18.99	607	0.011	10768.9	2	53
33552	2	7.31	3.23	0.828	55.3	2	67	5	1	2	21.8	776	0.039	13160.2	1	54
36379	2	16.54	9.59	1.141	55.3	2	58	1	3	2	24.38	1165	0.016	5266.93	1	54
45146	1	9.84	8.59	1.17	55.3	1	80	3	1	2	27.24	1446	0.046	4576.91	2	63
47070	1	14.69	10.51	1.155	55.3	2	80	4	4	1	33.05	1351	0.14	3675.13	2	66
51006	1	9.8	6.36	1.854	55.3	2	61	1	2	2	29.18	1467	0.011	2190.84	2	73
18064	1	11.12	3.88	1.088	55.4	2	81	3	2	1	37.15	1235	0.024	4310.7	1	20
28696	2	5.85	7.84	0.583	55.4	1	57	3	3	2	27.57	1949	652	55631.6	2	32
37751	2	11.18	6.42	1.167	55.4	1	55	3	4	2	23.07	1975	21.4	41575.4	1	50
46822	2	11.59	5.64	0.682	55.4	2	80	3	3	1	28.3	885	0.04	8025.29	1	61
49077	2	9.12	7.92	0.749	55.4	1	79	4	1	2	27.07	1389	0.131	4654.01	1	59
13735	1	8.55	3.83	0.925	55.5	1	85	1	5	2	27.66	2144	0.011	1271.16	1	17
17631	1	12.21	10.37	0.829	55.5	2	85	3	2	2	33.99	1616	0.011	7693.85	1	19
17843	2	8.46	7.42	0.635	55.5	2	67	5	3	2	26.34	1040	329	23577.4	2	24
39490	2	6.51	2.15	0.651	55.5	1	69	3	1	1	25.97	826	0.042	6876.01	2	49
41825	2	10.27	4.77	0.902	55.5	2	63	4	5	2	24.65	1010	531	1777.64	1	63
42908	1	8.93	9.58	0.99	55.5	2	80	3	4	2	27.38	1593	0.032	7600.46	2	60
37432	1	7.26	5.13	0.976	55.6	2	71	3	3	2	28.8	1633	0.011	9803.96	1	54
45401	2	6.01	4.8	0.802	55.6	2	56	3	3	2	22.43	1161	173	4127.5	1	67
47623	2	13.63	6.56	2.433	55.6	1	55	4	4	2	25.75	2109	0.035	2102.99	1	70
13912	2	10.4	7.45	0.893	55.7	2	52	4	5	2	55.4	2446	247	8628.99	2	14
14276	2	8.32	5.86	0.799	55.7	1	67	3	5	2	21.56	1845	0.011	21508.4	2	19
27423	2	7.14	6.38	0.852	55.7	2	82	3	1	2	22.13	1480	0.025	10143.9	2	34
31348	2	14.97	5.28	0.592	55.7	1	62	4	2	2	31.16	1136	169	1582.1	1	49
32591	2	13.45	10.52	1.321	55.7	2	52	4	2	2	41.25	1540	0.026	6808.31	1	51
34281	2	14.64	12.08	1.376	55.7	1	83	4	3	2	21.56	1509	0.1	2099.95	1	49
36112	2	5.88	3.59	0.722	55.7	2	74	3	3	1	31.62	777	129	19873	1	44
46078	1	6.38	8.04	0.689	55.7	2	80	3	5	2		1034	0.088	8105.82	1	60
20425	1	9.06	5.06	0.778	55.8	2	67	3	4	1	33.92	904	0.096	5137.47	1	16
42590	2	6.17	6.51	1.397	55.8	1	59	3	4	1	42.61	1194	273	13338.1	1	71
45535	2	6.34	5.2	0.848	55.8	2	76	3	1	2	32.53	1340	2.13	7677.77	2	59
48401	2	17.51	8.46	2.104	55.8	2	60	3	4	2	28.07	1492	0.011	17173	2	61

## Sheet: Sheet2
SEQN	cataract	iron	zinc	copper	sele	gender	years	race	education	diabetes	BMI	calore	cottine	weight	SDMVPSU	SDMVSTRA
12467	2	21.31	8.75	1.273	55.9	1	84	3	3	2	25.89	1557	0.011	4172.78	1	23
14868	2	12.43	8.51	1.415	55.9	2	80	2	4	2	25.48	1511	0.119	3783.09	2	27
18401	2	9.06	6.38	0.731	55.9	2	63	3	3	2	23.92	1442	0.015	18808	2	23
29978	2	18.76	17.27	0.533	55.9	2	84	3	1	2	23.28	964	0.02	9283.8	2	32
36407	2	11.83	4.54	0.479	55.9	1	80	3	2	2	20.19	1374	0.011	4620.37	1	52
36838	2	9.98	9.9	1.32	55.9	1	69	3	3	2	25.44	1119	0.06	6255.01	1	49
36913	1	7.19	6.36	0.577	55.9	2	63	4	2	2	36.48	952		4420.67	1	52
42265	2	9.72	7.34	1.013	55.9	1	60	2	3	2	31.22	1645	0.078	1680.8	2	70
43767	2	12.18	12.03	0.921	55.9	2	67	3	4	2	21.02	1248	0.251	5628.62	1	59
43867	1	10.99	18.24	0.799	55.9	1	63	3	3	2	27.14	2032	10	3889.95	1	61
44601	2	20.56	9.66	0.72	55.9	2	60	4	2	2	36.61	1315	301	1662.56	1	62
45959	2	6.85	5.37	1.021	55.9	2	60	4	3	1	33.4	1405	599	3751.89	2	74
47793	2	9.42	7.29	0.953	55.9	1	56	1	4	1	33.03	1302	0.071	1406.97	2	70
36283	1	12.57	8.32	1.109	56	2	85	4	2	2		1640	0.055	2688.97	1	48
38156	2	8.22	6.69	1.269	56	2	55	3	5	2	34.79	1855	0.011	26960	2	44
46281	1	6.26	8.28	0.664	56	1	70	4	5	2	34.01	1277	0.066	5554.92	2	67
36986	2	14.52	8.14	0.745	56.1	2	50	4	2	2	38.56	1348	303	10766.8	1	49
49552	1	22.21	13.56	1.433	56.1	2	71	3	4	2	28.6	1465	54.7	11964	2	67
17633	2	12.4	6.31	1.193	56.2	2	68	1	4	1	24.58	1989	0.18	598.788	2	23
22219	2	7.57	8.96	0.806	56.2	1	61	3	2	2	30	1605	361	10311.2	2	36
36119	2	6.2	9.96	1.108	56.2	1	83	2	3	1	29.24	1115	0.011	1986.35	2	45
37389	2	3.74	5.05	0.293	56.2	1	71	3	2	2	23	739	338	6713.5	1	53
42632	2	7.66	7.56	0.764	56.2	2	65	3	4	2	27.38	1257	0.015	18003.5	1	60
13526	2	10.37	4.66	0.967	56.3	2	81	3	2	2	24.63	1367	0.179	3033.47	2	14
20347	2	14.43	11.73	1.832	56.3	1	59	3	4	2	26.66	1576	0.011	11650.8	1	19
30779	2	14.63	5.14	1.306	56.3	2	71	3	3	2	27.12	1356	0.042	9953.51	2	30
42037	2	25.64	14.78	1.123	56.3	1	75	3	5	1		1655	0.011	10658.7	1	61
43268	2	9.21	6.72	0.873	56.3	2	70	1	2	2	25.19	2087	184	4596.42	2	65
45756	2	13.97	4.44	0.942	56.3	2	66	3	5	2	18.11	1146	0.011	14145.8	2	70
45857	2	18.62	9.99	1.169	56.3	2	80	4	3	2	24.4	1452	0.604	2077.01	2	74
9980	2	11.74	8.12	0.665	56.4	2	85	3	2	2	38.64	1321	0.026	32143.9	1	23
17833	2	4.93	5.03	0.376	56.4	2	68	1	1	1	36.06	649	0.015	601.325	2	15
28327	1	16.41	11.66	1.422	56.4	1	85	3	4	2	19.68	1791	0.011	8720.3	1	29
33454	1	19.23	18.55	1.342	56.4	1	84	4	2	1	25.19	1535	1.63	3212.79	1	55
39016	2	4.05	4.48	0.552	56.4	1	55	4	3	2	24.1	1041	0.046	3290.82	2	56
45286	2	10.15	6.95	0.784	56.4	2	58	3	5	2	22.35	1613	0.022	13988	1	67
47601	1	10.52	9.76	0.744	56.4	2	80	3	5	2	27.44	1655	0.011	10547.5	2	66
48805	2	5.9	7.89	0.634	56.4	2	66	3	3	2	33.68	958	0.011	23829.9	1	60
49201	2	10	5.9	1.089	56.4	1	62	3	3	2	28.15	2152	0.425	16353.4	1	63
49882	1	8.53	9	0.771	56.4	2	80	3	3	1	30.97	1357	0.022	7162.71	2	59
10140	2	7.49	8.18	1.029	56.5	1	85	3	2	2	26.92	1130	361	4035.47	1	19
18036	2	19.13	10.78	0.968	56.5	1	57	4	5	2	21.44	1369	218	8074.79	1	19
19254	2	9.61	8.45	0.823	56.5	2	84	3	2	2	21.08	1122		8228.39	2	16
32268	2	26.87	10.79	0.974	56.5	1	65	3	3	2	37.1	1791	212	5295.81	2	46
33069	2	28.71	13.4	1.523	56.5	1	80	3	1	2	22.58	1690	0.016	4971.29	2	46
36205	2	16.7	7.79	1.222	56.5	2	85	1	1	1	42.8	1474	0.011	3122.55	2	58
36974	2	21.27	8.31	1.148	56.5	1	65	1	1	2	23.84	1532	0.034	391.409	1	55
37350	1	8.04	6.31	0.854	56.5	2	60	3	4	2	23.15	1057	244	8929.15	1	49
44104	2	6.23	3.31	0.896	56.5	2	80	3	4	2	32.07	1091	0.06	6037.13	1	63
45547	2	6.62	4.97	0.435	56.5	1	80	1	1	2	21.51	966	0.042	1531	1	73
47025	2	12.62	5.77	2.038	56.5	2	57	3	4	2	21.26	1623	0.011	4550.39	1	65
51515	2	14.43	13.92	0.811	56.5	2	55	3	3	2	20.29	1787	168	12559.8	1	59
10205	2	5.06	4.18	0.268	56.6	1	67	3	3	2	23.99	1010	209	13045.2	1	27
14319	1	8.87	5.34	0.877	56.6	2	81	3	2	1		1132		8552.72	1	14
26215	2	11.36	10.97	0.827	56.6	2	73	1	1	2	28.18	996	0.011	1494.45	2	38
40410	2	11.29	10.26	0.987	56.6	1	77	3	4	2	33.18	1402	122	6297.04	2	49
45018	2	8.82	5.27	0.776	56.6	1	71	4	2	2	25.86	1101	0.032	2285.4	1	62
49285	2	24.04	12.58	0.706	56.6	2	64	3	2	2	27.96	1528	0.011	20234.4	2	67
42769	1	15.74	13.85	0.914	56.7	2	73	3	4	2	26.7	1114	0.063	14023.7	2	62
50509	2	7.53	4.81	0.645	56.7	2	62	4	4	2	37.42	1276	0.048	1832.51	2	69
14455	1	12.65	15.52	0.709	56.8	2	80	3	3	1	31.31	1146	0.033	10129.9	2	16
34960	2	7.89	6.35	0.686	56.8	2	76	3	3	2	34.24	902	0.022	17283.2	2	46
42426	1	8.16	7.9	0.787	56.8	2	73	3	4	2	22.19	1607	0.015	10289.2	2	71
43748	1	13.74	7.07	1.076	56.8	2	80	3	2	2	30.43	1013	0.011	7998.13	2	59
44898	2	8.03	4.33	0.886	56.8	2	53	4	2	1	40.68	949		3505.07	1	72
46171	1	6.61	4.49	0.592	56.8	1	78	3	3	2	30.79	1083	0.011	7687.68	2	60
14595	2	6.2	5.97	0.897	56.9	2	67	3	4	2	25.76	1001	2.62	7675.55	1	26
16498	2	11.95	15.41	0.91	56.9	2	61	3	5	2	20.28	2096	194	6862.64	1	17
32941	2	7.05	7.84	0.496	56.9	2	56	1	4	2	36.31	729	9	2111.96	2	54
36442	2	17.11	12.81	2.519	56.9	1	65	4	1	2		2332	0.157	3618.02	2	52
42712	2	17.24	13.12	0.648	56.9	2	63	4	4	2	26.98	1029	0.011	2475.17	1	59
46812	2	9.5	7.06	1.3	56.9	2	58	3	5	2	33.33	1198	0.011	40352.6	1	65
49598	2	6.68	3.65	0.457	56.9	2	73	4	1	1	34.52	812	0.818	2901.95	1	59
50560	2	17.83	8.32	0.714	56.9	2	80	3	4	2	25.08	1491	0.03	10325.1	1	61
15073	2	8.67	6.78	1.069	57	2	70	4	3	2	35.01	1884	0.011	3764.07	1	16
15678	1	6.02	6.03	0.98	57	1	80	3	5	2	25.82	1325	274	2986.21	1	21
16319	1	7.61	6.31	0.609	57	1	80	3	4	2	25.13	1161	0.054	2675.12	1	19
20111	2	8.58	6.15	1.08	57	2	75	3	4	1	30.5	1431	0.397	12243.7	1	23
36333	1	11.63	6.23	0.841	57	2	79	3	3	2	22.58	1159	0.039	19831.6	2	44
40088	2	4.76	6.02	0.624	57	2	69	1	1	2	36.03	870	0.011	8283.7	2	55
42867	2	13.42	2.82	0.672	57	1	68	4	4	2	25.27	1151	266	1373.64	1	73
46243	2	13.14	10.76	1.142	57	1	62	3	4	2	21.72	1892	0.04	14547.9	1	67
15061	2	14.38	13.2	1.276	57.1	1	81	3	5	2	26.27	2038	0.011	2781.45	1	19
23608	2	22.36	12.19	4.129	57.1	2	66	3	5	2	20.89	1933	0.011	17312.1	1	43
28340	1	27.64	32.26	1.352	57.1	1	82	3	2	2	26.85	2109	81.1	2044.79	2	40
29615	2	6.83	13.76	0.399	57.1	1	55	3	4	2	30.61	966	109	46800.8	1	38
30467	1	19.24	11.46	1.675	57.1	1	74	1	1	2	24.09	1752	0.09	822.798	2	40
33247	2	7.09	4.96	1.226	57.1	2	55	3	5	2	27.34	1439	0.021	11143.3	2	56
42940	2	13.47	8.63	0.872	57.1	2	71	3	2	2	25.02	979	76.6	4964.64	1	61
45594	2	8.26	6.2	0.895	57.1	2	78	3	5	2	24.29	1329	0.016	7930.54	1	60
48047	2	9.49	7.32	0.957	57.1	2	56	5	4	2	32.77	2183	0.011	18667.6	1	69
15931	2	8.97	5.22	0.799	57.2	2	76	3	4	2	23.36	1330	0.011	15916	2	16
20196	1	11.97	7.06	1.389	57.2	2	61	3	2	2	31.16	2321	0.05	14541.6	2	23
27233	2	9.55	4.02	0.44	57.2	2	64	3	2	2	41.22	648	0.309	17299.9	2	34
34711	2	18.06	6.16	1.342	57.2	2	76	1	1	2	29.69	1682	0.011	2999	2	58
36788	1	9.86	4.76	0.683	57.2	1	85	5	5	2	28.58	932	0.055	3423.65	1	58
43366	2	13.92	7.86	0.62	57.2	2	61	1	1	2	32.79	975	0.044	2108.71	1	66
48429	2	9.46	4.85	0.911	57.2	2	73	4	2	1	32.34	1442		3751.97	2	67
48554	2	8.85	6.3	0.807	57.2	2	58	1	1	2	26.62	844	0.011	2367.29	2	65
51325	2	17.75	13.1	1.12	57.2	1	80	3	2	2	22.15	2331	0.086	4744.35	2	59
39193	2	22.1	8.48	1.089	57.3	2	83	4	2	2	29.26	1234	1.38	3992.87	2	48
49674	2	12.16	5.97	1.058	57.3	1	53	4	4	2	42.16	1867	0.025	5464.84	2	72
51606	2	8.25	4.6	0.756	57.3	2	76	3	4	2	18.79	1176	163	5981.08	1	60
17644	1	6.98	4.18	0.478	57.4	2	79	3	1	2	18.09	869	241	7318.73	2	20
24245	2	11.38	9.49	0.493	57.4	2	55	4	4	2	30.26	1865	0.011	6837.61	1	36
28280	1	11.99	8.52	1.046	57.4	2	76	3	2	2	23.77	1445	0.941	9501.02	1	29
31033	2	12.4	5.81	0.993	57.4	1	71	4	1	2	24.2	1502	243	1741.3	1	30
45003	2	6.25	12.65	1.49	57.4	1	80	3	3	2		1484	0.037	3634.51	2	63
21252	2	13.35	14.86	1.411	57.5	2	62	3	4	2	30.45	1317	206	5194.48	1	41
21468	2	6.25	2.96	0.506	57.5	1	85	3	4	2	29.14	732	0.011	4735.46	2	35
22884	2	43.32	20.69	0.992	57.5	2	55	3	5	2	34.14	1251	2.66	16835.5	1	29
24944	2	9.25	8.29	0.681	57.5	1	84	3	5	2	26.02	1627	0.51	4372.99	1	33
49323	1	5.24	5.73	0.755	57.5	2	73	4	2	1	38.85	1384	0.067	5571.55	2	68
50559	2	6.77	5.2	0.856	57.5	2	75	3	3	2	22.09	1167	97.1	11579.9	1	66
10907	2	15.98	8.19	0.844	57.6	1	77	3	4	2	28.7	1270	0.025	12215.4	2	24
17019	2	6.09	3.47	0.384	57.6	2	56	3	4	2	35.06	924	0.041	13331.5	2	24
17038	2	6.71	4.56	0.597	57.6	2	63	4	3	1	24.54	1171	0.035	4943.36	1	27
20041	1	10.62	6.17	1.07	57.6	2	71	3	4	2	28.71	1112	1.98	8849.07	1	17
20996	1	8.16	5.43	0.574	57.6	1	77	3	2	1		1163	0.049	4312.59	2	14
22323	2	10.77	8.2	1.065	57.6	1	63	3	5	2	23.74	1930	0.06	11242.5	1	34
23001	2	8.36	9.9	1.51	57.6	1	72	3	2	2	29.85	1483	0.011	8425.77	1	38
23476	2	7.9	6.69	0.752	57.7	2	80	1	1	1	33.6	942	0.17	1439.08	1	34
24854	1	9.16	3.5	0.841	57.7	2	85	4	1	2	31.62	886	0.011	4846.97	1	35
25880	2	13.45	3.55	0.626	57.7	2	60	1	2	1	29.36	1053	0.011	1984.13	1	34
26433	2	9.8	9.33	0.828	57.7	2	82	3	4	2	26.26	1435	0.023	4046.96	1	38
30531	2	9.24	10.81	0.885	57.7	2	73	3	4	2	24.77	1949	0.022	10458.4	1	38
34850	2	14.17	5.77	1.414	57.7	1	71	3	3	2	25.19	1268	0.035	8798.57	2	54
39659	1	13.69	12.64	1.587	57.7	2	84	4	3	2	34.32	1522	243	5308.88	1	55
44725	1	13.33	7.35	1.062	57.7	1	80	3	4	2	24.98	1204	0.017	7427.24	1	63
12404	1	20.49	12.5	0.877	57.8	1	65	3	3	1	42.2	897	0.183	10639.5	2	20
14480	2	8.25	5.1	0.634	57.8	2	81	3	1	2	25.52	1187	0.011	4051.18	1	23
21501	2	10.04	10.33	1.243	57.8	2	65	3	3	2	26.13	1356	0.034	26994.1	2	32
24191	2	5.66	4.4	0.548	57.8	1	66	1	1	2	24.74	1364	474	1295.06	2	40
27739	2	10.53	9.84	1.906	57.8	1	68	3	5	2	29.35	2412	1.15	7726.69	1	29
31746	1	9.49	12.53	0.836	57.8	2	77	3	1	1	27.66	1248	0.051	17360.8	2	46
34036	2	8.4	6.56	0.557	57.8	2	85	3		2	23.28	1269		10880.8	2	47
36354	2	8.17	6.66	0.759	57.8	1	70	4	3	1	30.29	1910	0.011	4159.61	2	58
37442	2	8.46	5.1	1.045	57.8	2	55	4	5	2	44.86	962	0.011	8399.81	2	45
38703	2	7.3	6.11	1.38	57.8	2	76	1	3	2	27.44	1585	118	3683.11	1	55
46536	1	7.21	7.7	0.665	57.8	2	79	3	2	2	30.96	900	0.03	6955.49	1	61
47588	2	13.34	10.6	0.737	57.8	2	77	3	4	2	24.89	1364	0.105	6434.59	2	64
51348	1	16.19	12.57	1.458	57.8	1	80	3	5	2	28.15	2206	0.204	12247	1	66
13203	2	9.35	4.14	0.938	57.9	2	60	3	5	2	18.97	1460	319	15932.7	1	23
16583	2	6.54	6.01	0.764	57.9	1	78	3	3	2	21.62	1442	0.011	2042.31	2	23
24207	2	6.41	7.16	0.7	57.9	1	60	3	4	2	23.02	1458	0.465	15897.6	1	31
31668	1	9.29	8.97	0.987	57.9	2	85	3	4	2	21.13	1221	0.011	6445.24	2	49
34042	2	11.55	6.51	1.337	57.9	2	54	4	4	2	26.7	2411	0.016	6161.15	1	52
43702	1	2.22	1.42	0.288	57.9	2	80	4	1	1	22.35	431	213	6027.87	2	67
46712	1	18.66	6.49	1.046	57.9	2	80	3	4	2	25.73	1822	0.017	5153.67	2	69
14022	2	7.95	6.1	0.955	58	1	72	4	1	1	24.99	1178		3419.25	1	16
16217	2	6.6	6.74	1.088	58	2	61	4	4	2	27.55	827	0.011	5152.01	2	18
24879	1	6.46	3.09	1.083	58	1	76	4	4	1	38.17	1369	0.038	4629.15	1	41
46476	2	9.25	4.8	0.614	58	2	73	1	1	2	27.59	1117	0.011	4745.54	1	66
10874	2	9.84	5.27	1.109	58.1	2	81	3	1	2	30.9	1756	1.45	11313.6	2	22
14080	2	5.68	5.97	0.534	58.1	1	62	5	5	2	32.17	782	31.5	14698.4	2	17
16561	2	22.36	19.53	0.839	58.1	2	85	3	3	2	21.71	1031	0.011	4816.05	2	21
18928	2	8.37	7.33	0.663	58.1	1	71	3	2	2	20.58	1539	217	10547.8	1	18
23138	2	8.76	6.45	0.51	58.1	2	72	3	3	2	28.75	1305	2.87	9569.06	1	41
31192	2	7.17	6.13	0.478	58.1	2	60	3	4	2	35.6	568	0.037	9938.88	1	44
32017	2	7.72	15.18	0.695	58.1	2	59	1	1	2	25.07	1168	0.011	15350.4	2	54
44910	2	12.79	5.37	1.317	58.1	1	62	1	1	2	24.26	1560	0.039	2278.3	2	70
48325	2	10.02	7.22	1.388	58.1	1	78	2	5	2	24.94	1517	0.011	1350.47	1	70
49821	2	14.66	5.71	0.7	58.1	1	72	4	1	2	25.54	1967	138	2497.67	2	66
49996	2	6.6	4.75	0.651	58.1	2	61	1	1	2	35.22	1023	0.017	4314.46	1	66
12138	2	8.56	4.36	0.952	58.2	1	64	4	3	1	42.48	1228	0.043	1281.28	2	15
19921	2	9.4	5.94	0.637	58.2	2	57	3	4	2	19.95	1836	0.037	19005.8	1	22
23521	2	23.22	26.96	1.569	58.2	2	59	4	5	1		1647	138	3231.56	1	41
37803	1	13.3	11.8	0.858	58.2	2	68	4	4	2	20.74	1928	0.053	6635.83	1	45
41668	2	7.94	8.51	1.015	58.2	1	66	4	5	2	28.28	1547	0.026	2329.06	2	62
51077	1	16.69	4.39	1.105	58.2	1	67	3	4	2	33.73	1420	0.021	14964.9	1	71
16790	2	7.26	2.88	0.813	58.3	2	70	4	4	2	35.18	1123	0.035	1691.4	1	24
35877	1	7.31	7.4	0.964	58.3	2	85	1	1	1	19.07	1243		3313.32	1	57
36691	2	9.67	11.2	2.332	58.3	1	82	3	5	2	26.28	2795	0.022	5181.96	2	56
38433	2	8.25	4.78	0.812	58.3	2	72	4	3	1	30.75	1172	0.023	4526.64	1	51
49871	2	7.08	5.88	0.779	58.3	2	63	3	2	2	32.25	1346	2.6	17785.1	1	59
17301	1	12.34	6.63	0.973	58.4	1	61	4	1	1	25.27	1936	245	2042.05	2	28
21874	2	6.04	7.44	0.218	58.4	1	66	4	1	1	37.45	786	1.43	4414.78	2	42
32350	2	12.14	8.51	3.706	58.4	1	76	4	2	2	27.46	2000	0.044	2099.95	1	49
43185	1	10.73	7.77	0.864	58.4	1	77	3	5	2	20.59	1711	0.011	5115.68	2	69
10719	2	14.37	13.8	1.358	58.5	1	58	3	4	2	27.77	3018	22.3	8990.78	1	26
20013	2	6.2	5.67	0.529	58.5	2	61	3	3	2	24.67	1380	154	9415.23	2	18
22802	2	14.66	4.9	0.726	58.5	2	73	3	1	1	19.33	928	0.058	7672.15	2	31
32581	1	17.49	7.32	0.829	58.5	2	83	3	3	2	36.85	1158	0.322	8002.39	1	49
34905	2	9.2	6.32	0.972	58.5	2	57	3	4	2	25.23	1789	0.023	14208.9	1	45
39433	1	11.28	5.92	0.888	58.5	2	80	3	3	1	32.94	1100	0.016	15075.8	2	44
46283	1	8.63	7.09	0.808	58.5	2	80	3	1	2	28.29	1206	257	7003.76	2	59
51071	2	11.92	9.61	1.011	58.5	2	80	3	5	2	28.46	1621	0.026	7242.45	2	67
15050	2	9.54	5.48	0.952	58.6	2	77	3	4	2		1685	77.8	4961.95	1	22
16186	1	16.61	9.02	0.451	58.6	2	75	3	2	1	29.97	1163	160	15909.9	2	23
25175	1	14.31	10.83	0.78	58.6	2	70	4	1	2	26.33	1163	0.011	4489.41	2	35
30811	2	9.53	10.39	1.582	58.6	2	75	4	4	1	27.03	1707	1.01	2519.74	1	36
38897	1	15.59	15.42	1.15	58.6	1	78	3	2	1	29.66	1231	0.057	14511.7	2	53
39792	1	13.68	4.78	0.433	58.6	2	77	1	1	2	29.22	1377	165	1449.61	2	54
42269	1	10.33	7.52	1.238	58.6	2	69	2	1	1	27.88	1720	0.019	2155.15	1	65
46907	2	8.62	9.21	0.762	58.6	1	58	2	1	1	27.1	1445	262	4204.35	2	61
51137	1	19.54	9.84	1.787	58.6	2	76	3	3	2	24.36	1483	0.113	13092.6	2	60
19498	2	31.99	4.88	0.908	58.7	1	68	3	1	1		1916	516	18567.5	1	23
19947	2	34.77	3.99	0.552	58.7	1	66	4	1	2	18.52	2012	223	1118.97	1	25
22134	2	15.48	13.21	1.068	58.7	2	85	3	5	2	28.53	1311	0.071	5453.21	1	29
22137	2	10.52	3.31	0.811	58.7	2	77	3	4	1	26.85	1687	0.022	11664.4	2	35
25627	1	7.66	6.4	0.65	58.7	2	85	3	3	2	30.36	1175		8148.88	2	39
22333	2	9.72	4.69	0.624	58.8	1	68	4	4	1	24.46	1780	0.03	3539.03	2	37
26227	2	6.78	9.47	0.904	58.8	2	70	1	1	1	31.44	1216	0.011	2336.96	1	40
41691	2	27.1	11.61	0.708	58.8	1	60	3	3	2	31.98	1385	0.266	20182.9	2	63
42187	2	8.29	6.97	1.078	58.8	2	52	4	3	2	24.33	1933	634	8119.06	1	64
42392	1	20.53	4.15	0.593	58.8	2	65	4	2	2	49.76	948	0.033	2232.64	1	64
50637	1	26.38	13.14	1.499	58.8	1	80	3	4	2	26.34	2043		4505.96	2	71
10489	1	6.45	3.72	0.553	58.9	1	82	2	3	2		1463	0.28	8649.81	2	27
19485	2	8.87	9.01	1.068	58.9	1	59	3	5	2	29.79	1907	313	10036.4	1	14
22652	2	52.25	41.73	2.146	58.9	1	65	3	5	2	26.96	2261	0.518	7509.06	2	31
25217	2	13.29	6.99	0.872	58.9	1	74	3	4	2	25.64	1441	0.023	14881.7	1	32
29390	1	10.06	5.63	0.951	58.9	1	81	3	3	2	36.09	1458	0.011	7375.07	2	39
51569	2	17.36	11.78	1.724	58.9	2	56	3	3	2	25.94	2049	0.011	4055.19	2	69
13385	2	7.39	2.52	0.56	59	2	63	1	1	1	29.49	826	0.431	3928.47	2	27
24088	1	9.85	10.12	0.754	59	2	71	5	2	1	38.81	1503	0.141	18603.3	2	33
25764	2	8.84	6.01	1.463	59	2	53	4	3	2	39.93	1572	0.587	9334.57	1	41
32624	1	9.36	4.09	0.633	59	2	74	3	4	1	28.64	1064	0.256	16230.2	2	49
46599	2	6.8	4.82	0.44	59	2	59	2	2	2	24.3	1132	265	6511.31	1	72
10704	2	8	9.89	0.748	59.1	1	76	1	2	2	21.97	724	0.042	1988.69	2	27
15356	2	12.46	7.28	0.502	59.1	2	63	3	5	2	27.61	954	174	22339.3	2	14
15466	2	5.33	3.7	0.495	59.1	2	69	3	5	1	35.86	887	0.022	29699.6	2	22
25365	2	11.33	11.57	0.985	59.1	2	56	3	4	2	29.07	1733	0.043	17412.5	2	31
25595	1	7.18	2.45	0.579	59.1	2	85	3	5	2	21.48	738	0.015	6547.69	2	43
32924	2	8.11	3.29	1.168	59.1	1	53	4	1	1	49.8	1173	310	10793.6	1	49
34707	2	6.1	3.44	0.597	59.1	2	69	4	4	2	35.69	1291	0.041	3579.55	1	52
45186	2	10.73	5.26	0.705	59.1	2	63	4	4	2	42.39	2788	0.295	3533.2	2	74
47397	2	16.14	10.06	0.886	59.1	1	62	3	4	1	39.95	894	0.011	11416.6	1	63
49075	2	10.28	7.33	0.823	59.1	2	63	4	4	2	35.49	1388	341	2307.13	1	62
14572	1	10.74	8.38	1.058	59.2	2	85	3	1	1	26.57	1366	0.011	5808.49	1	23
17838	2	8.84	5.49	1.23	59.2	1	67	3	5	2	28.31	1657	0.019	15925.7	1	19
21104	2	12.54	9.17	0.691	59.2	1	70	4	1	1	29.33	1353	0.045	2477.79	2	35
22943	2	12.39	14.03	3.026	59.2	1	60	3	1	2	28.21	1396	210	4524.51	2	31
31441	2	6.74	5.21	0.39	59.2	1	62	4	4	1	33.74	949	24.1	1214.18	2	51
43612	2	5.84	3.7	0.573	59.2	2	56	4	2	1	26.88	1015	203	3035.12	1	63
44628	1	11.91	13.28	0.863	59.2	2	80	3	4	2	33.58	1156	0.011	8061.33	1	61
46761	2	7.8	3.92	0.832	59.2	2	65	4	4	2	27.17	1145	0.034	2896.43	2	70
47705	2	23.41	17.64	1.443	59.2	1	74	3	4	2	36.74	1657	0.011	9714.95	2	68
20303	2	2.38	5.06	0.192	59.3	2	62	3	2	2	19.58	918	352	8680.6	2	20
33605	2	10.85	5.64	1.11	59.3	2	68	3	4	2	44.17	1101	0.015	15176	1	54
36950	2	10.86	7.62	1.085	59.3	1	67	4	1	1	37.97	1734	10.8	2148.8	1	52
41671	1	13	7.13	0.472	59.3	1	80	3	3	2	25.76	1206	0.048	6486.28	2	60
44351	2	8.1	8.5	0.861	59.3	1	57	3	5	2	24.45	1791	0.022	32386.1	1	74
45764	1	6.69	5.08	0.869	59.3	1	80	3	4	2	22.45	1112	0.019	4936.51	1	63
48804	2	5.31	7.59	0.267	59.3	1	80	1	4	2	22.82	1416	0.331	3205.91	2	70
49875	2	7.75	11.61	0.953	59.3	2	57	4	2	2	32.27	1620	227	4003.55	1	74
51474	1	17.88	15.73	2.016	59.3	2	68	3	5	2	19.81	1742	331	20289.7	1	60
15261	1	9.97	6.62	0.9	59.4	2	64	2	1	2	35.56	1593	0.011	1177.81	1	17
17108	2	9.97	9.23	0.936	59.4	2	57	3	5	2	27.88	1845	0.011	24407.4	1	17
18508	2	13.69	5.78	1.26	59.4	2	60	1	4	2	29.85	2282		524.853	1	15
27671	2	8.64	6.18	0.563	59.4	2	62	3	3	2	23.42	1099	0.021	22768.5	1	38
36220	2	7.25	5.57	0.783	59.4	2	65	3	3	2	33.29	918	0.206	7196.63	2	44
37311	2	18.56	13.47	1.552	59.4	1	62	3	3	1	35.38	1700	0.022	27204.6	2	48
39621	2	9.83	9.01	0.962	59.4	1	78	3	1	2	24.75	1429	0.077	6471.81	2	49
46499	2	5.01	3.35	0.447	59.4	1	80	2	1	1	26.3	792	0.011	3112.23	1	62
17610	2	12.79	8.03	1.116	59.5	1	71	3	3	1	29.97	2043	0.017	10340.6	2	14
27635	2	7.91	3.15	0.716	59.5	2	56	3	3	2	29.61	1103	0.3	11795.3	1	39
31546	2	7.31	5.22	0.585	59.5	2	80	3	2	2	32.22	1204	110	10059.3	1	45
34249	1	9.87	7.46	1.045	59.5	2	81	3	3	1	23.59	1848	0.049	6109.17	2	44
34393	2	20.6	11.44	1.366	59.5	1	69	3	3	2	23.03	3064	240	25169.7	2	44
41576	2	7.39	6.21	0.732	59.5	1	68	4	2	1	34.2	875	133	2076.38	2	67
41579	2	21.93	17.21	0.832	59.5	2	71	3	3	2	19.12	1702	0.011	13092.6	2	60
49745	2	20.13	19.48	1.314	59.5	1	79	3	4	2	31.91	1601	0.042	3205.85	1	66
21181	2	14.76	8.47	1.351	59.6	2	61	3	3	1	34.57	2301	0.011	4846.59	2	30
22897	2	19.39	20.17	2.206	59.6	1	61	3	4	1	30.46	1487	387	19469.7	2	31
24771	2	12.79	7.07	0.925	59.6	1	77	1	1	2	20.93	1798	0.043	707.458	1	34
25043	1	10.22	9.96	0.685	59.6	2	85	4	2	2	28.99	1068	0.138	6487.6	2	31
28828	2	20.91	17.84	1.071	59.6	1	75	3	4	2	25.65	1689	0.011	7596.98	1	40
44381	2	17.66	8.31	0.67	59.6	1	75	3	3	2	28.93	1079	0.018	9598.09	2	68
48962	2	18.58	14.51	0.812	59.6	1	64	5	2	2	34.61	1712	0.078	12823.4	1	69
51018	2	13.66	7.28	2.386	59.6	2	65	3	2	1	30.16	2668	0.033	13593.1	2	60
51518	2	7.28	8.36	0.436	59.6	2	71	3	4	2	19.07	923		8204.44	1	63
10436	2	5.63	5.65	0.705	59.7	1	52	4	3	2	32.5	1248	0.367	4789.03	2	25
11578	2	11	12.34	0.795	59.7	2	55	1	2	2	28.15	1520	0.047	1978.08	2	27
24221	2	8.81	3.35	0.765	59.7	2	72	3	4	1	23.23	1386	0.038	13287.2	2	39
24836	2	15.73	6.91	0.768	59.7	1	81	3	3	2	29.31	1416		5328.57	1	32
25074	2	5.85	5.28	0.825	59.7	2	62	4	2	1	27.99	1187	0.219	4450.04	1	41
27482	2	4.35	3.42	0.286	59.7	2	69	4	2	2	21.67	761	0.089	8485.81	2	37
41966	2	6.99	4.4	0.49	59.7	1	62	5	3	2	21.36	760	0.032	14949.5	2	69
46282	2	21.22	18.48	1.397	59.7	1	60	4	5	2	23.44	2152	0.011	1433.91	2	73
49644	2	21.1	15.28	1.472	59.7	1	60	3	5	2	26.9	2671	0.011	23638.1	1	60
51102	2	7.81	6.9	0.467	59.7	2	70	3	3	2	29.89	1297	177	8069.88	2	68
19343	1	6.26	5.16	0.78	59.8	2	85	3	4	2	28.42	1089	0.054	6988.69	2	26
19559	2	8.43	7.78	0.904	59.8	2	76	3	2	2		1310	0.011	11119.8	1	21
20602	2	9.08	6.24	0.716	59.8	2	84	3	4	2	32.17	1516	0.011	3298.4	1	23
22136	2	10.26	6.2	0.483	59.8	1	70	1	1	1	31.47	1362	0.011	601.548	1	34
22850	2	10.98	11.7	1.531	59.8	1	83	3	4	2	29.65	2934	0.082	4870.51	2	39
35668	2	8.5	9.04	0.736	59.8	2	81	3	3	2	28.22	998	0.656	9327.77	1	45
36464	2	6.84	5.21	0.578	59.8	1	59	4	3	2	26.05	1582	276	15221.2	2	51
39725	2	12.91	7.96	0.541	59.8	2	79	3	2	1	27.45	1053	0.011	14248.8	1	44
43294	2	9.88	6.78	1.171	59.8	2	63	1	4	2	36.67	1548	0.011	1951.17	1	71
47815	2	20.16	8.57	1.548	59.8	1	62	1	1	2	29.02	1707	0.011	1877.02	2	71
16898	1	5.94	4.67	0.624	59.9	1	82	3	2	2	26.79	1779	0.03	2770.58	1	16
19178	2	13.54	8.52	0.78	59.9	1	69	3	3	2	24.33	1405	0.206	18400	2	24
25543	2	7.41	7.1	0.741	59.9	1	57	4	4	2	41.36	1627	0.063	16593.2	1	37
34771	2	7.85	6.4	1.139	59.9	2	60	1	3	2	31.36	1533	0.011	4631.19	2	57
40064	2	15.34	12.81	1.386	59.9	1	56	1	1	2	31.34	1786	0.025	2823.9	2	53
47203	1	15.11	7.07	1.716	59.9	1	73	4	5	2	28.47	2304	0.022	2354.38	1	74
11511	2	6.65	2.63	0.546	60	2	75	3	4	2	26.79	1123	0.026	5676.22	1	22
28917	2	9.53	2.57	0.59	60	1	67	3	2	2	26.96	1169	423	9019.23	2	31
32298	2	6.53	6.51	0.687	60	2	62	5	3	2	23.17	1263	0.029	27263.6	1	47
34173	1	6.67	6.93	0.809	60	1	78	3	3	2	20.58	1491	450	16980.8	2	48
35588	2	12.5	14.18	1.021	60	2	67	1	3	1	29.2	1358	0.2	2351.21	1	57
48658	2	6.5	4.53	0.755	60	2	80	3	1	1	22.6	1101	0.224	8087.71	2	61
50813	2	5.45	4.47	0.643	60	1	56	3	1	1	35.94	728	530	10401.9	1	61
24573	1	12.59	9.21	0.836	60.1	2	56	3	3	2	33.28	1949	0.726	17891.3	1	32
29456	1	7.3	8.7	0.474	60.1	2	83	1	1	2	33.51	894	0.011	1140.01	2	38
35624	2	6.26	5.57	0.482	60.1	2	62	3	4	2	18.73	1380	164	25124.6	1	55
38614	2	9.96	9.3	1.323	60.1	1	58	3	4	2	29.83	2033	299	33564.3	1	45
39278	2	4.25	4.45	0.274	60.1	1	60	3	1	2	23.15	540	216	10508.3	2	50
43824	1	8.27	6.63	0.633	60.1	2	79	3	3	2	26.08	1045	0.011	14426.8	2	72
43962	1	10.03	5.48	1.421	60.1	1	74	3	3	1	27.59	1461	0.034	10740.7	1	67
11217	2	23.2	14.81	1.672	60.2	1	74	3	3	2	36.68	2036	0.455	9717.52	2	26
15642	2	8.36	7.92	0.67	60.2	2	66	1	1	1	37.5	1084	0.011	1457.59	2	28
43794	2	7.58	5.05	0.701	60.2	2	70	2	5	2	44.11	911	0.041	2552.42	1	72
17414	2	6.94	5.1	0.618	60.3	1	63	3	3	2	24.19	1393	675	5068.04	2	23
35493	2	37.69	9.97	1.015	60.3	1	69	3	4	2	28.09	1744	0.011	41106.6	2	46
37702	2	5.95	5.08	0.581	60.3	1	71	3	3	2	24.75	1702	0.011	9050.48	1	47
38689	2	8.73	7.55	2.123	60.3	1	62	4	2	1	30.05	1120	295	1137.66	1	48
40389	2	6.25	7.51	0.631	60.3	1	71	3	3	2	49.13	1190	0.011	2941.18	2	47
47375	2	8.47	5.31	1.745	60.3	1	61	3	4	2	28.62	1185	0.011	9216.84	2	62
48819	1	4.68	4.61	0.352	60.3	2	80	3	4	2	26.03	882	0.011	19558.2	2	60
13604	2	9.67	6.97	0.62	60.4	2	67	3	2	2	26.02	935	0.223	16400	1	21
27730	1	22.04	8.96	1.02	60.4	2	85	3	3	1	22.94	1514	0.011	5905.03	2	39
42692	2	6.62	7.77	0.658	60.4	2	63	1	1	2	31.09	873	2.18	2815.38	1	65
44061	2	10.03	4.56	0.876	60.4	2	80	3	5	2	24.41	1169		8501.19	2	67
50517	2	20.5	10.54	1.259	60.4	1	63	3	4	2	36.53	1411	0.011	12251.8	1	60
15813	2	9.16	4.83	1.204	60.5	2	61	1	2	2	23.6	996	0.028	1087.55	2	17
20924	2	42.7	7.98	0.809	60.5	1	72	4	2	2	31.93	2239	0.177	7544.62	1	14
21345	2	6.1	5.1	0.48	60.5	2	63	4	3	1	29.21	1159	0.046	4126.65	2	37
22637	2	7.85	10.09	0.592	60.5	1	65	1	2	2	36.22	1529	0.054	617.564	2	38
28750	2	8.01	10.89	0.801	60.5	2	75	3	3	1	22.22	1209	0.011	9957.65	1	37
34582	2	6.6	4.08	0.554	60.5	1	61	4	2	1		1053	5.11	5200.13	1	46
35528	2	9.76	6.61	1.464	60.5	1	71	3	3	2	24.54	1309	0.149	5788.77	1	49
47758	2	6.5	5.17	0.568	60.5	2	71	3	5	2	27.57	961	0.407	18574.5	2	60
50765	2	5.04	4.78	0.362	60.5	2	64	4	1	2	28.83	944	0.088	3308.38	1	71
36065	2	11.22	8.7	0.773	60.6	2	55	3	4	2	23.07	1196	0.074	17248.6	2	47
38678	2	10.29	8.46	1.179	60.6	2	68	3	3	2	25.63	1206	0.116	9723.3	2	44
42453	2	10.67	11.26	0.949	60.6	1	74	3	2	2	35.15	2147	0.011	1779.56	2	63
13215	2	31.32	11.76	0.959	60.7	2	59	3	3	2	30.08	2088	0.852	27806.4	1	19
16736	1	9.12	6.15	1.437	60.7	2	85	3	4	2	21.3	1299	0.03	4382.55	2	20
19813	2	6.69	6.94	0.448	60.7	1	57	4	2	2	27.65	1098	54.9	8585.28	1	20
24295	2	13.87	4.01	1.336	60.7	1	60	1	3	1	33.57	1813	241	463.252	1	34
26422	2	9.33	10.11	1.329	60.7	2	60	1	5	2	30.29	1483	0.011	4313.5	2	38
27312	2	5.51	3.41	0.657	60.7	1	65	1	1	2	24.54	1345	0.011	688.592	2	43
39728	2	8.08	4.53	0.671	60.7	2	64	3	3	1	29.03	984	0.011	52231.6	2	55
42389	2	6.34	7.49	0.595	60.7	2	64	3	3	2	22.11	896	396	20686.4	2	63
42441	2	8.99	5	0.79	60.7	1	64	5	3	2	30.77	1101	351	12701.1	2	70
44281	2	21.91	10.89	1.216	60.7	2	74	1	1	1	25.06	1320	0.011	4574.83	1	66
13463	2	8.38	6.73	1.083	60.8	1	80	3	1	2	28.41	1845	0.038	3818.92	2	14
22418	2	13.45	6.92	0.686	60.8	2	83	3	5	2	27.98	1580	0.094	5304.59	1	29
30866	2	6.41	2.38	0.653	60.8	2	65	1	1	2	20.98	1161	0.016	596.662	1	34
35517	2	14.09	14.53	4.282	60.8	1	73	3	3	2	30.88	2080	1.71	3265.82	2	50
37914	1	37.13	33.08	0.92	60.8	2	78	3	3	2	30.03	1140	0.036	17260.2	2	46
39343	1	5.06	3.2	0.43	60.8	2	60	3	4	2	18.76	879	142	10464.3	2	44
44854	2	6.12	3.6	0.518	60.8	2	80	1	1	2	21.17	1051	0.028	2643.53	1	66
46317	2	4.45	6.22	0.475	60.8	2	71	4	2	1	35.63	816	0.011	2786.14	1	73
11277	2	7.62	5.4	1.312	60.9	1	74	3	5	2	28.41	1111	0.019	4006.27	1	21
18556	2	7	5.97	0.61	60.9	2	61	1	4	2	34.86	1039	0.126	1921.37	2	27
21090	2	9.98	4.66	1.316	60.9	1	56	4	2	2	26.46	2032	1.55	13285.6	1	41
32859	2	11.47	5.59	0.758	60.9	2	65	3	4	2	16.92	1286	253	14613.2	1	46
42761	2	6.54	3.6	0.542	60.9	1	62	2	3	2	35.1	1193	0.124	1151.51	1	62
10462	1	10.91	4.52	1.349	61	1	84	3	2	2		1681	51	4221.58	2	22
14259	2	20.28	10.66	1.018	61	2	58	4	4	1	32.56	1764	0.081	2627.59	1	26
15479	1	14.47	7.82	1.11	61	1	85	2	4	2	25.93	1687	0.011	2250.58	1	17
18374	2	18.47	18.22	1.201	61	2	72	3	5	2		1865	0.011	19002.6	2	22
21393	2	11.87	6.48	0.729	61	1	66	3	4	2	25.08	1871	576	10935.8	2	34
24424	2	6.68	8.6	0.377	61	2	58	3	2	2	38.34	944	267	38050.8	1	30
27016	2	9.39	3.93	0.544	61	2	76	3	1	2		1170	0.016	10214.8	2	34
46650	2	6.41	7.39	0.748	61	1	80	1	1	1	34.09	843	0.015	4785.2	2	65
48954	1	13.26	11.1	0.962	61	1	80	3	2	2	27.75	1204	0.03	2331.54	1	67
20145	2	17.04	16.38	1.086	61.1	1	80	3	5	2	28.12	1439	0.011	4546.16	2	21
20999	1	20.15	8.9	0.844	61.1	1	85	3	3	1	28.54	1771	1.42	3072.85	2	22
32068	2	15.3	9.22	1.394	61.1	2	81	3	1	2	34.25	2524	0.033	10703.1	2	48
32452	1	17.83	12.94	1.454	61.1	1	74	3	5	2	25.99	1563	0.019	6413.6	2	49
36247	2	8.52	12.77	0.8	61.1	1	60	5	3	2	26.27	1639	0.024	22214.9	1	51
43452	1	4.79	4.01	0.54	61.1	2	80	4	2	2	29.12	834	0.016	10283.5	2	70
43871	2	7.54	5.82	0.891	61.1	2	58	4	5	2	31.43	1563	0.042	4831.23	1	59
44066	2	4.33	8.61	0.485	61.1	2	55	1	1	2	35.53	800	0.08	2328.39	1	66
14166	2	8.4	6.97	0.69	61.2	2	77	1	1	2	29.72	1548	0.351	1139.18	2	17
18588	1	5.99	5.22	0.593	61.2	2	82	3	2	2	23.11	1631	0.017	3363.46	1	16
26489	2	21.68	9.08	0.831	61.2	2	61	2	1	2	27.26	1358	0.011	17240.8	2	36
30898	1	13.99	13.03	0.847	61.2	2	73	3	2	2	23.91	1163	162	16993.6	2	35
32630	2	8.73	5.72	0.772	61.2	1	60	5	5	2	23.7	1095	0.018	12933.9	2	53
43826	2	13.15	11.71	0.881	61.2	1	60	3	4	2	26.87	1456	0.024	11988.5	2	69
26607	2	7.81	6.62	0.771	61.3	1	85	3	1	2	26.63	1320	0.011	2653.61	2	34
28429	2	7.48	6.5	1.104	61.3	2	85	3	2	2	29.78	1223	0.09	4752.22	1	35
30012	1	7.44	6.97	0.558	61.3	2	70	3	3	2	26.86	1332	0.011	14572.7	1	31
39180	2	4.53	2.56	0.318	61.3	1	54	4	4	2	30.72	2178	230	4120.83	1	49
13537	1	4.71	4.49	0.438	61.4	2	85	3	4	2		833	0.035	6535.39	1	24
21610	1	6.22	3.35	0.387	61.4	1	75	5	4	1	21.77	1229	0.028	7072.59	1	40
22762	2	17.51	11.38	0.931	61.4	2	72	3	5	2	27.61	1259	0.011	16076.4	2	35
31960	2	12.82	6.58	0.893	61.4	1	56	1	1	1	26.85	1581	0.011	1683.21	2	58
33096	2	17.64	11.75	1.249	61.4	1	81	4	5	2	21.44	1443	0.049	2694.78	1	51
34016	2	6.69	5.61	0.634	61.4	2	85	4	1	2	26.02	1296	107	3739.45	1	52
45435	2	10.38	5.45	1.048	61.4	1	67	3	5		20.59	1287	0.027	3131.45	1	70
47087	2	9.72	4.57	1.078	61.4	2	63	2	5	2	31.31	1471	0.029	4834.31	1	72
47306	1	6.47	6.05	0.702	61.4	2	79	1	1	2	32.09	1322	0.011	5918.84	1	66
49271	2	6.81	7.48	0.794	61.4	1	55	5	3	2	23.48	1229	0.29	57929.7	2	65
29326	2	11.8	14.58	2.7	61.5	1	58	3	4	1	33.27	1866	10.8	48104	1	38
33673	1	4.85	3.36	0.672	61.5	1	85	3	4	2	31.89	819	0.021	3487.94	2	56
41797	2	17.49	9.65	0.779	61.5	1	69	3	3	2	28.15	1990	0.011	12125	1	60
43251	2	9.3	9.25	0.764	61.5	2	67	3	3	2	28.4	985	0.766	7982.62	1	67
46657	2	18.58	6.5	0.981	61.5	1	74	3	3	2	37.77	1183	0.025	9495.98	1	67
11402	1	14.51	8.56	1.213	61.6	2	77	3	4	1	28.29	1186	0.042	14817.7	1	19
17993	2	10.95	10.03	0.864	61.6	2	56	3	5	2	23.94	2351	0.03	11476.5	1	21
22638	2	13.46	9.23	1.103	61.6	2	73	3	4	2	29.07	1737	310	12726.9	2	30
23593	2	9.69	7	1.314	61.6	2	60	3	3	2	25.41	2111	0.268	31280.5	2	34
24768	2	12.04	6.93	0.973	61.6	1	70	1	1	2	27.52	1033	28	902.314	2	40
27430	2	11.21	5.92	0.989	61.6	1	74	3	3	2	30.25	1337		4265.14	2	34
40124	2	19.21	12.84	1.816	61.6	2	80	4	2	1	22.8	1626	263	3851.58	1	55
46252	1	8.36	8.87	0.993	61.6	2	80	3	3	1	24.01	2185	0.026	11196.1	2	60
20047	1	5.3	5.12	0.396	61.7	1	85	1	1	2		1102	0.062	935.638	2	25
23247	2	5.55	5	0.471	61.7	1	72	4	3	1	30.47	1340	25.8	3544.17	2	36
37069	2	6.72	5.14	0.686	61.7	1	75	3	3	2	21.81	1422	317	3852.84	2	47
38410	2	10.99	9.02	1.22	61.7	2	63	1	4	2	30.93	2040	0.15	1899.75	2	45
38849	2	9.1	7.24	1.184	61.7	2	65	3	4	2	22.95	1324	0.035	24397.1	1	49
46995	1	20.11	12.94	1.28	61.7	2	79	3	5	2	26.87	1518	0.011	9719.38	1	60
50644	2	6.69	7.08	0.647	61.7	2	53	4	2	2	28.11	1704	272	4466.75	1	61
50779	1	6.54	4.22	0.53	61.7	1	69	4	1	1	28.54	743	1.06	3519.14	2	67
51299	2	8.81	5.31	0.443	61.7	1	58	3	2	1	26.88	960		8490.16	1	68
12817	1	6.19	7.29	0.938	61.8	2	69	3	2	1	26.49	765	0.019	14105.9	2	23
23710	2	10.53	6.27	0.94	61.8	2	60	3	3	2	31.47	1363	144	17497.8	2	34
25607	2	7.67	5.68	0.71	61.8	1	78	4	2	2	22.94	1493	0.709	3403.71	1	41
31108	2	8.74	3.38	1.032	61.8	2	72	3	3	2	29.92	995	0.011	5561.6	2	30
31425	2	7.73	8.24	1.232	61.8	2	63	3	4	2	28.96	1609	0.316	13641	2	46
33569	1	9.14	5.6	0.91	61.8	2	79	3	3	2	25.03	1433	0.011	18958.8	2	47
33925	2	16.59	8.04	1.744	61.8	2	71	3	5	2	19.93	2983	0.011	13325.9	2	56
37540	2	11.97	8.67	2.28	61.8	2	70	4	2	2	30.36	1711	0.011	3217.98	1	56
38824	2	11.05	5.86	1.309	61.8	2	59	3	4	2	22.72	1301	271	7702.25	2	46
45788	2	6.81	4.72	0.737	61.8	2	64	2	5	1	41.05	775	0.019	1990.53	1	65
48705	2	8.37	6.83	0.895	61.8	1	60	4	2	2	24.66	1645	0.049	1591.9	1	59
11786	2	4.95	3.74	0.59	61.9	1	63	2	4	1	28.09	718	148	1548.28	2	27
22554	1	12.59	9.84	1.123	61.9	1	63	3	3	1	30.72	1406	28.1	4082.22	2	34
25376	2	17.47	10.97	1.369	61.9	1	81	3	2	2	26.1	2808	0.026	2978.12	2	29
26435	1	10.35	7.86	0.931	61.9	2	85	5	3	1	20.9	1476	0.015	5028.08	2	39
31563	1	5.48	4.97	0.934	61.9	2	61	3	3	2	40.51	1052	0.018	22882.8	2	49
36739	2	23.54	11.28	0.835	61.9	2	62	1	4	2	25.9	1402	0.011	786.362	2	58
46636	1	12.41	5.4	0.943	61.9	2	76	3	4	2	35.57	1319	0.04	8067.15	2	60
50142	2	28.32	10.3	5.557	61.9	1	55	2	5	2	29.89	2544	0.011	4922.11	1	70
14659	2	12.67	9.43	1.299	62	2	55	5	4	2	26.1	2025	0.378	5372.95	2	15
14739	1	6.43	3.72	0.699	62	2	85	3	2	1	24.26	1025	0.015	10725.9	2	22
17856	2	6.82	4.09	0.516	62	2	56	3	4	2	19.3	1480	157	29111.7	2	24
20258	2	14.3	7.96	0.553	62	2	60	2	4	1	27.9	767		5010.29	2	14
26957	2	13.54	10.97	0.479	62	2	61	3	4	2	27.14	836	0.011	33619.7	1	31
34223	1	11.05	8.84	1.115	62	1	60	1	1	2	21.81	1849	112	1825.39	2	49
43414	2	24.09	6.99	0.673	62	1	67	4	4	2	21.93	1431	80.4	1627.77	2	61
16637	2	7.02	6.32	0.649	62.1	2	75	3	2	2	18.42	1377	0.632	8047.14	1	19
19776	1	32.33	7.88	1.435	62.1	2	85	3	3	2	28.88	2219	0.077	4058.22	1	19
32688	2	6.64	5.34	0.314	62.1	2	63	4	2	2	30.54	1461	339	1722.41	2	51
36108	1	7.32	2.95	0.497	62.1	1	76	1	1	2	27.46	886	0.026	728.754	1	53
38597	2	8.5	3.99	0.761	62.1	1	57	4	3	2	29.76	1498	368	7065.22	1	49
41756	2	14.66	9.03	1.84	62.1	2	60	1	1	2	29.56	2216	0.02	1451.66	2	65
43168	2	6.49	3.41	0.803	62.1	1	78	1	1	2	30.78	1147	0.017	2320.14	1	66
43245	2	9.19	8.6	0.759	62.1	1	62	3	2	2	39.03	1715	249	4717.51	2	59
44804	1	7.88	6.36	0.715	62.1	2	80	3	3	2	21.88	1072	0.042	7154.87	2	63
22797	2	23.2	7.34	1.417	62.2	2	83	4	4	1	29.78	1465	0.065	3661.67	1	30
25873	2	5.06	6.2	0.396	62.2	2	61	4	1	2	46.67	1034		3521.51	1	32
26744	2	19.2	8.16	1.013	62.2	2	80	1	1	1	29.9	1444	0.011	672.838	1	43
34782	1	13.78	10.63	0.753	62.2	2	85	3	2	1	30.52	1104	0.011	7400.65	2	48
36265	2	7.51	5.41	0.623	62.2	2	54	4	4	2	21.82	1454	0.078	4939.61	2	56
40557	2	13.3	13.8	1.32	62.2	2	58	3	5	1	36.2	3162	0.023	23127.4	2	52
42683	2	15.77	10.69	0.95	62.2	1	75	3	5	2	33.98	1240	11.8	5116.73	1	70
44951	2	13.95	8.09	0.661	62.2	1	60	4	4	1	28.44	1167	0.025	2970.22	1	59
48516	2	14.77	9.5	1.572	62.2	2	80	3	3	2	29.41	1341	0.046	7409.74	1	68
11303	2	9.28	8.25	1.551	62.3	1	58	3	5	2	25.55	1940	0.017	6280.88	2	24
14272	2	15.75	19.88	1.729	62.3	1	73	3	1	2		1712	0.011	7399.8	1	19
19896	1	11.13	5.9	1.015	62.3	2	79	3	3	2	28.44	1403	0.049	14817.7	1	19
26184	1	7.38	7.35	0.627	62.3	2	66	4	5	2	35.84	1112	0.033	2118.77	2	39
27295	2	13.76	13.22	1.325	62.3	2	84	3	3	2	26.87	1587	0.011	5630.93	1	31
48055	2	7.95	7.04	0.854	62.3	2	58	4	2	2	29.56	1712	0.092	3631.44	2	71
49411	2	10.36	12.4	0.884	62.3	1	80	3	4	2	24	1977	0.011	6475.99	2	66
49795	2	6.39	6.17	1.811	62.3	2	64	4	3	1	43.34	1194	0.011	4507.37	1	65
18950	2	6.82	7.42	0.593	62.4	1	73	3	3	2		856	0.017	8199.2	2	21
21395	1	12.82	7.84	0.773	62.4	2	77	1	4	2	25.22	886	0.098	882.367	2	40
22270	2	12.64	6.21	1.121	62.4	1	68	4	4	2	34.57	1320	0.419	8323.85	2	35
42154	2	4.1	3.76	0.334	62.4	1	75	3	1	1	25.31	843	0.053	6374.1	2	59
15877	2	7.64	7.16	0.831	62.5	2	73	3	5	2	37.21	1030	0.011	5956.94	2	15
18497	2	7.73	8.43	0.854	62.5	1	57	1	1	2	27.58	1916	0.099	1194.06	2	25
32388	2	7.61	13.4	0.405	62.5	1	55	5	3	2	25.89	1437	253	55887.9	1	50
48486	2	29.42	20.21	2.444	62.5	1	80	3	4	2	36.13	2034	0.434	8081.57	1	68
12696	2	12.9	19.01	1.422	62.6	1	66	3	3	1	27.37	1378	0.011	12928.2	2	20
17906	2	9.74	5.49	0.749	62.6	2	68	1	4	2	24.7	1628	0.011	2259.62	1	17
18204	1	19.96	6.44	1.461	62.6	1	72	3	3	1	26.46	1324	0.017	7931.66	2	20
22734	2	9.11	4.91	0.803	62.6	2	63	1	1	2	32.13	1283	0.011	592.104	1	34
29463	2	21.47	22.79	0.608	62.6	2	71	3	4	2	25.51	2094	217	28499.5	2	36
37394	2	6.9	5.6	0.856	62.6	2	68	3	2	2	31.81	988	0.088	21101.1	2	49
38571	2	9.68	8.09	0.961	62.6	2	73	3	5	2	30.25	2056	0.035	8378.77	2	50
38870	2	5.54	5.76	0.589	62.6	1	70	1	1	1	27.65	1045	0.024	579.338	1	58
41486	2	10.43	8.02	1.261	62.6	2	61	1	1	2	31.21	1547	0.015	880.61	1	73
45255	2	7.77	7.82	1.308	62.6	1	67	3	2	2	33.59	1123	0.011	10077.3	2	63
47887	1	9.42	4.44	0.779	62.6	2	80	3	1	2	24.32	1521	0.011	13452.5	1	60
11384	2	18.01	6.55	0.82	62.7	2	69	2	3	1	26.06	1386	87.5	11384.8	2	16
12021	2	7.88	4.15	1.003	62.7	2	50	4	4	2	52.89	1378	0.035	2934.62	1	23
21922	2	16.58	4.85	0.93	62.7	2	66	2	1	2	23.15	1854	0.024	4952.76	1	35
28552	2	8.94	5.1	0.624	62.7	2	55	3	4	2	28.98	1525	0.011	16316.4	1	36
29916	2	12.9	6.04	0.729	62.7	2	84	3	3	2	34.83	1176	0.315	4122.03	2	33
33838	2	5.08	6.32	1.131	62.7	2	57	3	3	2	20.99	1026	266	18338.1	2	50
39877	2	8.09	8.14	0.565	62.7	1	63	4	2	2	17.27	1282	347	4159.42	2	51
42544	2	26.06	5.72	1.276	62.7	2	67	1	1	1	35.99	1532	0.067	1635.7	1	71
44680	1	6.59	5.54	0.458	62.7	2	65	4	1	1	46.13	1562	0.831	2270.2	1	61
46562	2	8.65	9.21	0.732	62.7	1	70	2	2	2	29.85	1424	0.025	2714.67	2	73
48543	1	15.21	12.62	1.79	62.7	2	80	3	5	1	20.11	1934	0.011	7708.38	2	68
14268	2	15.41	4.21	0.889	62.8	1	68	1	4	2	33.61	1326	0.044	1816.42	2	27
14652	2	12.83	9.3	1.825	62.8	2	55	4	5	2	22.67	1922	0.028	9138.82	1	16
17918	1	15.74	8.79	0.979	62.8	1	85	3	4	2		1485	0.034	3906.42	1	21
30061	2	11.09	7.03	1.025	62.8	2	53	4	2	2	28.12	1925	0.113	20774.4	2	36
32014	2	9.77	13.24	1.285	62.8	2	59	3	4	2	27.43	2122	0.025	56433.7	2	49
48140	2	12.37	10.3	0.689	62.8	2	69	1	2	1	27.16	776	0.011	1205.66	2	69
49160	2	14.59	5.7	0.889	62.8	2	65	3	5	2	25.61	1468	0.049	15602.1	2	67
50827	1	11.17	6.45	0.667	62.8	2	68	4	2	2	28.92	1185	0.103	4087.85	1	67
25325	1	11.4	8.13	0.849	62.9	2	77	3	2	2	23.76	1451	0.011	14604.8	1	42
27020	2	12.6	8.42	0.588	62.9	2	64	3	5	2	35.7	1911	0.078	20689.7	1	33
27085	1	14.6	5.17	0.51	62.9	1	85	3	4	1	31.78	977	0.029	1540.23	2	30
42193	2	6.53	3.85	0.545	62.9	1	61	3	4	2	37.8	1350	174	20360.5	2	60
46238	2	5.54	7.66	0.663	62.9	2	56	3	1	2	17.91	1041	94.9	6964.85	2	59
48042	1	6.39	4.54	0.751	62.9	2	79	3	2	2	23.59	1183	0.196	10450	1	69
18675	1	14.66	9.58	1.636	63	2	63	1	5	2	22.29	1796		954.922	2	27
22513	2	28.78	16.7	1.239	63	1	55	3	4	2	25.12	2154	0.063	25315.7	1	29
29118	2	14.39	5.31	1.559	63	2	77	4	2	2	26.01	2320	0.084	3529.65	1	30
31358	2	9.35	25.57	1.839	63	2	62	4	4	1	30.71	1147	0.104	3096.87	2	51
32716	2	11.76	4.29	0.9	63	2	66	1	2	1	51.42	1557	0.017	1158.05	2	55
46412	2	5.34	3.68	0.898	63	2	68	5	1	2	34	790	0.022	4905.18	1	62
46595	1	11.25	3.98	0.539	63	2	80	3	2	2	29.58	812	0.153	6160.42	2	62
13562	2	5.65	6.14	0.448	63.1	2	80	3	4	1	27.3	1133	0.128	5624.9	1	23
15106	2	30.41	13.91	0.887	63.1	1	83	3	2	2	23.51	1390	0.011	3059.54	1	19
26738	2	7.91	4.25	0.726	63.1	2	70	3	2	2	32.78	1232	0.011	10431	1	29
41461	1	11.1	8.55	1.24	63.1	1	85	3	1	2	22.65	2334	36.1	2956.51	1	55
47046	2	14.87	8.2	1.649	63.1	2	72	3	4	2	29.85	2316	0.011	10089.8	2	59
50703	2	7.36	6.65	1.069	63.1	2	61	1	1	1	29.82	1178	0.011	1200.87	2	64
15315	2	13.27	9.64	1.335	63.2	1	67	4	5	2	29.24	1436	0.035	1937.64	1	24
45933	2	14.98	11.48	1.79	63.2	2	63	3	4	2	25.82	2464	230	6094.93	2	72
10131	2	6.88	7.13	0.92	63.3	2	81	3	1	1	27.72	1549	0.093	7922.76	2	23
15179	2	7.01	6.65	0.935	63.3	2	80	3	3	1	27.37	1655	0.011	2812.25	1	23
17955	1	7.09	4.7	0.719	63.3	2	59	4	5	2	34.14	1329	0.047	7281.24	2	25
24199	2	3.97	3.35	0.303	63.3	2	75	1	1	2	31.02	718	253	1011.67	1	34
34069	2	7.62	6.68	1.238	63.3	2	62	3	5	2	29.31	1502	0.327	26668.4	2	50
48271	1	9.65	4.91	0.712	63.3	1	72	3	1	2	31.91	1379	254	7299.07	1	64
14596	2	8.38	9.7	0.597	63.4	1	78	4	2	2	25.45	1010	0.051	1399.91	1	21
19362	2	14.89	9.73	1.403	63.4	1	63	1	1	2	28.87	2292	382	1408.9	2	28
31339	1	8.14	3.24	0.632	63.4	2	85	5	2	2	24.69	1226	0.011	9697.32	2	54
38925	2	7.96	9.5	0.791	63.4	1	63	3	2	1	40.78	1394	0.051	7815.24	2	53
42920	1	12.52	10.9	0.819	63.4	1	80	3	5	2	24.34	1879	0.011	7005.73	2	66
43016	2	9.94	10.34	0.976	63.4	2	73	3	3	2	21.92	1098	0.031	9244.51	2	66
44679	1	12.27	3.97	0.53	63.4	2	80	3	3	2	25.84	814	0.017	19558.2	2	60
49256	2	14.35	10.53	0.84	63.4	1	58	3	3	2	27.42	1617	23.8	4681.87	2	59
50481	2	9.59	7.78	1.24	63.4	2	60	2	3	1	44.44	1448	0.016	1568.91	2	62
11760	2	8.95	6.56	0.856	63.5	1	61	1	1	2	29.44	1691	0.114	505.007	1	28
13907	2	7.19	4.57	0.58	63.5	2	85	3	3	2	26.28	1487	0.072	8483.39	2	23
21794	1	35.31	1.78	0.452	63.5	1	74	1	1	2	22.35	1527		656.851	1	39
22409	2	7.13	3.35	0.369	63.5	1	71	3	1	2	25.91	961	474	7136.15	2	31
31380	2	13.71	18.67	0.999	63.5	1	69	4	2	2	20.51	1174	471	1582.1	1	49
39839	1	11.07	8.52	0.509	63.5	1	75	4	3	2	29.24	1323	0.017	2569.67	1	51
18289	2	9.66	14.16	0.628	63.6	2	60	4	2	2	40.39	1356	0.011	7739.3	2	20
21307	2	12.28	6.78	1.148	63.6	2	72	3	5	2	25.12	1477	0.011	10471.4	1	29
47841	2	7.73	5.97	0.528	63.6	1	73	3	5	2	27.11	1302	21.3	8921.69	2	72
12064	2	10.5	4.92	0.879	63.7	1	62	5	4	1	28.9	1309	0.011	8495.95	2	23
14217	2	17.95	7.44	0.895	63.7	1	65	1	1	2	22.97	1168		532.813	2	15
29584	1	14.68	8.7	0.889	63.7	1	74	3	1	1	39.27	1373	0.036	14800.6	1	29
32943	2	8.65	6.26	0.97	63.7	2	63	4	2	2	20.49	1678	24.5	9465.13	1	55
43288	2	7.61	4.16	0.821	63.7	2	61	3	3	1		1351	269	8043.69	1	61
46604	1	11.43	7.45	0.851	63.7	2	62	4	3	1	54.38	1417	0.088	1911.89	1	59
48200	2	8.42	7.07	1.088	63.7	1	55	3	2	2	26.52	2238	0.202	3672.36	1	67
48696	1	15.8	6.2	1.988	63.7	1	80	3	4	2	24.7	1959	0.041	6231.51	2	67
50674	2	29.29	4.85	0.59	63.7	2	74	4	2	2	32.02	1236	157	4970.67	2	65
13367	2	8.68	4.6	0.663	63.8	2	85	2	1	2		1528	0.024	34858.3	2	27
23471	2	16.41	6.46	1.054	63.8	2	61	5	5	2	31.19	1393	0.011	6942.39	1	39
27163	2	6.82	5.17	0.765	63.8	1	65	1	3	2	30.55	1321	0.165	2665.41	1	31
32118	2	12.42	14.69	0.853	63.8	1	62	3	4	1	31.42	2464	1.41	12284.8	1	49
45815	2	15.62	4.41	0.564	63.8	1	67	3	1	1	24.29	1318	535	5679.3	2	59
51593	2	8.62	8.62	0.865	63.8	2	64	3	4	2	33.13	2223	255	20479.3	1	60
11403	2	8.94	4.34	0.989	63.9	1	64	1	1	1	26.33	1189	0.035	444.394	1	25
15702	1	8.75	5.59	0.698	63.9	2	85	4	2	2	22.61	1284	0.149	1691.4	1	24
28839	2	9.32	5.04	0.553	63.9	2	60	3	3	2	32.64	1214	156	33183.9	2	39
29969	2	11.98	6.82	0.872	63.9	2	85	3	4	1	26.41	1439	0.032	4396.12	2	31
33182	2	8.78	7.26	1.316	63.9	1	73	3	3	1	32.45	2332	0.277	4299.76	1	46
43441	2	9.97	4.36	0.487	63.9	2	63	3	2	2	32.66	897	0.127	7632.62	2	59
46258	2	13.46	5.77	0.68	63.9	2	62	1	1	2	28.1	1392	0.078	1139.19	2	72
50208	2	9.86	10.71	1.151	63.9	2	58	3	1	2	25.27	1771	0.018	13662.1	2	62
50927	2	16.45	12.25	0.926	63.9	2	77	3	3	2	20.09	1403	0.039	9912.04	2	61
10364	1	11.17	10.51	0.885	64	2	79	3	3	2		1895	0.112	12339.9	2	20
23039	2	9.86	5.61	0.929	64	2	68	4	1	2	24.06	1489	0.114	5663.13	1	30
32732	2	9.96	9.59	0.996	64	2	61	3	5	2	29.92	1857	0.091	32485.7	2	52
49401	2	18.48	5.84	0.488	64	2	57	3	4	2	36.07	1168	0.011	48582.8	2	61
50450	2	12.64	5.66	1.045	64	2	66	4	4	1	35.3	1539	0.223	1910.93	1	68
11592	2	11.39	10.35	1.982	64.1	2	55	4	2	2	27.52	1080	0.594	7550.26	1	27
13715	2	11.95	5.87	0.819	64.1	2	60	4	2	1	32.85	1614	93	5742.68	1	16
13834	2	13.83	7.19	0.867	64.1	1	55	4	3	2	25.64	2482	0.128	7036.22	1	16
14279	2	9.61	9.44	1.041	64.1	2	65	3	5	2	23.25	1274	0.067	15963.5	1	23
19132	2	9.88	6.34	0.891	64.1	2	64	3	3	2	30.83	1831	0.033	30450.4	2	16
29719	2	11.67	9.24	0.881	64.1	1	68	3	4	2	28.99	1909	0.179	7054.81	1	29
39873	2	10.47	3.21	0.528	64.1	2	57	4	4	2	35.12	1451	0.032	8346.28	2	45
40807	2	17.86	18.72	1.224	64.1	1	76	3	5	2	30.27	1643	0.011	6330.87	2	50
48348	2	7.73	5.83	0.9	64.1	1	55	4	5	1	27.87	1383		6644.7	1	67
18710	2	12.47	8.56	1.427	64.2	2	70	3	4	2	26.87	1756	0.011	6785.58	1	15
19238	2	13.67	6.72	0.455	64.2	2	52	4	2	2	33.17	923	0.179	7235.53	2	20
21099	2	12.08	7.48	0.566	64.2	1	75	3	3	1	40.41	1200	0.035	8527.56	2	39
24165	2	28.7	17.67	1.135	64.2	2	65	3	3	1	24.26	1314	0.011	12744.1	2	34
45360	2	11.71	5.71	1.341	64.2	1	63	3	3	2	29.04	1664	0.681	12507	2	59
45500	2	9.77	5.79	0.991	64.2	1	80	3	3	2	24.9	1177	392	4524.65	2	59
45520	2	9.15	6.68	0.446	64.2	2	78	3	2	2	29.64	1158	0.865	10592.7	1	61
18726	1	8.64	8.33	0.936	64.3	2	85	3	4	2	26.49	1318	0.011	3796.02	1	18
19461	2	7.45	9.32	0.579	64.3	1	66	3	1	2	34.78	1565	0.057	5300.89	2	22
25795	1	9.71	7.39	0.671	64.3	2	81	1	1	2	28.08	1082	0.033	785.603	1	34
37236	2	12.99	5.86	1.158	64.3	2	78	2	1	2	29.27	1911	0.017	16505.6	2	52
42029	1	39.65	38.26	1.66	64.3	2	71	3	2	2	27.94	1941	0.011	7433.43	2	62
42484	1	14.56	7.88	0.465	64.3	2	72	3	4	1	42.44	1475	0.079	8216.84	2	61
44208	2	12.61	7.56	1.424	64.3	1	67	4	4	1	33.24	1663	0.011	3221.74	2	67
47874	2	9.09	5.06	0.787	64.3	2	79	3	3	2	20.36	1196	0.873	4825.19	2	69
12157	2	8.64	8.24	0.705	64.4	1	57	2	2	2	21.92	1721	0.053	13771.6	2	25
18056	2	4.41	4.1	0.431	64.4	2	62	3	3	1	30.74	768	0.048	13452.3	1	21
49818	2	12.23	7.88	2.636	64.4	2	58	1	4	2	24.69	1494	0.011	7089.2	1	66
18848	2	5.25	4.99	0.542	64.5	1	69	4	4	1	28.77	1370	0.082	2743.66	2	18
22023	2	6.36	5.61	0.456	64.5	2	51	4	2	2	29.56	1908	314	18119.1	2	35
27722	2	12.78	10.91	0.945	64.5	1	60	1	4	2	29.86	1940	0.074	861.614	2	38
33271	2	14.33	3.83	0.607	64.5	1	68	4	1	2	23.02	840	0.055	6254.1	2	49
34062	2	8.87	10.15	0.663	64.5	2	67	3	5	2	43.3	1039	0.011	11219	1	55
36074	2	9.88	7.31	1.472	64.5	1	70	2	5	2	24.2	1450	0.099	8379.74	1	55
37765	2	5.29	3.4	1.025	64.5	1	73	4	4	1	33.08	788	0.037	1430.97	1	51
46692	2	35	18.76	1.411	64.5	1	78	3	3	2	26.14	1654	0.044	12661.9	2	63
16730	2	11.79	10.96	1.109	64.6	2	79	3	4	2	37.4	1259	0.011	8749.94	1	19
31454	2	8	4.18	0.446	64.6	1	75	2	1	1	25.19	1261	0.036	6298.61	2	49
48866	2	23.22	5.97	1.046	64.6	2	53	4	5	2	28.08	1288	0.04	3815.69	1	72
16729	2	6.68	4.98	0.492	64.7	1	85	2	1	2	24.31	990	0.115	3016.83	1	20
20696	1	6.28	2.17	0.49	64.7	1	65	3	1	2	30.23	1375	17	4668.61	1	15
22693	1	17.59	8.73	1.283	64.7	2	84	3	2	2	26.46	2009	0.476	7485.63	2	30
25123	1	18.7	13.9	1.524	64.7	2	65	3	2	2	24.33	2374	0.156	13675.6	2	34
23557	2	6.19	3.16	0.462	64.8	2	56	3	4	2	27.1	709	0.011	33787.9	2	30
30756	1	23.2	13.28	0.75	64.8	2	81	3	4	2	27.41	1362	0.065	5734.15	2	31
32697	2	13.9	8.17	0.582	64.8	1	67	3	3	2	33.99	992	0.436	11022	2	44
40382	1	19.77	10.98	1.979	64.8	1	83	3	4	2	28.79	2064	0.023	6034.35	1	44
40563	2	7.97	7	1.102	64.8	1	70	4	2	1	25.34	1430	0.026	1586.29	1	52
44164	1	12.3	5.59	1.282	64.8	2	80	3	1	2	25.9	1409	0.036	6102.27	2	70
50431	1	9.92	7.38	0.923	64.8	1	79	4	1	2	26.43	1351	0.028	2624.96	1	59
33420	2	9.09	10.61	1.581	64.9	2	74	3	5	1	28.73	1379	0.011	8204.76	2	50
45211	1	15.34	9.95	1.245	64.9	1	80	3	3	2	32.81	1637	0.049	3297.03	2	61
51029	2	10.58	11.96	0.894	64.9	2	80	3	5	2	31.57	2360	0.048	7217.88	2	62
10781	1	12.11	7.99	0.856	65	1	75	3	4	1	33.72	1660	0.011	11345.1	2	20
20670	2	13.56	11.95	0.89	65	2	77	2	3	2	25.95	1415	0.026	17176.8	2	27
23136	2	11.58	6.67	0.852	65	2	72	3	3	2	24.73	1825	4.7	11868.7	1	29
23932	2	8.21	5.7	0.624	65	1	69	2	1	1	30.45	942	0.171	17037.1	2	36
25486	2	9.87	7.34	1.088	65	2	76	4	3	2	33.89	1783	559	10661	1	36
36415	1	19.54	13.38	0.949	65	2	85	3	3	1	33.87	1346	0.021	7367.59	2	46
38850	2	8.35	6.57	1.149	65	2	61	5	4	2	24.24	1200	0.094	2624.87	1	55
43318	2	7.69	3.37	0.832	65	2	63	3	4	2	25.47	846	528	13611.5	1	60
46861	2	12.38	8.16	0.884	65	2	63	3	5	2	24.06	1345	252	15260.5	2	64
50040	2	15.22	13.56	2.018	65	2	56	3	5	2	25.61	1516	0.011	44476.9	1	60
17954	2	18.37	5.21	1.129	65.1	2	76	3	3	2	22.15	1359	0.011	7585.81	2	18
21069	2	5.42	6.51	0.344	65.1	1	70	1	1	2	23.36	849		698.636	1	40
26908	2	10.16	10.91	0.631	65.1	1	73	3	5	2	29.78	1100	0.011	5556.87	2	29
31593	2	7.56	4.91	0.89	65.1	2	58	1	3	2	28.62	1167	0.379	2940.9	1	57
42788	2	6.81	5.73	0.444	65.1	2	71	3	5	2	34.06	987	0.231	6684	1	70
49250	2	25.11	12.39	1.453	65.1	2	65	4	3	1	20.96	1729	0.18	4506.37	2	67
51501	2	11.23	9.07	1.651	65.1	2	67	3	3	2	23.01	1615		11458.6	1	60
25960	2	7.8	4.15	0.729	65.2	2	60	3	5	2	24.66	1131	308	5183.67	2	30
26002	2	10.79	5.86	1.131	65.2	2	67	1	3	1	30.07	1682	65	1407.83	1	42
26917	1	19.92	4.96	0.874	65.2	2	82	3	3	2	33.11	1933	0.011	4465.59	2	40
34015	2	12.1	11.27	2.116	65.2	2	76	3	3	2		1620	0.048	7502.75	1	48
35181	2	20.08	16.4	2.756	65.2	2	66	3	4	1	27.44	1784	78.2	10678.1	2	44
41654	2	9.13	6.52	1.041	65.2	2	80	3	1	2	24.56	1230	0.011	7199.71	2	74
14076	2	16.69	4.28	0.43	65.3	2	75	3	5	2	30.96	989	0.011	9918.82	2	17
19820	2	9.71	8.44	0.956	65.3	1	72	1	1	2	26.51	1825	168	1373.48	2	27
23705	1	7.65	9	0.605	65.3	2	70	3	3	1	26.93	1502	0.011	7696.2	1	33
27411	1	47.07	34.6	0.937	65.3	2	85	3	4	2	22.9	1513	0.056	5387.28	1	29
35203	2	19.1	10.31	0.999	65.3	2	72	3	3	2	18.56	1325	0.011	8204.76	2	50
37278	2	25.35	12.49	1.036	65.3	1	77	3	1	1	26.07	1999	0.022	6332.83	2	48
37754	1	6.13	3.32	2.113	65.3	1	82	3	3	2	32.41	855	0.027	3113.96	1	45
42307	1	8.34	8.92	0.785	65.3	2	66	3	3	1	33.36	1537	0.047	16937.7	2	60
44941	2	13.51	5.88	0.884	65.3	2	64	3	5	2	23.87	1694	0.011	23824.6	1	64
45152	2	7.88	7.86	1.199	65.3	2	64	2	1	2	27.15	1304	0.038	1199.65	2	70
48494	1	11.29	6.56	1.441	65.3	1	80	3	1	2	33.87	1851	0.121	3444.01	2	60
51241	2	9.82	5.75	0.737	65.3	2	60	4	3	2	27.29	1841	296	1810.19	1	59
15097	2	9.04	9	0.987	65.4	2	61	1	1	1	29.14	1531	0.04	2257.38	1	22
29945	1	8.78	8.88	0.678	65.4	2	64	4	5	1	29.29	1283	0.02	3886.73	1	38
44385	1	5.49	7.17	0.383	65.4	1	78	2	1		34.64	1155	0.029	2678.11	1	72
45295	2	22.54	7.65	1.036	65.4	1	74	3	5	2	31.01	2021	0.218	2147.56	2	59
46262	1	13.29	4.92	0.698	65.4	1	80	3	5	2	26.56	1548	0.062	4233.4	1	67
48501	2	9.95	8.12	0.789	65.4	2	76	3	2	2	28.95	1675	0.016	6508.52	1	61
49187	2	10.97	11.14	1.605	65.4	1	76	3	2	1	27.88	1642	0.312	2004.26	2	64
50565	2	11.27	11.4	1.3	65.4	2	70	4	3	1	46.97	1382		2626.91	1	64
14556	2	15.29	9.63	0.852	65.5	1	81	3	2	2	20.65	1440	199	1839.12	1	23
21063	2	8.32	7.66	0.945	65.5	1	69	1	1	2	31.45	1460	0.035	1330.47	2	40
31992	2	26.01	10.58	1.209	65.5	1	81	3	4	2	25.54	1483	0.011	12803.3	2	47
39354	2	7.2	4.51	0.431	65.5	1	54	4	5	2	24.29	1674	0.075	2747.42	1	44
46397	2	8.81	6.4	0.701	65.5	2	58	4	2	2	27.12	1952	564	3127.68	2	68
13505	2	13.39	17.18	1.005	65.6	1	63	1	1	2	27.75	1041	0.011	235.454	2	25
17783	2	6.75	8.76	0.455	65.6	1	56	4	3	2	25.25	1274	214	17290.4	2	15
19160	2	11.91	5.79	0.67	65.6	2	77	3	4	1	29.09	1406	0.011	6800.36	1	23
22472	2	21.95	20.41	0.818	65.6	2	60	5	4	2	23.9	1633	119	12062.1	1	31
31309	2	9.2	12.04	0.572	65.6	1	60	1	1	2	31.98	1086	0.79	1295.63	1	48
42085	2	7.7	4.46	0.791	65.6	2	57	3	2	2	17.85	2418	307	5500.41	2	71
43186	1	15.27	8.64	3.174	65.6	1	67	3	4	1	32.72	1776	0.015	11381.4	2	64
36223	2	7.5	4.71	0.883	65.7	1	71	1	2	2	27.66	858	0.593	1604.83	2	54
46144	2	27.61	11.21	1.539	65.7	1	75	3	3	2	22.21	2402	0.423	2674.83	2	60
49728	2	19.21	11.34	0.748	65.7	1	73	3	3	2	22.59	1453	0.083	10828.8	2	60
50762	1	17.8	7.15	1.734	65.7	2	71	3	2	2	23.48	2046	0.045	4886.64	2	59
10096	2	17.39	12.66	1.092	65.8	2	60	3	3	2	26.24	1291	0.011	21079.1	1	19
30349	2	8.28	10.73	0.715	65.8	1	55	3	3	2	28.19	2361	0.025	43180.6	1	39
38575	2	11.29	14.58	0.81	65.8	1	66	3	4	2	32.76	1133	329	14647.6	1	49
42291	2	29.17	13.39	2.666	65.8	2	70	3	5	2	38.2	1791	0.024	9833.24	2	66
46764	2	7.91	3.34	0.479	65.8	2	64	4	4	2	18.47	1019	344	3417.19	1	68
13955	2	8.84	6.74	1.136	65.9	2	68	3	2	1	30.41	1271	0.011	10367.6	2	21
15520	2	6.69	8.96	0.632	65.9	2	85	5	1	2	24.94	965	0.011	9051.31	2	20
21305	2	14.84	15.38	1.208	65.9	1	75	3	5	2	31.34	1364	0.011	11150.5	2	30
33277	1	13.55	5.21	0.967	65.9	2	77	4	1	2	35.31	1934	539	2849.78	1	55
38427	2	8.42	7.32	0.915	65.9	1	77	4	2	2	30.96	1236	0.011	3521.57	1	52
40425	2	10.66	8.42	1.404	65.9	1	82	1	1	2	31.95	1506	0.947	3548.16	1	57
43484	2	9.49	12.51	0.721	65.9	2	61	4	2	2	25.67	1803	590	2740.76	2	67
43594	2	9.58	12.07	1.991	65.9	1	55	1	3	2	31.4	2403	0.465	4725.47	1	74
46768	2	12.76	12.48	2.061	65.9	2	59	3	5	2	26.57	1784	237	38897.5	2	63
48407	1	19.06	15.08	2.023	65.9	2	80	4	1	1	28.22	1443	241	2952.54	1	59
10373	2	5.44	2.96	0.745	66	2	61	4	2	2	28.94	1094	0.21	2235.42	1	21
13525	2	8.16	4.67	1.006	66	1	70	3	4	2	28.34	1214	0.016	11408.4	2	15
19798	2	9.06	7.84	0.967	66	2	58	3	3	1	39.85	1164	0.119	16702.1	1	21
22546	1	10.01	5.25	0.957	66	2	75	4	2	2	22.42	1811	0.276	3659.45	1	36
28894	2	24.37	12.41	1.486	66	2	85	4	1	2	21.89	1402	0.231	4018.45	1	36
29088	2	11.58	7.81	0.819	66	2	61	1	3	1	44.12	1804	0.027	433.197	2	40
42003	1	7.37	4.84	0.638	66	1	68	1	1	2	25.31	1198	48	3773.64	1	66
44984	1	15.84	12.37	0.856	66	2	80	2	3	1	17.8	902	0.011	1808.19	1	66
46814	1	6.54	4.23	1.207	66	2	71	3	1	1	44.5	1198	0.071	7325.8	1	61
47621	2	8.93	7.42	0.545	66	2	58	1	2	1	37.84	1253	0.13	1660.77	2	64
47671	2	11.04	12.88	0.723	66	2	59	3	3	2	23.56	1374	0.093	44809	2	67
10040	1	14.47	6.83	0.689	66.1	2	76	4	2	2	47.88	1445	0.051	1450.08	1	21
20834	2	15.56	9.3	1.758	66.1	1	66	3	5	2	29.96	2929	0.011	16529.4	2	17
21978	2	7.42	6.92	0.753	66.1	2	84	3	3	2	25.75	1707	0.026	5088.02	2	35
27689	2	9.62	3.92	0.931	66.1	2	82	3	3	2	20.73	1076	0.011	9630.85	1	29
36279	1	21.18	18.18	1.745	66.1	2	76	3	3	2	25.02	2192	0.328	13099.9	1	44
36296	2	8.04	4.71	0.831	66.1	2	51	4	5	1	57.62	1216	3.12	3059.85	1	44
38798	1	10.5	12.03	1.499	66.1	2	59	3	5	2	19.05	1698	0.019	17866.3	2	48
47303	2	7.43	6.29	0.812	66.1	2	56	2	1	2	33.6	1061	0.026	1443.71	1	62
11711	2	20.53	16.18	1.236	66.2	1	74	3	5	2	25.96	1790	119	10640.6	1	14
13571	1	7.73	7.72	0.577	66.2	2	85	3	1	2	23.88	1608	0.047	9689.14	2	23
16662	2	7.39	5.84	0.889	66.2	2	64	3	4	1	32.97	1197	0.011	17434.1	2	17
24751	2	10.35	5.72	0.965	66.2	2	76	3	4	2	25.66	1453	0.059	13308.9	2	37
25690	2	11.44	8.38	1.049	66.2	1	72	3	1	2	18.62	1820		2925.73	2	39
28542	1	11.13	8.55	0.866	66.2	2	85	3	1	1	29.82	1723	152	5705.06	1	37
31227	2	37.14	29.18	1.729	66.2	1	64	3	5	2	23.32	1659	0.054	13105	2	48
40705	2	7.92	3.94	0.623	66.2	1	72	4	2	2	28.5	1378	503	3722.92	2	49
44622	2	10.11	10.89	1.375	66.2	2	80	3	4	2	23.16	2082	0.011	15199.2	1	69
46619	1	8.52	7.51	0.792	66.2	1	79	3	3	2	27.97	1399	0.05	6751.1	1	69
14633	2	9.2	5.73	0.616	66.3	2	56	1	2	2	33.97	1612	252	1693.13	2	17
15789	2	6.97	5.26	0.76	66.3	1	65	3	4	1	30.82	975	2.3	8694.15	1	19
23722	2	9.94	3.54	0.331	66.3	2	63	4	1	2	27.41	1500	0.078	6424.22	1	37
29448	2	7.81	7.36	0.347	66.3	1	71	1	1	2	24.1	1174	0.169	662.74	2	38
35475	2	8.26	8.84	1.082	66.3	2	67	3	4	2	33.91	1042	0.063	21953.5	1	44
42042	2	9.75	7.47	0.947	66.3	1	76	2	1	2	23.6	1303		2912.57	2	62
45491	2	8.05	7.27	0.823	66.3	1	78	3	1	1	26.06	1516	0.018	5906.33	2	59
46961	2	14.43	11.57	1.049	66.3	2	74	3	1	1	36.15	1304	0.071	9218.89	2	61
48040	2	8.79	7.93	0.619	66.3	2	62	4	3	1	25.43	808	673	1732.33	1	74
26105	2	10.69	6.02	0.963	66.4	1	65	2	3	2	25.7	1537	0.056	15559.8	2	36
27041	2	7.24	5.45	1.313	66.4	2	57	3	1	1	25.97	1808	0.094	14273.6	2	31
31123	1	16.43	8.59	0.929	66.4	2	83	3	3	2	23.47	1448	0.011	4363.97	1	39
35802	1	5.87	4.94	0.815	66.4	1	76	3	3	2	28.26	816	0.022	7928.33	2	53
37027	2	6.62	5.52	0.412	66.4	2	59	1	4	2	27.45	1597	0.117	2066.16	1	48
50554	2	6.02	6.49	0.701	66.4	2	62	4	5	2	33.62	1002	0.031	3587.64	1	65
11801	1	12.16	7.85	1.086	66.5	1	80	3	3	1		1512	0.069	4728.54	2	22
18954	1	12.38	6.24	0.658	66.5	2	71	1	1	1	24.5	1238	0.011	1443.75	1	15
19669	2	12.82	9.27	1.164	66.5	1	67	1	2	2	26.95	2156	117	2019.54	1	25
20102	2	9.44	4.61	0.564	66.5	2	80	1	1	2	20.65	1559	0.158	1531.59	2	27
27184	2	32.67	23.53	1.401	66.5	2	60	3	3	2	50.75	1682	0.087	5149.98	2	34
37429	2	6.57	6.58	0.733	66.5	2	57	5	4	2	32.18	996	0.011	11902.6	2	44
38500	1	11.25	7.56	1.261	66.5	1	65	4	2	1	32.67	1519	175	3266.61	2	50
42200	2	11.88	12.34	0.822	66.5	1	65	3	3	1	33.45	1502	0.038	14534	1	64
44462	2	14.23	9.69	0.938	66.5	1	75	3	5	2	33.2	1487	230	3618.94	2	66
10073	1	7.32	6.92	0.532	66.6	2	71	3	5	2	25.19	1323	375	7894.45	1	26
15351	2	12.17	6.3	0.8	66.6	1	80	1	1	1	25.65	1237	0.038	480.627	1	17
17107	2	24.92	9.55	0.835	66.6	1	85	3	1	1	30.25	1169	0.03	2107.52	1	19
20185	2	7.31	5.63	0.597	66.6	2	57	3	5	2	37.11	1033	0.023	9821.39	1	23
28962	1	19.63	8.42	0.944	66.6	1	85	3	4	2	40.11	1485	0.011	4012.47	1	39
28981	2	13.78	8.02	1.937	66.6	1	61	3	4	1	31.24	2693	200	24850.8	1	31
29073	2	20.14	12.14	1.165	66.6	2	71	3	3	1	32.51	1502	0.011	12383.6	1	38
29086	2	8.4	7.01	0.645	66.6	2	73	1	1	2	26.64	1509	0.019	944.745	2	40
29464	2	8.38	6.36	0.451	66.6	2	72	3	2	2		1225	68.8	21017.2	2	42
37066	1	19.73	8.52	1.034	66.6	1	67	3	3	1	26.77	1469	0.437	28664.7	1	50
37522	2	14.13	12.97	1.023	66.6	2	66	3	3	2	26.59	1373	0.025	19483.1	2	49
37712	2	6.21	11.26	0.676	66.6	1	70	2	1	2	27.55	820	0.026	4946.06	2	45
39142	2	9.38	11.49	0.85	66.6	2	61	4	1	1	57.04	1150	0.011	2361.93	2	53
39920	2	28.48	13.95	1.904	66.6	2	85	3	4	2	22.46	2058	0.011	9339.36	2	50
40604	2	11.45	9.56	0.454	66.6	2	63	1	1	1	22.45	1147	0.252	796.793	1	57
46883	2	8.47	7.09	1.295	66.6	2	55	1	2	2	26.92	1089	0.011	2921.97	2	63
48362	2	8.05	5.8	1.485	66.6	1	60	3	5	2	28.51	1363	0.011	14168.8	1	71
50278	2	9.45	3.36	0.518	66.6	2	63	4	4	1	30.63	1001	0.017	2836.2	1	68
16182	2	9.57	9.58	0.782	66.7	2	74	3	3	2	27.41	1740	0.519	5251.46	2	22
17515	2	8.03	8.04	0.597	66.7	2	71	3	3	2	29.44	1048	0.068	7041.5	1	18
18122	2	12.21	7	1.611	66.7	2	60	4	4	2	36.66	1956	0.035	10423.9	1	24
29716	2	16.39	11.63	0.803	66.7	2	73	3	1	2	26.06	1328	0.011	7307.91	2	31
34396	1	9.5	6.99	1.198	66.7	2	69	4	2	2	37.78	1882	0.204	1669.08	1	44
39060	2	15.62	12.6	1.228	66.7	2	75	3	2	2	17.4	1443	109	7356.47	1	49
46087	2	6.58	5.7	0.762	66.7	2	57	2	2	2	40.41	1091		2109.4	2	61
48502	2	25.62	12.45	1.249	66.7	1	57	3	5	2	26.91	2454	0.011	31773.2	2	62
49391	2	14.03	12.24	2.197	66.7	1	59	4	4	2	33.38	2448	0.034	7319.73	1	63
15461	2	15.23	9.82	0.667	66.8	1	58	3	5	1	29.77	1047		15807.4	2	18
26420	2	17.78	10.92	1.051	66.8	2	77	3	1	2	27.43	1357	0.022	8224.71	1	29
37668	1	15.92	8.17	1.319	66.8	2	83	3	3	2	27.34	1731	2.25	6610.52	1	45
41230	2	12.21	10.96	0.756	66.8	2	73	1	3	2	24.91	1000	0.011	2199.66	2	58
47668	2	8.27	6.91	0.931	66.8	2	68	4	2	2	27.49	1590	0.017	3094.43	2	65
50635	2	4.58	6	0.568	66.8	2	63	2	1	2	25.63	837	0.067	2236.15	1	72
23653	2	6.66	5.59	0.728	66.9	2	75	3	3	2	27.11	1002	0.026	22123.9	2	35
24526	2	9.27	7.2	0.876	66.9	2	64	4	4	2	34.47	1180		2784.45	1	30
29185	2	11.64	6.32	1.378	66.9	2	63	3	4	2	22.43	1679	0.02	9900	2	32
30764	2	7.8	9.39	0.747	66.9	2	59	3	4	1	38.43	1017	0.055	34245.3	2	36
34538	2	15.36	13.34	1.156	66.9	1	76	3	3	2	23.91	2395	107	9783.9	2	47
43861	1	9.74	7.44	0.654	66.9	2	80	3	4	2	28.86	1226	0.011	11304	2	60
19115	2	7.09	6.22	0.446	67	1	73	3	2	2	29.12	1314	217	13259.1	1	27
25410	2	10.94	8.01	0.919	67	2	64	4	4	1	34.08	2983	0.011	1926.9	1	36
33328	2	16.07	5.86	0.429	67	1	52	4	3	2	22.63	1848	813	10793.6	1	52
46491	2	19.93	12.61	1.681	67	1	78	3	2	1	23.38	1601	0.299	5929.39	1	59
49212	1	9.76	6.09	1.266	67	1	77	3	5	2	25.66	1566	0.051	1458.1	1	62
12282	2	13.49	12.51	0.768	67.1	1	81	3	5	2	21.73	1110	0.019	4330.42	1	21
16993	2	10.66	12.49	0.388	67.1	2	56	4	2	2	25.62	1296		2259.95	2	26
18016	2	21.79	10.22	1.333	67.1	2	72	3	3	2	23.24	1484	0.011	9971	1	23
23367	2	17.05	4.79	1.019	67.1	1	69	3	3	2	24.01	1297	0.022	4916.76	1	40
26887	2	9.8	7.56	0.904	67.1	1	59	1	2	1	31.34	1574	0.039	9060.33	2	42
29252	2	6.61	4.84	1.034	67.1	1	77	4	2	2	24.74	2083	2.64	1593.15	2	42
29940	1	9.12	11.46	0.88	67.1	2	85	3	1	1	27.68	1845	0.048	4949.87	2	31
30263	2	11.9	8.5	0.692	67.1	1	77	3	3	2	27.38	1569	0.027	3570.59	2	32
32711	2	12.43	9.23	1.342	67.1	2	60	1	1	2	34.71	1486	0.011	1290	2	58
34186	2	16.92	12.5	2.116	67.1	2	60	3	3	2	37.72	2781	0.023	15556.2	2	48
45823	2	9.67	4.03	0.969	67.1	2	78	5	5	2	28.1	2102	0.025	4627.7	1	73
15903	2	27.48	49.57	2.117	67.2	2	52	4	3	2	32.13	2225		7237.19	1	16
22350	2	33.65	12.19	1.748	67.2	1	78	3	2	2	24.03	1825	0.011	5202.21	2	31
41871	1	17.59	12.54	0.918	67.2	2	65	3	4	2	19.65	2485	0.011	13358.7	2	62
49331	2	7.54	7.53	0.932	67.2	2	65	4	2	2	27.77	861	0.437	3945.34	2	65
13826	2	10.68	4.25	0.786	67.3	2	58	3	5	2	34.66	1520	0.316	19280.9	2	26
22429	2	13.28	7.78	1.445	67.3	2	85	4	2	2	24.43	2510		2042.06	2	29
25457	2	9.74	8.7	0.719	67.3	2	56	4	3	2	35.78	1500	0.025	18257.5	1	37
27032	2	8.02	8.34	0.448	67.3	1	63	4	3	2	29.51	1105	46.2	1988.99	1	36
30647	2	9.87	5.19	0.957	67.3	2	63	4	3	2	38.55	1779	20.1	2653.66	2	36
32355	2	13.83	6.8	1.507	67.3	1	63	1	1	2	32.6	1879	99.3	3077.28	2	56
32428	2	9.56	5.77	0.763	67.3	2	63	3	3	2	20.23	1266	0.093	14654.6	2	47
44514	2	19.96	12.66	2.394	67.3	2	58	3	5	2	24.44	1672	0.011	12072.9	1	70
48718	2	6.77	5.59	0.974	67.3	2	80	3	4	2	31.56	1477	0.021	10325.1	1	61
10390	2	9.43	8.6	1.249	67.4	1	57	2	5	1	27.27	1560	387	13141.5	2	27
11600	1	6.96	8.28	0.788	67.4	2	61	1	1	1		1277	0.08	5640.82	2	27
11995	1	10.35	11.31	0.982	67.4	1	79	3	3	2	27.08	2152	0.042	5637.88	1	16
33197	2	9.31	9.08	0.86	67.4	2	85	3	4	2	26.15	1597	0.18	6986.53	2	46
34091	1	10.93	7.33	1.38	67.4	1	69	5	5	2	24.15	1745	0.028	15490.9	1	57
37241	2	12.03	6.74	1.289	67.4	2	57	3	5	2	24.19	1622	0.011	13416.3	2	46
45223	1	9.13	5.61	0.684	67.4	2	61	4	2	1	35.79	1229	0.054	3110.31	1	68
47286	2	5.2	4.61	0.485	67.4	1	60	4	3	1	27.72	1285	163	1885.98	1	68
11062	2	8.8	5.16	0.614	67.5	2	51	4	3	2		1226		2940.19	1	27
13073	2	12.44	7.05	1.219	67.5	1	55	4	4	2		2827	182	4794.14	2	26
19975	2	9.93	8.3	0.848	67.5	2	60	3	3	2	25.2	1416	118	20374.8	2	15
20549	1	6.62	7.08	0.755	67.5	2	79	3	2	2	29.36	1412	0.011	15734.2	2	19
22682	2	10.08	6.37	0.964	67.5	1	78	3	2	2	28.88	1620	0.123	8572.04	2	31
25727	2	8.46	14.25	0.483	67.5	1	66	3	5	2	29.64	1206	0.015	10102.2	1	37
25915	2	25.58	9.82	1.371	67.5	2	70	5	5	1	28.43	1590	0.046	15092.4	2	34
41881	2	8.17	5.42	0.962	67.5	1	70	3	3	2	29.87	1641	0.278	7693.37	2	60
43997	1	9.04	4.76	0.72	67.5	1	60	2	5	2	31.09	1561	0.011	1617.83	2	62
45534	2	5.61	5.39	0.809	67.5	2	55	4	4	1	52.91	1307	252	4079.04	1	64
14152	2	18.13	11.78	0.643	67.6	2	61	4	4	2	48.18	1387	0.055	5146.62	2	20
17211	2	13.17	10.25	1.375	67.6	2	65	3	5	2	24.66	1446	0.066	16079.9	1	23
21036	1	8.47	7.41	0.775	67.6	2	85	3	2	2	23.37	1506	0.076	4617.78	1	38
39470	1	7.07	5.72	0.338	67.6	1	76	4	2	1	26.9	1131	0.033	4417.9	2	56
43458	2	11.53	6.57	0.691	67.6	2	62	1	1	2	27.58	1111	0.011	1943.54	2	65
44633	2	15.14	8.86	1.381	67.6	1	60	3	5	1	27.49	2075	0.022	12354.9	1	67
46187	2	5.08	3.01	0.464	67.6	1	56	2	1	1	29.76	783	467	6059.09	2	62
12511	1	9.07	6.1	0.992	67.7	1	69	3	4	2	30.14	2086	0.011	8123.52	1	22
20306	1	10.99	9.1	0.535	67.7	2	69	4	2	1	28.63	953	182	3388.47	1	21
32991	1	10.57	8.59	0.671	67.7	2	64	3	4	2	33.52	1576	0.084	19483.1	2	49
41043	2	8.42	10.93	1.334	67.7	2	71	3	4	2	43.4	2415	0.083	22694.5	1	47
44621	2	12.11	8.2	1.034	67.7	2	55	4	5	2	29.51	1826	0.011	9881.48	1	62
21860	1	14.59	7.65	1.133	67.8	1	83	3	1	1	21.97	1971	248	5392.48	2	34
22183	2	9.06	9.35	0.793	67.8	2	72	3	4	2	22.7	1529	0.026	20165.9	1	31
49876	1	11.25	16.15	0.915	67.8	2	80	3	4	2	27.62	1515	0.011	7671.79	2	59
49924	1	14.22	6.87	1.209	67.8	2	77	1	1	2	30.94	1785	0.02	4833.06	2	65
51560	2	15.82	8.62	1.388	67.8	1	68	4	3	2	36.91	2095	0.06	1464.03	1	71
11423	2	7.47	5.04	0.569	67.9	2	64	1	4	2	33.27	1214	0.011	4574.73	2	15
17884	2	16.45	10.92	0.778	67.9	2	63	4	2	2	43.47	1444	0.038	2719.51	1	21
27504	2	16.39	7.92	0.374	67.9	1	75	3	4	1	31.04	977	0.011	8298.18	2	39
32442	2	10.97	11.99	1.81	67.9	1	72	1	1	2	23.73	1673	0.026	2130.91	1	56
38444	2	6.74	7.55	0.728	67.9	2	59	4	4	1	31.3	1391	272	8959.94	1	48
39783	2	10.45	10.4	0.792	67.9	1	68	4	5	2	33.17	1673	0.033	4143.96	1	49
40888	2	9.25	7.41	1.398	67.9	1	66	1	1	2	32.9	1789	0.011	2034.29	2	58
46495	2	11.41	11.19	0.93	67.9	2	75	3	4	2	26.34	1489	0.015	7614.87	2	62
48451	2	8.91	7.62	1.125	67.9	2	61	3	2	2	34.75	1531	1.21	9103.82	1	67
19479	2	9.25	5.85	0.793	68	2	72	1	1	2	23.54	1766	0.074	1767.75	2	27
27257	2	10.31	8.97	0.78	68	2	76	4	5	2	31.92	1637	0.018	4840.64	1	42
28281	2	10.92	8.36	1.219	68	2	55	3	3	2	27.24	1510	0.011	31406.1	1	35
34213	2	11.34	8.49	1.019	68	1	78	3	5	2	28.52	1502	0.011	13813.5	2	52
34329	1	8.61	10.21	1.069	68	2	80	3	3	2	21.66	1166	0.12	11596.4	2	47
35420	2	10.07	7.3	1.105	68	1	64	3	4	1	37.82	1644	0.036	6590.38	1	46
36058	2	8.18	33.29	1.904	68	2	69	4	2	2	41.61	632	156	6443.05	2	50
36843	1	14.32	8.2	0.605	68	1	81	3	1	1	35.86	997	0.041	4971.29	2	46
42123	2	22.77	7.18	0.741	68	1	61	2	4	2	26.51	1053	0.162	1252.8	1	71
51054	2	14.3	5.68	1.019	68	2	63	3	3	2	40.12	1403	0.042	12941.6	2	64
17961	2	11.36	7.02	0.804	68.1	1	58	3	5	2	19.64	1765	0.035	14631.2	1	24
19055	1	9.11	7.54	1.024	68.1	1	85	3	1	1	18.32	1602	0.011	2145.05	2	25
19291	2	13.4	7.4	0.558	68.1	2	85	3	3	2	20.9	1306	251	2887.66	2	21
19355	2	16.37	11.95	1.43	68.1	1	56	3	5	2	31.19	2291	0.011	13230	2	19
21456	1	15.28	8.06	1.274	68.1	1	84	3	5	1	31.79	1361	0.151	1819.73	1	30
28207	2	5.14	1.67	0.262	68.1	1	75	4	1	2	24.95	705	74.3	3365.23	2	42
39064	1	8.52	6.99	0.828	68.1	1	81	3	5	1	28.93	2377	0.023	6455.38	2	50
44599	1	13.16	6.45	1.125	68.1	2	80	3	4	2	26.87	1276	0.029	7740.2	1	61
47212	2	9.21	9.44	0.542	68.1	2	58	4	1	1	29.97	1283	743	3448.36	1	67
50140	2	12.13	11.45	1.265	68.1	2	75	1	2	2	39.97	1528	0.011	4493.09	1	66
30054	1	9.85	8.67	0.841	68.2	1	85	3	2	2	26.34	1805	175	3221.56	1	33
31894	2	17.17	15.4	2.058	68.2	2	61	1	4	1	32.96	2369	0.011	564.44	1	55
34843	2	16.93	10.76	0.904	68.2	1	79	3	2	2	27.05	1411	103	3105.17	1	49
41477	2	9.09	5.77	0.85	68.2	1	71	3	3	1	30.05	914	0.011	2262.53	1	67
44569	2	13.72	10.27	1.73	68.2	1	66	3	3	2	26.49	1899	0.021	3915.17	1	67
44823	1	8.02	8.13	0.658	68.2	1	79	3	3	2	34.01	1199		5831.48	2	63
47121	2	10	9.94	0.751	68.2	2	56	1	1	2	36.59	1589	48.8	1246.28	1	70
21033	2	4.94	2.72	0.464	68.3	2	57	4	3	2	32.07	1042	0.178	5927.16	1	41
25629	2	13.14	13.14	2.16	68.3	1	57	3	4	2	39.36	2219	0.022	16560.9	2	32
30393	2	7.24	4.39	0.498	68.3	2	66	2	2	2	26.6	1020	0.011	5056.9	1	36
44556	2	20.41	6.54	0.86	68.3	1	64	1	1	1	30.52	935	0.011	1589.27	2	70
49505	2	4.51	4.81	0.441	68.3	1	80	2	5	2	26.55	796	0.011	2386.68	1	66
13609	2	13.14	14.35	0.75	68.4	2	57	1	3	2	23.03	1378	0.011	11821.6	2	23
21907	2	7.42	7.89	0.638	68.4	1	71	3	4	2	23.46	1257	6.28	6968.36	1	35
24755	2	11.46	3.44	0.406	68.4	2	79	3	3	2	26.92	1104	0.141	9163.49	1	37
41106	2	7.63	4.71	0.613	68.4	1	73	4	1	1	29.47	1458	176	1510.03	1	48
42297	2	7.69	6.15	0.951	68.4	2	65	3	3	1	26.59	1313	0.033	13311	1	61
48964	2	11.95	5.81	1.356	68.4	2	68	3	3	2	27.23	1240	205	16829.3	2	70
50975	2	5.78	7.93	0.489	68.4	1	70	1	2	2	39.18	826	0.057	4841.66	2	72
51287	2	11.76	5.47	0.592	68.4	2	70	3	4	2	29.15	861	0.011	7861.63	2	60
10330	1	6.4	5.97	0.797	68.5	2	71	1	3	2	28.29	1022	0.266	1560.04	2	15
22226	2	17.97	6.02	0.919	68.5	2	60	1	1	2	26.41	995	0.011	635.282	1	39
12947	1	6.76	5.67	0.709	68.6	2	72	1	1	1	24.56	1377	0.017	836.136	1	28
18617	2	16.68	6.95	1.521	68.6	2	67	3	2	2	26.21	1599	0.011	21555.3	2	19
18728	2	13.51	8.54	0.7	68.6	2	79	3	1	2	21.33	1194	0.011	7538.61	2	21
18973	2	12.99	11.73	1.391	68.6	2	69	3	5	2	23.34	2197	0.011	14517.7	1	23
22444	2	6.66	6.6	0.598	68.6	1	78	1	3	2	23.07	1234	187	1265.98	2	43
25350	2	9.82	7.15	0.728	68.6	2	73	3	2	2	23.98	1321	0.263	14078.4	2	34
36518	2	12.45	8.53	1.875	68.6	1	63	3	2	2	25.66	2206	312	52625.6	2	55
38207	2	8.66	5.33	0.616	68.6	1	60	4	2	2	25.58	1866	0.13	2939.3	1	49
38903	2	6.1	5.25	0.629	68.6	1	66	1	1		27.79	839	0.011	500.634	1	56
41702	2	11.77	11.22	0.725	68.6	2	55	4	3	2	45.13	2110	0.055	8143.58	1	59
51044	2	11.15	5.83	1.178	68.6	2	63	3	4	2	44.07	1654	0.021	10965.3	2	68
15895	2	32.92	23.63	3.622	68.7	2	60	3	4	2	24.32	1312	0.064	19770.2	1	14
16447	2	11.78	4.71	0.988	68.7	1	66	3	5	2	27.29	2130	0.064	13633	2	26
16833	1	8.49	4.45	0.579	68.7	1	85	3	3	2		1157	0.055	9432.3	2	19
18842	2	9.05	3.39	0.824	68.7	2	84	3	3	2	19.74	1110	0.041	5758.88	2	21
20673	2	12.79	7.9	1.334	68.7	2	70	4	5	2	28.34	1693	0.019	2602.5	2	18
23166	2	14.35	11.63	2.52	68.7	2	70	3	1	2	37.46	2453	0.246	10818.5	2	30
23820	2	8.13	7.64	0.806	68.7	2	74	1	1	1	24.07	1189	0.011	1016.59	2	42
29480	2	12.42	3.97	0.728	68.7	2	56	1	2	2	39.89	1763	0.011	2674.15	1	34
31213	2	17.65	8.96	1.211	68.7	2	53	4	2	2	26.38	1807	0.024	3589.07	1	52
35818	1	4.73	5.26	0.962	68.7	1	85	3	3	2	30.51	1576	0.489	3276.77	2	44
40598	2	8.12	6.5	0.991	68.7	2	69	4	3	1	32.35	949	824	4224.64	2	45
44885	2	13.89	7.68	0.821	68.7	2	65	3	3	2	30.19	1413	0.022	15035.5	1	59
50004	1	3.25	3.37	0.353	68.7	1	80	4	3	2	23.47	1073	0.088	2783.75	1	68
50608	2	39.25	17.67	1.918	68.7	2	56	3	2	2	26	2012	0.011	13640.2	1	63
15804	2	12.2	6.62	0.626	68.8	2	74	3	3	2	28.53	2061	0.011	11838.3	1	22
17527	2	8.18	7.66	1.458	68.8	2	57	5	2	2	24.95	1319	0.035	8989.99	2	26
22598	1	6.33	5.65	0.577	68.8	2	76	3	2	2	27.8	1282	0.034	7672.15	2	31
23024	2	14.71	6.02	0.647	68.8	1	85	3	1	2	21.05	1234	0.032	5119.4	2	36
23967	2	12.73	6.37	0.991	68.8	2	65	1	4	2	24.15	1867	0.011	467.059	1	39
31026	2	11.73	11.35	0.547	68.8	2	70	1	4	2	30.72	1495	0.072	794.518	1	34
43020	1	14.16	9.27	1.112	68.8	2	80	3	2	2	34.33	1456	0.011	4519.94	1	70
44302	2	7.32	4.8	0.889	68.8	2	72	1	1	2	18.04	1055		2065.28	1	66
12276	2	6.05	5.87	0.56	68.9	2	69	4	3	2	26.17	1261	0.091	5448.6	1	27
14049	2	9.78	4.15	0.983	68.9	2	65	1	2	2	34.64	1174	0.011	591.987	2	15
18963	2	15.84	10.04	1.311	68.9	2	58	3	4	2	26.05	2647	143	14257.2	1	26
27838	2	25.07	21.78	0.91	68.9	1	79	3	2	2	30	1870	0.016	7912.98	1	32
44217	2	22.54	16.85	0.887	68.9	2	53	4	4	1	24.11	2013	0.052	4226.09	1	63
47421	2	16.88	8.85	0.817	68.9	1	65	5	3	2	25.14	1715	299	23368.9	2	71
50121	2	7.03	6.65	0.779	68.9	1	67	4	2	2	40.86	1323	2.53	1972.84	2	66
50849	2	9.76	7.46	1.404	68.9	1	67	3	5	2	23.8	2280	0.025	14813.2	2	61
22271	1	17.05	10.88	0.996	69	2	74	3	3	1	22.79	1819	0.011	13471.5	1	31
34675	1	13.35	5.62	1.27	69	2	78	4	3	1	28.4	1464	0.073	2660.02	1	48
38432	2	33.68	24.49	0.813	69	2	69	4	3	2	27.65	1215	0.011	2004.28	2	54
42260	2	7.39	5.66	1.106	69	1	59	3	1	2	31.96	1007	0.037	13417.5	2	60
51494	2	6.06	3.87	0.707	69	1	75	3	3	2	29.75	1189	0.019	10170.5	2	61
20166	2	5.52	8.99	0.395	69.1	1	69	3	1	2	28.8	1560	429	8174.98	2	21
27108	1	16.56	10.54	1.003	69.1	2	66	3	4	2	24.86	3410	0.027	26623.6	2	35
32239	2	6.84	4.94	0.633	69.1	2	60	3	3	2	21.11	914	187	15440.6	2	53
34266	2	7.94	5	0.654	69.1	1	76	4	1	1		967	0.152	1510.03	1	48
44807	2	9.54	11.28	0.913	69.1	2	56	4	3	2	32.9	2007	316	3136.16	2	64
46021	2	11.17	11.15	1.55	69.1	1	62	1	5	1	37.51	1737	0.042	1924.08	1	66
47310	2	10.73	7.69	1.54	69.1	2	67	3	4	1	20.63	1742	0.017	10695.9	2	68
48021	2	11.52	5.41	0.811	69.1	2	58	4	4	2	41.16	2016	232	2748.84	1	74
49912	1	15.3	13.68	0.918	69.1	1	75	3	3	2	33.47	953	0.092	3005.51	1	64
50321	2	9.6	12.79	1.372	69.1	2	59	3	4	2	26.77	1358	0.062	46220.8	2	59
24680	2	11.78	5.82	1.611	69.2	2	74	1	1	2	33.91	2307	0.263	808.043	1	34
32821	2	7.86	4.84	0.995	69.2	2	60	3	5	1	39.36	1026	0.033	13139.4	2	49
35151	2	9.93	10.03	0.932	69.2	2	81	3	3	2	27.34	1579	0.049	7832.02	1	44
38042	2	12.78	5.94	1.119	69.2	2	63	4	5	2	25.36	1170	0.271	4804.02	1	48
44959	2	7.95	4.09	0.414	69.2	1	62	3	1	2	18.97	1428	191	4098.79	2	59
49087	2	10.13	6.25	0.859	69.2	1	63	3	5	1	38.95	830	0.011	5192.32	1	65
18325	2	9.54	6.07	0.936	69.3	2	82	3	4	2	19.28	1113	139	4223.79	1	19
50374	2	14.52	11.29	1.327	69.3	2	69	4	4	1	20.39	1963	264	2245.29	1	62
13831	1	8.82	8.55	0.725	69.4	1	81	3	3	2	24.06	1048	0.91	6794.3	2	20
16971	2	10.23	6.89	1.128	69.4	1	63	4	5	2	25.53	1643	0.315	2932.64	1	24
23427	1	7.54	12.8	0.672	69.4	2	66	4	2	2	21.23	875		3454.12	2	33
25830	1	9.05	11.31	1.127	69.4	2	84	3	2	2	21.58	1478	0.011	4880.46	2	39
26294	2	13.9	9.61	0.983	69.4	1	82	3	3	2	28.25	1749	0.022	4851.49	2	35
50910	2	8.32	3.55	0.842	69.4	2	60	3	3	2	25.08	1043	0.041	22525	1	67
10529	2	14.6	6.25	1.164	69.5	2	61	1	1	2	29.73	1309	0.011	2142.07	1	15
13404	2	8.33	5.67	0.69	69.5	1	64	1	1	2	29.11	1389	0.026	654.528	2	25
15785	2	6.32	3.61	0.53	69.5	2	60	3	3	1	45.37	731	29.9	18426.6	1	19
19563	1	10.34	6.34	0.73	69.5	2	79	3	4	2	31.56	1484	0.011	9182.44	2	19
25773	1	10.76	5.39	1.006	69.5	2	65	3	3	1	30.8	1772	0.047	7221.31	2	34
26404	2	18.44	9.01	1.936	69.5	1	56	4	4	1	20.98	2688	364	16223.4	2	34
26418	1	6.74	5.77	0.662	69.5	2	82	3	2	1	19.84	1233	0.26	5824.22	2	37
27253	2	10.49	6.23	0.862	69.5	2	61	4	1	1	22.13	1031	450	1810	2	35
29032	1	7.57	6.11	0.756	69.5	2	82	4	1	2	23.11	1071	0.348	3821.15	1	41
34148	2	12.84	7.33	0.908	69.5	2	69	3	3	1	39.17	1407	0.011	32129.2	2	47
38306	2	23.61	12.77	1.033	69.5	2	60	4	3	1	44.74	1822	0.217	1910.82	1	45
40683	2	8.24	2.23	0.308	69.5	2	57	3	4	1	35.77	1063	67.5	8784.6	2	49
43330	1	9.07	12.42	0.382	69.5	2	72	3	1	1	39.45	1365	0.029	6537.32	2	59
44821	1	17	12.09	1.155	69.5	1	67	3	3	2	20.73	1500	244	3262.67	1	60
48276	2	13.45	11.32	30.424	69.5	1	64	4	3	2	27.93	901	0.071	1205.86	1	59
15376	2	9.58	6.33	1.284	69.6	2	81	3	5	2	23.3	1304	0.011	7132.93	1	14
16916	2	19.25	14.44	1.705	69.6	1	66	1	4	2	28.8	2092	0.011	1591.72	1	15
19320	2	8.61	6.31	0.768	69.6	2	75	1	4	2	27.27	1146	0.082	762.49	2	17
24271	2	16.08	8.55	1.139	69.6	2	63	1	1	2	25.13	1837	0.049	608.674	1	34
29862	2	10.09	7.28	0.796	69.6	2	77	3	5	2	28.18	1003	0.208	11176.6	1	31
29922	2	23.95	20.45	1.102	69.6	2	69	1	4	2	37.64	1209	0.011	2096.01	1	34
32439	2	9.38	5.62	0.819	69.6	2	85	1	1	2	22.08	1088	0.011	3752.89	1	58
34090	2	10.65	10.18	0.772	69.6	1	65	3	2	2	34.92	2099	76.2	6650.54	1	53
35146	1	10.65	8.43	1.461	69.6	2	85	3	4	2	29.89	1510	0.064	4771.55	1	55
37407	2	13.12	8.02	1.597	69.6	1	55	3	5	2	29.67	2005	213	7536.2	2	55
47942	2	8.95	7.08	0.83	69.6	2	80	3	1	2	17.02	1605	0.011	7998.13	2	59
51144	2	6.54	6.96	0.488	69.6	1	62	4	2	2	31.7	1384	91.5	3307.24	2	61
47626	2	7.4	8	1.033	69.7	2	67	3	5	2	22.93	975	0.021	23788.9	2	63
51407	1	22.4	16.55	1.494	69.7	2	80	3	4	2	29.29	1969	0.011	8629.91	2	72
51512	1	12.92	8.15	1.307	69.7	2	80	3	3	2	22.65	1941	0.026	11664.2	1	63
22921	1	13.16	8.13	1.739	69.8	1	80	1	1	1	24.62	1500	0.015	756.803	2	42
29254	2	10.01	7.66	0.936	69.8	2	85	3	2	2	32.4	1283	0.13	4122.03	2	33
33005	2	23.95	9.11	1.036	69.8	2	58	3	5	2	33.59	2029	0.204	21634.3	2	47
39524	1	26.98	14.8	2.872	69.8	1	68	1	1	1	33.11	2108		598.655	2	57
12684	1	29.79	11.04	1.258	69.9	2	85	3	3	2		1641	0.011	6451.71	1	23
19180	2	5.99	5.48	0.386	69.9	1	67	3	5	2	31.47	1150	0.011	18795.2	1	16
25832	2	25.28	18.96	0.924	69.9	1	83	3	3	2	21.44	1942	0.037	3617.26	2	35
30358	2	10.16	6.92	0.723	69.9	2	75	1	2	2	24.74	1575	0.011	1122.18	1	40
39048	2	12.92	5.66	0.793	69.9	1	64	1	3	2	24.52	1514	0.018	328.2	1	58
45215	2	11.92	9.84	1.071	69.9	1	71	3	4	2	24.81	2194	432	9805	1	59
51510	2	7.52	6.39	1.239	69.9	2	65	2	5	2	25.81	1258	0.039	1588.86	1	60
13306	2	8.75	7.25	0.66	70	2	62	1	1	2	27.69	1426	0.011	3924.28	1	15
19618	1	30.84	28.39	0.951	70	2	78	3	3	2	19.05	1228	0.011	9706.28	2	21
21298	1	16.38	13.38	1.488	70	2	65	3	5	2	31.01	2181	0.017	18580.8	2	37
27281	2	9.43	7.47	0.864	70	1	60	1	1	2	25.83	1473	100	1482.54	1	34
29060	2	8.45	5.39	0.803	70	2	57	2	5	2	23.9	1350	0.137	15929.9	1	36
29192	2	8.04	5.88	1.155	70	2	80	3	5	2	17.85	1290	0.028	4489.03	2	35
37225	2	16.98	12.8	1.007	70	2	82	3	4	2	33.09	1363	0.011	10768.9	2	46
46996	1	9.6	8.48	0.844	70	2	77	3	4	1	30.87	1614	0.025	6023.98	2	62
14811	2	10.82	7.33	1.296	70.1	2	60	3	4	2	33.27	1937		21535	1	17
32254	2	10.47	6.31	0.88	70.1	1	65	3	5	2	26.19	1451	0.011	13411.3	1	54
43705	1	6.7	5.87	0.645	70.1	1	80	4	2	1	31.27	1008	0.02	2653.5	2	68
50546	2	24.53	8.05	1.478	70.1	1	64	2	5	2	28.05	1817	154	1590.82	2	65
20623	1	19.06	10.63	0.624	70.2	1	85	3	5	2	27.2	1923	0.138	3197.48	2	23
26438	1	11.44	7.22	1.633	70.2	2	85	3	1	2	23.37	2011	0.056	5895.49	2	37
29842	2	12.61	8.98	1.7	70.2	1	60	1	2	2	24.43	1875	0.034	706.058	1	42
32453	1	10.8	4.66	0.691	70.2	2	68	4	3	1	35.79	1004		6525.83	2	45
33915	1	14.1	6.16	0.318	70.2	1	85	3	4	1	30.42	1029	0.011	6539.74	2	49
36451	2	9.42	7.55	9.709	70.2	2	65	4	2	2	31.75	1346	0.045	4856.29	1	48
36506	2	13.83	7.67	0.937	70.2	1	62	1	4	2	26.02	2271	1.11	9288.36	1	48
40838	2	9.76	8.09	1.482	70.2	2	73	3	1	1	24.74	1643	0.011	8618.88	1	48
45137	2	19.24	5.64	0.903	70.2	2	51	4	2	2	33.72	1405	0.04	2917.71	2	73
47485	2	7.63	4.77	0.806	70.2	2	61	3	5	2	37.84	1266	0.021	14559.4	1	60
50888	2	9.7	7.8	0.793	70.2	2	72	4	2	1	39.93	1650	511	6791.99	2	67
10625	2	6.23	6.57	0.475	70.3	2	73	1	1	2	22.59	955	0.011	701.991	2	25
20001	1	34.83	18.68	1.247	70.3	2	70	3	3	2		1342	0.011	16702.4	2	19
24785	1	13.33	5.98	0.704	70.3	1	78	3	3	2	28.12	1188	249	6753.96	2	30
25492	2	13.92	9.98	1.237	70.3	1	76	3	5	2	28.77	1849	0.011	15393.4	2	37
26129	2	11.6	12.71	0.968	70.3	2	60	3	3	2	24.47	1614	623	12418	2	36
28027	2	8.38	33.51	1.874	70.3	2	63	2	3	2	33.83	1341	0.054	8548.86	2	36
42820	2	10.26	8.68	0.947	70.3	1	68	3	2	2	19.88	1987	0.011	13742.5	2	71
47650	2	4.9	4.93	0.553	70.3	2	63	3	5	2	31.29	1329	0.029	14056.5	2	69
50998	2	5.17	5.57	0.529	70.3	2	58	4	5	2	28.48	797	0.011	4831.23	1	59
10273	2	14.55	8.8	1.215	70.4	1	72	3	5	2	29.15	2680	0.033	4287.88	1	22
10396	2	8.4	9.61	0.873	70.4	2	60	3	3	2	42.35	2468	0.053	11104.1	2	22
12277	2	6.39	5.76	0.42	70.4	2	85	4	1	2	27.01	1076	406	2129.66	1	25
32061	2	11.71	4.78	0.74	70.4	2	79	3	3	2	29.23	1129	0.212	15554.7	1	55
36085	2	6.46	4.87	1.117	70.4	2	62	4	2	1	32.88	1226	0.044	7565.97	2	56
39080	2	11	7.1	1.647	70.4	2	70	3	5	2	35.78	1297	0.022	8379.63	2	48
43018	2	8.85	7.43	0.904	70.4	2	68	1	1	2	35	1563	0.043	1221.85	2	67
44971	1	9.73	9.12	1.296	70.4	2	74	4	1	2	28.67	1649	0.03	2751.51	2	62
46006	1	10.69	6.99	1.036	70.4	2	74	3	5	2	22.33	1220	0.021	8482.81	2	64
46899	2	22.01	12.61	1.497	70.4	1	56	1	5	2	30.24	2090	78.2	1582.13	1	65
50194	1	10.34	5.97	0.911	70.4	2	61	1	1	1	26.16	1474	0.011	1997.24	1	66
51365	2	11.45	11.32	1.299	70.4	2	66	3	5	2	38.36	2569	0.062	14784.1	2	59
10700	2	7.93	10.93	0.544	70.5	2	61	1	4	2	32.91	1070	0.057	828.318	2	27
14100	2	10.33	10.93	0.754	70.5	2	66	4	5	2	28.92	1268		4365.9	1	15
16239	2	16.13	11.08	1.699	70.5	2	60	3	5	2	26.05	3485	0.017	7956.05	2	21
18616	2	8.63	5.07	0.746	70.5	1	60	4	4	1	28.68	1879	0.026	12508	2	16
18852	2	10.25	7.65	0.877	70.5	2	83	3	3	2	23.37	1168	0.018	7554.37	2	14
21500	2	12.15	12.1	1.328	70.5	2	66	3	5	2	24.94	2462	0.027	18852.7	1	37
21619	2	13.58	9.17	0.974	70.5	2	81	3	3	2	19.98	1671	0.011	5387.28	1	29
21715	1	15.9	6.73	0.823	70.5	1	85	3	1	2	35.83	1665	0.021	4659.66	2	36
28729	1	16.46	7.23	1	70.5	2	74	3	5	2	20.64	1435	0.011	15033.4	2	29
33543	2	14.12	16.11	0.891	70.5	1	76	3	3	2	20.83	1444	0.037	19222.1	2	47
40172	2	13.09	9.74	1.474	70.5	1	68	1	1	2	23.14	2500	82.4	6213.81	1	56
46111	2	14.4	6.47	0.968	70.5	1	64	4	5	1	31.71	1678	332	1575.72	2	67
24721	2	12.63	16.35	1.246	70.6	2	58	3	3	2	26.75	2315	0.011	28199.6	1	37
38032	2	17.94	5.74	0.751	70.6	1	64	4	2	2	49.24	1703	324	2391.79	1	50
38969	2	9.13	11.94	1.047	70.6	2	77	3	1	2	26	1679	240	13658.3	2	47
44521	1	9.22	7.22	13.811	70.6	2	80	3	2	1	27.91	775	0.434	8877.65	1	61
11356	1	6.71	4.93	0.657	70.7	2	85	3	5	2	23.3	1142	0.011	5182.3	1	17
18614	2	4.05	3.23	0.616	70.7	1	52	4	2	2	24.62	2403	380	6573.03	2	22
25680	2	18.94	9.45	0.751	70.7	2	78	3	4	2	25.29	1332	1.77	10041.6	1	41
40548	2	47.52	39.4	1.576	70.7	2	64	3	5	1	32.85	2200	0.011	18881.7	2	44
41555	2	10.8	9.24	1.454	70.7	2	78	4	1	2	37.82	1429	1	6991.4	1	71
42369	1	10.64	5.77	1.051	70.7	2	80	4	1	2	24.85	1759	339	2901.95	1	59
45688	1	7.89	5.52	0.914	70.7	2	80	3	5	2	22.29	1350	0.011	6066.57	1	70
50100	1	15.12	13	1.639	70.7	2	80	3	3	2	20.58	1376	0.011	10256.1	2	60
15264	2	9.1	6.36	0.711	70.8	2	62	5	5	2	20.53	1442	0.052	17204	1	18
29243	1	17.24	8.77	0.675	70.8	2	69	4	2	2	34.1	1548	0.011	4953.85	2	31
30108	2	30.38	23.37	0.789	70.8	1	66	3	4	1	20.07	1336	0.085	7789.2	2	35
33520	2	8.79	5.9	0.854	70.8	1	74	3	5	2	25.41	1061	0.053	8401.59	2	49
41320	2	11.04	8.71	1.06	70.8	2	65	3	5	2	28.28	1446	0.132	12584.1	2	49
45733	2	8.76	6.43	1.461	70.8	2	59	4	4	2	46.28	1759	178	2875.3	2	74
46874	2	9.47	4.25	0.847	70.8	2	80	3	3	2	32.25	1042	0.024	9731.9	1	63
16187	1	9.99	6.55	0.335	70.9	1	70	3	1	1	26.93	660	0.075	9235.82	1	23
17599	2	15.71	11.51	1.176	70.9	1	82	3	2	2	27.85	2010	0.032	5702.39	2	18
17632	2	12.9	8.36	0.834	70.9	2	65	3	5	2	24.82	1462	79.6	6675.93	2	14
19688	2	13.22	11.02	1.479	70.9	1	73	3	4	2	22.79	1929	395	4633.79	2	23
33727	2	7.73	7.01	1.201	70.9	2	57	4	4	2	30.56	1362	0.781	13094.6	1	50
36207	1	10.63	12.37	1.439	70.9	1	85	3	1	2	30.59	1603	0.109	7022.27	1	48
36351	2	9.54	6.6	0.721	70.9	1	64	4	4	2	24.36	1288	449	2929.57	2	45
39248	2	10.93	10.05	0.688	70.9	1	60	3	4	2	25.2	936	0.023	9667.06	2	56
48927	2	13.2	8.34	1.476	70.9	1	67	1	1	2	23.33	2162	258	3753.08	2	65
50479	2	11.75	13.54	1.002	70.9	2	56	1	5	2	48.04	1481	0.011	2601.21	2	65
40515	2	15.42	5.89	1.255	71	1	73	3	3	2	22.33	1753	171	6650.87	2	57
41454	2	20.63	13.91	1.002	71	1	66	3	4	1	33.54	2059	0.362	6153.16	2	54
49413	2	11.12	4.98	0.742	71	2	69	1	1	2	27.68	1587	0.213	981.674	2	69
10802	2	11.35	6.52	0.749	71.1	1	72	3	5	2	24.48	1271	0.064	5026.77	1	21
20502	2	10	6.6	0.811	71.1	2	76	3	3	2		1333	0.205	5419.8	1	23
23324	2	7.05	4.25	0.758	71.1	1	68	3	3	2	29.03	1864	0.011	19857.8	1	29
27265	2	16.64	6.69	1.016	71.1	1	60	4	4	2	29.04	1932	31.6	5236.86	1	36
41983	2	5.44	5.16	0.447	71.1	2	71	3	3	2	23.48	893	0.011	4993.2	1	59
10670	2	10.12	10.34	0.987	71.2	2	79	4	5	2	25.15	1659	0.011	2204.78	2	18
12172	1	9.23	7.87	1.568	71.2	1	59	3	5	2	35.18	1567	14.7	24412.5	1	23
14993	2	10.29	7.55	1.008	71.2	1	56	3	3	2	28.41	2088	0.016	27286.7	2	23
17325	2	9.82	12.27	1.632	71.2	1	55	4	4	2	32.99	2434	0.015	5742.38	1	16
20807	2	16.91	7.15	1.094	71.2	2	66	4	5	2	42.03	2212	0.021	3210.08	1	21
26365	2	8.38	10.16	0.971	71.2	1	61	3	4	2	28.1	3345	0.022	24090.1	1	31
36298	2	15.54	14.25	1.373	71.2	1	72	3	5	2	30.34	2344	0.053	10121	2	52
38073	2	12.76	6.21	1.072	71.2	2	75	3	4	2	22.03	1589	0.011	10649.4	2	49
44313	2	8.11	4.01	0.752	71.2	1	62	5	3	2	23.5	1294	0.022	27920.9	2	65
44455	2	10.41	9.16	1.004	71.2	2	64	3	3	2	31.42	1153	0.112	19777.6	2	61
23791	2	11.1	6.26	0.941	71.3	2	72	3	3	2	28.01	1622	0.022	21515.3	1	32
45507	2	5.73	7.7	0.772	71.3	1	70	3	1	2	28.35	824	600	2424.33	2	59
46945	2	8.3	5.41	0.658	71.3	2	80	4	2	1	31.08	1085		2563.25	1	62
48522	2	10.6	7.98	1.188	71.3	2	64	3	4	2	19.86	2072	0.019	14600.3	2	63
16570	2	13.79	9.11	1.034	71.4	2	67	3	4	2	22.09	2381	0.011	6529.42	1	22
30040	2	6.54	4.86	0.566	71.4	2	65	5	3	2	38.93	1150	0.097	3314.24	1	32
31447	1	41.21	34.69	1.593	71.4	1	85	3	3	2	26.48	2020	0.011	2049.14	2	44
37130	2	20	7.99	1.013	71.4	1	82	3	2	2	28.75	1641	0.02	3848.53	2	50
42330	2	22.64	9.23	1.37	71.4	2	80	3	2	2	25.07	1879	0.02	6201.19	1	62
46497	2	8.24	6.16	0.863	71.4	1	64	4	2	1	29.87	1731	0.312	1604.76	2	67
47790	2	10.73	8.85	0.981	71.4	1	62	3	5	2	28.59	1237	0.02	12251.8	1	60
48151	2	25.34	16.12	1.451	71.4	1	55	3	4	2	21.29	3267	542	15765.7	2	66
13660	2	11.01	9.06	1.321	71.5	2	81	3	4	2	26.31	1336	0.011	3356.33	1	22
15001	2	6.13	4.04	0.476	71.5	1	82	3	1	2	31.45	1019	0.035	3177.54	2	18
36931	1	9.21	5.65	0.673	71.5	1	81	3	4	2	30.12	1047	5.58	4884.45	2	44
42239	2	13.52	12.69	1.284	71.5	1	58	3	5	2	31.55	1649	0.03	18075.8	2	61
46003	1	3.29	2.25	0.341	71.5	2	68	4	3	2	38	669		4925.89	1	61
18555	2	12.91	7.63	1.101	71.6	1	83	3	5	2	29.9	1777	0.017	3997.04	2	24
21253	2	17.87	14.31	0.968	71.6	1	85	3	3	2		1641	0.392	3121.69	2	36
22359	1	14.19	20.32	1.132	71.6	1	84	4	5	2	25.31	1181	0.238	4996.71	1	41
36275	2	9.59	8.54	1.658	71.6	1	84	3	2	2	19.61	1442	0.149	4137.54	2	47
50050	2	10.3	12.56	1.002	71.6	1	63	3	3	1	24.86	881	0.072	19678.9	1	59
10311	2	8.63	7.63	1.123	71.7	1	76	3	4	2	25.52	1942	0.011	14536.9	2	19
23958	1	6.88	7.67	0.547	71.7	2	61	4	3	1	38.23	1263	0.09	9029.49	1	42
25102	1	16.35	5.68	0.885	71.7	2	84	2	3	1	23.54	1422	0.027	4371.45	1	35
27961	1	10.71	5.74	0.982	71.7	2	81	3	2	2	26.85	1260	0.046	4195.05	1	29
28792	2	14.36	12.28	1.457	71.7	1	61	1	3	2	35.14	2273	12.1	610.115	1	34
34627	2	12.17	5.65	0.83	71.7	1	56	3	3	2	28.91	2040	116	12437.9	2	44
44838	2	5.34	8.76	0.842	71.7	2	71	3	3	2	22.97	1438	256	3697.64	1	61
46196	2	27.66	25.04	1.647	71.7	1	79	3	4	2	25.95	1696	0.024	5646.46	2	63
47471	1	9.63	9	1.387	71.7	2	80	3	1	2	26.31	1636	0.035	8850.03	2	62
12329	2	24.09	12.13	1.535	71.8	2	58	1	1	1	32.51	1349	0.06	3117.28	2	28
18116	2	23.18	6.32	0.536	71.8	2	71	1	1	1	28.29	1170	230	2207.52	2	23
18709	2	8.66	5.94	0.73	71.8	1	62	4	1	1	35.85	1062	0.191	1483.59	1	16
21582	2	29.28	12.17	1.174	71.8	2	77	3	3	2	21.32	1618	0.018	17538.9	1	32
34713	2	14.94	15.52	1.061	71.8	1	72	3	5	2	25.58	1404	0.011	12792.8	1	55
35416	2	7.09	9.44	0.758	71.8	1	63	3	5	2	24.06	1835	0.019	21927.6	1	44
49633	2	7.75	6.05	0.533	71.8	2	65	3	3	2	24.61	1452	0.02	12573.6	1	61
50577	1	9.13	6.06	1.014	71.8	2	65	3	5	2	28.79	1690	0.011	13305.7	1	67
21992	2	6.99	5.25	0.523	71.9	1	64	3	1	2	34.53	1252	0.102	7728.12	1	43
29995	2	14	9.11	0.673	71.9	2	59	1	3	2	22.75	1789	0.552	2740.87	2	42
30571	2	7.17	4.5	0.459	71.9	1	52	4	3	2	26.21	1316	880	12639.9	2	34
31800	2	25.18	6.02	0.882	71.9	2	60	3	3	2	23.35	1279	0.011	9800.61	2	52
34715	1	9.55	5.85	1.15	71.9	2	76	3	3	1	30.88	1795	0.079	28365.8	1	45
44155	2	24.18	14.38	2.144	71.9	2	71	4	3	2	32.59	1898	0.011	5365.36	2	67
29382	2	11.94	7.93	1.513	72	1	74	3	1	2	28.61	2161	0.154	3482.21	2	31
50023	2	9.59	7.48	1.783	72	2	62	3	5	2	26.92	1720	0.017	19481.9	1	63
10975	2	12.98	16.21	1.587	72.1	2	63	4	4	2	27.59	1785	0.079	4996.47	2	17
12655	2	23.92	13.16	0.684	72.1	2	70	4	3	2	25.57	1102	0.011	1418.93	1	27
33660	2	10.52	5.36	1.24	72.1	2	59	3	5	2	21.33	1312	0.015	14023.4	2	56
41753	2	9.71	7.68	0.953	72.1	1	78	3	4	2	37.68	1828	0.059	14919.2	2	60
17615	2	12.88	9.74	1.189	72.2	1	75	3	5	2	29.29	2083	0.094	7709.41	2	26
27171	2	12.69	6.59	0.689	72.2	2	65	3	3	2	28.19	1511	0.011	28512.1	2	36
35619	2	8.84	10.34	0.71	72.2	1	72	3	2	2	28.53	1308	0.019	5659.75	2	46
50935	2	10.74	8.56	1.084	72.2	1	55	3	4	2	27.59	2011	0.06	21826.9	2	67
12751	2	8.41	6.86	0.734	72.3	2	67	4	3	2	26.22	1121		9230.44	2	15
17683	1	8.11	7.54	1.732	72.3	1	85	3	5	2	34.22	1817	0.033	1401.41	2	20
30167	2	9.3	3.93	0.79	72.3	1	69	3	5	2	25.76	1271	0.059	14299.9	1	33
40520	2	13.71	8.52	0.901	72.3	2	85	3	1	2	20	1258	0.076	17428.1	2	55
41415	1	24.97	15.12	1.063	72.3	1	85	3	4	2	25.45	1887	0.045	3521.01	2	49
42736	2	12.53	6.14	1.135	72.3	1	61	1	1	2	28.19	1568	0.019	1693.88	1	66
46555	1	24.64	6.54	0.736	72.3	1	80	3	4	2	26.37	2170	13.5	5508.53	1	59
14238	2	13.68	12.31	0.984	72.4	1	79	3	4	2	26.92	1306	0.011	7419.61	1	17
19056	2	8.65	3.13	0.632	72.4	1	63	4	2	2	22.79	1022	0.035	2064.47	1	25
25197	1	8.57	8.6	0.847	72.4	2	85	3	3	2	19.94	1351	0.011	5670.93	2	32
28884	2	7.37	4.83	0.572	72.4	2	65	4	4	2	23.23	1475	1.27	2974.77	2	41
41321	2	12.98	8.78	1.018	72.4	2	73	4	2	2	37.11	1391	0.08	6536.43	1	50
46825	2	9.15	5.81	0.935	72.4	2	55	4	3	2	28.19	2376	148	3015.63	1	64
14503	1	9.66	5.63	1.097	72.5	2	63	4	5	2	24.43	1812	0.061	5835.09	1	27
25765	1	11.24	14.15	0.908	72.5	2	71	3	2	1	37.94	1066	0.011	9622.98	2	32
28458	2	10.49	6.15	1.215	72.5	1	76	3	1	1	24.06	1239	0.024	3482.71	2	34
40643	2	11.06	7.49	1.632	72.5	1	67	1	3	1	22.7	1467	235	2982.17	1	58
44579	2	9.04	5.62	1.463	72.5	1	59	4	3	2	26.09	2156	260	5462.2	2	70
45558	1	15.33	6.78	1.067	72.5	2	73	2	1	1	37.49	1833	0.036	2659.64	2	62
46228	1	9.09	4.65	0.654	72.5	2	70	3	4	1	27.76	1544	503	10711.9	2	64
46564	2	5.8	5.94	0.854	72.5	2	65	1	1	2	23.91	1192	75.6	1274.92	1	71
48016	2	10.33	7.9	1.403	72.5	2	75	2	3	2	29.09	1414	0.011	3120.06	1	70
16445	1	17.32	4.52	0.971	72.6	2	72	2	1	2	17.52	1256	104	15952.5	2	27
26313	2	9.81	8.02	0.972	72.6	2	67	4	4	2	36.83	1413	0.363	6254.22	2	43
29195	2	13.8	14.36	1.102	72.6	1	72	3	3	2	22.61	3138	0.217	12686.4	2	37
40523	1	24.12	14.5	1.134	72.6	1	67	1	1	1	22.04	2645	0.011	1138.43	2	57
45706	2	8.82	7.13	0.832	72.6	1	65	4	5	1	33.25	1643	0.344	2159.71	2	71
46481	1	16.74	7.2	1.27	72.6	1	75	3	5	2	26.64	1657	0.011	8433.76	2	68
47746	2	12.86	7.2	0.794	72.6	2	58	5	5	2	26.15	2107	0.081	52922.2	2	60
12313	2	9.46	7.01	0.849	72.7	1	60	4	5	2	47.61	1456	0.055	1114.92	1	17
20316	1	9.93	2.89	0.833	72.7	2	65	2	4	2	38.17	1114	0.316	8941.55	1	18
21574	2	12.97	6.57	1.105	72.7	2	83	3	1	2	25.64	1342	0.217	5439.94	2	39
22312	1	17.18	9.37	0.649	72.7	1	76	3	1	2	25.68	942	0.034	3627.98	1	32
28693	2	13.04	7.99	1.296	72.7	1	72	3	4	2	24.55	2460	0.034	3995.73	2	34
30466	2	13.11	6.11	1.102	72.7	1	77	3	1	1	21.1	1298	204	16251	2	31
39065	2	10.27	5.71	1.519	72.7	2	55	3	4	1	44.77	1611	0.028	31809	1	44
39116	2	13.9	9.39	1.07	72.7	1	60	4	5	1	32.15	1685	0.043	871.753	2	45
42603	1	22.56	15.82	2.597	72.7	1	80	3	4	1	34.74	1896	0.089	4719.23	1	63
44691	2	6.86	3.2	0.863	72.7	1	60	4	3	2	27.28	2177	323	1048.64	2	60
10367	2	24.54	22.68	0.968	72.8	2	84	3		2	22.27	1093	0.035	5158.46	2	26
16088	2	16.42	7.3	0.957	72.8	2	55	3	5	2	21.56	1235	0.011	11935.9	1	19
21455	2	7.95	5.4	0.595	72.8	1	84	3	1	2	26.14	1353	107	7764.46	2	30
26812	2	19.05	14.07	1.728	72.8	1	71	3	3	2	20.83	2137	333	15301.4	2	35
24748	1	11.25	8.07	1.011	72.9	2	80	3	3	2	26.16	1456	0.011	8232.64	2	30
29216	2	10.74	5.42	0.866	72.9	1	56	1	1	1	32.15	1530	0.011	3996.81	1	40
29455	2	20.34	11.72	0.648	72.9	2	62	1	2	2	33.51	929	0.011	1001.26	2	38
38100	2	12.28	10.45	1.373	72.9	2	65	2	4	1	34.5	1307	382	2053.51	1	44
39876	2	8.79	6.71	1.135	72.9	2	80	3	2	2	27.67	1344	0.015	7894.91	1	44
41005	2	23.2	10.35	0.908	72.9	1	65	4	1	2	23.32	1425	63.5	1011.3	1	51
41858	2	7.87	7.25	0.824	72.9	1	60	3	4	2	20.83	1321	43.9	14386.3	2	60
44698	2	8.33	4.55	0.867	72.9	1	74	3	2	2	24.34	1910	0.092	6479.35	1	59
46496	2	13.28	1.87	0.572	72.9	2	63	4	4	1	42.03	476	0.044	3067.95	1	61
49758	2	8.38	4.97	0.677	72.9	2	69	3	3	2	29.68	1280	0.034	5979.4	2	59
51153	2	5.4	6.55	0.664	72.9	1	50	4	2	2	27.05	643	211	11152	2	68
18386	2	9.92	9.77	1.792	73	1	62	1	5	2	21.41	2098	0.011	2403.22	1	15
22530	1	18.61	10.33	2.699	73	1	75	3	5	2	27.7	2111	0.052	15301.4	2	35
25507	1	12.5	11.7	1.252	73	2	85	3	1	2	25.33	1954	0.019	5921.36	2	32
32489	2	10.05	8.66	1.549	73	1	62	3	2	1	30.88	1652	0.076	20522.3	1	47
36519	1	10	5.15	1.511	73	2	67	3	5	2	26	1646	0.144	14749.8	2	54
37373	1	12.13	11.64	1.117	73	2	77	3	3	1	33.26	1924	0.011	11173.2	2	53
42005	2	10.58	5.37	0.751	73	1	80	3	4	2	29.44	868	323	6651.41	1	67
47382	2	8	7.31	3.637	73	2	69	4	3	2	41.02	965	0.021	2137.94	1	72
49106	2	19.16	7.79	1.272	73	2	65	3	4	1	36.65	1349	0.031	6327.73	2	60
19788	2	5.25	4.41	0.925	73.1	1	53	4	2	2	26.42	1298	114	2503.41	1	24
27669	2	17.03	11.26	0.877	73.1	1	85	3	1	2	23.74	1266	230	1921.7	2	31
33246	1	6.52	6.47	0.938	73.1	2	73	3	4	2	35.2	1175	0.011	6252.47	2	56
40399	2	13.33	13.41	0.779	73.1	1	85	3	5	2	23.96	1703	0.011	6198.74	2	50
42524	2	6.98	5.3	1.093	73.1	1	64	3	3	2	28.03	1590	0.021	11481.9	1	61
42627	2	6.42	5.42	0.567	73.1	1	80	1	1	1		891	0.022	2379.26	1	66
47455	2	23.7	12.28	1.507	73.1	1	73	3	2	1	40.7	1592	0.106	8725.76	2	70
11070	2	12.02	18.97	0.844	73.2	2	67	3	2	2	27.39	1340	0.194	11570.6	2	18
12657	2	19.05	12.31	1.627	73.2	2	56	3	5	2	34.63	2237	0.017	13089.9	2	19
18932	1	16.05	10.72	1.165	73.2	2	71	3	5	2	22.34	2288	0.055	8699.77	2	24
18958	2	12.59	6.67	0.444	73.2	1	82	3	4	2	26.95	1181	0.021	7478.8	2	14
20470	2	12.3	3.98	0.844	73.2	2	64	3	3	2	42.56	1799	0.03	5918.93	1	21
23327	1	14.04	5.23	0.767	73.2	2	83	3	2	1	34.23	1426	0.129	5393.79	2	34
26815	2	22.25	10.13	0.934	73.2	1	80	5	1	2	30.53	1346	0.016	3404.87	2	34
26954	2	10.9	6.36	0.886	73.2	1	72	4	2	1	26.94	1765	231	1582.53	2	41
30097	2	10.4	4.09	0.932	73.2	2	72	3	4	2	23.8	1360	0.011	14852.9	1	31
33213	2	10.16	5.83	0.883	73.2	2	50	4	4	2	23.64	2161	0.148	8970.06	2	51
36719	2	13.39	13.94	1.428	73.2	1	69	3	1	2		1871	7.07	5830.64	2	44
36729	1	6.78	4.74	0.928	73.2	2	85	3	4	2	29.89	1044	0.052	11575.4	2	46
36873	2	9.77	11.13	0.998	73.2	2	51	4	4	2	31.91	2237	580	4568.1	2	45
37412	1	8.29	6.06	0.938	73.2	2	85	3	2	2	23.09	1229	0.055	4920.16	2	49
40044	2	20.73	8.01	1.236	73.2	2	79	3	4	2	29.69	1562	0.017	14778.2	1	45
40573	1	10.96	7.68	1.329	73.2	2	83	3	1	1	30.67	1285	0.041	9934.06	2	49
42580	1	15.37	14.21	1.356	73.2	2	80	3	3	2	22.79	1576	0.02	8165.36	1	63
44627	2	23.89	12.35	1.231	73.2	1	60	3	5	2	29.94	1671	0.039	17550.7	2	63
15762	2	17.05	6.56	1.675	73.3	2	84	3	1	2		1837	0.091	6226.01	1	23
15770	1	8.43	5.8	0.829	73.3	2	82	1	2	2	36.88	1380	0.062	869.039	1	17
18676	2	8.2	6.93	1.135	73.3	1	75	3	5	2	30.53	1587	0.011	8682.5	1	15
21275	2	9.9	11.36	1.206	73.3	2	65	1	1	1	35.07	1164	0.042	2386.06	1	34
22859	2	8.61	5.07	0.635	73.3	1	80	3	3	2	31.26	1790	299	4875.39	2	32
31972	2	7.29	6.66	0.874	73.3	2	73	3	2	2	23.37	1657	292	10883.6	2	44
39475	1	9.75	8.56	1.004	73.3	2	75	3	3	2	19.91	1529	0.021	8129.55	2	49
42670	2	14.92	10.06	0.904	73.3	2	62	3	3	2	29.29	1901	140	18592.2	1	63
48471	2	6.02	5.45	0.672	73.3	2	67	3	2	2	28.27	1146	0.07	13468.1	1	64
11295	2	13.1	5.63	0.653	73.4	2	85	3	1	2		874	0.019	4056.96	1	23
14770	2	14.22	9.03	1.245	73.4	1	57	1	5	2	27.66	2138	0.018	1960.01	2	15
15890	2	12.76	8.48	1.403	73.4	1	72	3	4	2	23.31	2181	2.64	6935.06	2	20
21419	2	10.64	9.2	1.216	73.4	2	58	1	2	2	28.18	1851	0.011	3084.7	1	34
27234	2	12.36	11.71	0.485	73.4	2	69	4	2	1	48.73	1188	0.454	7559.4	1	30
34663	1	6.42	3.73	0.417	73.4	2	69	4	2	2	47.63	1557	1.01	4511.45	2	51
37047	1	10.61	9.92	0.793	73.4	1	84	3	4	2	27.5	1449	0.011	6937.91	1	53
40570	2	15.32	13.7	2.122	73.4	2	75	3	3	2	22.5	1558	0.011	8379.63	2	48
42459	1	10.47	6.31	1.483	73.4	2	57	3	5	2	27	1547	0.031	27844.8	2	61
44550	2	8.79	5.92	1.136	73.4	2	66	2	4	2	29.71	1258	0.011	1355.39	2	63
50335	2	10.32	5.29	1.323	73.4	2	70	3	5	2	41.89	1429	0.011	8229.94	2	66
10013	2	7.26	8.35	0.863	73.5	1	58	1	1	2	29.52	2551	10.4	1227.8	2	25
11430	2	11.67	6.17	0.611	73.5	1	77	3	3	2	23.94	1247	0.011	5819.08	1	19
15952	1	13.98	9.22	1.165	73.5	1	63	3	1	2	26.61	2471	343	10748.9	2	25
29932	1	15.49	12.38	1.008	73.5	2	76	1	1	2	33.1	1237	0.011	3231.25	2	38
35673	2	22.22	10.28	1.148	73.5	1	71	3	4	2	28.36	1836	0.011	6632.29	1	54
42845	1	6.29	6.3	0.934	73.5	2	80	3	3	1	37.35	1260	0.086	13521.6	2	61
47635	2	11.13	7.1	0.535	73.5	1	66	1	4	2	29.16	1165	0.02	3904.31	2	66
50051	1	9.7	4.25	0.976	73.5	2	70	3	3	2	47.47	1627	0.033	8189.17	1	67
10518	2	9.15	5.02	0.698	73.6	2	63	2	1	2	25.29	1103	58.7	6467.95	2	14
11551	2	7.84	7.1	0.724	73.6	2	64	3	4	2	39.03	1068		9718.1	1	19
13027	1	5.48	6.66	0.593	73.6	2	75	3	2	2	31.23	1090	233	4953.05	2	21
16061	2	8.58	6.69	0.709	73.6	2	56	3	3	2	18.86	1836	261	28290.1	2	23
17693	2	12.12	9.02	1.136	73.6	2	58	3	5	2	43.03	1526	0.022	23909.7	1	23
25052	2	9.31	5.2	0.883	73.6	2	58	4	2	2	38.71	1905	0.056	7309.23	1	43
28802	2	11.03	8.22	1.028	73.6	2	66	1	1	2	31.96	1321	0.045	327.552	2	43
38633	1	17.07	15.13	1.393	73.6	2	85	3	4	2	23.42	1255	0.016	4878.43	2	49
38886	2	4.2	2.52	0.305	73.6	2	77	3	3	2	25.74	788	0.011	20450.2	1	45
47115	2	7.76	9.62	0.471	73.6	2	63	3	5	2	22.71	1033	0.024	13438.4	2	70
12124	2	10.29	7.28	1.001	73.7	2	73	1	1	2	28.87	1334	0.011	627.102	2	28
30799	2	6.85	6.78	0.632	73.7	2	74	3	2	1	41.73	1496	0.011	10447.3	2	40
32440	2	7.83	6.13	0.795	73.7	1	72	3	2	2	36.45	1165	0.258	3887.81	2	47
36827	1	10.55	5.49	1.292	73.7	2	83	3	2	2	28.07	1212	0.011	5477.37	2	50
41953	2	22.18	17.08	0.838	73.7	2	80	3	4	2	32.25	1296		10271.2	2	65
47010	2	5.11	4.46	0.785	73.7	2	62	2	3	1	32.41	885	0.011	1735.99	2	62
10633	2	10.95	6.61	1.232	73.8	2	63	3	4	2	25.42	1785	0.016	7618.52	1	19
16062	2	7.2	4.69	0.657	73.8	2	74	1	1	2	29.51	1163	0.075	1219.28	2	27
18746	2	10	9.16	0.585	73.8	2	62	1	3	1	40.72	1041	0.011	3928.47	2	27
25088	2	7.76	5.15	0.586	73.8	1	79	4	2	2	32.74	1568	0.06	1810.29	1	39
26385	2	53.32	15.44	0.952	73.8	1	52	4	4	1	33.04	1543	68	6073.48	2	33
28398	2	19.95	8.9	1.04	73.8	1	69	4	5	1	28.06	2061	311	1470.56	1	42
38279	1	9.77	9.47	1.076	73.8	1	85	3	4	2	23.11	2025	0.174	17510	2	46
41040	2	12.64	7.43	0.681	73.8	2	85	3	2	2	27.56	1132	0.011	8989.93	2	47
41636	2	9.2	9.94	1.157	73.8	2	61	1	3	2	26.44	2093	0.011	1535.48	2	70
45387	2	20.31	18.62	0.831	73.8	2	80	3	5	2	22.68	2201	0.018	5226.93	2	63
46047	2	10.57	9.28	0.989	73.8	2	55	1	4	2	26.36	2381	0.035	2532.8	2	65
50113	2	11.52	10.06	0.897	73.8	1	80	3	3	2	21.48	1524	0.023	2637.22	1	61
50229	2	12.49	13.11	1.673	73.8	1	52	4	5	2	29.04	2069	0.352	10123.7	1	69
51009	2	13.96	11.03	1.254	73.8	1	63	4	3	2	30.98	1142	0.046	1517.45	1	61
10805	2	11.99	6.93	1.484	73.9	1	73	3	1	2	22.7	2202	183	4533.58	1	23
14761	2	5.94	2.86	0.534	73.9	2	73	4	2	2	40.55	1079		1707.42	2	26
29574	2	8.15	6.55	0.709	73.9	2	77	3	1	1	22.96	1023		9436.24	1	29
30986	2	6.01	6	0.422	73.9	2	74	4	2	1	30.5	1106	0.069	2256.92	1	30
34851	2	9.51	5.36	0.62	73.9	1	56	4	2	2	21.51	1379	129	15202.4	2	51
41194	2	8.04	4.01	0.682	73.9	2	66	3	2	2	32.47	1115	171	6876.83	2	44
42682	1	13.18	15.03	1.682	73.9	1	80	3	1	2	26.09	2901	0.02	6295.85	2	62
46575	2	14.07	14.95	1.764	73.9	2	62	3	3	2	27.28	2663	0.011	14025.1	2	62
13510	2	6.97	6.69	0.833	74	2	68	3	2	1	28.74	1207	0.011	8903.26	1	19
22457	1	16.5	9.87	0.935	74	2	78	4	1	2		1586	0.937	5754.96	1	41
26018	1	8.87	8.23	1.028	74	2	73	1	1	1	21.88	1504	0.015	1175.58	1	34
37456	2	7.62	6.18	0.343	74	2	52	4	3	2	30.48	1487	870	6633.65	1	52
40217	2	22.51	10.92	1.302	74	1	71	3	5	2	29.68	2544	0.572	11802.4	2	52
41610	2	8.06	5.89	1.388	74	2	67	2	3	2	26.31	1195		1258.27	1	69
43567	1	13.73	7.72	1.003	74	2	79	3	3	2	30.87	1218	0.032	5730.15	2	61
44296	2	35.95	28.43	1.595	74	2	73	3	3	1	33.43	1866	0.011	9888.58	2	63
12945	2	10.38	4.52	0.918	74.1	2	62	3	3	2	31.36	1660	0.035	21812	2	24
13942	2	38.85	38.84	1.288	74.1	1	85	3	3	1		2083	0.105	3562.5	1	23
18790	1	17.68	10.03	1.412	74.1	1	66	3	2	2	26.42	2236	0.024	21051.9	2	27
22803	2	12.57	8.7	1.859	74.1	2	62	4	4	2	23.77	2190	0.076	2974.77	2	41
33864	2	9.58	9.58	0.625	74.1	2	61	3	5	2	26.29	975	0.027	26318.4	2	44
35260	2	8.49	5.86	0.616	74.1	2	74	3	1	2	24.16	1072	0.126	8961.89	2	47
43085	2	11.07	7.44	0.729	74.1	1	73	4	2	2	30.04	3238	0.011	2944.62	2	67
45684	2	17.5	8.78	1.433	74.1	2	55	3	4	2	29.79	1623	0.011	17044	1	60
45728	2	10.23	10.05	0.95	74.1	2	62	3	4	2	29.58	1681	0.015	13866.9	1	67
46781	2	7.82	11.04	0.818	74.1	2	71	4	2	2	29.79	1504	0.138	4333.15	2	65
11224	1	15.34	5.67	1.037	74.2	1	78	3	3	2	27.2	2267	113	3044.19	1	19
21558	2	28.54	14.11	1.479	74.2	1	68	1	2	2	42.32	1931	0.064	2568.28	1	34
24529	2	17.27	10.88	1.07	74.2	2	50	4	3	2	18.77	1674	0.065	7402.83	1	32
34656	2	35.67	9.47	3.418	74.2	1	65	4	5	2	35.16	1880	0.04	5531.87	1	57
39958	1	12.6	6.08	1.153	74.2	2	78	1	3	1	23.36	1770	3.12	2464.38	1	58
44492	2	8.86	4.28	0.875	74.2	2	68	3	2	2	32.3	1814	0.011	27113.7	2	61
46141	2	9.22	6.54	0.781	74.2	2	62	2	3	2	29.61	1362	0.029	1251.21	2	61
48951	2	8.21	6.03	1.049	74.2	2	64	1	4	2	30.39	1166	0.029	2181.38	2	60
16867	2	17.34	13.61	0.747	74.3	2	80	1	2	2	27.42	1292	0.021	1464.21	2	27
27862	1	22.74	16.26	0.878	74.3	2	63	1	1	2	26.73	1165	0.011	574.425	2	43
37901	2	26.08	14.22	0.833	74.3	1	77	3	2	1	25.74	1519	0.384	10473.5	1	44
43786	2	22.17	10.9	0.72	74.3	1	71	1	5	2	23.73	1747	0.011	3414.59	2	70
47620	1	19.95	17.37	1.213	74.3	2	71	1	1	2	33.41	1616	0.021	1448.53	1	73
49704	2	8.41	4.53	1.027	74.3	1	69	3	1	1	31.41	1134	0.027	4355.66	2	69
49901	2	12.84	9.81	0.859	74.3	1	64	3	3	2	26	1637	0.011	8707.33	2	62
10426	1	20.33	6.5	1.504	74.4	1	76	3	2	2	27.95	1908	0.011	5054.99	2	16
16131	2	10.3	5.4	1.372	74.4	1	67	1	1	2	27.21	2428	0.021	2521.22	1	22
24707	1	8.94	9.95	0.782	74.4	1	82	3	5	2	24.86	1212	0.046	5078.65	1	31
26832	1	16.57	7.38	0.901	74.4	2	68	3	3	2	27.02	1349	0.698	9739.86	2	32
34911	2	11.93	11.84	1.271	74.4	2	70	3	4	2	22.34	1463	362	18359.5	2	53
44182	2	8.17	7.81	0.601	74.4	1	59	2	2	2	36.89	819	0.089	2036.1	2	61
44268	2	9.15	2.18	0.536	74.4	1	79	1	1	2		1554	0.011	1536.38	1	66
47369	1	10.62	7.01	0.759	74.4	2	75	1	1	2	37	1366	0.017	1811.35	1	66
16777	1	11.78	5.04	1.124	74.5	2	66	4	1	1	25.19	2150	0.011	1682.34	1	16
17728	1	24.9	9.35	0.935	74.5	1	84	3	4	2		1763	0.021	5223.35	2	17
23532	2	22.64	15.76	1.216	74.5	2	67	3	5	2	27.28	1510	0.011	22529.8	2	30
26379	2	3.94	2.58	0.574	74.5	1	65	4	1	2	23.94	1103	91.5	5683.61	2	31
33419	2	11.61	6.81	1.098	74.5	2	70	1	1	1	31.41	1589	0.016	9421.51	1	53
41641	2	6.77	5.76	0.823	74.5	2	80	3	4	2	34.1	1011	0.025	9726.37	1	69
43756	2	13.36	6.66	1.18	74.5	1	64	1	1	2	29.69	1521	0.268	1060.23	2	72
45485	2	5.56	3.29	0.613	74.5	1	52	4	3	2	16.85	2730	546	2882.98	1	59
46876	2	9.89	7.82	1.008	74.5	2	61	2	3	1	27.53	984	0.028	1176.5	2	61
51189	2	14.29	10.82	1.257	74.5	1	57	2	5	2	22.47	1986		1563.88	2	63
18573	2	10.05	4.41	1.102	74.6	2	62	1	1	2	25.93	1261	0.011	474.967	2	17
43618	2	11.43	6.17	0.497	74.6	2	58	2	1	1	26.33	1080	0.102	3802.87	1	72
44878	2	13.47	11.89	1.085	74.6	1	71	3	5	2	17.79	1920	0.018	9970.22	1	60
51332	2	9.23	5.57	0.86	74.6	1	51	4	2	1	38.8	1540	278	5486.1	2	66
11032	2	6.62	6.72	0.448	74.7	2	59	3	4	2	31.39	1357	0.011	21837.8	1	17
11579	2	23.74	19.57	1.878	74.7	1	55	3	4	1	40.19	2395	0.019	26179.6	1	14
12416	1	8.88	6.22	0.756	74.7	2	67	4	3	1	32.21	1223		4761.71	1	16
15922	2	14.63	13.62	0.865	74.7	2	57	3	3	2	24.13	1550	0.011	10105.6	1	23
41770	2	7.39	4.87	0.768	74.7	2	71	2	1	2	31.13	1320	0.024	1552.98	1	72
44479	2	12.53	6.15	0.717	74.7	2	65	1	2	1	37.85	1293	0.044	2790.87	2	71
44515	1	11.13	16.8	1.146	74.7	2	80	3	3	2	19.78	1452		8714.2	2	65
17095	1	17.11	22.45	1.398	74.8	1	80	3	5	2	28.46	1761	0.082	4265.27	2	20
22565	2	15.2	9.34	1.554	74.8	1	74	3	1	1	26.8	1650	23.9	3394.54	2	34
24463	2	8.54	8.16	0.708	74.8	2	59	4	1	2	29.82	1772	0.119	3446.1	1	35
37218	2	12.19	6.49	1.215	74.8	2	80	3	2	2	40.86	1200	0.011	7442	2	47
41464	2	8.25	6.65	0.794	74.8	2	60	3	3	2	48.74	1416	1.14	18505.8	1	44
42529	1	12.34	14.91	1.064	74.8	1	71	3	2	1	39.7	1847	31.6	8343.73	2	62
43029	1	17.1	7.66	1.102	74.8	1	80	2	5	2	27.28	1486		2932.72	1	72
15882	2	8.75	5.19	0.672	74.9	1	68	4	1	2	21.37	1863	0.903	4607.98	2	20
19258	2	63.86	26.15	1.607	74.9	1	58	1	5	2	25.08	2625	1.29	8779.14	2	27
30751	2	23.67	20.51	1.741	74.9	1	85	3	5	2	22.1	1990	0.138	5392.48	2	39
38225	2	7.17	6.01	0.641	74.9	2	85	3	1	2	22.9	1595	0.049	4920.16	2	49
41498	2	14.17	7.62	1.135	74.9	1	68	4	1	2	28.16	1711	0.04	1887.86	1	72
41909	2	9.09	4.79	1.07	74.9	1	69	1	1	1	36.04	1938		1105.79	1	59
45270	2	15.83	12.87	0.673	74.9	1	61	3	5	2	27.84	1480	0.011	11187	1	64
47643	2	25.97	11.78	0.799	74.9	1	80	3	4	2	29.68	2209	0.047	5965.49	2	62
19015	2	8.88	5.98	0.757	75	2	60	1	1	2	28.12	1086	0.035	1205.93	2	17
21134	2	12.3	10.99	1.405	75	1	85	3	2	1	23.77	2286	0.011	5725.25	2	34
35215	2	10.58	6	1.058	75	2	52	4	1	2	34.4	2247	0.019	2590.73	1	51
41558	2	11.34	11.21	0.899	75	2	50	4	2	2	31.72	1785	654	11802.3	2	67
42491	2	9.62	6.61	0.548	75	2	60	2	1	2	34.31	1473	0.017	749.455	2	69
16621	2	8.36	4.13	0.685	75.1	2	80	4	3	2	23.81	1184	0.037	2335.47	1	27
22572	2	7.32	10.25	0.539	75.1	1	70	3	2	2	27.75	1846	140	6836.29	1	39
24046	2	8.45	6.24	0.642	75.1	1	68	3	4	2	36.53	1799	0.031	15767.1	2	33
30838	2	12.37	9.37	1.147	75.1	1	73	3	3	2	43.22	1877	0.011	7432.7	2	39
30859	2	9.75	6.81	1.106	75.1	2	65	3	4	2	23.45	1252	0.035	9200.02	2	30
35349	2	14.47	9.93	0.965	75.1	2	63	3	3	2	19.18	2032	165	24463.1	2	47
44905	1	12.03	13.92	2.266	75.1	2	74	3	4	2	22.96	1838	0.021	7581.22	1	60
46451	2	8.18	7.15	0.742	75.1	2	75	3	3	2	30.01	1310	0.049	6987.82	2	64
11982	2	7.96	7.76	0.861	75.2	1	68	1	1	2	29.85	1434	0.046	281.366	1	15
12246	1	14.45	6.72	1.389	75.2	2	85	3	4	2	20.01	1828	0.105	8815.47	2	23
19702	2	6.94	5.08	0.783	75.2	1	62	3	3	2	28.22	1294	0.209	18208.5	2	17
19876	1	87.23	74.43	1.666	75.2	1	85	3	3	2	27.34	2438	0.024	2884.41	2	14
23253	2	10.69	9.49	1.104	75.2	1	65	3	3	2	29.24	2026	847	7965.83	2	37
27435	2	18.28	10.38	0.878	75.2	1	73	3	5	2	25.87	949	0.011	5846.25	1	35
30858	2	14.12	7.04	1.828	75.2	2	75	5	4	1	31.89	1702	0.04	8631.38	1	33
41514	1	21.32	13.19	0.86	75.2	1	70	3	5	1	29.65	1469	0.028	7350.06	2	63
42599	2	9.18	10.2	1.111	75.2	2	67	3	3	2	29.61	1756	0.011	16296.6	2	60
45391	2	37.95	22.34	1.565	75.2	2	78	4	3	2	21.27	2177	0.011	2952.54	1	59
17409	1	11.76	5.06	1.478	75.3	1	75	4	3	2	31.53	2531	2.27	1076.07	1	21
22417	1	9.99	12.61	0.537	75.3	2	85	4	4	2	41.19	1199		4412.25	1	42
28355	2	5.43	2.47	0.371	75.3	2	76	3	1	2	25.29	662	0.011	8903.28	2	34
29548	2	11.86	14.59	1.121	75.3	1	63	5	3	2	33	2219	312	9629.81	1	34
36941	2	9.13	6.01	0.807	75.3	2	66	3	3	2	33.01	1214	0.197	10033	2	49
38562	2	20.17	9.82	1.062	75.3	1	81	3	3	2	29.44	1475	0.44	3185.6	1	48
44876	2	11.37	8.57	0.57	75.3	2	55	1	2	2	25.35	1685	613	2862.68	1	65
12722	2	10.58	8.64	0.943	75.4	2	76	3	3	2	20.72	1705	0.011	8822.49	2	19
18693	2	10.48	4.48	0.891	75.4	2	56	3	4	2	21.63	1744	192	19646.5	1	21
25996	2	9.7	10.21	0.702	75.4	1	73	1	1	2	24.82	1520	113	1069.29	1	34
39400	2	31.58	16.97	2.648	75.4	2	67	3	4	2	26.51	2499	0.042	23197.8	2	47
43047	1	34.08	7.17	0.959	75.4	2	71	5	3	1	22.15	1588	0.091	10897.7	1	59
45267	2	12.17	5.4	1.222	75.4	1	69	3	5	2	28.93	1455	0.068	15601.9	2	61
46148	2	6.93	6.51	0.886	75.4	2	72	3	3	2	27.04	1454	0.011	6769.58	1	70
46248	2	9.48	15.69	0.874	75.4	2	65	4	1	2	26.16	1951		2250.19	2	67
51201	2	11.66	8.25	0.702	75.4	1	59	3	5	2	29.02	1650	0.021	16237.8	1	71
51384	2	11.31	6.41	1.086	75.4	2	75	3	2	2	50.49	2101	0.015	6914.27	2	63
15451	1	18.4	13.68	0.484	75.5	2	85	2	1	1		1218	0.051	4544.21	2	27
20257	2	19.73	7.11	0.71	75.5	1	85	3	3	1	28.37	1180		3473.78	1	21
21331	2	6.9	4.28	0.695	75.5	2	61	1	3	1		921	0.309	1976.4	2	38
29578	2	12.76	6.41	1.719	75.5	1	85	3	3	2	19.79	1781	0.011	3979.98	1	35
39547	2	21.65	20.19	0.82	75.5	1	83	3	5	2	21.5	1291	0.02	5725.33	1	44
39892	2	13.67	9.98	1.254	75.5	1	60	4	2	2	20.78	2859	222	1011.3	1	51
42094	2	7.62	4.6	0.577	75.5	2	55	4	2	2	31.09	1258	0.412	7344.63	1	65
42537	2	9.74	8.6	0.669	75.5	2	62	4	4	2	29.85	1714	0.082	4506.37	1	59
44582	1	14.18	4.73	0.699	75.5	2	80	3	3	1	22.53	1180	0.025	5824.71	1	67
51165	2	9.92	7.33	1.189	75.5	1	55	2	1	2	29.59	1628	0.011	1269.35	2	69
17096	2	11.46	10.44	1.251	75.6	2	71	4	3	1	39.45	1454	5.92	2105.4	1	24
19380	2	14.29	10.01	0.923	75.6	2	85	2	4	2	24.18	1200	0.055	6085.19	1	24
23730	2	7.84	5.09	0.759	75.6	1	69	3	5	2	27	1236	0.12	8224.2	2	31
24178	2	9.14	7.21	1.012	75.6	2	70	3	2	2	19.22	1692	281	10764.7	1	35
37040	2	8.82	4.21	0.874	75.6	2	51	4	4	1	36.24	1371	0.017	11869.9	2	50
37444	2	48.73	15.77	1.459	75.6	2	71	3	5	2	19.8	2471	0.021	14633.2	2	44
39997	2	6.44	15.32	0.984	75.6	1	61	4	2	2	18.43	1575	507	7731.16	2	53
42379	2	8.18	8.39	0.8	75.6	2	62	2	4	2	28.57	1364	0.045	1143.31	2	68
49113	2	16.52	11.08	1.27	75.6	2	71	4	2	1	30.28	1735	0.139	2798.13	1	65
15614	1	14.25	19.59	1.079	75.7	1	62	4	2	2		1388	278	3295.37	1	14
16215	2	10.72	8.22	0.71	75.7	2	57	3	4	2	29.93	1993	0.06	11194.3	1	26
24860	1	6.56	10.24	0.558	75.7	1	66	3	4	1	27.48	1229	2.21	4197.18	1	41
26374	2	10.94	11.96	0.885	75.7	2	56	3	5	2	23.94	1328	0.011	50419.3	1	31
27957	2	14.27	7.73	1.38	75.7	2	72	3	4	2	33.98	1893	0.011	7696.2	2	30
28293	2	20.26	12.3	1.354	75.7	2	70	1	1	1	29.96	1354	0.095	2080.82	2	35
35122	2	18.68	6.08	0.824	75.7	2	70	3	3	2	29.65	1708	0.011	8379.63	2	53
43111	2	10.81	7.78	0.77	75.7	1	62	2	1	2	34.02	1806	0.079	1234.11	1	62
43829	1	6.93	6.85	0.67	75.7	2	73	4	2	1		1172	0.638	1932.35	1	64
44086	2	12.29	14.25	1.811	75.7	1	50	4	3	2	34.42	4807	0.474	5952.12	2	66
44433	2	12.86	12.71	1.349	75.7	1	66	3	3	1	29.39	2136	0.018	11201.2	1	61
44629	2	7.94	11.1	0.86	75.7	1	57	4	1	2	20.3	1972		2917.75	2	64
45118	2	10.73	6.44	1.074	75.7	2	77	3	3	2	34.63	1716	0.052	14695.2	2	59
46787	2	21.59	11.56	0.963	75.7	2	57	3	5	2	21.45	808	0.011	44983.7	2	67
49682	2	10.21	6.4	0.899	75.7	2	73	1	1	2	29.71	1340	0.011	1874.47	1	60
10962	2	7.47	6.06	0.918	75.8	1	66	4	3	2	33.26	1599	0.136	4936.98	1	14
11090	2	10.32	6.46	1.37	75.8	2	70	3	4	2	23.57	1250	0.011	16261.4	2	22
12331	2	13.14	14	0.852	75.8	1	64	3	3	2	22.25	1912	1.14	20666.7	2	27
15121	2	9.8	9.1	0.646	75.8	1	70	3	5	2	29.28	1066	0.018	4917.62	2	21
17636	2	5.79	2.41	0.514	75.8	1	66	4	1	2	31.24	777	0.653	1966.3	1	20
18292	2	12.09	7.29	0.684	75.8	1	72	3	2	2	29.58	1950	0.043	8297.91	2	17
22146	2	6.8	9.89	0.456	75.8	1	60	1	1	2	18.55	940	0.079	2325.85	1	34
24003	2	9.31	6.15	0.774	75.8	2	68	1	1	1	31.06	1298	0.015	687.13	2	38
31280	2	13.72	7	0.992	75.8	2	60	3	3	2	31.32	1719	0.258	8335.65	1	44
33577	2	8.86	8.79	1.094	75.8	2	55	3	4	2	27.58	1196	0.051	13424.1	1	52
34647	1	6.27	6.82	0.854	75.8	2	70	3	2	2	18.21	1069	130	8024.68	2	50
48851	2	12.56	12.16	1.102	75.8	2	60	1	2	1	46.1	1752	0.027	908.182	1	64

## Sheet: Sheet3
SEQN	cataract	iron	zinc	copper	sele	gender	years	race	education	diabetes	BMI	calore	cottine	weight	SDMVPSU	SDMVSTRA
10051	2	6.3	12.3	0.497	75.9	2	74	4	1	2		919	586	2886	2	20
17867	2	10.17	6.02	0.882	75.9	2	70	3	3	2	22.54	1126	0.011	9023.47	2	21
20791	1	5.64	6.42	0.487	75.9	2	83	3	3	2	29.52	1196	0.011	2878.63	1	21
26049	2	12.48	10.75	1.24	75.9	1	78	3	3	2	28.06	1595	0.031	13602.4	2	39
35718	1	12.71	8.97	1.256	75.9	2	77	3	3	2	28.44	2335	0.011	22289.3	1	52
40711	2	26.8	6.39	1.411	75.9	1	68	4	3	2	21.97	2331	561	1195.11	1	52
45909	1	24.05	20	1.125	75.9	1	80	3	3	2	28.89	1107	0.011	6662.44	2	61
51286	2	7.25	4.81	0.947	75.9	2	77	1	1	1	31.25	1017	0.019	5863.74	2	65
12413	1	42.59	11.22	1.169	76	2	85	3	5	2	23.38	1998	0.035	3959.77	1	26
21066	2	15.4	8.38	1.525	76	2	76	2	3	2	26.22	1590		16076.4	2	35
24791	2	8.32	6.95	0.595	76	1	68	1	1	2	23.91	1309	0.066	808.895	1	34
26989	1	10.32	8.66	1.062	76	2	68	3	5	2	28.82	1915	0.011	10591	2	35
35887	2	12.08	8.57	1.842	76	1	73	3	5	2	27.58	1531	0.051	16228.3	1	57
36277	2	16.67	13.25	1.818	76	2	65	3	5	2	24.49	1361	0.064	21073.2	2	53
47396	2	24.33	4.04	1.153	76	2	75	2	5	2	23.82	1167	0.026	3949.46	1	72
13489	2	10.65	12.1	0.813	76.1	2	74	4	3	2		1211	0.175	2889.23	1	20
21371	2	11.57	9.41	1.003	76.1	1	68	3	1	2	25.38	1585	0.021	8473.63	2	30
22335	2	4.87	4.85	0.483	76.1	2	58	1	4	2	26.42	1104	0.07	3089.43	1	31
34504	2	13.71	10.47	1.167	76.1	2	58	5	3	2	40.26	2269	0.101	32249.4	1	51
47179	2	67.12	16.25	1.199	76.1	1	62	3	5	2	25.18	1611	0.011	14761	2	73
15776	2	10.98	20.08	2.017	76.2	2	67	3	3	2	23.6	1596	0.011	15109	2	20
17542	2	17.46	16.67	1.917	76.2	1	68	3	3	2	25.52	2588	0.011	20821.6	1	17
19134	2	10.85	7.08	1.325	76.2	2	66	1	4	1	26.51	1339	0.011	2193.26	1	15
22889	1	13.99	8.48	1.08	76.2	2	82	3	4	2	18.94	1387		4761.78	1	37
27480	2	10.01	8.44	0.682	76.2	1	63	1	4	1	22.28	1447	188	2330.47	2	38
35175	2	10.46	5.42	1.024	76.2	2	85	3	5	2	31.72	1368	0.011	5236.52	2	44
36617	2	12.31	7.69	0.828	76.2	1	68	3	3	1	26.76	1602	0.017	23422.3	1	49
37386	2	8.44	7.45	0.879	76.2	1	61	1	3	2	28.5	1414	0.062	5721.88	2	53
41578	1	7.43	10.4	0.792	76.2	2	67	3	5	2	19.69	1060	0.011	18003.5	1	60
44276	2	9.16	7.12	0.512	76.2	1	76	3	2	1	39.19	1241	533	3079.33	2	59
18242	2	12.29	8.69	0.945	76.3	1	85	4	1	2	21.73	1533	0.011	3039.42	2	20
19398	2	13.17	10.62	1.814	76.3	1	69	4	4	2	35.99	2305	170	2731.04	1	24
23644	2	10.62	9.98	0.771	76.3	2	60	1	4	2	28.13	1834	0.011	2535.81	2	38
33534	1	17.29	10.23	0.881	76.3	1	78	3	1	2	24.34	1105	0.011	7475.12	2	44
35573	2	9.43	7.25	0.931	76.3	2	63	1	1	2	27.15	1936	0.011	839.421	1	56
41158	2	7.75	4.01	0.676	76.3	2	71	3	5	2	30.07	1129	0.029	10649.4	2	49
50785	2	8.48	6.97	0.754	76.3	2	60	4	4	2	22.87	1568	376	1777.03	2	68
10168	2	9.17	4.75	0.657	76.4	1	70	1	1	2	18.86	1275	90.6	585.546	1	25
13730	2	9.79	4.84	1.15	76.4	1	77	3	4	2	26.44	1763	0.392	11738.6	2	14
34994	1	15.7	7.84	1.058	76.4	2	65	2	1	1	25.28	1801	0.073	7245.59	2	49
36472	1	14.38	10.97	2.37	76.4	2	82	3	2	2	30.34	1802	0.011	5601.58	2	46
45845	2	13.73	12.77	1.805	76.4	1	75	3	4	2	31.73	2494	0.032	7500.2	2	72
15666	2	9.7	5.25	0.702	76.5	2	73	3	1	2	27.82	1141	0.029	11621.5	1	23
19147	2	6.38	3.15	0.688	76.5	1	76	3	1	2		1234	1040	4650.64	2	18
21396	2	5.71	7.82	0.63	76.5	2	61	1	1	1	25.11	1746	262	592.104	2	38
35208	2	13.66	5.49	0.856	76.5	1	56	3	3	1	33.5	1127	0.036	34665.6	2	49
43237	2	16.89	9.13	1.26	76.5	1	68	3	3	2	23.35	1635	0.024	11201.2	2	63
14435	2	11.9	9.17	1.544	76.6	1	79	3	3	2	22.39	1674	0.011	4543.89	1	22
15590	2	12.47	7.75	1.46	76.6	2	70	3	3	2	28.46	1784	0.527	12388.9	1	23
17629	2	9.61	13.3	0.628	76.6	1	74	1	1	1	24.95	910	203	877.309	2	17
23985	2	13.22	6.42	1.736	76.6	2	66	3	4	1	29.46	1126	0.011	7907.61	2	29
25039	2	10.56	8.37	0.952	76.6	2	77	3	4	2	24.52	1475	0.036	20544.6	2	39
30730	2	8.63	5.01	0.729	76.6	2	75	3	4	2	24.09	1435	0.016	10631.3	1	32
35161	2	13.54	9.46	1.356	76.6	2	62	1	1	1	27.98	1370	0.011	2057.35	2	54
35232	2	7.87	5.2	0.902	76.6	2	67	1	3	1	27.56	1348	0.011	2347.18	1	57
47801	2	12.74	6.28	1.138	76.6	1	63	3	2	2	40.34	2080		16697.1	2	59
14601	2	18.55	11.99	1.037	76.7	2	61	1	4	2	29.88	2141	0.043	779.609	2	27
21541	2	8.69	8.09	1.019	76.7	2	61	3	3	2	35.13	1421	1.47	18650.5	2	31
39522	1	13.29	7.88	1.208	76.7	1	68	4	1	1	28.72	1213		2939.3	1	51
40940	2	12.12	16	1.589	76.7	1	85	3	3	2	21.86	1952	0.047	9623.28	2	46
42365	2	13.81	8.23	0.659	76.7	2	58	3	4	2	33.98	2293	0.011	45353.4	2	72
44117	2	6.95	6.64	0.605	76.7	2	67	4	2	2	24.19	1706	0.011	2343.5	1	59
44899	2	24.59	21.63	1.186	76.7	2	76	3	3	2	29.57	1232	0.093	11524.6	1	61
16481	2	8	6.91	0.704	76.8	1	57	4	5	2	22.76	1866		1867.1	2	26
32727	2	9.7	8.52	0.727	76.8	1	65	4	2	2		2443	303	2115.98	2	51
33894	2	9.71	9.89	1.259	76.8	2	63	3	4	2	34.35	1676	0.624	14434.4	1	49
44332	2	34.2	21.12	3.813	76.8	2	78	3	5	2	38.76	2769	0.011	7448.15	1	61
46172	2	14.16	4.71	0.547	76.8	1	66	3	2	2	21.37	1421	0.104	4000.08	1	67
10207	2	10.17	8.84	0.751	76.9	2	66	3	4	2	42.03	1576	0.011	23469.9	2	19
13056	1	16.4	9.13	1.423	76.9	2	70	1	2	1	31.4	1041	0.134	2017.57	2	20
15970	2	12.66	8.11	9.451	76.9	2	68	3	3	2	26.15	1528	0.011	18394.6	1	23
22007	2	20.26	13.34	0.772	76.9	1	74	1	1	2	26.04	1700	0.02	891.065	2	38
24759	1	27.4	18.56	0.549	76.9	2	68	3	4	1	32.21	1213	261	10615.8	1	29
27209	2	6.74	9.07	0.696	76.9	2	71	3	3	2	25.77	1242	0.011	20721.5	1	31
29593	2	9.48	5.47	0.725	76.9	2	59	3	5	2	20.46	1346	0.021	33123	1	42
34620	2	34.47	9.72	2.052	76.9	2	67	4	3	2	24.76	2935	0.038	4102.12	1	49
45348	2	9.75	6.65	1.251	76.9	2	67	3	5	2	24.96	1562	0.017	22403.6	1	63
46933	1	36.03	18.02	1.795	76.9	1	62	4	2	1	22.61	2081	0.078	2771.76	2	68
47274	2	9.62	10.23	0.684	76.9	2	62	1	4	1	39.76	1211	2.01	1442.68	1	65
48279	2	14.97	6.48	0.927	76.9	2	55	2	3	2	29.64	1813	0.011	2053.65	2	66
51185	1	9.16	8.84	0.808	76.9	1	79	4	3	2	24.32	1274	0.052	2601.72	1	68
17122	2	9.51	10.48	0.766	77	1	55	2	4	2	32.36	1621	1.28	9617.27	1	16
17580	2	13.41	14.3	1.195	77	1	63	3	5	2	32.64	2207	0.011	8478.98	1	17
18028	2	10.33	7.95	0.929	77	2	69	3	3	2	26.39	2516	0.053	14355	2	22
22542	2	18.41	7.91	0.989	77	2	75	3	5	2	25.15	1421	0.019	7308.86	2	29
37115	2	13.08	7.63	0.674	77	2	62	1	1	1	30.88	1424	0.165	817.478	1	53
39161	2	16.35	10.73	0.824	77	2	56	3	4	2	38.83	1209	0.011	38000.7	2	44
43768	2	8.59	7.03	0.776	77	2	58	3	3	1	26.94	1302	204	6987.62	2	60
46112	2	8.05	5.09	0.75	77	2	76	3	3	2		1043	0.011	8239.67	2	66
47868	2	16.96	5.96	1.232	77	1	72	4	5	1	27.05	1236	0.066	2267.99	1	74
27153	2	8.51	7.43	0.862	77.1	1	61	3	4	2	38.62	2455	342	13268.8	1	33
44684	2	7.14	6.32	0.491	77.1	1	61	4	1	2	42.45	1393	436	2711.32	2	67
49181	2	10.04	5.54	0.526	77.1	1	80	3	1	2	21.71	1111	83.3	4434.18	2	62
11385	1	8.68	3.8	0.601	77.2	2	77	3	4	2	26.75	1739	0.011	5164.39	1	22
15100	2	24.47	8.95	1.397	77.2	1	81	3	3	2	22.09	2008	0.6	6398.41	2	23
16409	2	7.08	2.95	0.397	77.2	1	80	3	2	2	27.86	660	0.7	4746.24	1	22
35041	2	18.22	7.98	1.723	77.2	2	76	3	4	2	25.37	1875	0.082	12693.4	1	47
37208	2	17.83	7.31	1.486	77.2	2	70	3	4	2	26.33	1546	0.017	17978.3	2	47
45169	2	27.44	10.04	0.796	77.2	1	60	3	4	2	33.69	2661	0.025	10077.3	2	63
12618	2	13.02	9.93	1.069	77.3	2	62	3	4	2	38.18	1914	1.95	8480.47	1	23
14903	1	12.01	10.93	1.983	77.3	1	72	3	5	2	24.2	4191	0.049	2867.63	2	16
15382	2	9.99	9.49	0.85	77.3	2	62	3	2	2	27.11	2016	0.035	10272.8	1	27
19256	1	25.25	22.8	1.404	77.3	2	84	3	3	1	36.98	1408	0.029	5743.93	1	21
30310	1	12.52	9.12	1.032	77.3	2	85	3	4	2	25.49	1428	0.011	5453.21	1	29
30758	1	8.65	5.14	0.526	77.3	1	80	3	1	2	31.03	1907	289	3467.31	2	31
38414	2	15.96	13.67	1.159	77.3	2	61	4	4	2	29.93	2101	0.078	1318.34	2	45
42402	2	10.98	9.25	0.998	77.3	2	61	1	4	2	24.28	1723	0.02	1406.35	2	72
45281	2	8.38	5.59	0.604	77.3	1	64	3	1	2	24.54	1424	222	12202	2	59
11216	2	8.56	7.81	1.25	77.4	2	85	3	5	2	30.79	1492	0.017	2872.54	1	14
14334	1	27.36	19.15	2.12	77.4	2	62	3	3	2	25.23	2073	0.015	19285.4	2	15
18453	2	4.97	3.91	0.892	77.4	2	71	1	3	2	20.33	1606	148	1505.15	2	27
20547	1	7.2	6.82	0.552	77.4	1	72	3	4	2	33.29	954	0.049	14032.2	2	22
24330	1	7.16	5.81	1.04	77.4	1	72	1	1	2	26.35	1226	97.1	1145.05	1	34
24671	2	9.75	6.2	0.845	77.4	2	72	4	4	2	26.68	1096	2.22	5804.22	1	39
37075	2	8.84	5.69	0.917	77.4	2	61	4	5	2	18.53	1764	0.041	4102.12	1	51
42814	1	5.28	4.34	0.378	77.4	2	80	4	3	2	32.31	922	0.061	2243.07	1	68
45420	1	12.4	12.15	0.985	77.4	2	76	3	4	2	24.5	1471	0.011	14763.7	1	69
47426	2	6.65	5.71	0.755	77.4	2	78	3	3	2	29.64	1337	2.18	8824.93	1	64
50182	2	18.37	10.82	1.747	77.4	2	58	2	4	2	28.58	1584	0.035	9943.79	2	61
36853	1	20.51	4.63	0.718	77.5	1	65	4	4	1	26.51	1104	0.091	1263.44	2	49
37604	2	21.75	10.19	0.565	77.5	2	73	3	1	2	45.18	1256	0.023	9334.63	2	46
40485	2	12.52	9.7	1.473	77.5	2	69	1	3	2	22.06	1659	285	945.962	2	55
42438	2	16.22	16.39	1.676	77.5	2	67	1	3	2	28.48	1819	0.025	3058.91	2	72
45334	2	7.84	6.64	0.95	77.5	1	71	4	1	2	28.35	1517	1.42	2505.23	1	59
50740	1	12.92	5.22	0.711	77.5	2	76	3	3	2	25.35	1371	185	8004.64	1	69
12041	1	56.88	45.36	0.992	77.6	1	85	3	2	2		1674		6003.4	2	18
21084	2	10.42	13.54	0.898	77.6	2	57	3	4	2	29.46	1906	183	17800.3	1	34
35586	1	18.57	13.44	0.861	77.6	2	67	1	2	1	24.19	1272	0.011	658.193	1	58
37116	2	48.77	21.56	1.61	77.6	1	74	3	4	2	31.31	1938	0.18	10225.9	1	44
37615	2	43.67	16.43	1.398	77.6	1	83	3	5	2	24.84	2040	0.011	6266.32	1	45
37741	2	8.74	4.16	1.544	77.6	2	54	4	4	1	24.96	1131	0.042	5279.81	1	44
39190	2	12.95	6.99	0.944	77.6	1	85	3	5	2	17.34	1129	0.011	3521.01	2	49
39790	2	7.83	4.88	0.854	77.6	2	69	3	3	2	26.57	1349	0.011	43894.2	2	46
11894	2	16.58	16.66	2.634	77.7	2	80	3	5	1	36.19	2710	0.011	6909.12	1	19
18804	2	15.61	15.25	0.82	77.7	1	76	1	4	1	33.83	1644	0.011	1201.71	1	15
23796	2	8.51	5.66	0.794	77.7	2	68	4	2	2	35.72	1284	0.617	1692.51	1	30
41583	2	8.3	10.17	0.613	77.7	2	66	2	1	2	35.87	1152	0.011	788.324	2	69
14448	2	12.88	14.03	0.746	77.8	2	67	3	4	2	33.11	1291	0.011	7087.16	1	17
19277	2	15.56	12.52	1.293	77.8	2	81	3	4	2	28.4	1820	0.011	7472.92	1	18
25769	2	18.64	9.34	0.829	77.8	1	85	3	3	2	21.73	1406	0.17	2801.36	2	32
27474	2	11.22	10.96	1.094	77.8	1	85	3	5	2	25.23	1559	0.019	4245.18	2	39
17347	2	4.23	7.95	0.474	77.9	2	59	3	5	2	22.51	1193	0.041	11935.9	1	19
23257	2	9.71	7.26	1.097	77.9	2	73	4	3	2	24.01	1204	0.026	3722.85	1	36
48991	2	9.64	10.75	0.607	77.9	1	66	4	4	2	26.16	1454	344	2196.85	1	59
51487	2	13.58	8.86	0.882	77.9	2	70	1	1	2	37.71	1934	0.021	2746.15	2	69
27643	1	9.83	11.36	0.763	78	1	70	3	1	1	24.12	1871	610	6679.26	2	31
30518	2	7.1	6.42	0.441	78	2	65	1	1	2	27.9	948	0.024	615.628	1	34
31098	2	7.63	8.02	1.123	78	1	83	3	5	2	24.21	1146	0.058	2001.16	2	41
31633	1	13.22	12.43	1.051	78	2	85	3	2	2	29.57	1587	0.011	6205.49	2	47
39727	2	25.7	12.47	0.686	78	1	72	3	1	2	25.57	1445	0.038	6381.97	2	49
40954	2	11.27	8.41	1.536	78	1	69	4	2	2	22.53	2289	158	3176.67	1	48
47846	1	7.92	9.68	1.161	78	1	79	3	2	2	38.94	1324	0.031	2583.5	1	60
49420	2	9.11	7.18	1.44	78	2	80	4	2	1	36.92	1833		1893.8	1	74
16526	1	6.33	5.17	0.497	78.1	2	85	3	3	2	22.68	1284		8552.72	1	14
27259	1	10.13	8.2	1.061	78.1	1	81	3	5	2	28.22	2672	0.011	3556.59	1	29
30339	2	12.96	12.68	0.754	78.1	2	56	3	5	2	24.66	1673	0.035	40954.6	1	31
32586	2	8.52	6.45	1.031	78.1	2	67	3	5	2	27.98	1513	0.011	34006.2	1	49
45124	1	12.39	9.38	0.948	78.1	1	66	4	3	1	47.11	1934	361	2493.79	2	64
11820	2	19.01	12.59	0.781	78.2	1	58	4	2	2	44.11	3017	0.034	2250.13	1	18
19890	2	37.23	22.74	0.937	78.2	2	77	3	4	2	27.46	2082	0.011	13353	1	19
19932	2	14.93	12.37	1.483	78.2	1	59	1	1	2	31.53	3037	0.011	1945.09	2	22
21859	1	11.05	9.92	0.785	78.2	2	73	5	3	2	28.62	1871	49	16191.1	2	43
47024	2	20.21	13.01	2.068	78.2	2	68	3	1	1	29.79	1741	0.081	6340.02	2	59
14819	2	10.07	4.48	0.815	78.3	2	62	3	5	2	24.56	1663	52.3	8962.94	2	18
16506	2	9.68	9.48	0.914	78.3	2	61	3	3	2	28.67	1583	0.048	17315.1	1	19
21994	1	10.47	5.88	0.817	78.3	2	85	3	3	2	22.3	2284		4823.38	2	39
32294	1	9.73	6.85	0.809	78.3	2	77	3	3	1	26.79	1374	0.037	10649.4	2	49
38063	2	18.04	15.65	1.092	78.3	1	71	3	3	2	24.91	2358	0.019	9783.9	2	47
49172	2	14.83	13.26	0.57	78.3	2	65	3	4	2	26.33	1559	264	16837.1	2	74
51098	2	10.32	7.57	0.942	78.3	2	60	1	4	2	27.79	1279	0.011	2834.29	2	71
17939	1	9.91	9.41	0.967	78.4	2	68	3	2	2	28.48	1827	0.036	16975.9	2	22
25154	2	12.56	11.29	1.478	78.4	1	64	3	1	2	32.27	2541	674	12107	2	36
27641	2	13.5	7.5	1.169	78.4	2	56	3	3	2	33.95	1938	0.351	18381.5	2	34
30836	2	8.11	7.89	0.964	78.4	2	63	3	3	2	25.75	1538	0.107	35394.4	1	31
31279	1	12.15	5.57	0.894	78.4	2	76	3	2	2	22.69	2235	0.011	15874.6	1	55
43302	2	8.86	7.46	0.874	78.4	2	68	3	3	1	39.98	1455	0.726	8610.01	2	60
46194	2	22.14	7.71	1.346	78.4	2	75	3	3	2	27.31	1620	0.011	10336.3	2	61
47825	2	19.01	8.21	0.912	78.4	2	69	2	3	1	21.97	1301	0.011	2073.19	1	72
48513	2	6.24	8.48	0.696	78.4	2	61	4	5	2	27.88	1295	0.026	3748.66	1	74
23614	2	9.94	7.62	0.566	78.5	2	68	3	4	2	46.18	1661	0.294	8413.88	2	39
25856	2	16.82	7.44	0.967	78.5	2	70	3	3	2	31	1736	0.139	13546.1	1	32
30195	2	10.08	5.83	1.295	78.5	2	52	4	4	2	33.04	1797	0.06	10768.4	1	36
30234	2	11.36	4.82	1.083	78.5	2	73	3	3	2	19.65	1518	0.036	9177.03	1	29
33691	2	11.84	11.66	1.104	78.5	2	58	4	3	1	33.79	1454	0.027	15011.9	1	49
35883	2	33.28	18.28	1.291	78.5	1	68	3	5	2	27.14	2232	0.011	29911.4	2	47
39448	2	6.31	3.98	0.574	78.5	2	60	5	5	2	19.76	1329	0.026	13318.8	2	53
40318	2	8.12	4.26	0.803	78.5	1	74	5	5	1	29.28	862	0.011	3262.34	1	55
44029	2	15.28	7.17	2.212	78.5	2	70	3	5	2	26.1	1924		12441.8	2	70
45808	1	7.15	5.69	0.731	78.5	2	80	3	5	2	29.54	1077	0.035	11280.9	2	60
10913	2	6.51	7.36	0.466	78.6	2	64	4	2	2	31.17	1112	0.147	1670.46	1	27
11138	1	17.72	13.49	0.98	78.6	2	77	3	4	2	30.02	1779	0.047	9626.01	1	20
11926	2	21.43	11.02	0.995	78.6	1	78	3	1	2	27.31	1728	0.011	5195.2	1	19
16695	2	6.82	5.65	0.564	78.6	2	81	3	3	2	22.91	1085		9197.42	2	16
24644	2	14.8	7.24	1.146	78.6	1	78	3	1	2	26.03	1755	0.037	2659.67	2	30
27529	2	10.07	9.18	0.667	78.6	1	63	3	5	2	28.77	1551	0.031	29657.4	1	31
29412	2	11.78	7.09	1.273	78.6	1	71	4	5	1	25.39	1503	0.045	1613.71	1	36
39872	2	11.28	9.59	0.879	78.6	1	64	3	3	2	26.83	2294	183	10078.6	2	46
14850	2	11.35	6.72	0.776	78.7	2	50	4	2	2	30.2	1423	0.011	3563.43	2	18
18605	2	11.75	6.21	0.553	78.7	2	57	3	4	2	23.18	1688	336	8186.24	1	22
20490	1	19.23	6.8	0.883	78.7	1	84	3	4	2	28.78	1339	0.017	3091.2	2	16
27199	2	17.61	9.53	0.518	78.7	2	71	3	3	2	29.11	825	0.011	7005.52	2	29
32969	2	11.84	8.22	1.889	78.7	1	78	4	3	2	25.29	2786	0.039	2569.67	1	51
48346	2	13.28	8.82	0.698	78.7	2	68	3	2	2	28.44	1208	0.019	23398.1	2	63
48628	1	9.13	6.24	0.843	78.7	1	66	4	4	2	24.82	2346		1575.72	1	59
49662	2	8.73	8.26	0.765	78.7	2	74	3	3	2	20.54	1669	0.011	11259.2	1	67
24504	2	10.96	9.34	1.039	78.8	1	72	1	1	2	26.79	1693	0.049	1996.97	1	33
26341	2	9.71	8.36	0.554	78.8	1	67	4	1	1	21.44	1637	0.04	5348.4	1	32
29536	2	9.26	6.42	0.705	78.8	2	65	4	2	2	26.17	1361	537	5068.72	1	36
31232	2	13.95	8.15	1.443	78.8	2	56	4	3	2	29.1	4674	0.036	13201.5	1	47
20746	2	12.43	8.14	1.191	78.9	1	59	3	4	2	32.06	1620	0.465	27848.8	1	19
21728	2	6.49	7.59	0.917	78.9	1	59	3	5	1	26.08	1344	0.341	23233.2	2	36
35569	1	10.28	8.89	0.825	78.9	1	85	3	3	2	22.59	1582	0.016	4647.88	1	55
42065	2	15.35	13.52	1.64	78.9	2	59	1	3	2	28.02	1976	0.088	7089.2	1	66
16346	1	13.75	7.29	1.178	79	1	85	3	1	1		1655	0.015	5783.34	2	21
17197	2	36.84	32.87	0.948	79	2	72	3	3	2	24.66	1628	0.011	8950.45	2	21
20995	2	22.14	7.38	0.726	79	2	81	3	4	1	23.53	1253	0.011	3587.29	1	17
31442	2	12.41	13.28	1.248	79	1	67	1	4	2	29.37	2359	0.036	3906.34	2	55
41030	2	17.75	12.42	1.119	79	2	74	3	4	2	24.03	1634	0.081	9351.5	1	46
46528	2	10.75	6.41	1.312	79	1	76	3	4	2	28.12	1689	0.028	11279.3	1	67
9968	1	10.6	6.45	1.06	79.1	2	84	3	2	2	24.62	1338	0.011	8346.49	2	20
15741	1	9.53	10.47	0.727	79.1	1	85	3	2	2		1225	0.033	3219.88	2	23
18103	1	8.27	10.77	0.603	79.1	2	73	4	1	1		1225	5.99	3135.36	2	20
23815	2	12.51	7.93	0.913	79.1	1	65	1	1	2	38.51	1364	0.104	2161.16	1	34
24002	2	9.98	9.4	0.945	79.1	1	70	3	3	2	35.1	2390	233	14635.5	1	29
26653	2	10.03	8.53	1.102	79.1	2	81	3	3	2	28.8	1747		9071.19	2	39
26799	1	10.05	7.81	1.02	79.1	2	80	3	2	2	32.51	1620	0.011	7858.72	1	33
36686	2	16.01	5.23	0.823	79.1	1	62	4	2	1	21.86	1781	0.111	2049.04	1	49
41156	2	11.19	7.47	0.799	79.1	1	65	1	1	2	27.43	1727	0.094	2548.26	2	56
43535	2	13.01	13.38	1.284	79.1	1	71	3	5	2	30.97	2156	0.011	7629.09	2	59
36731	1	9.05	5.94	1.608	79.2	2	85	3	4	2	25.99	1372	0.023	9327.77	1	45
44572	2	14.74	6.35	0.674	79.2	2	60	4	2	2	27.14	1200	0.023	2259.38	2	72
49074	1	8.21	8.24	0.581	79.2	1	80	3	2	2	25.72	1449	0.416	5016.81	1	61
16295	2	17.2	8.52	1.662	79.3	1	77	4	1	2	26.64	1637	245	3150.21	1	27
17275	2	13.34	18.06	0.686	79.3	2	59	3	3	2	41.5	1331	0.02	31337.5	2	24
17369	1	12.49	10.52	0.966	79.3	2	82	3	2	2		2042	0.011	4357.96	1	16
23605	2	17.17	10.1	0.716	79.3	1	85	3	1	2	20.82	1424	57.9	2631.04	2	34
37593	2	16.62	8.76	0.998	79.3	1	73	4	3	2	27.81	872	0.011	2291.17	2	49
41492	1	16.11	11.61	2.696	79.3	1	72	3	1	2	29.02	2039	0.021	2090.28	1	62
42502	2	12.32	10.16	1.044	79.3	1	64	2	4	2	35.89	1673	0.011	3555.81	2	66
46184	2	10.79	11.14	1.214	79.3	2	58	4	4	1	29.02	2182	0.011	3889.23	1	74
15432	2	7.68	5.58	0.868	79.4	2	73	3	4	2	44.21	1193	0.016	12486.8	2	21
22604	2	4.35	7.38	0.619	79.4	2	61	1	1	1	31.1	1406	185	2482.76	2	38
38206	2	8.43	6.28	0.664	79.4	2	73	3	3	2	26.91	1380	0.011	13950.9	2	51
40225	2	31.48	15.5	0.799	79.4	2	66	3	4	2	26.1	1506	0.021	19643.1	1	57
41181	2	19.21	6.68	0.997	79.4	2	66	4	1	2	35.22	1784	0.08	4856.29	1	48
10165	2	20.28	14.34	1.191	79.5	1	75	3	3	2	23.63	2030	0.04	8616.46	1	23
18206	1	10.94	11.47	0.848	79.5	2	78	1	3	2	24.97	1443	142	1433.65	2	27
41870	2	8.96	8.62	0.85	79.5	1	59	1	2	1		1670	0.017	8217.99	1	71
44811	2	12.29	7.44	1.416	79.5	2	67	3	2	1	37.92	1795	0.035	16036.7	2	60
18711	2	5.8	3.87	0.505	79.6	2	71	4	1	2	25.1	1149	0.102	2414.63	1	14
37338	2	10.6	7.9	1.07	79.6	1	71	3	3	1	34.63	2031	0.011	7534.94	2	54
43887	2	11.76	10.34	1.094	79.6	2	80	1	1	2	21.64	1930	0.069	5103.76	1	66
47308	2	7.12	3.86	1.359	79.6	2	61	4	2	1	22.81	1236	148	1864.55	1	68
20354	2	11.63	7.32	1.235	79.7	1	68	1	2	2	33.45	1701	0.011	274.551	2	28
31513	2	11.39	13.12	0.852	79.7	1	65	4	3	2	23.18	1648	0.115	4999.09	2	52
34234	2	7.94	5.26	0.814	79.7	1	65	1	1	2	26.72	1235	0.022	855.95	2	58
35784	1	14.96	4.95	0.52	79.7	2	78	1	1	1	33.42	1187	0.011	2808.35	2	53
37025	1	20.94	14.61	1.189	79.7	1	83	3	3	2	21.13	1962	0.011	4969.91	1	54
39424	2	17.96	11.54	0.752	79.7	2	66	3	5	2	24.03	1540	0.019	25608.2	2	44
46028	1	16.1	10.01	1.755	79.7	2	80	3	3	2	28	1812	0.383	10128.4	2	61
14293	1	7.1	4.87	0.592	79.8	2	71	1	2	2		748		889.627	1	28
18501	2	15.48	13.54	1.278	79.8	2	67	3	5	2	24.66	1386	0.011	7550.12	1	21
18889	2	7.26	6.54	1.061	79.8	2	74	1	3	2	35.82	947	0.112	1531.59	2	27
19990	1	10.37	8.56	1.156	79.8	2	70	3	2	2	23.39	1756	276	9130.5	2	23
26092	2	10.07	6.53	0.907	79.8	1	60	3	3	2	27.08	1621	0.301	31426.1	2	31
30135	2	13.46	13.51	0.873	79.8	2	76	3	3	2	29.21	2021	0.011	9109.75	2	32
36390	2	12.04	11.02	0.952	79.8	1	67	4	2	2	29.57	872	266	4765.68	1	50
36649	2	9.01	5.97	1.06	79.8	2	69	1	3	1	32.21	1290	0.011	1954.01	2	54
49559	2	14.18	8.28	0.854	79.8	1	80	3	3	2	20.62	1712	0.479	2936.78	1	59
11641	2	7.32	4.19	0.655	79.9	2	73	3	3	2	25.03	1604	0.091	6826.28	1	19
27227	2	8.36	7.83	0.829	79.9	1	65	3	3	2	29.01	1212	0.036	12815.2	2	36
30354	2	9.88	5.72	1.169	79.9	1	71	4	4	2	28	1654	8.82	1568.19	1	30
36971	2	11.93	4.21	0.767	79.9	2	60	3	5	2	35.62	1543	0.031	30346.1	1	45
41269	2	10	6.5	0.904	79.9	2	64	4	3	2	49.36	1921	0.021	4736.13	2	45
23498	2	12.2	8.26	2.186	80	2	68	1	3	2	24.49	2137	0.011	2438.91	2	38
27770	2	7.96	10.21	0.639	80	2	67	3	1	1	29.9	1432	1.79	5991.03	2	36
34584	2	19.21	11.71	1.597	80	2	68	3	3	2	30.56	2078	0.011	11468.8	2	46
36218	2	7.43	7.65	0.853	80	2	54	4	5	2	29.38	1801	0.023	9412.42	1	52
41771	2	16.87	7.32	1.335	80	2	80	2	2	2	26.75	1752	0.039	2020.65	1	62
42617	2	22.58	6.88	1.282	80	1	71	5	5	2	23.43	2159	0.018	8170.11	2	67
16306	1	11.73	6.65	1.033	80.1	2	81	3	3	1	28.27	1614	0.011	8826.03	1	16
21124	2	10.03	5.55	0.753	80.1	1	55	4	4	1	25.18	1274	0.378	5610.82	2	31
22071	1	10.76	5.44	1.015	80.1	2	78	3	1	1	26.79	1521	0.04	17432.9	2	34
23683	1	7.65	5.07	0.654	80.1	1	58	3	1	1	35.94	916	166	15939	2	34
28794	1	9.65	4.69	0.867	80.1	2	85	3	4	1	27.7	1431	0.045	5534.74	1	38
36346	1	12.28	10.69	1.326	80.1	1	85	3	4	2	21.68	1499	0.011	2049.14	2	50
22202	1	12.58	7.1	0.898	80.2	2	84	3	3	2	33.1	1872		3369.33	1	33
35982	2	9.64	7.44	0.48	80.2	2	59	3	4	2	27.03	1471	0.077	27728.5	2	49
46419	2	7.15	3.23	0.717	80.2	2	72	1	2	1	30.12	764	50.1	4745.54	1	66
12785	2	15.93	9.22	0.835	80.3	1	55	3	3	2	22.63	1813	380	12794.5	2	14
15568	2	9.94	10.74	1.012	80.3	2	57	3	3	2	26.28	1926	0.035	14491.6	1	26
22245	1	12.42	11.47	0.935	80.3	1	85	1	1	2	18.23	1761	0.117	1126.96	1	34
24313	2	11.89	4.28	0.983	80.3	1	66	3	3	2	26.72	1571	0.083	15980.3	2	35
28443	2	8.07	5.26	0.623	80.3	2	74	3	5	2	27.25	826	0.027	7696.2	2	30
35737	2	21.39	12.39	1.458	80.3	2	77	3	5	2	29.63	1937	1.17	11650.7	1	47
40860	2	11.58	10.83	0.923	80.3	1	82	3	1	2		1343	0.017	5395.86	1	48
47490	1	10.76	10.03	1.268	80.3	2	67	3	4	2	20.92	1780	0.028	14481.3	2	63
17051	2	24.38	12.65	0.922	80.4	2	65	3	2	1	41.1	1275	0.037	27220.7	2	24
37551	2	11.96	10.01	1.672	80.4	1	83	3	5	2	27.96	2285	0.032	3968.24	1	46
45051	2	12.45	9.1	0.843	80.4	1	57	4	4	2	33.21	1537	0.483	4399.69	2	67
47533	2	19.1	10.79	1.353	80.4	2	63	3	5	2	30.58	1462	0.047	13639.1	1	67
16496	2	23.6	9.79	1.019	80.5	2	58	1	1	2	32.09	2249	0.015	1349.34	2	17
30081	2	8.9	4.66	0.962	80.5	1	70	1	1	2	26.73	1953	0.04	1026.89	2	38
34590	2	9.13	6.88	0.892	80.5	2	62	3	3	2	27.63	1240	0.011	10708.8	2	55
35688	1	12.7	6.78	0.954	80.5	1	85	3	3	2	28.02	1374	0.05	3457.02	2	49
36147	2	6.07	4.69	0.496	80.5	2	79	3	3	2	28.5	1104	1.47	6133.98	2	49
40912	2	10.09	6.64	1.185	80.5	1	61	1	1	2	26.05	1716	0.011	696.826	2	58
42547	1	8.46	5.19	0.932	80.5	2	79	3	3	2	21.34	1509	0.048	6669.5	1	62
44189	2	10.32	6.39	0.894	80.5	2	55	3	3	2	23.49	1496	0.011	14285.4	2	68
45421	2	14.05	7.38	1.25	80.5	2	69	1	3	2	26.19	1028	0.011	3777.62	1	66
48643	1	7.54	8.14	0.863	80.5	2	79	3	4	2	34.43	1274	0.033	15493.3	2	67
17260	2	8.78	5.29	0.872	80.6	1	54	4	1	2	33.62	1185	236	6261.85	1	21
34807	2	13.11	15.01	1.531	80.6	2	59	3	4	2	32.94	2536	0.018	14984.3	2	48
34997	1	7.25	6.24	1.473	80.6	1	78	3	2	2	21.3	1633	0.02	2380.97	1	48
39051	2	11.34	8.49	0.996	80.6	2	77	3	4	1	27.64	1561	0.03	26504.7	2	49
40118	1	10.84	7.11	1.339	80.6	1	80	1	1	2	23.9	1716	145	5416.79	1	47
43204	1	14.77	8.51	2.295	80.6	2	80	1	2	2	24.66	2224	0.011	3031.5	1	71
45225	2	13.92	10.91	1.745	80.6	1	59	3	3	2	25.44	2309	0.011	17815.8	2	60
46389	2	27.35	22.62	1.218	80.6	1	79	3	5	2	24.27	1608	223	9339.99	1	67
10846	2	10	5.8	0.856	80.7	2	62	1	2	1	36.4	1478	0.011	544.791	2	17
20264	1	13.6	11.32	1.595	80.7	1	73	3	2	2	26.41	2183	0.017	11667.1	2	22
24687	2	14.28	8.72	1.262	80.7	1	61	3	4	2	29.54	1965	170	8727.01	2	32
26218	2	10.57	14.82	1.248	80.7	2	83	3	4	2	20.82	1547	0.011	4329.35	1	33
26501	2	9.31	8.35	0.811	80.7	1	77	1	1	1	26.11	943	0.02	572.509	1	34
29981	2	12	13.23	1.143	80.7	2	69	3	3	2	33.88	2024	0.011	23233.2	2	29
31592	2	18.42	10.76	1.704	80.7	2	62	1	1	2	26.98	1484	0.024	791.361	2	57
32044	2	8.67	4.17	0.512	80.7	2	53	4	5	2	27.23	1158	0.016	11699.2	2	51
33667	2	8.48	6.9	0.962	80.7	1	79	1	2	2	33.58	1567	0.023	3607.12	2	58
38541	2	8.47	5	0.787	80.7	1	80	5	2	2	21.62	1007		4930.58	1	58
44097	1	12.88	9.82	1.479	80.7	1	70	3	5	2		1900	309	5646.46	2	63
45062	2	26.58	10.35	2.752	80.7	1	80	3	4	2	25.62	2455	0.025	10289.1	2	60
47624	2	9.95	9.07	1.245	80.7	2	58	3	3	2	31.88	1324	0.011	43461.6	1	61
51420	2	8.05	6.9	1.069	80.7	2	71	3	4	2	32.76	1622	0.029	8418.29	2	60
12539	2	18.96	15.46	2.037	80.8	1	59	3	4	2	26.04	1422		13717.9	2	18
25148	2	15.21	14.61	2.4	80.8	1	75	3	3	2	27.44	3375	0.011	2848.22	2	39
38796	1	8.22	9.57	0.919	80.8	2	85	3	3	1	35.68	1062	0.011	6350.55	2	53
41717	2	7	5.16	0.723	80.8	2	72	3	2	1	23.87	1001	0.011	11074.2	1	67
49366	1	10.36	8.19	0.996	80.8	2	74	2	1	2	24.67	1720	0.011	1282.36	1	60
12264	1	24.7	20.26	1.388	80.9	1	76	3	4	2	30.68	2018	0.035	3084.87	1	21
27215	2	26.03	13.91	1.492	80.9	1	75	3	4	1	32.23	1980	0.011	11498.8	2	29
30615	1	10.45	7.14	0.872	80.9	1	78	1	1	2	19.61	1488	155	811.9	1	34
34913	2	14.7	16.57	1.735	80.9	2	81	3	4	2	32.83	1421	0.011	4724.19	2	46
36832	2	16.32	13.97	1.454	80.9	2	77	3	5	2	23.47	1557	0.019	17260.2	2	46
47551	2	18.33	15.24	1.401	80.9	1	72	4	2	2	16.97	4321	395	1922.06	2	69
11028	2	18.55	9.93	0.684	81	1	70	3	2	2	22.85	1366	701	4058.42	2	26
15083	1	8.35	3.51	0.958	81	2	84	3	2	2	26.05	1175	0.048	7268.61	1	18
20394	2	24.3	10.84	1.157	81	1	68	4	2	2	26.93	1771	0.049	4108.18	1	20
34899	1	12.43	13.07	1.645	81	2	84	3	4	2	23.18	1223	0.011	15077.1	2	47
38539	2	15.12	13.71	1.649	81	2	70	3	4	2	27.36	2206	0.056	10320.7	2	44
38732	2	7.86	13.41	1.046	81	2	64	4	2	2	41.96	1569	0.051	2284.9	2	45
40248	2	13.98	9.21	1.907	81	2	74	3	2	2		2029	0.011	10094.1	2	44
49121	2	7.76	16.38	0.581	81	1	71	2	1	2	30.9	735	2.95	2141.04	2	61
12716	2	10.05	14.85	0.73	81.1	1	61	3	1	2	26.08	1584	441	6968.65	1	23
39511	2	12.93	7.73	1.289	81.1	2	65	2	2	2	23.42	1994	298	10686.3	1	55
40461	1	13.21	6.13	0.896	81.1	2	82	3	3	2	20.32	1495		4673.35	1	44
45202	1	14.15	10.94	2.418	81.1	1	80	3	5	1	20.98	2149	0.041	5334.11	1	60
45417	2	7.01	8.18	0.508	81.1	2	80	4	2	2	19.54	1587	289	2939.82	1	59
11950	1	10.24	7.27	1.055	81.2	2	85	3	1	2	29.2	1372	0.037	6226.01	1	23
20904	2	11.77	5.95	1.234	81.2	2	64	3	4	2	31.2	1517	0.035	17585.9	1	27
25584	2	11.27	11.98	0.981	81.2	1	78	3	3	2	34.58	1497	0.011	8688.52	1	37
29812	2	12.85	7.05	0.804	81.2	2	79	1	2	1	25.39	1465	0.029	1033.3	2	40
36081	2	8.67	13.95	0.994	81.2	2	59	3	5	2	26.89	1145	112	37447.4	1	55
38958	2	10.14	5.2	1.294	81.2	2	69	4	4	1	55.12	1387	0.095	3454.91	2	48
45530	2	11.2	11.94	1.783	81.2	2	50	4	5	1	34.69	3198	35.1	4268.19	2	71
22407	2	8.8	6.11	0.578	81.3	1	68	4	1	2	31.84	1652	321	3210.97	2	33
26198	2	13.81	8.15	1.007	81.3	1	68	5	5	2	20.05	1598	0.043	18399	1	43
36849	1	10.77	18.65	1.078	81.3	1	80	3	5	2	28.96	1594	0.109	10977	1	45
43418	2	9.85	11.61	1.552	81.3	2	63	4	4	2	33.01	2716	0.16	4017.81	1	62
46514	2	10.54	8.98	1.176	81.3	2	61	3	3	2	25.05	1953	0.011	22530	2	59
48224	2	7	7.17	1.395	81.3	1	59	3	4	2	24.96	2096	105	14123.7	2	63
13049	2	17.21	7.16	0.94	81.4	1	77	1	1	2	27.91	1974	0.021	453.815	1	17
15014	1	63.62	50.63	1.97	81.4	2	84	3	4	2	28.1	2084	0.028	4642.4	1	19
30374	2	8.32	10.56	1.063	81.4	2	73	3	3	2	28.44	2147	0.019	13104.4	2	32
39372	2	10.19	13.36	1.007	81.4	1	66	3	2	1	35.68	1701	314	7131.55	2	44
42629	2	11.91	4.67	0.65	81.4	2	60	1	1	1	36.06	956	0.011	1320.36	1	66
11359	2	10.17	7.9	1.005	81.5	1	64	1	1	1	32.59	1162	0.011	825.142	1	22
12085	2	11.71	10.74	0.93	81.5	1	74	3	4	2	24.6	1912	0.021	8319	1	21
23086	1	7.29	5.41	0.787	81.5	2	85	3	3	2	28.8	1231	0.011	11085.4	1	32
49198	1	10.38	8.57	1.042	81.5	1	79	3	1	2	20.23	1703	0.049	2088.5	1	60
51027	2	8.43	8.74	0.862	81.5	1	61	3	5	2	26.85	1845	1.48	9670.74	2	60
11005	2	10.19	8.86	0.745	81.6	1	67	3	5	2	25.11	1412	0.037	22337.7	2	20
15545	2	8.17	5.35	0.508	81.6	2	54	4	3	2	39.82	1672	0.083	7152.77	1	27
18715	2	13.52	6.23	0.802	81.6	1	76	3	4	1	22.97	1929	0.07	9558.19	1	21
25545	2	15.93	7.7	1.157	81.6	2	64	3	5	2	21.43	1402	0.05	11554.4	1	32
44249	2	11.15	5.31	1.148	81.6	1	57	2	1	1	28.73	1360	0.037	2986.8	1	73
45826	2	15.79	11.98	2.077	81.6	2	62	3	4	2	30.94	1941	0.019	5105.88	1	67
49312	2	8.69	7.45	0.865	81.6	2	51	4	3	1	31.71	1386	118	12553.1	1	61
13560	2	13.34	17.67	1.121	81.7	2	65	3	2	2	34.34	2162	0.011	13834.7	2	16
14044	2	6.53	3.24	0.46	81.7	2	55	4	5	2	28.06	807		2323.3	2	26
25736	2	7.07	3.27	0.578	81.7	2	79	5	2	2	22.65	797	1.39	14973.3	2	39
31297	1	17.42	13.16	0.559	81.7	2	85	3	3	2	26.87	1096	0.667	11318.9	1	46
37897	2	7.39	10.78	0.871	81.7	1	74	1	2	2	23.67	1436	0.011	2103.04	2	58
43672	2	11.43	9.36	1.631	81.7	2	63	3	5	2	19.08	2015	0.048	14201.5	2	63
30332	2	9.66	6.9	1.867	81.8	1	68	1	1	1	32.03	1252	0.018	679.732	1	40
31056	1	23.69	9.35	1.215	81.8	1	85	3	2	2	16.07	1729	0.011	5360.18	2	34
34573	2	10.49	14.93	1.332	81.8	1	66	3	5	2	33.24	2317	0.011	18057.6	2	50
38015	2	31.83	6.73	0.682	81.8	1	77	3	4	2	41.81	1302	0.015	12571.7	2	49
45029	2	9.25	7.04	0.493	81.8	2	68	1	1	1	31.87	1290	0.011	1667.87	2	66
48599	2	11.68	9.91	1.381	81.8	1	57	2	3	2	26.79	1486	0.011	1509.19	2	73
49618	2	5.75	4.98	0.434	81.8	1	66	4	2	1	27.37	1205	0.179	1403.41	2	67
15550	2	15.06	34.89	2.485	81.9	2	64	4	2	1	32.05	1891	0.011	2884.83	1	17
16812	2	16.14	11.31	1.97	81.9	1	56	4	1	1		1870		2420.85	2	25
17360	1	13.23	11.44	1.384	81.9	2	68	3	5	2	25.18	1755	0.011	15322.2	1	22
36201	2	18.97	6.24	0.997	81.9	1	58	3	1	2	37.79	2302	0.036	12592.1	2	44
40869	1	10.13	6.99	1.005	81.9	2	85	3	4	2	29.29	1538	0.021	4920.16	2	49
46167	2	10.2	5.39	0.934	81.9	1	75	3	1	2	25.03	1724	240	3990.84	2	59
20422	2	13.75	9.35	1.199	82	2	64	4	4	2	27.8	1592	0.035	2664.67	1	24
24996	2	9.47	7.32	0.785	82	2	70	1	2	2	27.84	2349	0.011	919.739	2	38
26119	2	19.09	17.21	1.213	82	1	73	3	3	2	26.23	1885	819	7703.08	1	31
26638	2	18.23	5.76	0.869	82	2	65	3	3	2	28.65	1595	0.011	6410.95	1	40
29524	1	10.88	8.52	1.213	82	1	85	3	4	2	32.44	1241	0.03	4511.04	1	35
27031	2	10.65	10.74	1.334	82.1	2	81	3	5	2	24.97	1416	0.011	3921.15	1	41
27620	2	16.42	12.92	1.683	82.1	2	59	3	3	2	32.46	2698	0.062	18591.4	2	34
41676	2	11.84	8.8	0.867	82.1	2	61	3	4	2	23.31	1165	0.02	12573.6	2	63
46975	2	6.88	7.25	0.945	82.1	1	68	2	1	2	25.03	2024	116	2152.81	1	72
51340	2	10.74	4.85	0.927	82.1	1	58	2	1	2	29.69	1135	0.075	1587.77	1	73
10638	2	9.67	7.22	0.867	82.2	1	69	3	5	1	24.8	1441	0.015	9121.07	1	16
25050	1	7.95	9.39	0.434	82.2	1	65	4	1	1	25.76	1255	118	1353.78	2	43
30329	2	7.18	6.08	0.736	82.2	1	57	3	2	1	31.75	1565	235	20294.7	1	32
30711	2	12.33	9.77	1.319	82.2	2	59	3	3	2	33.33	2353	29	35302.4	2	37
31741	1	13.87	11.79	0.731	82.2	1	75	4	4	2	27.5	1778	0.026	2291.17	2	49
40801	2	9.18	7.57	1.36	82.2	2	60	3	5	2	36.52	1463	0.011	30971.5	2	54
45407	1	15.99	14.67	1.786	82.2	2	80	3	2	2	28.24	1675	0.043	13487.1	1	65
50774	1	12.78	12.76	0.793	82.2	1	65	3	5	1	22.41	1626	0.016	5210.71	2	60
13528	1	9.16	5.64	0.895	82.3	2	59	3	4	2	22.81	1754	0.011	23720.9	1	17
19663	2	9.27	5.15	1.043	82.3	2	59	3	4	2	35.05	1633		6059.01	1	23
25657	2	8.31	7.38	0.813	82.3	1	69	3	4	2	25.26	1138	327	5366.15	2	34
33594	2	42.36	15.54	1.629	82.3	1	75	4	5	2	28.54	2799	0.011	3155.23	2	45
35751	2	10.6	7.61	1.354	82.3	2	58	3	3	2	21.53	1863	0.017	56194.6	1	55
36614	2	10.39	9.5	1.707	82.3	1	62	1	1	2	23.91	2409	115	2368.2	1	58
38929	2	13.5	8.38	1.222	82.3	1	59	3	3	2	31.46	2752	143	15014	2	44
39295	2	20.66	12.85	1.655	82.3	1	83	3	4	2	22.91	2112	0.034	7367.8	2	48
45763	2	8.73	8.58	1.016	82.3	1	54	4	2	2	27.46	1314	0.07	2714.52	2	73
49272	2	11.26	6.38	1.127	82.3	2	60	3	5	2	23.31	1272	0.011	22484.3	1	69
49523	2	12.67	18.53	1.659	82.3	2	55	3	4	2	46.41	2392	0.011	38897.5	2	63
12443	2	7.71	6.67	0.52	82.4	2	69	1	4	2	19.76	1491	176	1741.52	2	15
13284	2	11.18	5.93	0.719	82.4	2	64	3	2	2	34.27	1282	1.06	20419.9	1	27
28844	2	13.12	8.65	1.132	82.4	1	59	3	5	2	21.81	1776	0.011	51194.4	1	32
40010	2	8.77	5.6	0.701	82.4	2	63	3	4	1	29.96	2000	0.011	13274.4	1	54
40065	1	13.35	8.94	0.497	82.4	2	63	4	4	2	48.57	1721	0.071	2392.58	1	49
47947	2	11.56	16.86	1.553	82.4	1	80	1	1	2	22.89	2351	0.011	1987.56	2	74
12177	2	10.79	7.32	1.188	82.5	2	69	3	3	2	20.45	1562	0.016	21934.1	2	23
18131	2	8.8	5.59	0.627	82.5	2	62	3	4	2	32.85	1028	311	15386.3	1	21
22363	2	31.54	12.09	2.569	82.5	1	64	5	5	2	21.76	1993	149	2648.96	2	43
24138	2	11.2	7.03	0.788	82.5	2	64	3	4	2	30.92	1310	0.122	22440.8	2	43
24899	2	45.91	33.98	1.421	82.5	2	60	3	5	2	22.68	2091	0.015	10295.9	1	39
32756	2	15.96	13.12	1.282	82.5	1	69	3	3	2	40.18	2545	0.1	18254.4	1	45
35434	2	8.79	6.71	1.121	82.5	1	71	4	2	1	31.32	1389	0.224	2594.94	2	45
41760	2	8.19	8.66	0.9	82.5	2	73	3	3	2	28.2	1355	0.017	13123.8	1	67
42975	1	20.87	18.71	0.844	82.5	1	80	3	3	2	25.78	1714	35.8	6751.18	1	63
46501	1	14.87	16.64	0.795	82.5	2	74	3	2	2	30.74	1380	0.042	10235.7	1	69
12747	2	8.57	4.57	0.716	82.6	1	76	1	1	2	24.65	1542	97.3	2486.71	2	23
16000	2	7.28	5.76	0.571	82.6	2	72	3	5	2	30.19	990	0.02	14266.6	2	16
16726	2	14.73	12.9	1.473	82.6	2	77	3	3	2	23.5	2208	0.011	7129.91	1	23
23043	2	38.82	10.61	1.008	82.6	1	81	3	4	1	27.18	2321	245	2982.69	2	30
25964	2	9.1	13.2	0.557	82.6	1	62	1	1	1	42.53	1190	0.075	478.347	1	34
27179	2	9.41	4.72	0.755	82.6	2	75	3	3	1	39.26	1613	0.14	8196.47	2	33
32858	2	26.61	12.61	1.442	82.6	2	71	3	3	2	29.41	2326	124	14135.9	2	47
38243	2	9.81	6.16	0.808	82.6	1	55	3	2	2	29.56	1946	0.072	15093	1	48
26312	2	15.05	15.13	1.203	82.7	1	62	1	2	2	29.54	2632	55.4	1483.95	2	32
28682	1	12.24	9.07	1.007	82.7	1	78	3	3	2	28.49	1996	0.033	12121.4	1	37
29071	2	20.72	9.22	0.649	82.7	2	55	3	3	2	21.69	1515	144	15739.9	1	40
38071	2	7.68	8.71	0.787	82.7	2	74	3	3	2	18.37	1926	325	24911.7	2	47
24250	2	13.34	7.41	0.977	82.8	2	61	2	1	2	26.52	1637	0.045	3495.28	2	30
26256	2	17.2	11.57	0.651	82.8	1	53	4	5	1	30.84	1558	0.211	18158.6	1	42
26768	1	24.57	10.62	1.253	82.8	2	85	3	5	2	27.34	1514	0.011	5453.21	1	29
32084	2	5.54	5.44	0.509	82.8	1	79	3	1	2	27.45	897	0.011	6079.18	2	50
33006	2	12.57	10.45	0.999	82.8	1	80	3	4	2	32.55	1317	0.076	6918.06	2	46
41506	1	12.6	10.79	1.24	82.8	1	77	3	4	2		2367	0.047	7044.71	1	60
48756	2	10.99	10.34	1.274	82.8	1	67	2	4	2	22.51	2085	289	3105.35	2	64
49066	2	9.47	11.31	1.569	82.8	1	60	3	5	2	21.89	2106	0.02	18723.9	2	61
50112	1	35.18	10.29	1.094	82.8	1	80	4	1	1	30.07	1512	0.046	4445.46	1	67
15641	2	6.02	4.02	0.418	82.9	2	72	4	2	1	40.3	798	0.945	2500.42	1	16
17566	2	16.85	12.84	1.705	82.9	1	58	1	1	2	31.43	2107	0.173	2090.92	2	27
19815	2	18.88	9.93	1.289	82.9	2	82	3	5	2	25.83	2565	0.011	6875.05	1	27
20917	1	9.17	3.36	0.548	82.9	1	66	4	2	2	25.76	955	159	2760.9	1	21
30031	2	7.38	9.75	0.55	82.9	2	63	1	3	2	32.89	1380	0.022	760.114	1	43
34531	2	10.49	9.01	1.148	82.9	1	81	3	1	1	36.72	1388	0.017	1889.66	2	50
34777	2	10.73	10.66	0.978	82.9	2	74	1	1	2	26.43	1509	0.011	1591.11	2	55
35858	2	14.21	9.06	1.124	82.9	1	72	3	3	2	28.67	2410	0.011	14823.1	2	47
47309	2	20.88	13.57	1.651	82.9	2	64	1	4	1	32.58	2113	12.6	1221.8	1	74
12146	2	11.38	9.8	1.199	83	1	60	4	5	1	28.7	2144	1.16	3533.15	2	15
13804	1	21.63	13.15	1.207	83	1	84	3	1	2	24.49	1839	0.011	3768.58	2	22
17373	2	11.84	6.39	1.487	83	2	64	1	1	2	27.78	1464	0.056	3186	2	27
29938	2	5.64	5.6	0.684	83	2	78	1	4	1	40.21	929	0.024	667.386	2	40
37267	1	20.25	13.77	2.033	83	1	61	3	5	2	17.64	2086	0.024	12348.3	2	44
51570	2	14.2	17.39	1.155	83	2	63	3	4	2	21.7	2208	385	17473.8	1	69
11150	2	38.12	11.11	2.043	83.1	2	57	3	4	2	27.77	1895	0.025	24817.2	1	18
18413	2	11.13	12.36	1.045	83.1	1	71	3	4	2	24.61	1912	249	5423.06	2	20
26208	2	20.55	12.3	1.19	83.1	1	66	3	3	2	27.18	1500	0.132	10422.1	2	34
26699	1	13.06	8.44	0.996	83.1	1	80	3	3	2	32.95	1976	0.011	3769.94	1	35
44039	2	7.65	10.36	0.693	83.1	2	57	2	1	1	52.59	991	0.103	1458.28	1	62
44191	2	17.19	6.99	0.821	83.1	1	80	4	4	2	21.46	1524	0.057	3129.97	2	67
24545	2	19.07	13.75	1.063	83.2	2	56	3	3	2	44.19	2793	0.862	8789.36	2	31
27821	2	8.13	7.62	0.411	83.2	2	66	4	1	1	39.44	1478		5545.96	1	32
31379	1	11.24	8.87	1.13	83.2	2	79	4	2	2	34.03	1879	0.023	4504.88	1	50
38505	2	32.84	13.24	2.485	83.2	1	74	4	2	1	33.11	2184	0.036	5865.91	1	49
42181	1	30.19	8.95	2.077	83.2	1	80	3	1	2	25.47	2000	0.022	5166.62	2	62
45755	2	7.72	3.36	0.813	83.2	1	57	4	5	1	33.31	1313	373	4014.25	1	59
51584	2	9.75	7.37	0.672	83.2	1	57	3	3	2	33.63	1905	0.028	14914.5	2	59
27166	2	14.5	8.29	0.873	83.3	1	81	3	5	2	30.48	1834	0.038	6308.19	2	32
32414	1	16.74	10.62	1.073	83.3	2	78	3	3	1	22.86	1859	0.092	31873	2	47
48823	2	12.95	11.45	1.281	83.3	2	60	3	5	2	29.69	1994	0.149	14844.1	2	63
24133	2	11.15	6.85	1.186	83.4	2	75	1	1	2	24.1	1567	0.026	1349.13	1	34
36570	2	13.7	14.08	0.842	83.4	1	60	1	1	2	29.41	2023	0.019	1083.53	2	53
41814	2	42.77	22.51	1.012	83.4	1	80	3	2	2	27.97	1294	289	3475.97	2	60
23789	2	18.5	18.52	1.195	83.5	1	53	4	2	2	26.01	2615	413	6762.44	2	35
24811	2	9.85	5.39	1.086	83.5	2	61	4	2	1	49.53	1229	208	3535.38	2	31
26993	2	11.09	4.35	0.551	83.5	1	80	3	1	2	27.59	2455	0.011	6364.98	2	29
34288	1	15.09	8.92	1.129	83.5	1	83	3	1	2	30.66	2768	0.011	8070.18	1	52
43269	2	13.06	7.53	1.033	83.5	2	65	3	3	2	36.76	2417	0.649	8091.38	2	69
48135	2	24.65	13.18	0.819	83.5	2	64	3	4	2	23.72	1704	383	9715.54	2	61
49841	1	19.19	17.36	1.057	83.5	1	80	3	5	2	25.63	1572	0.011	5972.71	2	62
50138	2	8.69	7.09	0.686	83.5	2	56	4	3	2	24.27	1527		3136.16	2	64
51361	2	9.12	4.41	1.126	83.5	2	62	4	3	2	34.42	1220	0.106	1289.14	1	68
23979	2	25.55	8.92	0.9	83.6	2	57	3	3	2	25.08	1884	0.594	14836.4	2	32
36409	2	11.5	7.41	0.841	83.6	1	61	4	4	2	26.55	1942	235	1755.93	1	44
12272	2	15.23	8.95	2.037	83.7	2	69	3	3	2	25.91	2757	0.011	18806.5	1	27
13963	2	8.76	7.24	0.59	83.7	1	51	4	5	2	27.45	1604		10207.1	2	18
14282	2	15.67	16.75	1.283	83.7	2	55	3	5	2	37.24	2086	0.589	14608.5	1	25
15606	1	12.05	17.63	2.948	83.7	2	75	3	3	2	25.82	2985	0.011	11988.2	1	18
19036	2	15.1	6.93	1.066	83.7	2	77	3	5	2	19.42	1313	0.011	5862.28	2	28
20224	2	5.9	6.05	0.475	83.7	2	81	3	3	2	19.73	1116	0.011	3860.27	1	22
22480	2	10.78	6.4	0.674	83.7	1	61	1	3	2	32.55	2740	0.07	1081.99	2	40
23435	2	13.1	14.05	1.194	83.7	1	76	3	5	1	37.21	2203	0.09	9738.81	2	32
33107	2	12.11	8.04	0.972	83.7	2	57	4	5	2	36.12	2030	0.685	4123.21	1	49
43413	2	19.01	7.92	0.893	83.7	2	61	3	4	2	33.55	1578	96.7	5717.24	2	59
45925	1	20.14	7.72	1.417	83.7	1	68	5	5	2	24.54	1647	0.075	13834.2	2	59
46770	2	7.49	6.01	0.806	83.7	2	70	3	4	2	28.87	2501	390	5064.51	2	66
16069	2	10.82	9.1	0.966	83.8	1	64	3	5	2	26.59	1568	0.011	16493.6	2	17
27024	2	31.14	9.09	1.136	83.8	1	74	3	5	2	33.67	2016	0.11	22017	1	42
37458	2	7.55	4.86	0.778	83.8	2	63	3	3	2	34.61	1912	0.045	11339	2	44
37848	2	9.08	5.17	0.968	83.8	2	57	3	5	2	24.24	1083	0.049	13330.9	2	56
40718	1	16.6	16.41	0.664	83.8	1	82	1	2	2	23.96	1547	0.011	1052.99	2	58
45181	1	9.86	5.98	1.175	83.8	1	80	3	5	2	23.49	1098	0.038	4009.91	1	63
14359	2	25.89	22.07	0.886	83.9	1	61	3	4	2	31.13	1456	0.038	25097.7	2	22
21773	1	8.95	6.99	0.733	83.9	1	73	1	1	2	30.47	1352	0.088	570.765	1	34
28614	2	8.92	10.8	1.035	83.9	2	62	1	2	2	35.78	1316	0.062	1029.86	2	38
29363	2	7.88	5.14	0.568	83.9	2	75	1	1	2	27.39	1166	0.053	1452.94	1	34
33649	1	13.46	10.56	1.194	83.9	1	85	3	3	2		2475	0.07	4419.56	1	45
22668	1	8.64	8.1	0.988	84	1	85	3	5	2	23.36	1714	2.34	7028.3	1	29
42900	1	11.26	6.52	0.993	84	1	63	4	5	1	36.77	1518	0.028	1217.13	1	59
10320	2	32.81	16.58	1.227	84.1	2	62	3	5	2	33.66	2302	0.018	6349.5	1	21
14329	2	12.54	6.72	0.91	84.1	2	64	1	1	2	27.11	1525	0.077	787.596	1	17
20678	2	11.25	6.36	0.883	84.1	2	65	3	3	1	35.71	1465	0.023	16362.5	1	27
24380	2	5.94	4.14	0.707	84.1	2	77	3	5	1	25.6	1124	0.011	8829.92	1	35
34114	2	20.25	7.02	0.962	84.1	1	69	4	3	2	24.51	3354	216	2166.35	1	45
34289	2	11.6	7.23	0.931	84.1	1	61	3	3	1	28.94	1895	0.475	19036.1	2	46
45176	1	12.05	8.52	0.77	84.1	1	65	3	2	1	24.49	1675	264	5014.08	2	66
50043	2	30.93	10.09	0.979	84.1	1	76	3	1	1	27.15	1725	0.074	9242.22	2	61
50354	2	12.35	12.4	0.61	84.1	1	65	3	4	2	24.88	1791	0.011	3558.66	1	59
14120	1	11.28	7.94	1.224	84.2	2	82	3	5	2	26.2	1549	0.017	6056.21	1	17
14578	2	13.21	9.29	0.936	84.2	2	72	1	3	2	26.58	1419	0.011	793.962	1	28
25847	2	4.87	7.92	0.426	84.2	2	59	3	3	2	26.91	762	0.011	16051.8	1	29
27014	1	8.25	6.67	1.053	84.2	1	63	1	1	1	21.97	1069	0.011	2161.16	2	38
35522	1	10.67	4.97	0.583	84.2	2	85	3	4	2	23.96	1124	0.017	10655.2	1	47
48833	2	7.23	9.89	0.707	84.2	2	71	3	2	2	32.09	1295	0.023	8677.06	2	63
35144	2	12.08	12.15	0.934	84.3	1	66	1	1	2	27.39	2051	176	1992.73	2	58
44873	1	15.25	17.37	0.961	84.3	1	80	3	4	2	24.9	2239		13112	2	60
45966	2	18.61	10.84	2.509	84.3	2	53	4	4	2	28.89	3336	0.175	4871.08	1	63
49056	2	15.1	11.37	0.964	84.3	2	62	1	5	2	29.39	1843	0.015	1164.01	2	69
13216	2	5.66	4.95	0.449	84.4	2	66	1	1	2		888	0.086	3050.87	2	27
20479	2	6.93	4.29	0.495	84.4	1	58	3	2	2	24.71	854	132	13958.3	1	26
21504	2	9.82	5.43	1.095	84.4	2	74	5	4	2	24.1	2197	0.032	10108.7	1	40
21956	1	11.79	10.55	1.131	84.4	1	85	3	3	2	22.54	1930	0.011	8842.75	2	39
23326	2	10.05	6.11	0.606	84.4	1	73	4	4	1		1942	109	4047.2	1	41
24837	2	9.2	7.01	0.796	84.4	1	78	3	4	2	21.45	1585	0.11	5768.35	2	35
26803	2	24.96	11.05	18.897	84.4	1	66	3	4	2	25.52	1588	37.5	13913.3	1	29
27903	2	12.91	9.42	0.75	84.4	1	63	3	4	1	29.71	1518	0.011	7275.31	1	40
30723	2	15.48	17.05	1.277	84.4	1	68	3	5	1	31.18	3257	0.593	9002.59	2	32
35165	2	9.24	8.92	1.261	84.4	2	85	4	4	2	23.88	1749	0.034	7657.86	2	54
38163	2	12.6	11.76	1.129	84.4	1	64	1	2	1	29.69	1030	0.168	1139.67	2	58
41971	2	10.77	6.71	1.328	84.4	1	66	4	3	1	19.93	1330	385	1484.81	1	67
45724	2	11.37	15.58	0.945	84.4	1	73	4	4	1	25.77	2207	0.018	2233.48	2	72
15658	2	12.86	10.87	1.029	84.5	1	62	3	5	2	32.32	2073	263	8830.9	2	18
22867	1	5.57	6.83	0.451	84.5	2	72	3	2	1	28.33	1055	0.011	10616.8	2	31
29638	1	13.33	15.53	1.091	84.5	2	84	3	3	2	21.6	2193	0.028	4419.78	1	33
30286	2	33.05	17.1	1.947	84.5	1	76	3	3	1	34.41	1820	0.011	5719.61	2	30
40930	2	10.14	6.11	1.046	84.5	2	67	3	5	2	27.74	1407	318	34105.9	2	53
10306	2	11.55	7.72	1.491	84.6	1	59	3	5	2	26	2956	0.089	11284.8	1	14
13883	1	10.99	6.01	1.085	84.6	2	77	3	4	2	22.1	2042	0.035	15209.1	2	19
23472	2	9.95	4.68	0.848	84.6	2	81	3	3	1	32.75	1481	0.144	5109.16	2	32
28585	2	8.61	8.14	0.49	84.6	2	65	1	4	2	33.07	1296	218	2096.01	1	34
44511	1	9.94	10.23	0.749	84.6	2	80	3	3	1	40.35	1657		9026.49	2	67
17072	2	17.41	10.28	1.853	84.7	2	80	3	4	1	22.53	2518	0.017	7910.17	2	23
22374	1	24.81	15.5	1.754	84.7	1	85	3	4	2	26.34	2083	0.016	7670.65	1	39
23283	2	14.43	14.56	3.905	84.7	2	85	3	3	2	22.81	1790	0.011	9325.84	1	31
27290	1	8	9.33	0.697	84.7	2	83	3	4	2	19.45	1404	0.011	4410.92	1	35
32932	2	29.25	8.41	1.311	84.7	1	74	3	1	2	22.56	1738	0.047	10294.7	1	58
33047	2	22.49	11.22	1.464	84.7	2	58	5	5	2	37.09	2142	0.03	18303.1	2	53
46898	2	15.83	6.27	0.754	84.7	2	80	3	2	2	23.55	2008	0.063	12688.3	2	63
48414	2	8.35	7.75	0.738	84.7	2	58	3	4	1	33.95	1461	122	12306.5	2	60
49773	2	8.91	5.99	1.482	84.7	1	57	3	5	2	24.6	1931	0.074	12933.5	1	63
19959	2	21.76	12.49	1.488	84.8	2	68	1	4	1	28.84	1732	0.011	2474.26	2	27
21304	2	9.41	7.37	0.962	84.8	2	64	3	2	2	21.37	2158	571	3800.38	2	30
22343	1	7.42	5.53	0.416	84.8	2	65	4	4	2	28.69	1263	360	2833.8	2	30
34543	2	11.06	11.85	1.61	84.8	1	67	3	3	2	37.81	2240	0.05	24346.1	2	44
44364	2	12.63	14.63	1.836	84.8	1	80	4	3	2		2980	0.024	2342.32	1	63
51266	2	21.06	16.06	1.174	84.8	1	67	3	3	2	29.33	1741	60.5	11229.8	1	67
9973	2	9.41	9.11	1.391	84.9	2	63	1	2	2	26.6	1970	174	1080.56	2	24
16345	2	8.73	7.4	0.841	84.9	2	60	4	4	2	35.01	1575	0.017	6165.9	1	14
34581	2	7.61	6.55	0.715	84.9	1	53	4	3	2	32.96	1582	2.04	15124.2	2	51
38543	1	11.48	11.66	1.108	84.9	1	67	1	4	1		1680	0.011	2687.6	1	56
44634	2	9.89	5	0.658	84.9	1	74	4	1	2	23.02	1356	556	4178.6	1	67
16273	1	18.8	14.16	1.388	85	2	81	3	3	2	26.68	2011	0.038	8819.85	1	16
16551	2	8.86	8.16	1.016	85	2	57	3	4	2	21.98	1874	104	10164.9	1	17
16665	2	10.71	7.71	0.82	85	2	69	3	4	2	27.83	1932	0.011	16510.6	1	17
[truncated: 855 more rows]

## Sheet: Sheet4
SEQN	cataract	iron	zinc	copper	sele	gender	years	race	education	diabetes	BMI	calore	cottine	weight	SDMVPSU	SDMVSTRA
[truncated: 1,526 more rows]

[truncated: 1 more sheets: Sheet5]
